# Supplementary material for: Tracking Marsupial Evolution Using Archaic Genomic Retroposon Insertions
Source: PubMed Central journal article supplement (PMC2910653; doi:10.1371/journal.pbio.1000436), 2010-07-27
Supplement: pbio.1000436.s001.pdf [file pbio.1000436.s001.pdf]

## **Supplementary Information**

### **Data Set S1. Fasta alignments of all investigated phylogenetic informative loci.**

Tracking marsupial evolution using archaic genomic retroposon insertions.

Maria A. Nilsson, Gennady Churakov, Mirjam Sommer, Ngoc Van Tran, Anja Zemann,  
Juergen Brosius, and Juergen Schmitz

Data set S1.

Fasta alignments of all investigated phylogenetic informative loci.

| Abbreviation | Scientific name                  |
|--------------|----------------------------------|
| Mdo          | <i>Monodelphis domestica</i>     |
| Dvi          | <i>Didelphis virginiana</i>      |
| Mnu          | <i>Metachirus nudicaudatus</i>   |
| Rra          | <i>Rhyncholestes raphanurus</i>  |
| Cfu          | <i>Caenolestes fuliginosus</i>   |
| Dgl          | <i>Dromiciops gliroides</i>      |
| Nty          | <i>Notoryctes typhlops</i>       |
| Pta          | <i>Phascogale tapatoafa</i>      |
| Dgo          | <i>Dasyurus geoffroii</i>        |
| Scr          | <i>Sminthopsis crassicaudata</i> |
| Mfa          | <i>Myrmecobius fasciatus</i>     |
| Bil          | <i>Macrotis lagotis</i>          |
| Pgu          | <i>Perameles gunnii</i>          |
| Iso          | <i>Isodon obesulus</i>           |
| Tro          | <i>Tarsipes rostratus</i>        |
| Ppe          | <i>Pseudocheirus peregrinus</i>  |
| Tvu          | <i>Trichosurus vulpecula</i>     |
| Mro          | <i>Macropus robustus</i>         |
| Ptr          | <i>Potorous tridactylus</i>      |
| Vur          | <i>Vombatus ursinus</i>          |



-ATATAAGATATAAGGTTTTATGATGGGTTTCTTAACTCTAC-----  
TTCCCTGTGTGATGTGATAATTACAATC-----ACCTCTGCT  
G-TGTGAATAGAGAGTCAACTTGTTAAATAAGCAGG-AACAGGGACTAGGGTAGTAATTT  
ATCCCTTTCTGTTTCTCAG--GGCCACC---TACATCAATGGCTTCAGCTTCAGGAAGTT  
TTCCAGGCTCCAATCTATAT

>Cfu

CGGC---GCAGCCCCCTCCTCC---TTCAGGGTTAGGCTATG--GTGAGTGGCC-AGAGTT  
GCAATGGCT-----TTGTTTCCTTCTCTTCTCCTGTCACCT-----  
-----AGAAAT-GAGAAAAGT-----  
-----AGTAAATCC--  
-TCTACTGGGTGATATA-TATGGGGAGGGTGTTCAG-TTTTC-AGTTTAGATGAAAAGT  
C-ATAGA-ATCTTTA-GTGTGCAGTGGAAAAGC-AAGTGGTCATTCATC---TTTAGTTT  
CATTTCATTAATTAACCTG-----TACCAGTTTTTTTATA-TGGAACCATTGGATACTT  
CCAACAAGTACTTTGCTATTGAGAACTTTGTTTTACGGGTCCTTGATAGGTATAGCTG--  
-CTAAAAAATATAAGGTTCTTTGATAGGTTCCCTAACTCGGC-----  
TTCCCTATGCCTCTGGATATCAGAAGAT---GGGGTAGATAATTACAGTCACCTCTGCT  
G-TGGAGATAGAGAAGTGGTTTGTAAATCAGCAGG-AATAGTGTAGTAACTTATATCTT  
A-----TCTGTTCTTCAG--GGCCACC---TACATCAATGGCTTCAGCCTCAGGAAGTT  
TTCCAGGCTCCAATCTATAT

>Dg1

TGGCCCGGCTGCCCTCCACC---TTCAGGGTTAGGCTATG--GTGAGTGGCT-AGGGGT  
ACAAAGGCT-----TTGTTTCCTTCCCTTCTTTCCCTGTCCCT-----  
-----AAGGAAGGGAGGAAAGA--CATTTACTAAGC-----AA  
AACCTTGGGACTAGAA----ATAGAAAAGT-----AGGACCTCC--  
-TCTAAAGGGTGGTCCAACACATGGAGGGGGTTCATTTTTCAAGTTGGACGGGGAAGG  
C-ATAGC-ATCTTTG-GTATGCAATGCCAAAGCCAGTCGATCATGCATC---TTTAGTGA  
CATTGCCATGAATTAATCA-----TGCGGGCTTTT-TAAA-TGGAACCATTGGACATTG  
CT--GAGCACTTTGCCATTGAGAGTTTTGTTTTCCAGGCTTTGGTTGCTGTGGTTG--  
-ATTTAAGCTATAAGGTTCTGTGATGGGTTCCCTAACTTTGC-----  
TTCCCTGTTTCCCTTGGTATCAAATGAT-----GGGATGACAGTCACCTCTCCTG-T  
G-TGG--ATGGAGAAGCAGCTTGTTAAATAAGCAGGAATAGGGA-CCAGGGTAGTAACTT  
TTTTTCTTTTGTTCCTTAG--GGCCACCACCTACATCAGTGGCTTCAGCCTCAGGAAATT  
T-CCAGGCTCC-AGTCATAT

>Nty

TGCCCTCCTCCCCCTCCTCC---TTCAGGATTAGGCTATG--GTGAGTACT-GGGGGT  
GCAAAGATT-----TTGTTTCTTCCCTTCTCTCCCTGTCCCTC-----  
-----AAGGAATGGAGGAAA-----  
--CCTGGGGAGTATGG-----  
-----TAC--ATAGTGGGTTTCAGTTTTCC-AGTTAGA-TCAGAAGG  
C-ACACC-ATCTTTA-GGGTGCAATGGCAAAGC-AGGTGATCATGCATC---TTTACTGA  
CATTTCATTCATTAACCA-----TACCAGCTTAT-TCTC-TGGAACCATTGGACATTG  
CC-----ATTGAGAGTTTTGTTTTCCAGGCCTTTGGTAGCT-AGGATG--  
-ATAGAACTTTTAGGTTCTGTGATGGGTTCCCT-ACTCTATGCC-----  
TTCCCTGTGCCTCTGGGAATCAAAAAAT-----GGGATGATTACAGTCACCTTTGCT  
G-TGTGGATAGAGAAGCAACTTGTTAAATAAGCAGCAATA-GTGAAGTGGTAATAACTC  
GTGCTCTTTTGTTTTTTAG--GGCTCCACCTACATCAATGGCTTCAGCCTCAGGAAATT  
TTCCAGGCTCCAATCTGTAT

>Dgo

TGGCCCGGCTGCTGCTCCTCCTCCTTCAGGGTTAGGCTATG--GTGAGTGGC-----  
-----CCATCCTCC-----  
-----AAGGAATGGAGAAAAGA-ACATTTATTAAGTTTTTACTCTGTCTAAAGCATATA  
AACCTTGGGGGTATAA----GTAGAAAAGT-----AGGAGTTCC--  
-TCTAATGGATGAGACACTATATGTAGAGGTTTTTCAG-TTTGCAAGTTGAA-TGATAAGG

C-ACAAC-ATCTTTAAGGGTGCCGTGGCAAAGC-AGGTAATCTTGTGTC---TTTAGTAA  
CAATTGCATTA-TTAAACCA-----CACCAGCTTTT-TATG-TGGCACTACTGGGCACCG  
CC---AAATACTTTTCTGTTGAGAGTTTTGTTTTTCAGGGTCTTTGGTAGTTATGACTG--  
-ATAAAAACCTATAAGGTTCTGTGATGATATCC-TAACTCTGC-----  
TTCCCTGTACTTCTTGGTATCAAAAAAT-----GGGAGAATTATAGTCACCTCTGTT  
G-GGTGGATAGATAAACAACCTTGTAATAAT-----ATGGTAATAACTT  
A-TCCTTTCTGTTCTTCAG--GCCACCACCTACATCAATGGCTTCAGCCTCAGGAAATT  
TTCCAGGCTCCAGTCTCTAT

>Mfa

WGGCCCGGCTGCTCCTCCTCC---TTCAGGGTTAGGTTATG--GTGAGTGGCTGGGGGAG  
GGGGGAGGTGCCAAGACTATTTCTTCCATTCTTTCCCATCCTCC-----  
-----AAGGAATGGAGAAAAGA-ACATTTATTAAGTTCTTACTATGTCTAAAGCATATA  
AACCTGGGGAGGTATA---AATAGAAAAG-----AGGAGTTCC--  
-TCTAATGGATGATACATTATATGTAGAGGG-TTCAG-TTTTCAAGTTGGA-TGGTAAGG  
C-ACAGGCATCTTTAAGGGTGCA-GGGCAAAGC-AGGTAATCACGTGTC---TTTAGTGA  
CAATTCCATTA-TCAAACCA-----TACCAGCTTTT-TATG-TGAAATTACTGGGCATTG  
CC---AAATACTTTTCTGTTGAAAGTTTTGTTTTTCAGGGTCTTTGGTAGCTATGACTG--  
-ATAAAAGCTATAAGGTTCTGTGATGGTTCTTACGCCCCCCCCCCCCCAACTCTGC  
TTCCCTGTACCTCTTGGTATCAAAAAAT-----GGGAGAATTATAGTTACCTCTGCT  
TGGGTGGATAGAGAAACAACCTTGTAATAAT-----ATGGTAATATCAT  
ATTCTTTCTGTTCTTTAG--GCCACCACCTACATCAATGGCTTCAGCCTCAGGAAATT  
TTCCAGGCTCCAGTCTCTAT

>Bil

TGGCCACCTGCCCCCTCCTGC---TTCAGGGTTGACCTATG--GTGAGTGC-----  
-----TTTTTCTCCTT-CTCTCTCTCCCTGTCCCC-----  
-----AGGGACAC-AG-----TT-TTGTGTCCAAAACATATT  
----TTGAGAATATAA----ATAGAAAAGT-----CGAAGCTTC--  
-TCTAATGGGAG-----TTTGC--TTTTCAAATTGGA-TGGGAAGG  
CAAAAGC-ATCTTGA-GGGTGCAATGGTAAAGC-AGGTAATCATACGTC---TTAATGG  
CATTCCCATCAGTTAAATGA-----TACTAGCTTTTTGAAAGTGGAACCATTGGGCACAC  
TC---AAGCATTTTGTATTGAGAGTTTTGTTTTCC-----AACTG--  
-ATAAAAGCTATAAGATGCTCAGATGGGCTCCTTAACTCTGC-----  
-TTCCTCTGCCTCTTACTACTCAAAAAAT-----GAAATAATTGCAGGCTCCTCTGCT  
G-TGCAGATAGAGAATCAAATTATTAATAAGCAGA-AGTAGAGACTGGTGTAGTAACTT  
ATCTTCTTCTATTCTTCAG--GGCCACCACCTACATCAATGGCTTCAGCCTCAGGAAATT  
TTCCAGGCTCCAATCTATAT

>Tro

WGGCTCGGCTGCCCCCTCCTCC---TTCAGGATTAGGCTACG--GTAAGTACTTGGGGGGG  
ACAAAGAT-----TTTGTGTCTTGT----TCTC-YCCTGGCCCC-----  
-----AAAGGGAGGAGGAAAGA-ACATTTATGAAGTTCTT---GTGTCTAAGGC---TT  
AACCTTGGGGATTTCA---GTAGAAGAAT-----AGGCGCTCT--  
-TCTAATGGGTGATACAGCTAATGTAGGAGCTTTCAG-----TTGTA-GGGGAAGG  
C-ACAGC-ATCTTTAAGG-TTCAGTGGGAGAGT-AGGTGGTCATGGATC---TCTAGTGC  
CATTTCATTAATTARACTA-----TGCC-----ACTG  
CC---AGGCCCTTTGCCCTTGAGCACTTTGTTTTCTGGCTCTTTGGTAGATTTAACCA--  
-TTATAAGCTAGAAGGTTCTTTTGATGGATCCCTAAC--AAC-----  
TTTCCTGTGCCTCTTGGTTTTAAAAAAGGCAGGAATAAAGTCACCTTTGCT  
G-TGTGGAYAGAGAAGTAGCTTGT--ATAAGCATGAATTAGGGGCTAGGGTAATCACTT  
GTCCTCTTCTTTCTTTAG--GGCCACCACCTACATCAATGGCTTCAGCCTCCGAGGTT  
TTCAAGGCTCCAATCTATAT

>Ppe

MGGCTCAGGTGCCCCCTCCTCC---TTCAGGGCTAGGCTATG--GTAAGTGCCT-GGGGGT  
ACAAAGAT-----TTTGTTCCTTCTTCTCTCCCTGTCCCCA-----

-----AAGGAATGGAGGAAAGA-ACATTTATTAAGTTCTTACTGTGTCCAAAGC---TT  
AACCTTGGGGGCATCA----ATAGAAAAGT-----AGGAGCTCC--  
-TCTAATGGGTGATACAACACATGTAGGAGGTTTGGATTTTTG-AGTCAGA-TGGAAAGG  
C-ATAGC-ATCTTTA-GGCTTCAGTGACAAAGC-AGGTGATCATGGATC---TTTAGTGA  
CATTTCCATTAATTTAATTAACCTATGCCAACTTTT-TATA-TAGAACCCTGGATGCTG  
CC---AAGCACTTTGCCATTGAGATTTTTGTTTTCTGGTCTTTGGTAGCTATA-CTG--  
-ATATAAGCTATAAGGTTCTTTGATGGGTTCCCTAACTCTAC-----  
TTTCCTTTGCTTCTTGATATTAATAAAAAA----GGGGAGTAATTAAAGTCACTTTTGGC  
G-TATGGATAGAGAAGCACCTTGT--ATAAGCAGGAATTAGGGACTAGGGTAATAACTT  
ATCCTCTTCTGTTCTTTAG--GGCCACCACCTACATCAATGGCTTCAGCCTCAGGAAGTT  
TTCAAGGCTCCAGTCTATAT

>Tvu

AGGCCCGGCTGCCCTCTTCC---TTCAGGGTTAGGCTACG--GTGAGTGCCT-GGGGGT  
GCAAAGAC-----TTTGTGTTGCTTTCTTTCTTTGCCTGTCCCC-----  
-----AAGGAATGGAGGAAAGA-ACATTTATTAAGCCTTTGCTGTGTCCAAAGCATAAA  
--CCTTGGGAGTGTA-----ATGGGAAAGT-----ATGTGCTCC--  
-TCTAATGGGTGATACAGCACATATAGGGGGTTTTCAGTTTTTTG-AGTCAGA-TGGGAAGG  
C-ACAGC-ATCTTTA-GG-TGCAACGGCAAAGC-AGATGATCATGCATT---TTTAGTGA  
CATTTCCATTAATTATACCA-----GTTTTTTTTAATA-TGGAACCCTGGACACTG  
CC---AAATGCTTTGCCATTGAGAGTTTTGTTTTCCAGGTCTTTGGTAGCTATAGCTG--  
-ATATAAGCTAGAAGGTTCTGTGATGGGTTCCCTAACTCTAC-----  
TTTTCTGTGCCTCTTAATACCAAAAAAT-----GGGATAATTACAGTCACCTCTGCT  
T-TGTGGATAGAGAAGCAGCTTATTAATAAGCAGGAATTAGGGACTGGGGCAATAACTT  
ATCTGCTTCTGTTCTTCAG--GGCCACCACCTACATCAGTGGCTTCAGCTTCAGGAAGTT  
TTCAAGGCTCCAGTCTATAT

>Mro

TGGCCAGCTGCCCTCCTCC---TTCAGGGTTAGGCTATG--GTGAGTGCCT-GGGGGT  
GCAAAGAC-----TGTATTTCTTCTTTTTTCTCCCTGTCCCC-----  
-----AAGAGATGGAGGAAAGA-ACATTTATTAAGCTCTTACTGTGTCCAAAGTGTA  
--CCTTGATCCTATA-----ATGGAAAAGT-----AGGAGCTCC--  
-TCTAATGGATGATAAAGCACAAAGTAAG---TTTCAGTTTTAC-AGTCAGA-TGAGAAGG  
C-ACAGC-ATCTTTA-GGGTGCAATGGCAAAGC-AGGTG-TCATGCACC---TTAACGA  
CATTTCCATTAATTAACCTG-----TACTAGCTTTT-TATA-TGGAACCCTGGACACTG  
CC---AAGCACTTTGCCATTGAGAGTTTTGTTTTCCAGGTCTTTGGTAGCTATGGTTG--  
-ATATAAGCTAGAAGGTTCTGTGATGGGTTCCCTAACTCTAC-----  
TTTCCTTTGCCTCTTGATATCAAAAAAAT-----AGGATAATTATAGTCATCTGTGCT  
G-TGTGGCTAGAAAAGCAGCTTGTAAATAAGCAGGAATTAGG-----GTAGTAACTT  
ACCCTCTTTTGTTTTTTCAG--GGCTCCACCTACATCAATGGCTTCAGCTTCAGGAAGTT  
TTCAAGGCTCCAATCTATAT

>Ptr

TGGCCAGCTGCCCTTCTCC---TTCAGGGTTAGGCTATG--GTGAGTGCCT-GGGCGT  
GCAAAGAC-----TTTTATTTCTTTTCT---CTCCCTGTCCCC-----  
-----AAGGATGGAGGAAAGA-ACATTTATTAAGCTCTTACTGTGTCCGAAGTGTA  
--CCTTGATCCTATA-----ATAGAAAAGT-----AGGAGCTCC--  
-TCTAATGGATGATAAAGCACAAAGTAGG---TTTCAGTTTTGC-AGTCAGA-TAAGAAGG  
C-ACAGC-ATCTCTA-GGGTGCAATGGCAAAGT-AGGTA-TCATGCACC---TTAATGA  
CATTTCCATTAATTAACCTG-----TACCGGCTTTT-TATA-TGGAACCCTGGACATTG  
CC---AAGCACTTTGCCATTAAGAGTTTTGTTTTCCAGGTCTTTGGTAGCTGTGACTG--  
-ATATAAGCTAGAAGGTTCTGTGATGGGTTCCCTAACTCTAC-----  
TTTCCTGTGCCTCTTGATATCAAAAAAY-----GGGATAATTATAGTCACCTGTGCT  
G-TGTGGCTAGAAAAGCAGCTTGTAAATAAGCAGGAATTAGGAATTAGGGTAGTAACTT  
AYCCTCTTTTGTTTTTTCAG--GGCTCCACCTACATCAATGGCTTCAGCCTCAGGAAGTT  
TTCAAGGCTCCAATCTATAT







-----  
-----GAGGGGCAGCTAGGTGGTGCAGT  
GGAT-AGAGCACCAGCCCTGGAGTCAGGAGGACCTGAGTTCAAATCCAGCCTCAGACACT  
TA-----CTAGCTGTGTGACCCTGGGCAAGTCACTTAACCCCAATTGCCTC-----  
-----AAAAAAAAAAAAA-----  
-----

>WSINE1

-----GAGGGGCAGC  
TAGGTGGTGCAGTGGAT-AGAGCACCAGCCCTGGAGTCAGGAGGACCTGAGTTCAAATCC  
AGCCTCAGACACTTA---CTAGCTGTGTGACCCTGGGCAAGTCACTTAACCCCAATTGC  
CTCAAAAAAAAAA---AAAA-----  
-----  
-----

>retropseudogene

-----CCTTCTTTACCCTGGAAACTACCTGACCCCATCTTTATGCA

TTTAAACCATCTTCCTCTTTGAAAGTTCTTGACCTTTGTCAAGTTTCTCAAATAGAAAC  
CT-----

>L1\_Mdo3a\_3end

-----TTTTTTTTTTTTTTTA  
A--AATTTTATTTAATTAATTAATTTAGAAATTTTTTCCATGGTTACAAGAATCATGTT  
CTTTCCCTCCCCTCCCCCACCCCCCTCCCATAGCCGACGCGCAATTCCACTGGGTTTTA  
CATGTGTCATTGATCAAGACCTATTTCCATATTATTGATATTTGCACTAGGGTGATCATT  
TAGAGTCTACATCCCAATCATATCCCATCGACCCATGTGATCAAGCAGTTGTTTTTCT  
TCTGT-----

>WSINE1

-----TTTTTTTTTTTTTTT--  
-----GAGGCAATTGGGGTTAAGTGAAGTGGCCAGGGTCACACAGCTAG--  
---TAAGTGTCTGAGGCTGGATTTGAACTCAGGTCCTCCTGACTCCAGGGCTGGTGCTC  
TATCCACTGCACCACCTAGCTGCCCCCTC-----





--GTAAGTAGGAGAAGGT-----  
-----  
-----  
-----  
-----CTCTTTTTTC---AAGATGA-----  
-----AAAGGAGAGGATACTAGGGAGACATTTAGGAAACATCTTATATATG-TCCAAC  
TTATGTAGTATTACTGGACGGAA--TGGGTCCTTTGA---CTGGCAAGGCAAGTAGCATT  
CTAGGTGAGGACAGTAGTATGAATAGAGAAGCCCAGAGGGAGAACTCATTTGCA-----  
-----  
-----  
-----GGGAAAAGTTTATAGTGTAGT-----  
-----TTGATGAGAGAGT-----GGAGGTATGGCTGGAAAGGTAAGGG  
ATGGTCTATTTGTGGAGAATTTT-GACAAGACAAGCTAAGGAACT--AACTTTGTTCAT-  
GAAG-----  
-----  
-----TAGTAGGGG---GTCTTTAAAAG---TTTTTAAACGCAG-CGTAACCTTGGTCA--  
-CCTTATTT-----TAAGGAGACAATA-----GGGAATGATAATACTTGCTC  
TGTCTACTTCATAGGGTTGTTGTAAAAACAAA-----  
-----  
-----TCAG---ATGAGAT-----  
-----  
-----ACTGGTT-----  
-----GGGAAA-GGACTATG-----AGAGCTAGAAAGCACTCTACAAAT  
GTGAGATTATACTCTTTTTCTCTCTCCCAG--GAGATGAATTGCCCT  
>Nty  
TTTCCTACACCAGTGTCCGTAGTAACAGCTCTTACCTGGGCAGTGATGAAATGGGATCTG  
--GTAAGTAGAATAGGGC-----  
-----  
-----CA--TTTTC---AAAATGA-----  
-----AAACAAGAGGGCCTTAGGGAGAC---AGGAAAGATATGGTGCACA-TCCATAA  
ATGTGTAGCATTGTCAAGTGGAA--GGGGTCTTTGG---TGGGAAGGATGAATAGCATT  
CCAGGCAGAAACAATAGTATGA--ACAGAGGCCAGAGGGTAGACTGTTTTTTCA-----  
-----  
-----GGAAACAGTTAA--TGTAGA-----  
-----TTGATGAGAGAATATGCAAGAGAAATTAA-GGGAGATAAAGTTGCGAAGATAGGAC  
ACAGTCAGATGGTGAAGAACCCTT-GGCAAGACAAGCTAAGGAGCTAAGGCTTTATTCAG-  
TTAA-----  
-----TAGTAGGGG---GCCATTGAAGG---TTTTCTATTATTTTC-----CATAATCAGA  
TTCATATTT-----TAAAGATATGACAG-----GAGA-TGATAATTCTTACCC  
TGCCTATGTCATAGGATTCTTGTAAAAA-----AAAGTCAG----GGGGCAGC  
TAGATAGTGCAGTGGAT-AGAGCACTGACCTTGGACTTAGGAGGACCTGAGTTCAAATCT  
AGCCTCAGACATTTGATACTTAGCTGTGTGGCCTTAGGCAAGTCACTTAACCCCAATTGC  
CTAGGGGAAAAA---AAAGTCAG---ATGAGAT-----  
-----

-----ATTGGCT-----  
---GAGAAAGGACCAGAA-----GTAGAGAGTACTACCTGGAA  
GTGAACTTTCTCATTCTGTTCTTTCTCCCAG--GAGATGAGTTGCCTT

>Pta

TTTCCTACACCAGTGTCCGTAGTAACAGCTCTTACCTGGGTAGTGATGAGATGGGATCTG  
--GTAAGTAGGATAGGGC-----

-----CA--TTTTC---AGGATGA---A  
AAAAAAAAAAGAGGATGCTAGCAAGACAGTGAGGAAAGATGTGGTATACA-TCCATAT  
ATGTGTAGTATTGTCATATGGAA--GGAGGTCTTTGG---TGAAGAG-----AATGTT  
CCAGGCAGAGACAATAGTGTGA--AC---TGCCCAGAGGGTGGACTGATTATCA-----

-----GGGAACAGTT-----  
-----GGG  
GGGT-----GTGGT-AAGAAA-ATATTAGCAAGCTAAGGAGC-----TCAGA  
CTTA--TAGTAGGGA--CTTTCTTTATCCTGGAAACTACCTGATCCCATCTTTATGTA  
TTTAAACCATCTTCCTCTTTGAAAGTCCTTGACCTTTGTCAAGCTTCTCAAAATAGAAAT  
CT--TAGTAGGGC--GCTATTGAAGG--TTTTGAAAGTGGGGA--TA--TCATCAGA  
TCTTTATTT-----TAAAGAGATGACA-----GAGGATGATAATCCTTGCTC  
TGCCAA----CAAGGATTCTTGTTTAAAAAAA-----

-----ATCGG--ATGAGAT-----

-----GTTGACT-----  
---GGGAAA-AGACTACC-----GAAAGTGTGAAC  
TTTCATGTACTTCTTTGTTCTCTCTCCCAG--GAGATGAGTTACCTT

>Dgo

TTTCCTACACCAGTGTCCGTAGTAACAGCTCTTACCTGGGCAGTGATGAGATGGGATCTG  
--GTAAGTAGGACAGGGC-----

-----CA--TTTTC---AGGATGA---  
---AAAAAAAAAGAGGATGCTAGCAAGACAGTGAGGAAAGATCTGGTATACT-TCCATAT  
ATGTGTAGCATTTGTCAGATGGAA--GGAGGTCTTTGG---TGCAGAGAATGAGTAATGTT  
CCAGGCAGAGACAATAGTGTA--AC---TGCCCAGAGGGTGCACTGATTTTCA-----

-----GGGAACAGTTAAAGGTATAGA-----  
---CTG---AGAGAGTTTGCAAGGAAA-TTAATGGGGATAAAGTT-----  
GGGTGGTGGTGGTGGT-AAGAAA-ATATTGGCAAGCTAAGGAGC-----TCAGA  
CTCC--TAGTAGGGA--CCGTCTTTACTCTGGAAATTACCTGATCCCATCTTTATGTA  
TTTAAACCATCTTCCTCTTTGAAAGTCCTTGACCTTTGTCAAGCTTCTCAAAATAGAAAC  
TT--TAGTAGGGA--G-----TA--TCATCAGA  
TCTTTATTT-----TAAAGAAATGACA-----GAGGATGATAATCCTTGCTC  
TGCCAA----CAAGGATTCTTGTTTAAAAAAA-----

-----  
-----  
-----ATCAG---ATGAGAT-----  
-----  
-----GCTGACT-----  
---GGGAAA-AGACTACG-----GAAAGTGTGAAC  
TTTCATGTATTTCTTTGTTCTCTCTCCCAG--GAGATGAGTTACCTT  
>Scr  
TTTCCTACACCAGTGTCCGCAGTAACAGCTCTTACCTGGGCAGTGATGAGATGGGATCTG  
--GTAAGTAGGATAGAGC-----  
-----  
-----CA--TTTTC---AGGATGAAAAA  
AAAAAAAAAAGAGGATGCTAGCAAGACAGTGAAGAAAGATCTGGTATACA-TCCATAT  
ATGTGCAGCATTTGTCAGATGGAA--GGGGTCTTTGG---TGCGGAGAATGAGTAATGTT  
CCAGGTAGAGACACTAGTGTGA--AC---TGCCCAGAGGGTGGACTGATTTTCA-----  
-----  
-----TGGGACAGTTAATGGTATAGA-----  
---TTG---AAAAAGTATGCAAGGGAAATTAATTGAGA-TAAAATT-----GGCGGG  
GGGTGGTGGTGGTGGT-AAGAAA-ATGTTGGCAAAC TAAGGAGC-----TCAGA  
CTCC---TAGTAGGGA--CCTTCTTTACCCTGGAAACTACCTGACCCCATCTTTATGCA  
TTTAAACCATCTTCTCTTTGAAAGTTCTTGACCTTTGTCAAGTTTCTCAAAATAGAAAC  
CT---TACTAGGGA--GCTATTGAGGG---TTTGTAAGTGGGGAGTAA---CACCAGA  
TCTATATTT-----TAAAAGATGACA-----GAGGATGATAATCCTTGCTC  
TGCCAA---CAAGGATTCTTGT'TTTTAAAAAAA-----  
-----  
-----ATCAG---ATGAGAT-----  
-----  
-----TTTACT-----  
---GGGAAA-AGACCACG-----GAAAGGGTGAAC  
TTTCATGTACTTCTTTGTTCTCTCTCCCAG--GAGATGAGTTACCTT  
>Mfa  
TTTCCTACACCAGTGTCCGTAGTAACAGTTCTTACCTGGGCAGTGATGAGATGGGATCTG  
--GTAAGTAGGATAGGGC-----  
-----  
-----CA--TTTTC---AGGATGA-----  
---AAAAAAGAGGATGCTAGCAAGACAGTGAAGAAAGATCTGGTATATG-TCTGTAT  
ATGTGCAGCATTTGTCAGGTGGAA--GGGGATCTTTAG---TACGAAGAATGAGTGATGTT  
CCAGGCAGGGACAATACGATGA--AC---CTCCCAGAGGGTGGACTAATTTTAA-----  
-----  
-----GGGAACAGTTAATGGTGTANA-----  
---TTG---ATAGAGTATGCAAGGGAAATTAATGGAAAATAAAGTT-----  
-----GGAGGGTGGT-AAGAAA-ATGTTGGCAAAGCTAAGGAGC-----TCANA

CTCC---TAGTAGGGA---CCTTCTTTACCCTGGAAATCACCTGACCCCATCTTTATGCA  
TTTAAATCATCTTCCTCTTTGAAAGTCCTTAACCTTTGTCAAGCTTCTCAAAATAGAAAC  
CT---TAGTAGGGA---GCTATTTATTGAAGTTATTAGGTGGAAAGTAA-TATGATCAGA  
TCCATATTT-----TAAAGAGATGACA-----GAGGATGATAATCCTTGCTC  
TGCCTA----CAAGGATTCTTGTTAAAGAATAAATA-----

-----ACCAA---AAAAAAC-----  
-----CAGGANT---TCTNGTTTTTTTTTTTTTTTTTTTTTTTTTTT  
AAGTCAGATG-AGATGCTG-----GCTTGGAAAAGACCATGGAAAGTGTGAAC  
TTTCATGTA---CTTTGTTCTCTCTCCCAG--GAGATGAGTTACCTT

>Bil

TTTCCTACACCAGTGTCCGTAGTAATAGCTCTTACCTGGGCAGTGATGAGATGGGATCTG  
--GTAAGTAGAATAAGGC-----

-----CA--TTTTC---AAGATGA-----  
-----AAAGGAGAAGATGCTAGGGAGACATTTAGGAAATATTAGGTGGGTA-TTCATAT  
ATGGGTAGCATTGCCTGGTAGAA--GGGGCTCTTCTTAGATGGAGAGGACAAGTGGCATT  
CTAGGCAGAGAAAATTGTAAGA--ACAGA--GGCAGAGGATAAACTTATTTTCA-----

-----GAGAACAGTTAGTAGTATAGA-----  
----TTAATGAGAGCATGTGCAAGAGAAATTAATGGGAGATAAAAATTGGGAAGGTAGAAG  
ACATTTAAACAGTGAATATTCTT-GAAAAGACAAGGTAAAGAGCTAAGACCTTATTCAG-  
AAAA-----

----TAGTAGGGA---GTCATTGAAGA--TTTTGCAGGTGGGGAATGA-CATAATCAGA  
TCCATATTT-----TAAAGAGATGAAAA-----GA-GTTGACA-----GTGC  
TGCCCACTTCATAGGATTCTTGTTAAA-----

-----GTCAA---TTGAGAT-----

-----ACTGGCT-----  
----GGTTAA-GGACAATG-----AGAAGTAAAAAGCACTACACCAGTGTGGCT  
T-----ACTCACTTGTTCTCCCTGGCAG--GGGATGAATTGCCTT

>Pgu

CTTCCTACACCAGTGTTCGTAGTAACAGCTCTTACCTGGGCAGTGATGAGATGGGATCTG  
--GTAAGTAGGATAGGGC-----

-----CA--TTTTC---AAGATGA-----  
-----AAAGGAGAAGATGCCAGGGAGACATTTAGGAAATATTAGGTGTACA-TTCATAT  
ATAGGTAGCATTGTGCATGTAGAAGGGGGGGC--CTTAGATGGGGAGGATAAGTGGTATT  
CTAGGCAGAGAAAATAGTATCA--ATAGA--GGCAGAGAATAGACTCATTT-----



-----  
-----  
-----CAGCTAATAGTATAGA-----  
----TTAATGAAAGAATATGCAAGGGAAATTAATGAGAGATAAAAATT-----GGGAAG  
GTACAAGACATTTAAAGATTCTT-GGCAAGATAAGCTTAAGAGCTAAGACTTTATTTCAG-  
AAAA-----  
-----TAATAGGGA---GTCATTGAAGA--TTTTGCAGATGGGGAATGA-CATCATCAGA  
TCCATGTCT-----TAAGGAGATGAAAA-----GAGA-TGACA-----ATGC  
TGCCTACTTCATAGGATTCTTGTTAAAAA-----  
-----  
-----GTTAG---ATGAGATA-----  
-----  
-----ACTAGCT-----  
----GGTTAA-GGACAATG-----AGAAATAGAAAGCAGTACACCAATGTGGTT  
T-----ACTCATTTGTTCTCCCTGGCAG--GGGATGAATTGCCTT  
>Iso  
TTTCCTACACCAGTGTTCGTAGTAACAGCTCTTACCTGGGCAGTGATGAGATGGGATCTG  
--GTAAGTAGGATAGAGC-----  
-----  
-----CA--TTTTC---ATGATGA-----  
-----AAAGGAGAAGATGCCAGGGAGACATTTAGGAAATATTAGGTGTACA-TTCATGT  
ATAGATAGCATTTGTCATGTAGAA--GGGGCC--CTTAGATGGGGAGGATAAGTGGTATT  
CTAGGCAGAGAAAATAGTATCA--ATAGA--GGCAGAGACTAGACTCGTTTTCA-----  
-----  
-----GAGAACAGCTAATAGTATAGA-----  
----TTAATGAAAGAATATGCAAGGGAAATTAATGAGAGATAAAAATTGGGAAGGTACGAG  
ACA-----TTTAAAGATTCTT-GGCAAGATAAGCTTAAGAGCTAAGATTTTATTTCAG-  
AAAA-----  
-----TAATAGGGA---GTCATTGAAGA--TTTTGCAGATGGGGAATGA-CATCATCAGA  
TCCATATCT-----TAAGGAGATGAAAA-----GAGA-TGACA-----ATGC  
TGCCTACTTCATAGGATTCTTGTTAAAAA-----  
-----  
-----GTTAG---ATGAG-----GGCGGCTAGGTGGCGTAGT  
GGATAAGAGCACCCGGCCCTGGAGTCAGGACTTCCCTGAGTTCAAATCCGGCCTCAGATACT  
TACTAAT-TACCTAACTGTGTGGCCTTGGGCAAGCCACTTAACCCCA-TTGCCTTGCAAA  
ACCTTAAAAAAAAAAAAA---GTTAGCT-----  
----GGTTAA-GGACAATG-----AGAAATAGAAAACAGTACACCAATGTGGTT  
T-----ACTCATTTGTTCTCCCTGGCAG--GGGATGAATTGCCTT  
>Ppe  
TTTCCTACACCAGTGTCCGTAGTAACAGCTCTTACCTGGGCAGTGATGAGATGGGNTCTG  
--GTAAGTAGGACAAAAC---CATTTTC--TTTTTCTTCTTTTTCTTTTTCTTTTTGG  
AGAGGGGAAGGTAGGGCAGTTGTGGTTAAGTGAAGTGGCCCAAGGTCACAGGGGTAGTTTT  
GTGTTAAGTGTG--AGGCTGGATTTGAACTCAGGTCCTCCTGACTCCAGGGCTGGTGTCTC  
TATTTCAGTGAGCCACCTAGCCACCCCAACAGGAC---CA--TTTTC---AAGATGA-----

-----AAAGGGGAGGACACTAGGGAGACTTTTAGGAAAGATCTGGTGTACATTACATAT  
ATATGTAACATTGTCAGGTGGAA--GGGGTCTTCAG---TGGGGAGGATGAGCAGGATT  
CCAGGCAGAGACAGTAGTGTGA--ACAGAGGCCCAGAACGTGGACTAGTTTTCA-----  
-----  
-----  
-----  
-----GGAAACAGTTAATAGTATAGATTGATGAGAGAGTATGCAAG  
CAAATTAATGGGAGATAAAGCT-----GGCAAGATAGGAG  
GCAGTCAAATAGTGGAGAACCTT--GGCAAGACAAGCTAAGGAGCTAAGACTTTATTTCGG-  
TAAA-----  
-----  
-----TAGTAGGGA--GCCACTGAAGA--TTTTGCAGATGGTGAGTAA-CATGATCAAA  
TTCATATTT-----TGAAGAGATGACAA-----GAAA-TGATGATGTTTG---  
-----TTTCATAGAATTCTTGTTTTAAAAAAAT-----  
-----  
-----GTCAG--ATGAGAT-----  
-----  
-----ACTGGCT-----  
-----TGTGAAA  
T-----TACTCACTTGTTCTCTCTCTAG--GAGATGAGTTGCCTT  
>Mr0  
TTTCCTACACCAGTGTCCGTAGTAACAGCTCTTACTTGGGCAGTGATGAGATGGGATCTG  
--GTAAGTAGGATAGGGC-----  
-----  
-----CA--TTTTC---AAGATGA-----  
-----AAGGGAGAGGATGCTAGGCAGACATTTAGGGAAGATCTGGTGTACA-TCCTTTT  
CTGTGTAGCATTGTCAGGTGGAA--GAGGGTCTTTGG---TGGGGAGGATGAGCATCATT  
TCAGGCAGAGACAGTAGTATGA--GCAGAGGCCCAGAAGGTGGACTAATTTTCA-----  
-----  
-----  
-----GGGAACAGTTAATAGTATAGA-----  
-----TTGATGAGAGAGTAAGCAAGGAAA-TTAATAGGAGATAAAATTGGGAAGGTAGAAG  
AAAGTCAAATGGTGGAGAACCTT--GGCAAGACAAGCTAAGGAGCTAAG-CT--ATTCAG-  
TAAA-----  
-----  
-----TAGTAGGGT--GCTGCTAAAGA--TTTTGTAGGTGGGGAGTAA-CATGATCAGA  
TCCATATTT-----TAAAGAGATGACTG-----GAGG-TGACAATGCTTGGCC  
TGCCTACTTCTCAGGATTCTTGTT-AAAAAAAT-----  
-----  
-----GCCAG--ATGAGAT-----  
-----  
-----ACTGGCT-----  
-----GGGAAA-GGACTGTG-----AGAAGTAGAAGGCACTACACAGATGTGCAC  
T-----GACTCACTTGTTCTCTCTCCCAG--GAGATGAGTTACCTT  
>Ptr

TTTCCTACACCAGTGTCCGTAGTAACAGCTCTTACTTGGGCAGTGATGAGATGGGATCTG  
--GTAAGTAGGATAGGC-----  
-----  
-----CA--TTTTC---AAGATGA-----  
-----AAGGGAGAGGATGCTAGGCAGACATTTAGGAAAGATCTGGTGTACA-TCCTTTT  
ATGTGTAGCATTGTCAGGTGGAA--GGAGGTCTTTGG--TGGGGAGGATGAGCGGCATT  
TCAGGCAGAGACAGTAGTGTGA--GCAGAGGCCCAGAAGGTGGACTGATTTTCA-----  
-----  
-----GGGAACAGTTAATAGTATAGA-----  
---TTGATGAGAGAGTATGCAAGGAAA-TTGATAGGAGATAAAGTTGGGAAGGTAGAAG  
ACAGTCAAATGGTGGAGAACCCTT-GGCAAGACAAGCTAAGGAGCCAAG-CT--ATTCAA-  
TAAA-----  
---TTGTAGGGT--GCTGCTAAAGA--TTTTGCAGGTGGGGAGTAA-CATGATCAGA  
TCCATATTT-----TAAAGAGATGACTG-----GAGG-TGACAATGCTTGCCC  
TGCCTACTTCACAAGATTCTTGT--TAAAAAAAT-----  
-----  
-----GCCAG--ATGAGAT-----  
-----  
-----ACTGGCT-----  
---GGGAAG-GGAC--TG-----AGAAGCAGAAGGCACTAC-CAGATGTGAAC  
T-----TACTTGTTCTCTCTCCCAG--GAGATGAGTTGCCTT

>Human

-----CAGACTCCACATCCCTTGTGGGTTTGGAGTT--CTGTAGCTGT  
ATCCCCCT-----CTTAGGAAAGTGCTGGGGATGG-----

-----  
-----  
-----TGTGAGGTGGGGCAGGAATGACTGATGG-C  
T-----GCTGCTTCTACCTCCTGCCAG-GAGATGAGCTGCCCT

MARKER 20

>Mar1c\_Mdo

-----  
-----GTTTCAG-T---CGTTCAGTC  
GTGTCCGACTCTTCGTGACCCCGTGGACCATAGCACGCCAATACTGTCCATGGGGTTTTTC  
TTGGCAAAGATACTGGAGTGGTTTGCCATTTCTCTCCAG-----TGGAT-----  
--TAAGGCAAACAGAGGTTAAGTGACTTGCCCAGGGTCCACACAGCTAGTAAGTGTCTGAG  
GCCGGATTTGAACTCAGGTCTTCTGACTCCAGGCCCGGCGCTCTATCCACTGAGCCACC  
TAGCTGCCTCC-----  
-----  
-----  
-----  
-----  
-----  
-----  
-----  
-----  
-----

>Mdo

ATGACAAAGGATACAGCAATAGA--GTAATACGTTGCTT---AATTCAGGGAGTGTA-CC  
-ATAGAATATCTAATGTAGAACTTCATTTTCAG---AAAATTGCAGAT---TGTTTAGTT  
GTGTTTGATTCTTTGTAACCTCCATGGACCATAGC-----TATCCATGGGGTAGTC  
TTGGCAGAAATACTGGAATGATTTGCCATTTTCTTCTCCAGCAGATTCCTGGATCCTTT  
TATCAGCCAATTAAGGATAAGTGCTTTGCCAGAGTTGTGTAGCTAGGTTGTATCTGAG  
GGCAGATCTAAAGTCAGATCTTCTGACTTTGGTCTTAGCACTCTACCCAATGAACCA--  
TAACTGTCTCT--AAAATTGCAGAA-----ACTTT-ACTTT--AAGATAAAATAAAT  
GCTTAATTGTATGACCATAAGTCATTAATATAAGCACTTAAAA-----TATTTTTTAC  
TATGATTTTACTCCATGTCTTTTGGAGCTAATTTATATATTAAGTTATCTCCATAGGGC  
AAGAAGGT-GGGAGAGAA-GATTC-TGTGCTGTGTGTTTCATTTATAA-TGATTC-----  
-----  
-----

-----TTTTGTTTTCTTTTTTTAATTG--GTTTTACTATTTTT  
-AAAGTTTTCTAT-----TGATAAGCATAGAAA---TGTACTTATATTACTGTTTGTTA  
TTTTAATTGCAGATCCAATATAATGTATGTTGAATTGTACCAATAGTGTTCTCCTTTTTT  
-AAAAG

>Dvi

ATGACNAAGGATACAGCAATCGA--GTAATACAT--TTT----ATTCAAGAAGTGCA-CC  
-ATANAATATCTAATGTAGAACTTCATTTTCAT---AAAATTGCAAAT---TGTTTCAGTT  
GTGTCTGACTC--TGTGACTCCATGGACCATGGC-----TATCCATGGGATAAAC  
-TGGCAAAAATACTAGAATGATTTGCCATTTCTTTTTCCAGCAGATTCCTGGATTCCTTT  
TGTCAACCAGTTAAAGGTTAAGTGCCCTTGCCAAGAGCTTTGTATCTAGGTTGTATCTGAG  
GGCAAATCTGAAGTCTGGTCTTCTGACTNTAGTCNTAGTTCTCTACCCACTCAACCA--  
TAGCTGTCTNT--AAAATTGCAGAAAAA---ACTTT-AATGNT--AAGATAAAATAAAT  
GCTTAAGGGTATGACCATAANTTATTAAGATAAGCATTTAAAA-----TATTTTTTAC  
TATGATTTTACTCCATGTCTTTTGGAGCTAATATATNTATTGAAGTTATCTCCATAGGGC  
AAGATGGT-GGGAGAGAA-GATTC--GTGCTGTATGTTAATTTATAAATTATTC-----  
-----  
-----

-----TTTTGTTTAATTTTT--AATTA--GTTTTACTATTTTT  
-AAAGTTTTCTAT-----TGATAAGTGTGAAA---TGTAATTATATTACTGTTTGTTA  
TTTTGATTGTAGATCCTATATAATGTATGTTGAATTGTACCAATAGTGTTNNCANNNNNT  
T-AAAT

>Mnu

ATGACAAAGGATACAGCAATCGA--GTAATACAT--CTT----ATTCAAGAAGTGCA-CC  
-ATAGAATATCTAATGTAGAACTTCATTTTCAT---AAAATTGCAAAT---TGTTTCAGTT

GTGTCTGACTC--TGTGACTCCATGGACCATGGC-----TATCCATGGGATAAAC  
-TGGCAAAAATACTAGAATGATTTGCCATTTCCCTTTTCCAGCAGATTCCTGGATTCTTT  
TGTCAACCAGTTAAAGGTTAAGTGCCTTGCCAAGAGCTTTGTAGCTAGGTTGTATCTGAG  
GGCAAATCTGAAGTCTGGTCTTCTTGACTCTAGTCCTAGTACTCTACCCACTCAACCA--  
TAGCTGTCTCT--AAAATTGCAGAAAA--ACTTT-AATGTT--AAGATAAAATAAAT  
GCTTAAGGGTATGACCGTAAGTTATTAAGATAAGCATTTAAAA-----TATTTTTAC  
TATGATTTTACTCCATGTCTTTTGGAGCTAATATATGTATTAAAGTTATCTCCATAGGGC  
AAGATGGT-GGGAGAGAA-GATTC--GTGCTGTATGTTTAATTTATAAATTATTC-----  
-----  
-----TTTTGTTTCATTTTT--AATTA--GTTTTACTATTTTT  
-AAAGTTTTCTAT-----TGATAAGTGTGAAT---TGTAATTATATTACTGTTTGTTA  
TTTTGATTGTAGATCCTATATAATGTATGTTGAATTGTACCAATAGTGTCTCCTTTTTT  
TAAAAG

>Cfu

ATGACAAAGGATACAGCAATCGA--GTAATGCATTGCTT--AATTCAAGAAGTTCGTGC  
-AAGGAATATCTAATATAAAAACTTCATCTCAT---AATATTGCAAAC-----  
-----  
-----  
-----ACTTT-AACTTT-AAGATAAAATAGAT  
GCTTAACTCTATGGCTGTATGTCATAAAAGATAAGCATTTTACT-----  
--CTGTTTTACTCTGTGTCTTTGGGGGCTTATCTATATCCTAAAATTGTCCCATAGGAC  
AAGAGTAT-GGGG-AAAA-TATTC-TGTGCCACATATTTTCATTTATGA-TTATTA-----  
-----  
-----CTTTGTTTCCTTTTA--AATTA--GTTTTACTATTTTT  
-AAAGTTTTCTATGTTGTTGAAATGGGTAAAA-----TATGACTATATTACGATTTGCTA  
TTTTAATTGCAGAGCCTATATAATGTATATTGACTTGTACCAATAGTTTTCTCCTTTTTT  
-AAAAG

>Dgl

ATGACAAAGGATACAGCAATAGA--GTAATACATTGCTT--AATTCAGGAAGTATA-CT  
ACTGGAGTATCTAATGTAGAAACATCATCTCAT---AAAATTGCAGAT-----  
-----  
-----  
-----ACTTT-AACTTT-AAGATAAAATAAAT  
GTTTAACTCTGTGACT--AAGTCATCAAAGATAAACATTTAAAA---TAC-TCTTTTAC  
TATCATTTTACTCCATGTCTTTTGG-----AAAATTATCTCCATATGAC  
TAGAACTT-GGGAGAAAA-GATTC-TGTGCTATGTATTTTCATTTATAA-TGATTA-----  
-----  
-----TTTTGTTTCCTTTTT--AATTG--GTTTTACTATTTTT  
---AGTTTTCTATTTTATTGAAAAGGGTAGAAA---TGTAATTGTATTACCATTGCTA  
TTTTGATGGCAGATTCTATATAATGTATATTGAATTGTACCAATAGTGTCTCCTTTTTT  
-AAAAG

>Nty

ATGACAAAGGATACAGCAATCGA--GTAATGCATTGCTT--AATTCAGGAAGTATA-CT  
AATGGAATATCTAATGTAGAACTTCATTTTCAT---AAAATTGCAGAT-----  
-----  
-----  
-----ATATT-AACTTT-AAGATAAAATAAAT

GCTTAACTATGTGACTATGAGTCATTTAAGATAGACATTTAAAT----TAC-TCTTTTAT  
TATGATTT-----  
-----AA-GGATCCTGTGTACACATATTTCACTTATGA-TGACAA-----  
-----  
-----TTTTGTTTCCTTTTA--AATTT--GTTTCACTATTTTT  
-AAAGTTTTCCATTTTATTGAAAAATGTAGAAA----TGTAAGTGTATTACCATTTGCTA  
TTTTGGTTTTAGTTACTATATAATGTATATTGAATTATACCAATAGTGTCTCCTTTCTT  
-AAAAG

>Dgo

ATGACAAAGGATATAGCAACCGA--GTAATGCATTGCTT--AATTCAGGAAGTATA--C  
-ATGGAATATAAAAATGTAGAACTTCATCTCAT--AAAATTGCAGAT-----  
-----  
-----

-----ACTTT-AACT-----TAAAATAAAT  
GCTTAACTATGTGACTATGGGTCCATAAAGATAAGCATTTAAAG----TAT-TCTTTTAC  
TATGATTTTTACTCCCATATAATTAG-----  
---AACAT-GGGGGGAAA-GATTCT-ATGCCATGAGTTTTATTT-----TTA--TT  
TTTACTTATTTTTTATTCATTAAATTATTGATGTTTTATTTATGATGGTTTATTATG---C  
CATTAAATTTATGATGACTA--TTTTGTTTCCTTTTT--AATTAAAGTTTTATTATTTTT  
-AAGGTTTTCTATTTTATTGAAAAGGGTAGAAA---TGTAATTGTATTACCATTTGCTA  
TTTTAATTGCAGATCCTATATGATGTATATTGAATTATAGCAATAGTGTTTTTCTTTTTT  
-AAAAG

>Scr

ATGACAAAGGATATAGCAACCGA--GTAATGCATTGCTT--AATTCAGGAAGTATA--C  
-ATGGAATATAAAAATGTAGAACTTCATCTCAT--AAAATTGCAGAT-----  
-----  
-----

-----ACTTT-AACT-----TAAAATAAAT  
GCTTAACTATGTGACTATGGGTCCATAAAGATAAGCATTTAAAG----TAT-TCTTTTAC  
TATGATTTTTACTCCCATATAATTAG-----  
---AACAT-GGGGGGAAA-GATTCT-ATGCCATGAGTCTTATTT-----TTA--TT  
TTTACTTATTTTTTATTCATTAAATTATTGATGTTTTATTTATGATGGTTTATTATG---C  
CATTAAATTTATGATGACTA--TTTTGTTTCCTTTTT--AATTAAAGTTTTATTATTTTT  
-AAAGTTTTCTATTTTATTGAAAAGGGTAGAAA---TGTAATTGTATTACCATTTGCTA  
TTTTAATTGCAGATCCTATATGATGTATATTGAATTATAGCAATAGTGTTTTTCTTTTTT  
-AAAAG

>Mfa

ATGACAAAGGACACAGCAATCGA--GTAATGCATTGCTT--AATTCAGGAAGTATA--C  
-ATGGAATATCAAATGTAGAACTTCATCTCCC--AAAATTGCAGAT-----  
-----  
-----

-----ACTTT-AACTTT-AAGATAAAATAAAT  
GCT-----ATGTGACTATGAGTCCATAAAGATAAGCATTTAAAA----TAC-TCTTTTATG  
TATGATTTTTACTCCCATTGATTAG-----  
---AACAT-GGGGGGAAAAGATTTT-ATGCTACGATTTTCATTT-----TTA--TT  
-----CATTAATTTATTGATGATTTATTGATGATGGTTTATTATGATAC  
CATTAAATTTATGATGATTA--TTTTGTTTCCTTTT--AATTA--GTTTTATTATTTTT

-TAAGTTTTCTATTTTATTGAAAAGGGTAGAAAGAAGTATAATTGTATTACCATTTGATA  
TTTTGATTACAGATCCTATATGGTGTGTATTGAATTACAAAAGTAGTGTTCCTTTTTT  
-TATAG

>Bi1

ATGACAAAGGATACAGTAATCGA--GTAATACATTGCTT---AATTCAAGAAGCATA-CC  
AATGGATTATCTAATGTAGAA-CTTCAACTCAT---AAAATTGTAGAT-----

-----ACTTT-AACTTTTAAGATAAAGTAAAT  
GCTTAACTGTGTGACTATGAGTCTTTAAAGATAGGCATTTAAAAGGCATACCCTTTTCCT  
TATGATTTTATTCCAGGTCTTTTGG-----AAAGTTATCTCCACAGGAC  
AAGAACAT-GGAGCAAAA-GATTCTTGTGCCACATGTTTCATTT-----TGATTA-----

-----TTTTGTTTCCTCTTT--AATTA--GTTTTACTATTTTT  
-AAAGTTTTCTATTTT---GAAAAGGGTAGAAA----TG---TAACATTAACATTTGTTA  
TTTTGATTGCAGATCTTTTATAATGTATATTGAATTATAACCAATAGTGTTCCTTTTTT  
-AAAAG

>Pgu

ATGACAAAGGATACAGCAATCGA--GTAATACATTGCTT---AATTCAAGAAGTGTA-CC  
AATGGATTATCTAATGTAGAA-CTCCATCTCAT---AAAATTGCAGAT-----

-----ACTTT-AACTTT-AAGATAAAATAAAT  
GCTTAACTGTGTGACTATGAGTCCTTAAAGATAGGGATTTAAGAGGCATAC-TTTTTTCT  
TATAATTTTATTCCATGTCTTTTGG-----AATATTATCTTCACAGGAC  
AAGAACAT-GGGGGAAAA-GATTCTTGTGCTACATGTTTCATTT-----TGATTA-----

-----TTTTGTTTCCTCTTT--AATTA--GTTTTACTATTTTT  
TAAAGTTTTCTATTTTATTGAAAATGGTAGAA-----GTA-TAACATTAACATTTGTTA  
TTTTGATCGCAGGTCTTTTATAGTGTATATTGAATTATAACCAATAGTGTTCCTTTTTT  
-AAAAG

>Iso

ATGACAAAGGATACAGCAATCGA--GTAATACATTGCTTCTTAATTCAAGAAGTGTA-CC  
AATGGATTATCTAATGTAGAA-CTTCATCTCAT---AAAATTGCAGAT-----

-----ACTTT-AACTTT-AAGATAAAATAAAT  
GCTTAACTGTGTGACTATGAGTCCTTAAAGATAGGGATTTAAAAGGCATAC-TTTTTTCT  
TATGATTTTATTCCATGTCTTTTGG-----AATATTATCTTCACAGGAC  
AAGAACAT-GGGGGAAAA-GATTCTTGTGCCATATGTTCCATTT-----TGATTA-----

-----TTTTGTTTCCTCTTT--AATTA--GTTTTACTATTTTT  
TAAAGTTTTCTATTTTATTGAAAATGGTAGAA-----GTA-TAACATTAACATTTGTTA  
TTTTGATCACAGGTCTTTTATAGTGTATATTGAATTATAACCAATAGTGTTC-----

>Tro

ATGACAAAGGATACAGCAATCGA--GTAATGCATTGCTT---AATTTAAGAAATGTA--C





-----ATTTT-AACTTT-AAGATGAAATAAAT  
GCTTAACTGTGTAACATATGGTTCATTGAAAATAAGCACTTAAAA---TAT-TCTTTTAC  
TAGGATTTTACTCAATGTCTTTTGG-----AAAGTTATCTCCATAGGAC  
AA--GGGT-GGAGGAAAA-GATTCT-ATGCCATGTGTTTCATTTATGA-TCATTA-----

-----TTTTGCTTCTTTTT---AATTA--GTCTTAGTATTTTT  
--AAGTTTTCTCTTTTATTGAAAAGGGTAGCAA---TGTAAGTGTATCACCATTTGCTA  
TTTTAATTGCAAATCCTATGTAGTATATATCAATTGTACCAATAGTGTCTCCTTTTTT  
-AAAAG

>Ptr

ATGACAAAGGATACAGCAATCGA--GTAATGCGTTGCTT--AATTCAGGAAGTGTA-CC  
AATGGAATATATAATATTGAAACTTCATCTCAT---AAAATTGTAGAT-----

-----ATTTTT-AACTTT-AAGATAAAATAAAT  
GCTTAACTATATAACTATGGTTCATTAAAAATAAGCACTAAAA---TAT-TCTTTTAC  
TAGGATTTTACTCAGTGTCTTTTGG-----AAAGTTATCTCCATAGGAC  
AA--GGAT-GGAAGAAAA-GATTCT-ATGTCATGTGTTTCATTTATAA-TCGTTA-----

-----TTTTGTTTCTTTTT---AATTA--GTCTTAGTATTTTT  
--AAGTTTTCTGTTTTATTGAAAAGGGTATCAA---TGTAAGTGTATTACCATTTGCTA  
TTTTGATTGCAAATCCTAAATAGTGTATATCAATTGTACCAATAGTGTCTCCTTTTTT  
-AAAAG

>Vur

ATGACAAAGGATACAGCAATCGA--GTAATGCGTTGCTT--AATTCAGGAAGTGTA-CC  
AATGGAATATCTAATGTAGAACTTCATCTTAT---AAAATTGAAGAT-----

-----ACTTTTAACTTT-AAAATAAAATAAAT  
GCTTAACTGTGTAACATATGATTCATTAAAGATAAGCATTAAAA---TAT-TCTTTTAC  
TATGATTTTACTCTATGTCTTTTGG-----AAAGTTACCTCCACAAGAC  
AAGAACAT-GGGGGAAAA-GATTCT-GTTTCATATATTTTCATTTATGA-TGATTA-----

-----TTTTGTTTCCTTT---AATTA--GTCTTACTATTTTT  
-AAAGTTTTCTGTTTTACTGAAAAGTATAGAAA---TGTAAGT--ATTACCATTTGCTA  
TTTTGATTGCAGATGATATATAATGTATATGAATTGTACCAATGGTGTCTTCTTTTTT  
-AAAAG



ATAATGAATTGAAA-TTTGATGTGTTCAAATGGTCCCCAGTAGATAG-----  
-----TGTTTTGAAGAGGCAGACCATAGCTAAGAAAATA---CCCCCTGCACCCA  
CCTGGCTCCAACCTGCAACAGAGAAAGAGTATTTCTTTCTGGGTCTCAAAGCTTCCTTCC  
CTCAAATTTTCAGGTCTCGATGCTTCCCTTCATCCTCTATTTGGAGATCTCCATGTTCTTAC  
CC-TTTGAAGCAGCTCTCTCACCTCAATGCT-----TT  
CTACTCTC---AACTTTCATTCTTTAGTTCTGATCCTACATCTTCACCAGCATTACCACC  
-ACCACTCACTTTGTTCC---TACAAGCTAT-----TGGTTAGTTGTTTCAGTTGTGTC  
TGATTCTCTCTGACCCCATTTGGGTTGAGGGTTCTTTTGGCAAGGATACTAAACTAATTT  
GCCATTTCTTCTTTCAGCTAAT--TTTACAGCTAAGGAAACTGAGGCAAACAGGGTGATG  
TGGCTTTCCCAGGATCACACAGATAGTTAGTG-CTGAGACTGGATTTAAACTTATGAAGA  
AGAGTCTTCTGATTCCA-----TACAAGA  
CAT-----AGGACGAGGT-ATTTAAAGCCACTCAGAGAA-CTCTTC  
TC--ATTTCCCAACTAT-----GGATACAAGCATAAAAAG  
AAATACAGAAGACCAAAAGCATAAGAACTTATGTAACCCAAGGACAGAAAGGTTTGCAT  
GCTTTCCAAGACTTAC--TTTCCTTT--GTTAAATACGGA

>Dvi

CCATGCATCCTTGTGTACAATCGAC--CTTCRAAAAAGATAGGATTATAATTACAGTGG  
GGGCCAAACTATCCCTTGA-TTATCTAGACTGTTCCCCCGCCCTTGGTCAAATTAACCT  
TAAAGAAAGGAATTTTTTTAAGTTCTATTTCAATTTGAGGG-----CA  
TTTGTAGCCTTAGTCAGG--AGTGAAAGATGAACTCAAGTTTTTGAATGAAATTTTAA--  
GAG-----TATAAAGAATCTTAGCTGAACAAACTAGGTATATGRAACCTGAAGAAGAG  
AAGACTTGGAGGAGGAGG-----CATGACAATCATCTTCAA-GTATGAGAAGGACCTAA  
AGAATGACTAGAAA-TTTGATGTGTCAAATGGACCCCGATAGATAGAACCAGAGGCAAT  
GGG---TGGGTGTTTTGAAGAGGCAAACCATAGCTAAGAAAAT---CCCCCTAGACCTA  
CCTGGCCCCAACTGCATCAGAGAAAGAGTCTWTTTTATCTGGATCTCAAAGCTTCCTTCC  
CTCAAATTTTACATCTCATTGATTCCTTCACCTTCTATTTGGAGATCTCCATGTTCTTAC  
CCATTTGAAGCAATTCTCTCCCCTCAATCTTTTTTTTCTATTGTCAACTTGAAGTAAATT  
CTACTTGCTCACGAAGTCATTCTTTAGTTCTAACCCCTGCATCTTCTCCAGCATCAGCACC  
-ACCACCACTTTGTTCC---TACAAGCTAT-----TGTTTAGTCGTTTCAGTTGTGTC  
TGATTCTTTATGACTCCCTTT-----AGGTTTGTTTTGGCAAGGATACTAAACTGATTT  
CCATTTCTTCTCCTCATCTAAT--TTTACAGATAAGGAAACTGAGGCAAACAGGGTGACA  
TGACTTGCCCAGGATCACACAGATAGTAAGTTTATGAGACTGGATTTAAACTCATGAAGA  
TGAGTCTTCTGATTCCA-----TACAAGA  
CAT-----AGGACAGGGG-ATTTAAAACCACTCAGAGCA-CTCTTC  
TC--ATTTCCCAACTGT-----GGATACAAGCATAAAAA  
AA-TACAGAAGACCAAAAGTACAAGCAACTTATGTAACCCAATGACAGAAAAGTTTTTCAT  
GTTTCCAAGACTTAC--TTTCCTTT--GTTAAATATGGA

>Mnu

CCATGCATCCTTGTGTACAGTCGAC--CTTCAAAAAAAGATAGGATTATAATTACAGTGG  
GGGCCAAACTATCCCTTGA-TTATCTAGACTGTTCCCCCACCCCTTGGTCAAATTAACCT  
TAATGAAAGGAATTTTTT-AAGTTCTATTTCAATTTGAGGG-----CA  
TTTGTAGCCTTAGTCAGC--AGTGAAAGATGAACTCAAGTTTTTGAATGAAATTTTAA--  
GAG-----TATAAAGAATCTTAGCTGAACAAACTAGGTATATGAAACCTGAAGAACAG  
AAGACTTGGAGGAGGAGG-----CATGACAATCATCTTCAA-GTATGAGAAGGACCTAA  
CGAATGACTAGGAA-TTTGATGTGTTCAAATGGACCCCAATAGATAGAACCAGAGGCAAT  
GGG---TGGGTGTTTTGAAGAGGCAAACCATAGCTAAGAAAAT---CCCCCTAGACCTA  
CCTGGCCCCAACTGCATCAGAGAAAGAGTCTTTTTTTATCTGGATCTCAAAGCTTCCTTCC  
CTCAAATTTTACATCTCATTGATTCCTTCACCTTCTATTTGGAGATCTCCATGTTCTTAC  
CCATTTGAAGCAATTCTCTCCCCTCAATCTTTTCTTTCTATTGTCAACTTGAAGTGAATT  
CTACTTGCTCACAAAGTCATTCTTTAGTTCTAACCCCTGCATCTTACCAGCATCAGCACC  
-ACCACCACTTTGTTCC---TATAAGCTAT-----TGTTTAGTTGTTTCAGTTGTGTC  
TGATTCTTTATGACTCCCTTT-----AGGTTTGTTTTGGCAAGGATACTAAACTGATTT  
CCATTTCTTCTCCTCAGCTAAT--TTTACAGATAAGGAAACTGAGGCAAACAGGGTGACA

TGACTTGCCCAGGATCACACAGATAGTAAGTTTATGAGACTGGATTTAACTCATGAAGA  
TGAGTCTTCTGATTCCA-----TACAAGA  
CAT-----AGGACAGGGG-ATTTAAAACCACTCAGAGCA-CTCTTC  
TC--ATTTCCCAACTGT-----GGATACAAGCATAAAAA  
AA-TACAGAAGACCAAAAGTACAAGCAACTTATGTAACCCAATGACAGAAAGGTTTTTCAT  
GTTTCCAAGACTTAC--TTTCCTTT--GTTAAATATGGA

>Cfu

CCATGCATCCTTGTATACAGTTGAC--CTTCAAAGAAGACAGGCTTTTTATTAAGATAG  
GGGCCAAAGCCTTCACTGGATTATCTAGATTGCTATTTT---CCCTGGTCAAATAAACTT  
TTTA-AAAGAA---CTTAAAAACTTCACTTCATTTTAATG-----CA  
TTTACAG---TAGTCAGTAGAGTAAAA--TGGATTCATATTTTGGAAATGAAATTTTAA--  
--GCATT---TCTTTAACATCCTAGTT-AAAGAACTTAGTATGTGGAC--TTAAGAAGGG  
AAGACTTGGAGGAGCAGG-----CATGACAATCATCTTCAA-GTAGGTAAAAGACTTAT  
AAAGCAAATTGGAAATTATATTTGCTCTAATAGACCCA-GAAGGCAAATGAGAATCAAT  
GGA---TGGATGTTTT-----ACTAGTCCTT-----CTCAGATACA  
TCTGACTCCAAGTGGAGCATAGAAAGACTCT--CTTAGCTCCATCTCAAATCTCCCTTCC  
CTGAAATTTCAAGCCTTATTGCTTCCTT-----TATTTGGAGATCTTCATGCTCTGAC  
CC-CTTGAAGCAATGCTTTTGTCTCAATCCTTCCCGTCTACT-ATAGCTTGAAATAAATT  
CTACTTGCTCACTAACTCATTCTTTAGTTCTGACCTTAAAGAATTATCATGGCCACCACC  
-ATCCCCACTTTGTTCC-----

-----TGCAAAT  
T-----GGAGT-AACTAAAGAAGTTCAAAGTAGATCTTC  
TGTAATCTCCATTTATGATCATAAGTATATGGACATGGGTACACATAAAAGTAGAAAA  
AAATACAAAACACCAAAGCATAAGCAACTTAAGTAACCCAACGATAGAAAGACTTGCAT  
GTTTCCAAGACTTAC--TTTCCTTT--GTTAAATATGGA

>Dgl

CCATGCATCCTTATGTACAATTGAC--CTTCAAAGAAGATAGGGTTATAATTAGTTCAG  
GGGTGAGAACATTCATTGAATTATCTAGATTACTCTTTT---CCTTGATCAAAAA-----  
-----TCTCCACTTCTTTTATGGA-----CA  
TTTATAGCCTTAAACAACAAAGTAAAA--TGGACTTGAATTTGGGGATGAAAGTTTAAAA  
GAGAATT---TATATGGCCCTCTAGTTGAAAGAACTAGTTATGTGAAGCCTGGAGAAGGA  
AAGACTTGGGGGAGAAGG-----CATGACAGTCTTCGTTAA-GTACCTGAAGGACCTGT  
ACAGGGAATAGGGA-TTAGATTTGTTCTAGTGGACCCAGCAGGCAGAACCAGATGAAAT  
GGG---TGGAAGTTTTGGAGAAACAGACCATAGGTAAGAAAG----CCCCCTAGA-----  
-----CCCAACTGCAACAGAGAAAGACTTTCTCTTATCTGGGCCTCAAAGCTCTCTTCC  
CTGAAATTTTAGGTCTTACTGCTTCGTTACCCTTTATTTGGAGATCTTCATGCTCTGTC  
AC-CTTGAAGCACTTCTCTTGCCTCAACTCTTCTTTCTATTGTCAGCTTGAAGT-----  
-----TATTCCTTAGTTTTGACCCTGCTTCATCA-----CC  
CA--CCCCACCTTACTCC-----

-----CATTTTGTTTCCTACAT  
TGTAT-----AGAATGGGGT-ATCTAAAGTAATTCAGAAT-GTTCATC  
TA-AATCTCCAATTAT-----GGACATGAATATAAAAG  
AAACACAGAAGACCAAAAGCATAAGCAACCCACATAACCCAAACACAGAAAGGTTTGCAG  
GCTTCCCAAACCTTAC--TTTCCTTT--GTTAAATATGGA

>Pta

CCATGCATCCTTGTGTACAGTTGAC--CTTCAAAAAAATATGTTTATAGTTTTATTTA  
GGGCCAAAGCATCCACTGAATTATCTAGATTCTGTTTT---CCTTGCTCAAAAA-----

-----CTCCATTTCAATTTGAGGT-----CA  
TTTACAGCCTCAGTCAGCAAAGTAAAA--TGAAGTCAAGTTTTTGGAAATAAAATTTTAAAA  
GAGCATT--TATATAGCATCCTAGTTGAAAGAACTAGTAATGTCAAGCCTGGAAAAAAG  
AATACTAGGGGGAGGAAG-----TATGACAGTCTTCAAAAA---TGTGAAGGACTTAT  
TCAGGGCTTAGAGA-TTGGATTTGTTCTAATGGACCTCAGAATGCAGAATCAGAGGCAAT  
GGG---TGAATGTTTTCCAGAGGCTGACCATAAGTAACATGTT----CCCTCCAGTCACA  
CCTGGGCCCAACTGCAACAGAGA---CTCTTTCTTATCTGGGTCTCAATGCTTCCTTCC  
CTGAAACTTCAGGCCTTATTGGTTCCTTCACCCTTTATTTGTAGATTGCCATCCATTC--  
---CTTGATGCGTCGCTCTTGCCTCAATGCCTTCTTTTTGTTGTCAGCTTAAA-----TT  
CTACTTGCTCATTAAATTCATTCTTTAGTTCTGATCCTGCATCATCATCCAC-----CT  
CA-CCCCATTTTGTAC-----

-----TGTGAAG  
TAT-----AGGAT-----ATTTAAAGTAAATTGGAGT-TCTCTTC  
TA-AATCTCCCAGTTAT-----GGATACAAGTGTAAG  
AAATACAAA--TCAAAAGCATAAGTCATTCATGTAACCCAAATACAGAAAGCTTTTAAT  
GCTTCCCAAGACTTAC--CTTCCCTTTGGTTAAATATGGA

>Tro

CCATGCATCTTTGTGTACAGTTGAC--CTTCAAAGAAGWTAGGGTTATAGTCAGTGCAG  
AGACAACAGCATCCATTGAATTATCTAGATTGCTATTTT--CCTKGATTAAAAA-----  
-----CTCCACTTCATTTGAGRG-----CA  
TTTCCAACCTTAGTAAGCAAAGTAAAR--TGAAGTAAAGTTTTGGAATKAAATTTCARCA  
GAGCCTT---TATATAY---CCTAGTTGAAAGAACTACTTATGTGAAGCCTGGAGAAAGG  
RAGATTTAAGGAAGGAAG-----CACGACAGTCATCTTCCAARTATGTGAAGGACTTAC  
ACARGGAATAGGGA-TTAGATTTGTTCCAATGGATCCCAGAAGACAG-----  
-----TTCATAYACATWTRARAAAGCYCCCCTGAACCCA  
CCTGGACCCAACCTGCAACAGAGAARGACTCTTTCTTAGCTKGGTCTCAAAG---CTTCC  
CTGAAATTTTCAAGATCTTATTGCTTCTTTTACCCTTTATTTATAAATGTTTCATGCTTTAAC  
CC-CTTGAAGAGTATCTCCTRCTTCAATCCTTCATTTCTATTGTCAGGCTRAAGTAAATT  
CTACTTGCKTACTAATTCATTTTTTATTTTCATACCCTACATCATT-----CC  
YG-CCCCATTTTGTTC-----

-----TGCAAGA  
TAG-----AAGA-TGGGAGATCTAAGGTAATTGAGAGT-GCTCTTC  
TA-AATCTCCARTTAT-----GGACAACAATGTAAAAG  
AAATACAGAGGAAAAAAGCATAAGCAACTCATGCAACCCAACTACAGTAAGATTTGCAT  
GCCACACAAGACTTAC--TTCCCTTT--GTAAATATGGA

>Ppe

CCATGCACCTTTGTGTACACTTGAC--CTTCAAATGAAGATAGGGTTATAGTTAGTGCAA  
AGACCAAGAAATCCATTGAATTATCTAGATTGATATCTT--CCTTGATCAAAAA-----  
-----CTCCACTTCATTTGGGAG-----A  
GTTCTAACCTTACTAAGCAAAGTAAAA--CAAAGTGGTTTTGGAATGGAATTTTAAACA  
GAATATT---TATATAGCACACTAGTTCAAAGAACTACATATGTGAAGCCTGGAGAAGGG  
AAGACTTAGGAAAGGAAG-----CAAGACAGTCATCTTCCAAGTATGTGAAGGACCAAC  
AC--GGAGTAAGGA-TTACATTTGTTCTAATGGACGCCAGAAGGCAAAATCAGAGGCAAT  
GGG---TGGATGTTTTGGAGAGGCAGATGATACATATGTAAGAAAGCCCAACTGGACCCA  
CCCGGACCCAACCTGCAACAAAGAAAGACTCTATCTTATCTGGGTCTCAAAG---TTTCC  
CTGAAATTTTCAAGTCTTATTGCTTCTTTTACCCTTTATTTGGACATTTTTCAGGCTCTGAC  
CC-CTTGAACATCTGTCTTACTTTAATCCTTCTTTCTATTGTCAGCTTGAAGTAAATT



GCTTCCCAAGACTTAC--TTTCCTTT--GTAAATATGGA

>Ptr

CCACGCATCTTTATGTATAGTTGAC--CTTCAAAGAAGATAGGGTTATAGTTAGCACAG  
AGGTCAAAGCATCCACTGAAATATCTAAATGGCCATTTT---CTTTGATCAAAAAA----  
-----TTCCTCTTCATTTGGGAG-----CA  
TTTCTAGCCTTAGTAAGCAAAGTAAAA--TGAACCTTGAGATTTGGAATAAAATTTTAAAA  
GAACATT---TATATAGAATTCTAGTTGAAAGAACTAGTTACATGAAGCCTGGAGAAGGG  
AAGACTTGGGGGAGCAAG-----CATGACAGTCATCTTCAA-GTATGTGAAGGACCTAT  
AGAAAGAAGGGGGA-TTAAATTTGTTCTAATGGACCCTAGAAGGCAGAACCAGAGGTGAT  
GGG---TGGATGTTTTGGAGAGGCAGATCATAATATGTAAGAAAATCCCCCTGGACCCA  
CCTGGACCCAACCTGCAACAGAAAAAGACTCTT---ATCTGTTTCTCAAAG---CTTCC  
CTGGCATTTTCAGGTCTTATTGCTTCCCTTACCCTTTATTGGGAGATTTTCATGCTCTGAC  
CC-CGTGAATTGCCTCTCCTGATCCAATCCTTCTTTCTATTGTCAGTTTGAAGTAAAT  
CTACTTGCTTACTCATTATTCTTTAGTTTTGACCCTACATCATCA-----CC  
CA--CCCCATTTTGTTC-----

-----TACAAGG  
TAT-----AGGA-TGGGGTATCTAAAGTAATTCAGAGT-GCTCTTC  
TA-AGTCTCCCCATTAT-----GGACACAAGTGTAAG  
AAATAATGAGAAACA-----GCTCATGAAACCCAAACACACAGAAA-----  
CATTGCAAGACTTAC--TTTCCTTT--GTAAATATGGA

>Vur

CCATGCATCTTTGTGTACAGTTGAC--CTTCAAAGAAGATAGTG---TAGTTAGCAGAG  
GGACCAAAGCTTCCATTGAATTATACAGATTGCTCTTTT---CCTTGATCAAAAAA---  
-----CTCTACTTCATTTGGGGG-----CA  
TTTCCAGTCTTAGTAAGGAAAGTAAAA--TGAACCTCGAGTTTTGAAATGAAATTTTAAAA  
GAGCATT---TATATAGCACCCCTAGCTGAAAGAACTTGTATGTGAAGCCTGGAGAAGGG  
AAGACTTGAGGGAGGAGG-----CATGATAGTCATCTTCAA-GTATGTGAAGGATCTAT  
ACAAGGAATAGGGA-CTAGATTTGTTCTAATGGACCCAGAAAGGCAGAACCAGAGGCAAT  
GGG---TGGATGTTTTGGAGAGGCAGATCATAATATAGATAAGAAAGCCCCCTGGACCCA  
TCTGGCCCCAACCTGCAACAGAGAAAGATTATTTCTTATCTGGGTCTCAAAG---CTTCC  
TTGAAATTTTCAGATCTTACTGCTTCCCTTACCCTTTATTTGGAGATTGCCATGTTCTGAC  
TC-CTTGAAGCAACTCTCTTGCCTCCATCCTTCTTTCTATTGTCAGCTTGAAGTAAAT  
CTACTTGCTCACTAACTCATTCTTCAGTTCTGACCATAACATCATCAGCCACCTCATCCCT  
CA-GCCCCATTTTGTCCC-----

-----TGCAACG  
AAT-----AGGA-TGGTGTCTCTAAAGTAATTCAGAGT-GCTCTTC  
TA-AATCTCCCAATTAT-----GGACACAAGTGTAAG  
AAATATAGAAAACCAAACATAAGCAACTCATGTAACCCAAACACAGAAAGGTTTGCAT  
GCTTCCCAAGACTTAC--TTTCCTTT--ATTAATATGGA

>human

CCATGCCTTCTTGTGGACCATTGAC--CTTCGAAAA-----  
-----  
-----  
-----  
-----  
-----







TCACATGGGGAAAT-GTGCCATTT-----CATGGT---AGGCTAAA----CTGTTATGC  
TTTTTAAAAATGTATATTAATAACCACCAACAAAAA---CATTTAACTAAACAA----  
-----GTATGTGCAAAATCACCAGCTGCGCATTGTTAAAATTTTGTTCAAATG-T  
ATAAATTTTATACATGTGCTAATA-----TCTTCTGCTTTTATGTTTCCTTTAGGTTTG  
TTTTATTTGGATACTTTTTT-CTCTTGATTTTGTGGCTGCCATATTTT--AATGTAAGT  
ATAGTATGTATCATT-----CTTATTCTCTTTTCTCCTCTTTAAATATTTACCTT  
ATTTTCTTTATATTTCCGATATTTGTCATTTCTAATCACACAGTAGAATGCTTTACATTC  
AAATAAC-----CAAG-TTTATTACCTTTGAATGAA  
CTCTATAAAATTCCACTAGTGTCCACTTGGTGGTGCATAAGACA--TAC--CTTAT---

-----  
-----  
GCTCTTGAATGATCTTTTCACTGCCTTCCTGTAGCACCAACTTGTTCTCTCGACCGAGCT  
CAGATCTGCATTCTTCTACTGAAGCTAGAAACCTGTTTTTTTCCACTTCTAT

>Rra

AAAAC--CTATTGAGAAAGACCTGAAACTGTAA-----GTA  
TTAT---GGGAAACCATAAGAA---GTCTCTACATTATTATAGGGGGGAAAAGGATTC  
ACACTTGGG-AAATTGAGTTATTTTGTGATTTTGGTCTCAGGCCAAA-----

-----GTATCACAA-----TCAAA  
CTCCATAAAATTCACCAATGTCCATTTGGTGCACACGAAACA--TAC--CTTAT---

-----  
-----  
GCTCTTGAATGATTTTTTCACTGCCTTCCNGTAGCACTAACTTGTTCTCTCGACCAAGCT  
CTGATCTGCATTCTTCTATTGAAGCTAGGAATCTATTTTTTCTCTACTTCTAT

>Cfu

AAAAC--CTATTGAGAAAGACCTGAAACTATAA-----GTA  
TTAT---GGGAAACCATAAGAA---GTCTCTAGATTACTATAGAAAAAAAGG-ATTC  
ACACTTGGG-AAATTGAGTTATTTTGTGATTTTGGTCTCAGGCCAAA-----

-----GTATAACAA-----TCAAA  
CTCTATAAAATTCACCAATGTCCATTTGGTGCACATGAAACA--TAC--CTTAT---

-----  
-----  
GCTCTTGAATGATTTTTTCACTGCCTTCCTGTAGCACTAACTTGTTCTCTCGACTAAGCT  
CTGATCTGCATTCTTCTATTGAAGCTAGGAATCTATTTTTTCTCTACTTCTAT

>Dg1

AAAAC--CTAATGAGAAACAAGTGAAGTTATAA-----GTA  
TGGT---GGGAAGCCATTAAAAC-----AACAAA--TATTC  
TCCCTTGGG-AAATTGAGACATTTTGTGATTTTGGTCTCAGGCCAAA-----

-----  
-----  
-----STATCCCAG--TTG-----  
-----AAATTCCACTAGTGTCCGCTTGGTGGTGTATGAGACA--TAC--CTTAT-----  
-----

GCTCTTGAATGATCTTTTCACTGCCTTCTGTAACACCAATTTATTCTCTCGGCCAAGCT  
CAGATTCACACTCTTCTACTGAAGCTAGAAACCTGTTTTTCTCCACTTCTAT

>Nty

AAAAT--CTAATGAGAAACATCTGAAGCTGTAA-----GTA  
TTGTATGCAAGAACTTCGAAAAG--GTGCTTACATTTGTACAGAAAACAAAAGTATTT  
TCCCTTGGG-AAATTGAGTTGTTTTGTGATTTGGGTCTCAGGCCAGA-----  
-----

-----GTATCACAG-TTCATTACCACTGCACTAA  
CTTCATGAAATTCTGCTAGTGTCCACTTGGTGGTGCATGAGACA--TAC--CTTAT-----  
-----

GCTCTTGAATGATCTTTTCACTGCCTTCTGTAGCACCAACTTGTCTCTCTACTAAGCT  
CAGATTTGCACTCTTCTACTGAAGCTAGAAATCTGTTTTTTTCCACTTCTAT

>Pta

AAAAT--CTAATGAGAAACAGAAGAAGCTATCA-----GTA  
TAGTATTTAAGAATCCACAAAAAAA--GTGTCTACATTTGTATAGAAAACAAAATATTC  
TCCCTACAG-AAATTGGGCCATTTTGTCACTTCTGGTCTCATGCCAGA-----  
-----

-----STATCACAG-GTTGTTACCTTTGG-TGAA  
CTTCATGAAATTCCACTAATTTCCACTTGGTGGTGCCTAAGACA--TAC--CTTAT---  
ATTTTTTAATTAATTTTTTAAAAATAGGTTTTTGGGTTTTTTTTTCCCAGTTACATGCAAT  
GAAAATTTTTAGCATTCATTTTTACAAG-----ATCCAAATTCT---TACCTTAT---  
GCTCTTGAATGATCTTTTCACTGCCTTCCNGTAGTACCAATTTGTTCTCTCGACCCAGTT  
CAGATTTGCACTCTTCTACAGAATCTAGAAATCTATTTTTTCTCCACTTCTAT

>Dgo

AAAAT--CTAATGAGAAACAGATGAAGCTATCA-----AGTA  
TTGTATTTAAGAATCCACAAAAAAA--GTGTCTACATTTATATGAAAACAAAATATTC  
TCCTTTGGG-AAATTGGGCCAYTTTGTCACTCCGGTCTCATGCCAGA-----  
-----

-----STATGACAG-TTTGTTACCTTTGG-TGAA  
CTTAATGAAATTCCTAATGTCCACTTGGTGGTGCATAAGACA--TAC--CTTAT---  
ATTTTTTAATTAATTTTTTAAAAA--GTTTTTTTGGCGTTTTTTCCCAGTTACATGTCAT

GAAAATTTTTAGCATTCAATTTTTATAAG-----ATCCAAATTCT---TACCTTAT---  
GCTCTTGAATGATCTTTTTCACTGCCTTCCTGCAGCACCAATTTGTTCTCTCGATCCAGTT  
CAGATTTGCACTCTTCTACTGAAGCTAGAAATCTATTTTTCTCCACTTCTAT

>Scr

AAAAC--CTAATAAGAAACAGATGAAGCTAKCA-----GTA  
TTGTATTTAAGAATCCACAAAAAATGTGTCTACAGTTATATAGAAAACAAAAATATTC  
TCCCTTGGG-AAATTGGGCCATTTTGACATTCTGGTCTCATGCC-----

-----AGACATAG-TTTGTTACCTTTAG-TGAA  
CTTCATGAAATTCCTAATGTCCACTTGGTGGTGCATAAGACA---TAC--CTTAT---  
ATTTTTAAATTAATTTTTAAAAA-----TAGT--CACGTCAT  
GAAAATTTTTAGCATTCAATTTTTACAAG-----ATCCAAATTCT---TACCTTAT---  
GCTCTTGAATGATCTTTTTCACTGCCTTCCTGTAGCACCAATTTGTTCTCTCGACTCAGTT  
CAGATTTGCATTCTTCTACTGAAGCCAGAAATCTATTTTTCTCCACTTCTAT

>Mfa

AAAAT--CTAATGAGAAACAGATGAAGTTATCA-----GTA  
TTGTATTTAAAAATCCACAAAAAG--GTGTCTACATTTGTATAGAAAACAAAAATATTC  
TCCCTTGAG-AAATTGGGCCATTTTGTCATTCTGGTCTCATGCCAGG-----

-----CTATC--AG-TTTGTTACCTTTGG-CGAA  
CTTCATGAAATTCCTAATGTCCACTTGGTGGTGCATAAGACA---TAA--CTTTT---  
---TTAAATTAATTTTTAAAAA--TAATTTTTTGAGTTTTTTTCCAGTTACATGTCAT  
GAAAATTTTTAGCATTCAATTTTTACAAG-----ATCCAAATTCT---TACCTTAT---  
GCTCTTGAATGATCTTTTTCACTGCCTTCCTGTAGCACCAATCTGTTCTCTCGACCCAGTT  
CAGATTTGCACTCTTCTACTGAAGCTAGAAATCTATTTTTCTCCACATCTAT

>Bil

AAAAT--CTAATGAGAAACAGCTGAAGCTATAA-----ATA  
TTGAATAAAGGAAGTCATAAAAAG--GAGTCTACATTTGTAGAGAAAACAAAAACATTC  
TCCTTTTCG-AAATTG---CA-----CCTTTTYGGTCTGTCAGACYA-----

-----TCATAG-TTTGTTACCTTTTCATGAA  
TGCCACAAAATTTCACTACTGTCCACTTGGTGGTGCATGAGACA---TAC--CTTAT---

GCTCTTGAATGATCTTTTTCACTGCCTTCCTGTAGTACCAACTTGTCTCTCGACCCAGTT  
CAGATTTGCATTCTTCAACTAAAGCTAGAAATCTATTTTTCTCCACTTCTAT

>Pgu

AAAAT--CTAACGAGAAACAGCTGAAGTTATAA-----ATA

TTGAATACTGGAAATCACAAAAAAG--ACTTCTATGTTTGTAGAAAAAAGAAAAACATTC  
TCCCTTGGG-AAATTG--CA-----TCATTTTGGTCTCAGTCCAA-----

-----CTGTACAG-TTTGTTACCTTTTCATGAA  
TGCCACAAAATTTATCACTGTCCACTTGGTGGGGCACAAGACA--TAC--CTTAT---

GCTCTTGAATGATCTTTTCACTGCCTTCCTGTAGTACCAACTTGTTCCTCTCGACTCAGTT  
CAGATTTGCATTCTTCAACTAAAGCTAGAAATCTATTTTCTCCACTTCTAT

>Iso

AAAAT--CTAAAGAGAAACAGCTGAAGTTATAA-----ATA  
TTGAATACTGGAAATCACAWAAAG--ACTTCTATGTTTGTAGAGAAAAACAAAAACATTC  
TCCCTTGGG-AAATTG--CA-----TCATTTTGGTCTCAGTCCAA-----

-----CTGTCATAG-TTTGTTACCTTTTCATGAA  
TGCCACAAAATTTATCACTGTCCACTTGGTGGGGCACGAGACA--TAC--CTTAT---

GCTCTTGAATGATCTTTTCACTGCCTTCCTGTAGTACCAACTTGTTCCTCTCGACTCAGTT  
CAGATTTGCATTCTTCAACTAAACTAGAAATCTATTTTCTCCACTTCTAT

>Tro

AAAAT--CTGATGAGAAACAGCTGAAGCTGTAA-----TTA  
CTGTATACAGGAAGCCGCAAAAAG--GTGTCTACATTTGTGCTGAAAACAAAAATATTC  
TCCCTTGGG-AAATTGAGCCATTTTCTGTTTTTGGTCTCAGGTCAGA-----

-----CCATCCCA--TTCATTACCTCTGCAGGAA  
CTCCATGAAATTCCACTAATGTCCACTTGGTGGTGCATGAGACA--TAC--CTTAT---

GTTCTTGGATGATCTTTTCACTGCCTTCAGCTGCACCAACTTGTTCCTCTCGTCCAAGCT  
CTGATTTGCACTCCTCTACCAAAGCTAAAAATCTGTTTTTCTCCACTTCTAT

>Ppe

AAAAT--CTAACGAGAAACAGCTGAAGCTATAA-----GTA  
TTGTATACAGGAAGCCAC-AAAAC--GTGTCTACATGTGTACAAAAACAAAAATATTT  
TCCCATGGG-AAACTGAGCCATTTTGCATTTTGGTCTCAAGCCAGA-----



-----  
-----  
GCTCTTGAATGATCTTTTCACTGCCTTCCTGTAGCACCAACTTGTTCTCTCGACCAAGTT  
CTGATTTGCACTCTTCTACTGAAGCTAGAAATCTGTTTTTCTCCACGTCTAT









-----  
-----  
---CACTTAGGAAGGTGAGGCGTGGAGATGTTGCACTTTATGCCACTGAAGGGAGA-ACC  
-----  
-----

-----CATAACAAGGGT-CCACTG----AAGGA  
AAAGACTCCCAA--CTACTCCTTTA--GAATTAATTATTACAGAGTACAAGGAGAA  
CTGAGCTAGCATCAGCTATCAACTCCCAGTTCATTTTT-CTTAAATCGCTGGACCCAGTT  
GGA-GATTCTGGTCCCTGAGGAAACCTTTCTGCTGTCCTTGGTGCTACTGTAGTAGTAGA  
TTATTTGAT-GTGGTTTGCTGCTGAAACTTTGAAGCTGTCCAAAGCAAG-----  
-----

-----CATGTGCCTCCT---AATCCAATTTGGCC  
ACAAACTTAC--CTCCCGATTGTCGGCCACGATCACAA

>Rra

TTAACCTTCTCCACATCTTTTCCTTGTCTCTGAAA--CTTAATTCAA-----AAAGTCAA  
TGTTAGCAATAAGAA-CAATCTAACAGCA--TTTTTGCGGACTGTGGAGTCATAGACAT  
GGGTTTGGGGGAAGGAATGGATAAGAAT---GGGGCAGCAGGATGGCACAGGTGAAAAGA  
GCCACTGCT-----  
-----ACCACTTGGGCAGTACCATGGATCATCGTAAGGTGATTCACTA-----  
---ATGAAAGCAACTACA-AAAACCACTCCAGTATCCTTGTCAAAGAAAACCTG--AAGG  
GGGCACCAAGATTTGGACAGCACTAAAAAGT---ACACAACAACCCAAATGGACAGAAAT  
---CACTTAGGAAGATGAAAGGTGGAGAGGATACTCT---GCTACTGAAGGGAGAATTC  
-----  
-----

-----ACACCAAGGACT-CCACTACTTCTTCC-  
-----CTACTTCTTAA---TAAT-----GGATCAAGAA  
TTATTCTAGCATCAGCTATCAAAATCTAACTAATTTTT-CTTAAATAATTAAACCTAACT  
TGAAGAA----TCATTGAGAA-CCCTTCTGCTGTCCTTAGTGCTACTGTCTACAAAAT  
TTGCTTGGT-TTGGCTTATTGCTCCAGTTTCTAAATTTGTCCTGAGAAAATGAAGTAACCC  
CAAAGTAAGCATGGAGCCCAAATCAAAAAGCAAAGCT-----  
-----

-----CTAATGGAAGC----ATGAGCATTTGGTC  
TGGGACCTAC--CTCCCGATTATCTGCCACGATGACAA

>Cfu

TTAACCTTCTCCACATCTTTTCCTTGTCTCTGAAA--CTTAATTCAA-----AAAGTCAA  
TGTGAGCAATAAGAA-CAATCTAACAGCA--TTTTTGAGGACTCTGGAGTCATGAACAT  
GGGTTTGGGGGAAGGAATGGACAAGAAT---GGGGCAGCAGGATGGCATAGGTGAAAAGA  
GCCACTGCT-----  
-----ACCACTTGGTTCAGTTCCATGGGGCATCGTAAGGTGATTCACTA-----  
---ATGAAAGAAACTGCA-AAAACCACTCCAGTATACTTGCCAAAGAAAACCTG--AAGG  
GGGCACCAAGATATGGACATAACTAAAAAGT---ACACAACAACCCAAATGGACAGAAAT  
---CACTTAGGAAGATGAAAGGTGGAGAGGATACTCT---GCTGCTGAAGGGAGAATTC  
-----



-----  
-----  
-----  
-----ACGCCAAGGGGTTTCATGGGTC-CGCTGA  
AAGAAGACTTTCC--CTACTTCTCTA---GAATCAAATTGTTTCACAGAATGCAATGAGAA  
GTAAGCTAGCACCAGCTATCAACGTCCACTTCATTTTTT-TTTAAGTAACTGAACCCAACT  
AGA-GATTATAGTCACCAGGAAAACCTTTCTGCTGTCCTTGGTGCTACTGTCT-CAGATG  
ATTACTAGATGTGGTTTGTGGCTGATGCTTTTAAACTCTTGTGAGAGAATGAAATAT-CC  
CAAAGCAAACACATGCTCCAAATTCCTTT-----CT---TCAATTTCTCCTC---GGGGC  
AGCTAGATGGCGCAGTGGATAGAGCACTGGCCTTGGACTTAGGAGGACCTGAGTTCAAAT  
CCAGCCTCAGACAGACACTTGATATGTTCTATCTGTGTGACCTTGGGCAAGTCACTTAAT  
CCCAAATTGCCTCTCCAAAAAAAAGAAG---CCAATTTCTCCTC---GTGGGAGTTTAGCC  
ATGAGCTTAC--CTCGCGATTGTCCGCCACGATCACAA

>Pta

TTAACTTTCTCCACATCTTTTCCCTGCCTCTGAAA--CTGAATTTAAAGAGCAAAGTCAA  
TGTTAGCAATCCGAA-TAATCAG----CG---TTCTTTTCGGATTTTGGAGTCGTGAACAT  
GGATTCAGAGGACGGCACGGACAGGAAT-----

-----  
-----  
-----  
-----CACTTAAGAAGTTGAGGAGTGGGGAGGTC----ACTATGTCACTGTAGGAA--GCGC  
---CTTTCCCTACTTCTTTATTTTTT-CTCTACTTTTTTTTT-----  
-----TTAATTTTTTAAAATGTTTTTTT  
TCTAAGGCAATTAGGATTAAGTGACTTGCCAGGGTCAAAAAGTAG-----GC  
TCATCTTTGAACTCAGTCTTCTGATTTTCAGAGCTGGTGCTCT-----  
-----ATCCAC-----  
-----TGCGCCATCTAGTTACCCTTCCCC-----

-----  
-----  
-----  
-----CTACTTCTTTA--GAATTAACCTGTTTCATAGAATGCAATGAGAA  
TTAACTTGCATCAGCTATCAACTTCCAAGTCATTTTTT-CTTAAATAATGGAACCCAAAG  
AGA-GATTATAGTCACTGAAGAAATTTCCCTGCTGTCCTTGGTGCTACTGTCTTT-----  
-----GATGTTTTGCTGTTAATGCCTTTCAACTGTTGGGAGAGAATGAAATAA-CC  
T-AAGCAGGCACATGCCCCAGATCCCCTT-----CT-----

-----  
-----  
-----  
-----CTAACGTCCCC----ATGGAAGTTTGGCC  
ATGAACTTAC--CTCGCGATTGTCCGCCACGATCACAA

>Dgo

TTAACTTTCTCCACATCTTTTCCCTGCCTCTGAAA--CTGAATTTAAAGAGCAAAGTCAA  
TGTTAGCAATCTGAA-TAATCAAACAGTG--TTCTTTTCGGATTCTGGAGTCATGAACAT  
GGATTCAGAGGACGGCACAGACAGGAAT-----

-----  
-----  
-----  
-----CACTTAGGAAATTGAGGAGTGGGGAGGTC----TCTATGTCACTGTAGGAAGT--GC  
---CTTTCCCTACTTCTTTATTTTTTCCCTCTACTTTTTTT-----  
-----AATTTTTTAAATTTTTTTTTT  
CGAG-----TTAAGTGACTTGCCAGGGTCACTGCTAG-----AT  
CCAGATTTGAACTCAGTCTCCTGACTTCAGGGCTAGTGCTCT-----  
-----ACCCAC-----  
-----TGTACCATCTAGCTACCCTTGCCCC-----

-----  
-----CTACTTCTTTA--GAATTAACTTGTTTCATAGAATGCAATGAGAA  
TTAAATTTGCATCAGCTATCAATTTCCAAGTCATTTTT-CTTAAATAATGGAACCCAAAG  
AGA-GATTACACTCACTGAAGAAATTTTCTG-TGTCCTTGGTGCTACTGTCTAGATGAA  
TGTTTG---TTGTGTTGTTATTAATGCCTTTCAACTGTTGGGAGAAAATGAAATAA-CC  
TAAAGCAAACACGGGCCCCAGA---TCTT-----CT-----  
-----

-----CTAACGTCCCC---ATGGAAC TTTGGCC  
ATGAACTTAC--CTCGCGATTGTCCGCCACAATCACAA

>Scr

TTCACTTTCTCCACATCTTTTCTTGCCTCTGAAA--CTGAATTTAAAGAGCAGAGTCAA  
TGTTTRGCAATACGAA-TAATTAAA--GTG---TCCTGTCAGATTCCGGAGTCATGAACAT  
GGATTCAGAGGACGGCATGGACAGGAAT-----  
-----

---CACTTAGGAAGTTGAGGAGAGAGGTCATT-----ATGCCACTGAAGGAA---CC  
---CTTCCCTACTTCTTTATTTTTTCTCTACTTCTTTTT-----

-----AAATTTTTTTTT  
CCAGAAGCAATTRGGGTTAAGTGACTTGCCAGGGTCACACAGCTAG-----GC  
CGAGATTTGAACTCAGGTCTTCTGACTTCAGGGTCGGTGCTCT-----  
-----ATCTAC-----

-----TGCACCATCTAGCTGCCCTCC-----  
-----

-----CTACTTCTTTA--GAATTAACTTCTTCATAGAATGCAATGAGAA  
TTAAGCTTGCATCAGCTATCAACTTCCAAGTCATTTTT-CTTAAATAATGGAACCAA-G  
AGA-GATTACARTCACTGAAGAAATTTTCTGCTGTCCTTGGTGCTA-TGTCTAGACGAG  
TGTTTG---ATGTGTTGTTGTTAATGCCTTTCAACTGTTGGGAGAGAATGAAATAA-CC  
TAAAGCAACCATGTGCCCCAGATCCCCTT-----CT-----  
-----

-----CTAATGTCCCC---ATGGAAC TTTGGCT  
ATGAACTTAC--CTCGCGATTGTCCGCTACAATCACAA

>Mfa

---CTTCTCCACATCTTTTCTTGCCTCTGAAA--CTGAATTTCAAGAGCAAAGTCAA  
TGTTAGCAAGAAGAA-TAATCAAACAGTG---TTCCTTTCGGACTCTGGAGTCACGAACGT  
GGATCCGGAGGACGGCATGGATAGGAAT-----  
-----

---CACTTAGGAAGTTGAGGAGTGAGAGGTCCTCTCTATGTGACTGAAGGAA---GC  
---CTTCCCTACTTCTTTATTTTTTCCCTTACTTCTTTTTTTTCTTTTTTATCCTTATT  
TTTTATTTGTGAAAATTCTTAAAAAAGAAAATGAGAAGAATTTAAAATTTTCAATTT  
C-AGTATAACATCATCAATATAGTGTTGC-TTCTCTCAATAATACAG-----  
-GAAAATTATAGAACCATGCTTTGATTTAAAGCTACCCTCTCTTTTTTTCTTTTTTTTAA  
TTAAAAGCTTTTTATTTACAAAACATATGAGTGATTTTTCTACATTGACCTTTGCAAAC  
TTTTTTTTTTGTTCCATGCTTTTCCCCTCCTTCCCCCACCCTTAGTACATGCTA  
AATATATTAAATTATATGACAAATTTCCC-----  
-----

-----TACTTCTTTA--GAATTAACTTGTTTCATAGAATGCAATGAGAA  
TTAAGTTTGCCTCAGCTAGCAACTTCCAAGTCATTTTT-CTTAAATAATGGAACCCAAAG

AGA-GATTACAGTCACTGAAGAACTTTCTGCTGTCCTTGGTGCTGCTGTCT-CAAATG  
AGTGTGTTGATGTG--TTGTGGTTAATGCCTTTCAACTGTTGTGAGAGAATGAAATAA-TC  
TAAAGCAAGCACGTGCCCCAAATCCCCTT-----CT-----

-----CTAATGGCCCC----ATGGAAC TTTGGCC  
ACGAACTTAC--CTCGCGATTGTC-----

>Bil

TTAACCTTCTCCACATCTTTCTGCTGCTGAAA--CTTAAA----AGGTAAAGTCAA  
TGTTAGCA-TAAAAATA-TCAAACA-GT--TTTTTGAGGACTCTAGAGTCATGAACTG  
GGGATTGGGGAGTGCATGGACAGGAAT-----

---CACTTAGGAATATGAAGAATGGAAAGGTC--GTAGTGTGCCATTAAA-----CCC

-----ACACTGAGGAGTTCATGGGTTCCCAGAA  
GGAAGACTTTCT--CTATTTCTTTA--GAATTRAGTTGTTACAGAATGTAATGAGAA  
TAAAGCTAGTATCAACTTCCACTT-----CATTGTT-CTT-AATAGCTGAACCCAACT  
AGA-GATTACAGTCATCAAAAAGCCTTTATGCTGATCTTGGTGATACTGTAA-TAGGTG  
GTCATTTAATATGAGTTGCTGCTAATATTTTAAACTGTTGTGGGAGAATGAAATAA-TC  
CAAAGCGAGCACATTCCCCAAA--TCTTT-----CT-----

-----CCAATTTCTC-----ATGGGAGTTTGACC  
ATGAACTTAC--CTCACGGTTGTCTGCCACAATCACAA

>Pgu

TTAACCTTCTCCACGTCTTTCTGCTGCTGAAA--CTTAAA----GGATAAAGTCAA  
TGTTAGCAATAAGAA----CAAACA-GT--TTTTTGAGGACTCTAGAGTCATGAACCA  
GGGATTGGGGAGCGCATGGACAGGAAT-----

---CAATTAGGAATATGAAGAAGGAAAGGTC--ATATTGTGTCATTAAA-----CCC

-----ACATAGAGGAGTTCATGGGTTACCGAA  
GGAAGACTTTCT--CTATTTCTTTA--GAATTAATTTGTTACAGATTTGTAATGAGGA  
TTAAGCTAACATCAACTCCCAATT-----CATTTTTTCTTAAATAACTGAACCCGACT  
AGA-GATTACAGTCATCAAGAAAACCTTTATGCTGATCTTGGTG-ATTTGTCA-TAGATA  
AGTATTTAATGTGATTTATTGCTAATATTTTAAACTGTTGTGGGAGAATGAAATAA--C  
CAAAGCAAGCACATTCCCCAAATCTCTTT-----CT-----



-----  
-----  
-----CCAATTTGCTC-----ATGGGAGTTTGACC  
ACGAACTTAC--CTCACGGTTGTCTGCTACAATCACAA

>Iso

TTAACCTTCTCCACGTCTTTTCCTTGTCTCTGAAA--CTTAAA-----GGATAAAGTCAA  
TGTTAGCAATAAGAA-----CAAACA-GT--TTTTCGAGGRCTCTAGAGTCATGAACCA  
GGGATTGRGGGAGWGCATGGACAGGAAT-----  
-----  
-----

---CAATTAGGAATATGAAGAAGGGAAAGGTC--ATATTGTGTCATTAAA-----CCC  
-----  
-----  
-----

-----ACACAGAGGAGTTCATGGGTTTACCGAA  
GRAAGACTTTCT---CTATTTCTTTA---GAATTAAATTGTTTCACAGATTGTAATGAGAA  
TTAAGCTAACATCAACTCCCAATT-----CATTTTT-CTTAAATAACTWSACCCRACT  
AGA-GATTRCAGTCATCAAGAAAACCTTTATGCTGATCTTGGTG-ATTTGTCA-TAGATA  
AGTATTTAATGTGATTTGTTGCTAATATTTTTTAACTGTTGTGGGAGAATGAAATAA--C  
CAAAGCAAGCACATTCCCCAAATCTCTTT-----CT-----  
-----  
-----

-----CCAATTTGCTC-----ATGGGAGTTTGACC  
ACGAACTTAC--CTCACGGTTGTCTGCTACAATCACAA

>Tro

TTAACTTTCTCCACGTCTTTTCCTTGTCTCTGAAA--CTTAATTTCAAGA-----  
-----TAAGCA-CAATCAAGCAGTG--TTTTTGGAGACCCTGGAATCATGAATGT  
GGGTTTGGGGGGTGCACGGAYAGAAAT-----  
-----  
-----

---GCCTTGGAAGATG-----AGAACCT  
-----  
-----  
-----

-----TCMCCAAGAAGGTCATGGGTCCACTGAA  
AGAACACTTTGT---CTACTTC-----ATTAATTTGTTTACAGAATGGAATGAGAA  
TTAAGTGGGCACCAGCTATCAATTCCYGCTTCATTTTT-CTTAAATAACAGAACCCAACT  
AGA-G-----TCACCTAGGGAAYCTTTCTGCTGTCCATGGTGCTAYSACT-CAGATG  
ATCATATGAT-----AAGCTGTTGGGAGAGAAAYGAAATAACCC  
CAAAGCAAACACATGCTCCAATCTCTTY-----CT-----  
-----  
-----

-----CTAATTTCTC-----AGAGGAGT-GGATA

GAGAGCTTAC--CTCCCGATTGTCTGCTACRATCACAA

>Mr o

TTAACTTTCTCCACGTCTTTTCCTTGTCTCTGAAA--CTTAATTTAAAGAGTAAAGTCAA  
TGTTAGCAATAAGAA-TAATTAACAGTG---TTTCTGAGGACTCTGGAGCCATGAACAT  
GAGTTTGGGGGAGGGCAGGGATAGATAT-----

---CACTTGGGAAGATAAGGAGAGGAGAGGTCACACTATAT--CACTGAAGGGAGAACCC

-----CATCAAGGAGCTTGATGGGTCCACTGAA  
GGAAGACTTCCT---CTACTTCTTTA---GAATTAATTTGTTTGTAGAATGGAATGAGAA  
TTAAGTTAGCATCAGCTCTCAATTCCCAATTCATTTTT-CTTAAATAACTGAACCCAACT  
AGA-GAGTATAGTCCT-GAGGAAACCTTTCTGCTGTCCTTGGTGCTACTTCCT-CAGATG  
ACTATTTGATGTG---ATTGCTAATGCTTTTAAACTGTTGTGAGAGAATGAAATA-CCC  
CCAAGCAAACACATGCCCAAATCTCTTT-----CT-----

-----CCAATTTCCCC---TTGGGAGTTTGGCT  
GTGAACTTAC--CTCACGATTGTCTGCCACTATCACGA

>Ptr

TTAACTTTCTCCACGTCTTTTCCTTGTCTCTGAAA--CTTAATTTAAAGAGTAAAGTCAA  
TGTTAGCAATGAGAA-TAATTAACAGTG---TTTCTGAGGACTCTGGAGCCATGAACAT  
GGGTTTGGGGGAGGACATGGACAGAAAT-----

---CACTTGGGAAGATAAGGAGATGAGAGGTCATACTGTAT--CACTGAAGGGAGAACCC

-----CATCAAGGAGCTTGATGGATCCACTGAA  
GGAAGACTTCCT---CTTCTTCTTTA---GAGTTAAATTTGTTTGCAGAATGGAATGAGAA  
TCAAGTTAGCATCAGCTCTCAATTCCCAATTCATTTTT-CTTAAATAACTGAACCCAACT  
AGA-GACTATAGTCTT-GAGGAAACCTTTCTGCTGTCCTTGGTGCTACTTCCT-TAGATG  
AATGTTTGTGATGTG---ATTGCTAATGCTTTTAAACTGTTGTGAGAGAATGAAATA-CCC  
CCAAGCAAACCCATGCCCAAATCTCTTT-----CT-----

-----CCAATTTCTT---TTGGGAGTTTGGCT  
GTGAACTTAC--CTCACGATTGTCTGCCACTATCACGA

>human

TTAACTTTTCCAGATCTTTTCCTTGCCTCTGAAA--CTTAACAA--TTTTAAATGGCAG



**MARKER 85**

>RTESINE2

-----  
-----  
-----  
-----CCTGACTTTTGTGTC-----  
-----  
-----  
-----  
---TTGCCACTGGA-CTTCGATGACTCTGGAAGAGAGAGTGAGGCTGA-----TGAC  
TTTGTGCAACTCTGCCTCACTTAAATCCAATTTCATGCGCAAGTCAAGACA-TCACCCCAT  
GA---TGTCATTGGTCCTCTTC---GAAAACG-----  
-----  
-----  
---AAGGACGAACAACAACAACAA-----  
-----

>WSINE1

-----  
-----  
-----  
-----  
-----  
-----  
-----  
-----  
-----  
-----  
-----GAGGGGCAGCTAGGTGGTGCAGTGGATAGAGCACC  
AGCCCTGGAGTCAGGAGGACCTGAGTTCAAATCCAGCCTCA-----GACTTACTAG  
CTGTGTGACCCTGGGCAAGTCACTTAACCCCAATTGCCTC---AAAAAAAAAAAAA---  
-----  
-----

>WSINE1

-----  
-----  
-----  
-----T  
TTTTTTTTTTTTTTG-----AGGCAATTGGGGTTAAGTGAAGTGGCCAG  
GGTCACACAGCTA-----GTAA-GTGTCTGAGGCTGGATTTGAACTCAGGTCTCCTGA  
CTCCAGGGCTGGTGTCTATCCACTGCACCACCTAGCTGCCCTC-----  
-----  
-----  
-----  
-----

>Mdo

TTGGAAGCAGAGAAGATGGTCAGTAC--CTAAAACCAAACAGGAGAGAAA--GG-TGGG  
ACCCTTCGC-----CGAGC-----TTCCCATCTCTTCCCGCCTTGGACCTGGGGGGG  
GGTTGAGGGTGGGCCACAGGACTGCTGTTTGTGTGGAGGGGC---AGTGGTCC--GCTC  
T---CTCCTTTCC-----  
-----

-----  
-----  
-----  
-----  
-----  
-----  
-----

-----GAGGAGGCACCCAC--CTTGCGATTGTGGCAG  
AACTCGTAACCTTCCGGCTTACACTCGTG

>Cfu

TTAGAAGCAGAGAATATGGTCAGCAC--CT-ACACAAAAATAGGAGAGAAA--GGATAGG  
TA-----TGGAGC--TTCATTTTCCCATTCATTCT-----  
-----CTCGGTGATCATTGTTTGCTGCTGAGGGTA---AGCAATCGAATTCT  
TCTCCTCCCTTGCTTTGCTCTACAAGAGTCTTGGGCAA-----

-----  
-----  
-----  
-----  
-----  
-----  
-----

-----CCGGCACCTAC--CTTGCGATTGTGGCAG  
AACTCATAGCCTTCTGGCTTGCATTCATG

>Dgl

TTAGAAGCAGAGAAGATGGTTAGCAC--CT-GAACAAAAAGAGGAGAGAAA--GGACGAA  
CG-----TTTAGC--TTCATTTTCCC-----TGTTGGCTTCCCACCTTGGACC  
C-----TGGTGCTTGTAATTGCTGTTTGTGTTGAGGGGA---AGCTACTAAACTCC  
-CTTCCCCTTTGCTCTGCTCTACAAGACC--TACCTC-----CTAAGTGC----

-----  
-----

---GTACCTAC-----AGAACTCTGGAGGAGAGAGTGAGGCTGA-----TGAC  
TTTTCAAAGCTCTGTCTCACTTAAATCCAATTCTCGAGTCAAGACATCCCCCTCCT  
GA--CATCACTGGTCTTCTTT--AAGAAGGAAGGACGA-----GGATAGAGCACT  
GGCCCTGGAGTCAGGAGTACCTGAGTTCAAATCCAGCCTCAGACACTTAACTCACTAG  
CTGTGTGACCCTGGGCAAGTCACTTAACCCCAATTGCCTCACTAAAAAAAAAAAAAAAAA  
A--AAGAAGGAAGGACGAACAAT--AACAAAGGTACCTAC--CTTGCGGTTCGTGACAG  
AACTCATAACCTTCCGGCTTGCACCTCATG

>Pta

TTAGAAGCAGAGAAGATGGTTAGCAC--CT-AAACAAAAACAGGTTAGAGA--GGATGGA  
CAC-CTGGATTTTCTTTGCCGTTCACTCTCCCACTCCCTGTTGGGTTCCCACCTTCAAAG  
C-----TGTTTCTCTTGCTGTTATTTGTTGGTGAGGGAA---AGCTACCAAACCTCT  
-CCTCCCCTTTGCTCTGCTCTACAA-----GAGCTC-----TGGTACCCAAGTC----

-----  
-----

---GTAGGGATGGA-TCTTAAGGACTCTGGAGGAGAGACTAAGGCTGA-----  
-----CTCAAATCCGATTCACACACAACCCAAGACAT-CCCTCCCT  
GA--TGTCACCTGGTCCTTCTC-----

-----  
-----  
-----AAGAGCAAAGAATGCAC-----AACAGAGGGACCTAC--CTTGCGGTTATGGCAG

AATTCATAGCCTTCCTGCTTGCACTCGTG

>Dgo

TTAGAAGCAGAGAAGATGGTTAGCAC--CT-AAACAAAAACAGGATAGAGA--GAATGGA  
CAC-CTGGATTTTCTTTGCTATTACCCTCCCACTCCCTGTTGGGTTCCACCTTCAAAG  
C-----TGTTTTCTCTTGCTGTTATTTGTTGGTGAGGGAA---AGCTACCAAACCTCT  
-CCTCCCCTTTGCTCTGCTG---AGAATCTAGAGCTC-----TGGTACCCAACCTC-----

-----  
-----  
-----  
---GTAGGGATGGA-TCTTAAGGACTCTGGAGGAAAGACTAAGGCTGA-----CAA-  
-----CTATCTCACTCAAATCCGATTACACACAACCCAAGACATCCCCTCCCT  
GA---TGTCACTGGTCCTTCTC-----

-----  
-----  
---AAGAGCAAAGAATGCAC-----AACAAAGGTACCTAC--CTTGCGATTATGGCAG  
AATTCATAGCCTTCCTGCTTGCACTCGTG

>Scr

TTAGAAGCAGAGAAGATGGTTGGCAC--CT-AAACAAAAACAGGATAGAGA--AGTTGGA  
CAC-CTGGATTTTCTTTGCTATTACCCTCCCACTCCCTGTTGGGTTCCACCTTCAA  
C-----TGTTTTCTCTTGCTGTTATTTGTTGTTGAGGGAATCCAGCTACCAAACCTCT  
-CTTCCCCTTTGCTCTGCTCTACAAGAGTCTAGGGCTC-----TGGTACCCAAGGT-----

-----  
-----  
---GTAGGGRTGGA-TCTTAAGGACTCTGGAGGAGAGACTGAGGCTGA-----CAAT  
A-----GTACAATCTCAAATCTGATTACACGCAACCCAAGACATCCCCTTCT  
GA---TGTCACTGGTCCTTCTC-----

-----  
-----  
---AAGAGCAAAGAATGCAC-----AACAAAGGTACCCAC--CTTGCGATTATGGCAG  
AATTCATAGCCTTCCGGCTTGCACTCATK

>Mfa

TTAGAAGCAGAGAAGATGGTTAGCAC--CT-AGACAAAAACAGGATGGAAA--GGATAGA  
CAC-TGAGATTTTCTTTGCTATTACCCTTCCCACTCACTGTTGGGTTCCCATCTTCAAAG  
C-----TAGTTTTCTTTGCTGTTGTTTGTGTTGAGGGAA---AGCTACCAAACCTCT  
-CCTCCCCTTTGCTCTGCTCTACAAGAGTCTTGGGCTC-----TGGTATCCAAC-----

-----  
-----  
---TCGGGGT-----GGGACTCTGGAGGAGAGAGTAAGGCTGA-----CAAC  
T--GTAT-ACTCTATCTCACTCAAATCTGCTTCATTTGCAACCTAAGACATTTCTTCT  
GT---TGTCATTGGTCTTTTTTC-----

-----  
-----  
---AAGGTAT-----AACAAAGGCACCTAC--CTTACGATTATGGCAG  
AATTCATAGCCTTCCTGCTTGCACTCATG

>Bi1

TTAGAAGCAGAGAAAATGGTTAGCAC--CT-AAACAAAAACAGAAGAGAAAGAGGATGGA  
CACTCAAGCTTTACTTTCCCTTTACCCTCCCATTCACAGTTAGGTT-CTACCTTGGATG  
C-----TGATAGTTCTTGATATTATTTGTTGTTGAGGGAA---AGCTACCACACTCT  
-CCTCTCCTTTGCTGTGCTCTACAAGAGTGTGGGCTC-----TTGCACCCAACAT-----

-----  
---GTAGGTATATACCCTACAGGACTCTGGAGGAGAGAGTAAGGCTGA-----AGA-  
-----CTGCCTCACTTAAATTC AATTCACACATAAGCCAAGAC-TCACCCTCAT  
GG---TGTCATCATTCTCTTC-----  
-----

---AAGAATGAAGGATGAACAAT---AGCAAAGTCCTTAC--CTTGCGATTGTGGCAG  
AACTCATAACCTTCTGTTTGCACCTCATG

>Pgu

TTAGAAGCAGAGAAAATGGTTAGCAC--CT-AAACAAAAACAGAAGAGAAAGAGGATGAA  
CACTTAAGCTTTACTTTCCCTTTTACCCTCCCATTCACAATTAGGTT-CTACCTTGGACC  
C-----TGATTGTTCTTCAGGGAA---TGCTACCATAACCCT  
-CCTCTCTTTTGTCTATGCTCTACAAGAGTCTTGGGCTC-----TTGCACCCACCTT-----  
-----

---GTAGGTACATAACCCTACAGGACTCTGGAGGAGAGAGTAAGGCTGA-----AGAC  
T-AGTGCAACTCTGCCTCACTTAAATGTAGTTACACCTAAGCCAAGAC-TCACCCTCAG  
GG---TGTCATCGTTCCTCTTC-----  
-----

---AAGAAGGAAGGATAAACAAC---AGCAAAGTACTTAC--CTTGCGATTGTGGCAG  
AACTCGTAACCTTCTGCTTGCACCTCATG

>Iso

TTAGAAGCAGAGAAAATGGTTAGCAC--CT-AAACAAAAACAGAAGAGAAAGAGGATGAA  
CACTTAAGCTTTACTTTCCCTTTTACCCTCCCATTCACAGTTAGGTT-CTACCTTGGACC  
C-----TGATTGTTCTTCAGGGAA---CGCTACCATAACCCT  
-CCTCTCCTTTGCTGTGCTCTACAAGAGTCTTGGGCTC-----TTGCACCCACCTT-----  
-----

---GTAGGTCCATAACCCTACAGGACTCTGGAGGAGAGAGTAAGGCTGA-----AGAC  
T-AGTGCAACTCTGCCTCACTTAAATCTAGTTACACCTAAGCCAAGAC-TCACCCTCAG  
GG---TGTCATCGTTCCTCTTC-----  
-----

---AAGAAGGAAGGATGAACAAT---AGCAAAGTACTTAC--CTTGCGATTGTGGCAG  
AACTCATAACCTTCTGCTTGCACCTCATK

>Tro

TTAGAAGCAGAGAAGATGGTTAGCAC--CT-AAACAGAAATAGGAGAGAAG--GGATGGG  
AGACATGACTTTACTTACCCTTTTCTCCCTCCCACTCACTGGTGGGTTCCACCTTGGACC  
C-----TGTTATTCTTGTTTGT-GTTGAGGGGA---AGCTTAA-----  
-----GCTC-----TTATCCCTACCTT---T  
TTTTCTTTTGTCTTTCTGGAGGGGGGAAGGTAGGGCAAGTAGGGTTAAGTGACTTGCCCAA  
GATCACACAGCTACTAAATGTTAGGTGTCTGAGGCTGGCTTTGAACTCAGGTCTCCTGA  
CTCCAGGGCTGGTGTGTATTCACTGTACCTCCTAGCCGCCCC--TTATCCTCACTTT  
---ATAGGTACGTG-CCTACAGGACTC--AAGAAGAGAGTGAGGCTGA-----  
-----GGTCTCACTTCAATCAAATGTCAGGCAAGTGAAGACCTCACTCTCAC  
GA---TGTCACTGTTCTCTTC-----  
-----

---CAGCACAAAGGATGAAC-----ACCAAGGGGACCTAC--CTTGCGATTGTGGCAG  
AACTCGTAACCTTCCGGCTTACACTCGTG

>Tvu

TTGGAAGCAGAGAAGATGGTTAGCAC--CT-AAACGAAAAT-GGAGAGAAA--GGCTGGACA--TTGGCTGAACTTTCCCATTCTCCTTCCCTCTCACTGTTGGGTTCCCACCTTGGACC  
C-----TGCTTGTTGTTGCTGTTTGC-GTTGAGGGGA---AGCTACCGTACTTT  
-CGG-CCCCTTTGCTTGCTCTAT--GAGTCTTGGGCTC-----CTATCCCTACCTC-----  
-----  
-----

---GTAGGTACGTT-CCTACAGGACCCTGGACGAGAGAGTGAGGCTGA-----CGACT--GCGCAAACCTCTCTCACTGCCATCCAGTTCATGCGCAAGTCAAGACCTCACCTCAT  
GA--TGTCATCGGTCCTCTTC-----  
-----  
-----

---CAGAACGAAAGGTGAACAAC---AGCAAGGGTACCTAC--CTTGCGATTGTGGCAG  
AACTCGTAACCTTCCGGCTTGCACTCATG

>Mr0

TTAGAAGCAGAGAAGATGGTTAGCAC--CT-AAAGAAAAACAG----GAAA--GGATGGACC-CTTAGCTTTACTTTCCCATTCACTCTCCCACTCTTCTGTTGGACTCCGGA-----  
-----TGC-TTTTCTTGTTGTTTGT-GCTGAGGGGA---AGCTACTGAACTCT  
-CCT-CCCATTGGCTTGCTCTACAA--GCTTGGGCTC-----TTATCCCTGCCTC-----  
-----  
-----

---GTAGGGACGTG-CCTACAGGACGCTGGAGGAGAGAATGAGGCTGAAGGAAGGACGACT--GCGCAACCCTGTCTCATTTCAATCCATTTCACTCAAGTCAAGACCTTACCCTCAT  
GA--TGACATCGGTCCTCCTC-----  
-----  
-----

---CAGAGCGAAGGAGAAGC-----AACAAAGACACCCAC--CTTGCGATTGTGGCAG  
AACTCATAACCTTCCGGCTTGCACTCATG

>Ptr

CTAGAAGCAGAAAAGATGGTTAGCAC--CT-AAAGAAAAACAGGAGAGAAA--GGATGGACC-CTTAGTTTTACTTTCCCATTCACTCTCCCACTC-TCTGTTGGGTTCCCACC-----  
-----TGC-TTTTCTTGTTGTTTGT-GCTGAGGGGA---AGCTACTGGACTCC  
-CCT-CCCATTGGCTTGCTCTACAA--GCTTGGGCTC-----TTACCCCTGCCTC-----  
-----  
-----

---GTAGGGACGTG-CCTACAGGACGCTGGAGGAGAGAATGAGGTTGAAGGAAGGACAAC  
T--GGGCAACCCTGTCTCACTTCAATCCAGTTCACACTCAACTCAAGACCTTACCCTCAT  
GAGGACATCATCGGTCCTCCTC-----  
-----  
-----

---C-GGAGGAAGGAGGAGC-----ATCAAAGGTACCCAC--CTTGCGATTGTGGCAG  
AACTCATAACCTTCCGGCTTGCACTCATG

>Vur

TTAGAAGCAGAGAAGATGGTTAGCAC--CT-AAAGAAAAACAGGAGAGAAA--GGATGGACAC-TTAGCTCAACTTTCCCATTCACTCTCCCACTTATTTGGG-----ACC  
C-----TGTTGCTC--TTTGTGTTGAGGGGA---AGCTACCGAACTCT  
-CCTCCCCCTTGCTTGCTCTACAAGAGTCTTGGGCTC-----TTGTACCTACCTC-----  
-----  
-----



---TTAGGTTTATG-CCTACAGGACCCTGGAGG--AGAGTCAGGCTGA-----GGAC  
T--GTGCAACCCTG-----CAATTCA-CCGCAAGTCAAGACCTCACCCTCAT  
GA---CATCATTTGGTCCTCTTC-----  
-----  
-----  
----CAGAACAAAGGACAAACAAC---ATCCAAGGTACCTAC--CTTGCGATTGTGGCAG  
AACTCGTAACCTTCTGGCTTGCACTCATG

MARKER 89

>RTESINE2

-----  
 -----  
 -----GATGCCAAGGTCATCC--ACTGCATCCC-----  
 -----GGCCATCACCAGTCATCCTGACTTTTGTCTTGCCA  
 CTGGACTTCGATGACTCTGGAAGAGAGAGTGAGGCTGATGACTTTGTGCAACTCTGCCTC  
 ACTTAAATCCAATTCATGCGCAAGTCAAGACATCACCCCATGATGTCATTGGTCCTCTTC  
 GAAAACGAAGG-----  
 -----  
 -----ACGAACAA  
 CAACAACAA-----  
 -----  
 -----

>WSINE1

-----  
 -----  
 -----  
 -----  
 -----  
 -----GAGGGGCAGCTAGGTGGTGCAGTGGATAGAGCACCAGCCCTGG  
 AGTCA-GGAGGACCTGAGTTCAAATCCAGCCTCAGACACTTACTA-----GCTGTGT  
 GACCCTGGGCAAGTCACTTAACCCCAATTGCCTCAAAAAAAAAAAAAA-----  
 -----  
 -----  
 -----

>Mdo

ATCCCCAGCAGAGTTCTACATATTGCTGC-CACTCTGTGATGGTACTTGAGGTTTCAGGGC  
 TAGGAGAGAATGGG--TA--GCAGGCTT-GGTGAGGGTGGT--GGCTGAGG-----  
 -----GGA-----  
 -----  
 -----  
 -----

-----CCCAGGACTCCTGCCTTTCTGGTAACC-AGGGGCTTCGCCC--A  
 CTTCTGCCTTGTAGTAGTAGCTTGTCTCAGATTCTGGGCC--TTAGTTTCCCCTTTGTCC  
 TCAGCTTCTCAACTAGGTTGGGAGAAGAAT-----AAAGGGAAGGGACCCTTCTTAGGCA  
 GTGTCTGGGAGAGGTAGATGCTGTCCAACCTTTCTTTTGTCCCAGATTGTGTACATGAAG  
 GCCAGACATATGGACCGGGGAGAGTTTCCAGCCAGGCAGC

>Dvi

-----ATTGCTGCCCACTCTGTGATGGTACCTGAGGTTTCAGGGC  
 TAGGAGAGAATGGG--TA--GCAGACTT-GGTGAGGGTAGT--GGCT-AGG-----

-----CCAGCAGGATGTCCTGAGA-----  
-----  
-----  
-----  
-----  
-----  
-----  
-----

-----CCCAGGACCTCTGCCTTTTTGGTAACC-AGGGGTTTCACCC--A  
TTTCTGCCTTGTAGTA--GCTTGTCTCTGATTCTGGGCC--TTAGTTTCCCCTTTGTCC  
CCAGC-TCTCTACTGAGTTGGGAGAAGAAC-----AAAGGGTAGAGGTCCTTCTCAGGCA  
GTGTCCTGGGAGAGGTAGATGCTGTGCGAACTTTCCTTCATCCCAGATTGTGTACATGAAG  
GTCAGACATATAGGCCGGGGGAGAGTTTCCAGCCAGGCA--

>Mnu

-----AATTCAGATTGCTGCCACTCTGTGATGGTACCTGAGGTTTCAGGGC  
TAGGAGAGAATGGG--TA--GCAGACTT-GGTGAGGGTGGT--GGCT-AGG-----  
-----CCAGCAGGATGTCCTGAGA-----  
-----  
-----  
-----  
-----  
-----  
-----

-----CCCAGGACCTCTGCCTTTTTGGTAACC-AGTGGTTTCACCC--A  
TTTCTGCCTTGTAGTA--GCTTGTCTCTGATTCTGGGCC--TTAGTTTCCCCTTTGTCC  
CCAGC-TCTCTACTGAGTTGGGAGAAGAAC-----AAAGGGTAGAAGTCCTTCTCAGGCA  
ATGTCCTGGGAGAGGTAGATGCTGTGCGAACTTTCCTTCATCCCAGATTGTGTACATGAAG  
GTCAGACATATAGGCCGGGGGAGAGTTTCCAGCCAGGC---

>Rra

-----CAGATTGCTGCCACTCTGTGATGGTACCTGAAGTTCAGAGC  
TAGGAGAGAATTGTA-TA--GCAGTGCTGGGTGAGGGTGGT--GGCC-AGGGAGGTTGGC  
TGGTCTGGGAGGACTTGCTGAGA-----  
-----  
-----  
-----  
-----  
-----  
-----

-----TCTAGGATTCCCTGCCTTTGTTGTAACC-AAGGATGTTACCCAAA  
TCTTATCTTGTGAGTA--GCTTGTCTCGGTTTCTGTGCC--TCAGTTTCCCCTTCATCC  
CCAATTTCTCAATAGGGTTGGGGGAAGAAT-----AAAGG-AAGGGGCCCTGCTCAGGCA  
GTGCCCTGGAAGAGGTAGATACTGTAGATCTTTCTTTTCATCCCAGATTGTGTTTCATGAAG  
GCCAGACGTATAGGCCGGGGGAGAGTTTCCAGCCAGGCA--

>Cfu

-----GTGATTGCTGCCACTCTGTGATGGTACCTGAAGTTCAGAGC  
TAGGAGAGAATTGTA-TA--GCAGTGCCGGGTGAGGGTGGT--GGCC-AGGGAGGTTGGC  
TGGTCTGGGAGGACTTGCTGAGA-----  
-----  
-----  
-----  
-----  
-----

-----  
-----  
-----

-----TCTAAGATTCCTGCCTTTGTTGTAACC-AAGGATGTTACCCAAT  
TCCTATCTTGTGAGTA--GTTTGTCTCAGTTTCGGTGCC--TCGGTTTCCCCTTCATCC  
CCAATTTCTCAATAGGGTTGGGTGAAGAAT-----AAAGG-AAGGG-CCCTGCTCAGGGA  
GTGCCCTGGAAGAGGTAGATACTGTAGATCTTTCTTTTCATCCCAGATTGTGTTTCATGAAG  
GCCAGACATATAGGCCTGGGGAGAGTTTCCAGCCAGGCA--

>Dg1

ATCCCCAGCAGGGGTCTACAGACTGCTGCCATTCTGTGACGGTACCTGAGGGTCAGGGC  
TAGGAGGGAACA-----GTTTGGCGAGGGTGGT--GGCTGGGGGGAG-----  
-----GC-TGGGC-TGGT--GA--T-----TCCT-----  
-----GGGGCCACCACCAGGTGTTTTGACTCTTGTCTTACCA  
CTGGACTCTGATGACTCTGGAGGAGAGAATGGGTTCATGACCTTGTGCAGCTCTGCCTC  
ACTTAAACCCAATTCCTCAAGTCAAGCCATCACCT-----CATGGTCC---TT  
GAGAATGAAG-----

-----ATGAACAA  
CAAACAATGATAG---TCCAGGACTCCTCCCTGTGCTGTAACC-AGGGACCTCACCCCAA  
TTTCTACCTTGCAGTA--GTTTGTCTCGGCTTTTGTGCC--TCAGTTTCCCCTTCACCC  
CCAATTTTCAAGTGGATTGGGAGAAGAAT-----AAAGG-AAGGAGTCCTTCTCAGGCA  
GTCCCCTGGG-----ATTCTGGTTGATCTTTCCTTCATCCCAGGTTGCATCCATGAAG  
GCCAGACATATAGGCCTGGGGAGAGTTTCCAGCCAGGCAGT

>Mfa

ATCC-----AGAATTCGTGATTGCTGCCACTCTGTGATGGTACCTG-----  
-AGGAGAAAATGGTG-TA--GCCAAGTTTGGTGAGGGTGGCAGGAGCAAGGAG-----  
-----GC-TGGAT-TGGCAAGA--CTGCTG-AGATCTGGG-----ACTCCCACCTTC  
AAGGGCTGAGATCCGGAAGTCTGGGACTGGCCCCAGTCCTCCTGCACCATGTCTTGCCA  
CTGGGCTCTGGTACCTCTAGAATAGTGATTAAGGCTGATGACTTTGTACAGTTCTGTCTC  
ACTTAAATCCAATTCCTCAAAAGTCAAGAGATCACCT-----CCTTGGTTCTCTTT  
GAGAATGAAG-----

-----ATGAACAG  
TAAACATCAACAA---TGCAGGACTCCTGCCTTGTT-TAACC-AGGGCCTTTATAG-AA  
TTTCTACT-GGTAGCA--GCTTGTCTCAGATTCTGTGCC--TCAGTTTCCCCTGCTTTT  
G-----GCTGGATTAGGGGAAGAAT-----AAAGG-AAGGGTCTTCTTGGGCA  
GTGCCCCGGGAAAGGTAGAACCCTGCTGATCCTTCTTCATCACAGATTGTATACATGAAG  
GCCAGAAGTATAAGCCGGGGAGAGTTTCCAGCCAGGCA--

>Bil

-----GTGATTGCTGCCACTCTGTGATGGTACCAGGGGGTCAGGGC  
CAGGAGGAAATGGTG-TA--GCCAGTTTGGCGAGGGTGGCAGCAGGGAAGAG-----  
-----GC-TGGGC-TGGCTAGA---CCCACTGAGGTCTAGG-----ACTCCT-----  
-----AAGGACAT-----TATTTTACTCTTGTCTGGCCA  
TTGGACCCCAATGACTATGGAGGAGAATGGGAGGCTGATGACTTTGCCAGGCTCTGTCTT  
ATTTAAACCCAGTTGTCTCAAATTCAGATATCAACCA-----CTTTGGTCTCTTT  
AGAATGGAGG--TCAAGGGG-CAGCTAGGTGG--ATGTAGATAGAACATCAGCCTTGG  
AGAAACGGAGGACATGAGTTCAAATTTGACCTCAGACACTTAATAATTCCCTAGCTATGT  
GATCTTGGGCAAGTCATTTAACTCTG-TTGCCTTGCAAAA-CCGAAAGAAAGAAAGAAA  
GAAAGAAAGAAAGAAAGAAAGAAAGAAAGAAAGAAA---GAATGGAAG--TCAAATGA  
ATAACAG-----TCTAGGATTCTTGCCTTTGTTGTAACCTCAGGGGCTTCAACC-AA  
TTTTTACCTTATAGTA--GCTTGCCTTAGATTCTGTGCCTCTCAG-----

---CTTCTCAGCTGCGTTGGGGGATGAATGGAGGAAGGGGAAGGGACCCTTCTCAGGCA  
GTGCTCTGGGA-----GAAGCTGTTGATCTTTCTTCATCCCAGATTGCACACATGAAG  
GCCAGACATATAAGCCCAGGGAGAGTTTCCAG-----

>Pgu

ATCCTCACCAGGGGTCTACAGATTGCTGCCCGCTCTGTGATGGTAACAGGGGGTTAGGGC  
CAGGAGAAAAT-GTG-TA--GCCGCATTTGGTGAGGGAAGCAGCAGGGAGGAG-----  
-----GC-TGGAC-TGTCTAGA---TTCACCAAGGTCTAGG-----ACTCCT-----  
-----GGGGACATCACCAGTCATCTTGACT-----GGCCG  
CTGGACCCCACTGACTCTGGAGGAGAGAGGGAGGCTGATGACTTTGCCCTGTTCTGCCTT  
ACTTAAACGCAATTGTCTCAAATTCAGATATCACCCA-----CCTTGGTCCCCTTT  
AAGAATGGAGG--CCAAGGGGGCAGCTAGGTGGCACAGTGAATAGAGCACCAGCCCTGG  
AGTCA-GGAGGTGCTGAATTCAAATCCAGACTCAGACACTTACTAATTACCTAGCTGTGT  
GACCTTGGGCAAATCCCTTAACTCCA-TTGCCTTGCAAAAAACAAAACAAAACAAA---  
ACAAAAA-----GAATGCAAG---TCAAACAA  
ATAATAG-----TCCAGGGTTCCTGCCTTTGTTGTAACGCAGGGGCTTCACCC-AG  
TTTTTATCTTGAGTA--GCTTGCCTCAGATTCTGTGCCCTCAG-----  
----CTTCTCAGCTGTGTTGGGGGATGAGTAGAGGATGGGGAAGGGGCCCTTCTCAGGCA  
ATGCCCTT-----CTTTCCTTCATCCCAGGTTGTATACATGAAG  
GCCAGATGTATAAGCCTGGGGAGAGTTTCCAGCCAGGCAGT

>Iso

ATCCTCACCAGGGGTCTACAGATTGCTGCCCGCTCTGTGATGGTAAC-GGGGGTTAGGGC  
CAGGATAAAATGGTG-TA--GCCGCATTTGGCGAGGGAAGCAGCAGGGAGGAG-----  
-----GC-CGGAC-TGGCTAGA---TTCACCAAGGTCTAGG-----ACTCCT-----  
-----GGGGACATCACCAGTCATCTTGACT-----GGCTG  
CTGGACCCCACTGACTCTGGAGGAGAGAGGGAGGCTGATGACTTTGCCCTGTTCTGCCTT  
ACTTAAACGCAATTGTCTCAAATTCAGATATCACCCA-----CCTGGGTCCCCTTT  
AAGAATGGAGG--CCAAGGGGGCAGCTAGGTGGCACGGTGAATAGAGCACCAGCCCTGG  
AGTCA-GGAGGTGCTGAATTCAATCCGGACTCAGACACTTAGTAATTACCTAGCTGTGT  
GACCTTGGGCAAATCCCTTAACTCCA-TTGCCTTGCAAAAA-CAAAACAAAACAACAAA  
ACAAAAA-----GAATGCAAG---TCAAACAA  
ATAATAG-----TCCAGGGTTCCTGCCTTTGTTGTAACGCAGGGGCTTCACCC-AG  
TTTTTATCTTG-----GATTCTGTGCCCTCAG-----  
----CTTCTCAGCTGTGTTGGGGGATGAATAGAGGATGGGGAAGGGGCCCTTCTCGGGCA  
ATGCCCTT-----CTTTCCTTCATCCCAGGTTGTATACATGAAG  
GCCAGACGTATAAGCCTGGGGAGAGTTTCCAGCCAGGCAGT

>Tro

-----ATTGCTGCCCACTCTGTGATGGTACCTGAGGGTCAAGGC  
CAGGAGAACATGGTG-TC--TCA-----GGGTGGCGAGG--TTGGCGAGGGG-----  
-----GG-GGAAG-CAGGGAGG--GGT-CTGAGGTCTAGG-----ACTCCT-----  
-----GGGGCCATGGCCAGTCCTCTCGACCCTTGTCTGCTGCCA  
CTGGACTCTGATGACTCTGGAGAAACAAGTGAGGCTGATGACTGTGCACAGTTCTGGGG-  
CAATAAACCCAATTCCTCCAAAGTC-----CTCTTC  
GAGAATGGAG-----

-----ATGAACAG  
ACAACAA-----GCCAGGACTCCTGCCTTTGTTGTAAC--TGGGGCGTCACCC-AA  
TTTCTCGCCTC-AGATT--CTGTGCCTCAG--TTTCCC--TCTGCCTCCC-----  
----CTTCTCAGCT-----GGGGGAAGGGGTCTTCTCAGGTA  
GTGCCCTGGGAG-AGTAGATGCTGTTGAACTTTCCGTCATTCCAGATTGTGTACATGAAG  
GCCAGACGTACGGGCCGGGAGAGAGTTTCCAGCCAGGC---

>Ppe

-----TCAGATGCTGCCCACTCTGTGATGGTACCTGAGGGTCGGGGC

CAGTAGAAAATGGTGGTATCGCAGGGTTT-GGTGGGGTGGCAGCGGGGAGGGG-----  
-----GG-----CTGGGGTCCAGG-----ACTCCT-----  
-----GGGGCCATTGCCAGTCTCTTGACTCTTGTGCATGCCA  
CTGGACTCCGATGACTCCGGAGAAGCAAGTGAAGCTGATGACTCTGCACAGCTCTGCCAC  
GCTTAAACCCAAGTCCCTCCAAAGTCCAGATATCACTCT-----CATTGGTGCTCTTT  
GAGAATGAAG-----

-----ACAAACAA  
CAAACAATAAGAA--ACCAGGACTCCTGCCTTGGTTGTAAC--AGGGGCTTCACCC-AA  
TTTCTACTTCATAGTA--GCTTGTCTCAGATTCTGTGCC--TCAGTTTCCCCTTTATCC  
CCAGCTTCTGAGCTGGGTTGGGGGAAGAAT-----AAGGGAAGGAATCCTTCTCAGGCA  
GTGCCCTGGGAGAGGTAGATGCTGTTGACCTTTCTTTCATCCCAGATTGTGTACATGAAG  
GCCAGACATATAGGCTGGGGAGAGTTTCCAGCCAGGC---

>Tvu

-----GATTGCTGCCACTCTGTGATGGTACTTGAGAGTCAGGGC  
TAGGAGAAAATGGTG-TA--GCAGGGTTTTGTGAGGGTAGTGGCAGGGACGGG-----  
-----GC-TAGGC-CGGCAAGA---TTT-CAAAGGCTGAGGTCCAGAACTCCT-----  
-----AGGGTCAGCGCTCGTCTCTTGACTCCTGTGCATGCCA  
CTGGACTCTGATGACTCTGGAGGAGTGAGTGAGGCTGATGACTTTGCACAGCTCTGCCTC  
ACTTAAACCCAATTCCTCAGAAGTCCAAATACCACCCT-----CATCGGTCCTCCTT  
GAGAATGAATG-----

-----ACAAACAA  
CAAACACCAATAA---TTCAGGACTCCTGCCTTTGTTGTAACC-AGGAGCTTCACCC-AA  
TTTCTACTCTGTAGTA--GCTTGTCTCAGATTCTGTGCC--TCAGTTTCCCCTTTGTCC  
CTGGCTTCTCAGCTGTGTTGGGAGAAGAAT-----AAAGAAGGGAGTCCTTCTCAGGCA  
GTGCCCTGGGAGAGGTAGATGCTGTTGACCTTTCTTCTATCCCAGATTGTGTACATGAAG  
GCCAGACACATAGACCCGGGGAGAGTTTCCAGC-----

>Mr0

ATCCCCAACAAGGGTCTACAGACTGCTGCCACTCTGTGATGGTACCTGAGGGTCAGGGC  
TAGGAGAAAATGGTG-TA--GCAGGGTTTT-GGGAGGGTAGCAGCAGGAAGGGG-----  
-----GC-TGGGC-TGGCAAGA---CTG-CTGGGGTCTAGG-----ACTCCT-----  
-----GGGGCCATCACCAGTCTCTTGACTCTTGTGCATGCC  
ATGGACTCCAAAGACCCTGGAGGACCATGTGAGGTTTCATGCCTTTGCACAGCTCTGCCTC  
ACTTGAACCCATTTCACTCCAAAGTC-----CT-----CACTGGACCTCTTT  
GAGAATGAAG-----

-----ATGAACA-  
CAAAAAC-AAGAA---TCCAGAACTCCTGCCTTTGTTGTAACC-ACGGGCTTTACCC-AA  
TTTCTACTTTGTAGTT--GCTCGTCCCAGATTCTGTGCT--TCTGTTTCCCCTTTGTCC  
CCAGCTTCTCAGCTGGGTCGGGTGAAGAAT-----AAAGGAAGGGTCCTTCTCAGGCA  
GTGCCCTAGGAGAGGAAGATGTTGTTGATCTTTCTTTCATCCCAGATTGTGTACATGAAG  
GCCAGACATATAAGCCTGGAGAGAGTTTCCAGCCAGGCAGT

>Ptr

-----ATTGCTGCCACTCTGTGATGGTACCTGAGGGTCAGGGT  
TAGGAGAAAATGGTG-TA--GTGGGATTTGGTGAGGGTAGCAGCAGGAAGGG-----  
-----GCTTGGAA-TGATAAGA---CTTGCTGGGGTCTAGG-----ACTTCT-----  
-----GGGGCCATCACCAGTCTCTTGACTCTTGTGCATGCC  
ATGGACTTCAATGACCCTGGAGGACCATGTGAGGCTCATGACTTTGCACAGCTCTGCCTC  
ACTTAAACCCATTTCACTTAAAAGTC-----CT-----CACTGGACCTCTTT

GAGAATGAAGG-----  
-----  
-----  
-----ATGAACA-  
CAAAAAC-AAGAA---TCCAGAACTCCTGCCTTTGTTGTAACC-TCGGGCTTCACCC-AA  
TTTCTACTTTGTAGTT--GCTCATCTCAGATTCTATGCC--TCGGTTTCCCCTTTGTCT  
CCAGCTTCTCAGCTGGACTGGGTGAAGAAT-----AAAGAAAGGGGTCTTCTCAGGCA  
GTGCCCTAGGAGAGGTAGATGTTGCTGATCTTTCCTTCATCACAGATTGTGTACATGAAG  
GCCAGACATACAGGCCTGGAGAGAGTTTCCAGCCAGGCA--  
>Vur  
-----GATTGCTGCCCACTCTGTGATGGTACCTGAGGGTCAGGGT  
TAGGAAAAAATGGAG-TA--GCAGGGCTCGGTGAGGGTGGCGGAAGGGAGGAG-----  
-----GC-TGGGC-TGGCAAGG---TTTACTGAGGTCTAGG-----ACTCCTGCCTTC  
AA-----AGGCTGAGATCCAGTTGTCTTGAC--TTGTCTTGCCA  
CTGGACTCTGATGACTCTGGAGGAGTGAGTGAGGCTGA--CTTTGCACAACCTCTGCCTC  
ACTTGAACCCAATTCACGTGAAAGTCAAGATATCACTCT-----CATTGGTCCTCTTT  
GAGAATGAAGG-----  
-----  
-----ACAATCC-  
-----GGGGGCTTCACCC-AA  
TTTCTACCTTGTAGTA--GCCTGTCTCAGATTCCGTGCT--TCACTCTCCCCTTTGTCC  
CCAGCTTCTCAGCTGGGTTGGGGGATGAAT-----AAAGGAAGGGGTGCTTCTCAGGCA  
GTGCCCTGAGAGAGGGAGACACTGTTGATCTTTCATTTCATCCCAGACTGTGTACATGAAG  
GCCAGACATATAGGCCTGGGGAGAGTTTCCAGCCAGGCA--





GCTCAGGTAAATCCC-CAAATATCCCTTTCCCTTCAGCAGATAAAA-----  
TGTCATCTGTGTGTACCCTTCAAGTATGGG-----TTCCCTGAAGGTTCTTC--  
-----TTGTCTCAGAAGCACACAGCTCTTTCC-TAGT-----

-----GATAGAGTATGGCTCTAAAATGAAAGTC  
ATTCATATAGAAGGAAACCTTTC-CTACTCAGATCCAGGTCCTATC--CTCTAGGAGTTT  
ACA-TCCAAGGCTATGCAG-----CAAAAGAGT-----

-----TAAGACCGCACTGGTGT-----AGCCATGGGAGAGG  
GGTC-TGAGCCCACCCAGGCTCCCTAC--CTTCTGTCCCTT

>Dg1

ATCACTATCATAACATCCCACGCTCCAGGACCGTCAGTTCCGTCAGGCACGGCTTGGCATT  
CTCACAGC--CTGGGGGGT-----GGCAATGGGAGAAGGGAAA--CTGTGGAA  
TGCCCATTAGTCAGCCCAGCTGCCCTCCCCCTTC-AACAAATCCTGGCTTGAAGAAA--T  
CCTCTAAAGGA-----TTTG-----CACCCATGTCCTTCTCTCCACTG  
GCCCAA-----GGGTTGTCCCTTTCCTTTCAGCAGCAACATTTCTTAGACAACA  
CCTCTATTTGTGTGTACCCTTAGACCTTGGG-----TTCCCTGAGGGTTTATTCTT  
GCCTCAGAAGCACAAAG-TTGTTGCACCTCA-TTCAATACT-GGCC-GAGT-----

-----GATAGAGTATGACCCTAAAATGAAATTC  
ACTCATATGGAATGAA-----TGCCA-GTCCTGCC--CTCTGTCTAGTTT  
ACATTCCAAGGCTATGTAACAAAAGAGCAGCCTGAGAGT-----

-----TAAGACCACACCCACTTGGGCAGTCCAGTACAATGAGAGG  
AGGC-TGAGCAGGCCAGACTCCCTAC--CTTCTGTCCCTT

>Nty

ATCACCATCATAAATCCACGCTCTAGGACCACCAGTTCTGTCTCAGGCACGGTTTAGCGTT  
CTCACAGC--CTGGGAGCAGAGGGAAGG--GGGAATAGGAGATGGAAGA--TTGTGGGA  
TAACCACAAGTCAGCCCAGCTGCCCTCCCCCTGC-AGCAAATCCTGGCTTGAAGAACTGC  
CATCTGCAGGAAACTTTCTGGATTTG-----CCCCCATGTTCTTCCCTCCACAG  
ACCCAGGTAAATCCCTGAGCTGTCTTT-CCTTTCAGCAGCAACATT-CCTTTGACCACA  
TGTCTATCTGTGTGTACCCTTAGGCCATGGG-----TTCCCTGAGAGTTTATTCTT  
GCCTCAGAAGCACAAAGC-TGCTCCTGGGCA-TTCAATAT-TGGCCAATGTT-----GG  
GGCAGCTAGGTGGTACAGTGGATAAAGCACCAGGCCTGGAGTCAGGAGAATCTGAGTTCA  
AATCTGGCCTCAGACACTTGACATTTAACTAGCTTGTGTGACCCTGGGCAANTNNNGAAN  
GCCCNGGNGCCGCNNNGNNGNNTNNGAGGNGGANNAAA--NNNNNNNN--CNNGNTCNC  
ACAGNTAGTACATATCAAGTGTNTGTNTGAGGNTGGATTGGAANTAGGTCCTCNTAAATC

CAAGGACTCTCTCCANTGTGCCA-----TNTAGC---TGCC--CCCAATGGAATCC  
ATTCATACAGAATGAAAGCCTGCCCTGCACAGAACCTGGTCCTACT--CTCTGGAAGTTT  
ATATTCCAAGGCTATGCAA-----CAA--AAAGCA---TTTTGT-CC---GCCCTT  
TGTTCCAGAAGAGGACCAGGGGCATCAAGGAGGTGATGTCTTCACTTACAAGTGAATTAG  
ATTTAAGT--GGCAGAGCTGTGC--AGTCATCAGCCTCAC-CCTCTCCTCCAGAGCCATT  
AGAATCTAGTGAC-AAGATATAGGGCAAGATAA-CTGGTGGATGGCCCCGATGCTGTGAA  
AGG-CAAAGCCTGTTTAAAGCCAAAGTCTTTTCTAAGTCTCAGTTTCTCTGAGGCAAAGC  
-----CATTCAATGATTCAAGGATAGGTGAGAAGTAAAGAAATGGCTTAG-TTTA  
CCTTCA-----TAAAAGACTTAATCAGGGAGGAAAAGA--CCCTCAAGGTTTCT--  
-C--TTAAGCTGAGAG---TAAGACCACACT-GGGG-----CTGTTT-----  
-----TGGGCTCCAGTAC--CTCCTGTCCC--

>Pta

ATCACCATCATAACCCACGCTCTAGGACTGTTAGTTCTGTTAGGCATGGTTTGGCATT  
CTCACAGC--CTGAGGAGT-----AAGAATAGGAAAAGAGAAA--TTGTGGGA  
T-----GCCAGCTG-----TAAATCCTGACTTAAACAAGT-G  
GACCTGCAGAAAGACGCTCCTGGATTTC-----CTCCCATGTTCTTCTCCACAG  
GCCACATAAAGTCTTGGACTGTCCCTTTTCTTTTCTCAGTAGGCACATTTCTTAGACAACA  
TGTCTATCTGTTGTGCCCTTAGAACATGGA-----TTTCTTGAGAGTGTATTCTT  
GCCTCAGAAGC-----TGTTCTGGTTG-TTCA-----TTGGCTTAAT-----  
-----  
-----  
-----  
-----

-----GATAAAGTATGGCCTCCAAATTAATTC  
ATTCATATAGAAT-AAAACCTGACCTACTCTACTAA---TCCTGCT--CTGTGGAAGTTT  
ACATTCCAAGGTTATACAA-----CA---AAAACAT--TGTTGC-TGTTTATCCTT  
TGATCTCAAAGGGACCAATGACCCAGGAAGGTGATATATTGACTTTC-----  
---AAATGAGGGAGGGCTGTGCAAGGTCATCTGCCTCAC-TTCCCCTCCAGAGTTATC  
TAGGTCCAGTAGC-AAGACACAGATCAGGACGACCTGGTGTGCTCTAGATGCAATGGG  
AGACCTTGCCATTTAAAGCGCAAGCCA-----AAGTCTGTCTGAGGTAACACC  
-----TATTC-CATTGTCAAGGCTAGGTGAGAAATGAGAT-AAAAGATGGCCTAGTTTTG  
CCTTCA-----AAGAAGAATCCATCAGGGAGGAAAAGA-----CT--  
-C--TTAGCCTGAGAGT---TAAGAGCACACTTAGGG-----CAGTTTGGTGAAAGG  
AGGC-TAAGAAGGTCCAGGCTCCCTAC--CTTCTGTCCCTT

>Dgo

ATCACCATCATAACCCACGCTCTAGGACTGTTAGTTCTGTGTCAGGCACGGTTTGGCATT  
CTCACAGC--CTGAGGAGT-----AAGAATAGGAAAAGAGAGA--TTGTAGGA  
T-----ACCTAGCTA-----TAAATCCTGGCTTAAACAAGT-G  
GATCTGCAGAAAGACCCGCTGGATTTC-----CCTCCATGTTCTTCTCCACAG  
GCCACATAAAACCTTGGACTGTCCCTTTTCTTTTCTCAGTAGGCACATTTCTTAGACAAGA  
TGTCTATCTGTTGTGCCCTTAGACCATGGA-----TTCCTTGAGAGTGTGTTCTT  
GCCTCA-----GAAGCTGGTTCTGGTTG-TTCAATAT-TGACT-TAAT-----  
-----  
-----  
-----

-----GATAAAGTATGGCCNTAAAATTAATTC  
ATTCATATAGCAT-AAAACCTGACCTACTCAGACCCTCGTCCTGCT--CTGTGGAAGTTT  
ACATTCCAAGGTTATGTAA-----CCA---AAAACAT--TGTTGT-TGTTACCCGT  
TGTTCTCAAAGGGGGCCAATGATCCAGGAAGGTGATATCTTACTTTC-----  
---AAGTGAGGGAGGTCTGTGCAAGGTCATCTGCCTCAC-TTCCCCTCCAGAGTTATC  
CAGGTCCAGTGGC-AAGAACCAGATCAAGACAA-CTGGTGTGCTCTGGATGCAATGAG  
AGACCTAGACCTTTTAAAGCCAAAGCCA-----AAGTTTGTCTGAGGCAACACT

-----CATTC-CGTTGTCAAGGT--GGTGAAAACCTGAGAT-AAAAGATGGCCTAGTTTTG  
CCTTCA-----CAGAAGAATCCATCAGGGAAGGAAAGA-----CT--  
-C--TTAGCCTGAGAGT---TAAGAGCACACTTAGGG-----CAGTTTGGTGACAGG  
AACC-TAAGAAAGTCCAAGCTCCCTAC--CTTCTGTTCCCT

>Scr

ATCACCATCATAACCCACGCTCTAGGACTGTTAGTTCTGTGTCAGGCAAGGTTTGGCATT  
CTCACAGC--CTGGGGAGT-----AAGAATAGGAAAAGAGAGA---TTATGGGA  
T-----GCCAGCTGC-----AAATCCTGGCTTAAACAAGA-G  
GATCTGCAGAAAGGCCCTCCTGGATTTT-----CCATGTTCTTCTCT-CACAG  
ACCCATATGAATCCTTGGACTGTCCCTTTTCTTTTCTTTCAGTAGGCACATTTCTTAGACAACA  
TGTCTATCTGTTGTGCCCTTAGACCATGGA-----TTCCCTTGAGAATGTATTATT  
GCCTCA-----GAAGC-TGTTCTGGTTG-TTCAATAT--TGGCTTAAT-----  
-----  
-----  
-----  
-----

-----GATAAAGTATGGCCCTAAAATGAAATTC  
ATCCATATAGAAT-AAAACATAACCTACTCAGACCCTGGTCCTGCT--CTGTGGAAGTTT  
ACATTTCAAGGTTATGCAA-----CAA--AAAAAT---TGTTGT-TGTTTATCCTT  
TGTTCTCAAAGGGACCAATGACTCCAGGAAGGTAGTATCTTGACTTTT-----  
----AAGTGAGGGAGGGGTATGCAAGATCACCTGCCTCAT-TTTCCCCTCCAGAACTATC  
TGAGTCCAGTGGC-AAGACACAGATCAAGACGA-CTGGTGATGGCTATGGATGCAATGGG  
AGACCTAGGCCTTTTAAAGCCAAAGCTAAAGCCA----AAGTTTGTCTGAGGCAACACC  
----CATTC-CATTGTCAAAGCTAGGTGAGAGTTGAGAT-AAAAGATGGCCTAG-TTTG  
CTTTCA-----CAGAAGAATCCATCAGGGAGGAAAGA-----CT--  
-CTTTTAGCCTGAGAGT---TAAGGGCACATTTCAGGG-----CAGTTCGGTGAAAGG  
AGGC-TAAGAAGGTCCAGGCTCCCTAC--CTTCTGTCCCT

>Bil

ATCACCATCATAACAACCCATGCTCTAGGACTGTCAGTTCTGTGTCAGACATGGTTTGGCATT  
TTCACAGC--CT-GGGGGT-----GAGAAAAGAGA---CTATGAGA  
TGCCCACAGGTCAGCCCAGCTG-CCTTCCC-AGCACCAAATCCTGGTTTGCAGAATTGT  
CAACCAAAGACAGCCCTCCTGAATCTGCCCTGCCCCCCCA---CCTCCTCTCCACAG  
GTCCAGGTAAATTCCTGGGATGTCTTTTCTTTTCTTTCAGCAACAACATTTCTTTGACAACA  
TATTTATCTGTTGGACCCTTAGTCTATGGA-----TTCCCTGAGAATTTATTCTT  
GTTTCAGAAGTAGAAAAC-TGTTTCTGGTTA-TTCAGTAC-TGGCC-----  
-----  
-----  
-----

-----TAGTGATAAACTGAAACTGAAATCC  
ATTCCTTCAGAATGAAAAGCTGCCCTATTCAGACCCTGGTCCTGAC--CTCTGGATGTGA  
ATAGTCCAAGGCTGTGCAA-----CC---AAAGCAT---TACTGT-TGTTTATCCTT  
CCTTCTAG---AGACCAATGACATCAGGA-GGTGATGTCTTGACTTGCAACTGAACTGG  
ATTTTCAGTGAGCCAGAGCTGTGCAAAGTCATCAGTCTCACTCCCT-CCTCCAGAGTGGTC  
AGAGTCCAGTGT--AAACATAGGT-AGGATGATC-AGAGATGGCCCAGGATGGAGTGGG  
AGACCTTGGTCTTTTAAAGCCAAGGTCTG--CCAGTTCTCAGTTTGTGTTGAGGCAAAAAC  
----CATTCAATGATTCAAGATTAGATAAGAAGTCTGAGGT-AAAAGATGGTCTCG-TTTG  
CCTTCA-----CAAAGAATCAAGCAGGGATGTGAAGA--CCCTCAAAGTTTCC--  
-T--TTAGGCTGAAAGT---TAAGACCACACT-GGGG-----CAACTGAGGGAGAAA  
AGGCTTGGAGCAGGTCTGAAATCCCTAC--CTTCTGTCCCT

>Tro

-----CACGTTTGGCATT  
CTCACAGC--CT-GAGGGT-----GGG-AACAGGAAAAGAGAGA---TTTGTGGGA

T-----GCTGCCC-TCCCCCTGAAGTAAATCCTGGCTTAAAGAGCTGC  
CATCTGCA-GAAAACCTTCTGGATTTG-----CTCCCATGTCTTCTCTCACAG  
GCACAGGTAAATCCCTGGGATGTCCCTTTCTTTTCAGCAGCAACATTTCTTAGACAACA  
CATCTATCTGTTGTACCCTTAGATCATGAG--ATTTTATTAAACCTGAGAGTTTATTCTT  
GCCTAAGAAGCAAGAAGC-TATTCTGGTTG-TTCAATAC-TGGCCTTGTG-----  
-----  
-----  
-----  
-----

-----ATAAAGTATAAC-CCTAAAGAGAAATTC  
ATTTATACAGAATGAAAACCTGCCTTA-TCAGACCCTGGTCCTGCC--CTCTGGAAGTTT  
ACCTTCCAAGGCTATGCAA-----CA--AAAGAAA--CATTGC-TGTTCAATCTT  
AATTCTAGAAGAACGCCAATGACATC-----GTCTGGACTTGCAAAGAAGTGG  
ATTTAAGTGAGGCAGGGCTGTGCAAAATCATCAGCCTCACTCTCT-CCTTCACAGTCATC  
AGAGTCCAGTGGC-AAAACACAGATCAGGACTA-CT-----GCATGCAGTGGG  
AAACCTCGACCTTTATAAGCCAAGGTCTTTCCCAGGTCTCAGTTTGTCTGTGACAACACC  
CATGACATTC-AGTAACCAAGGCTAGGTAAGGAATGAGGT-AAAAG-TGACCCAG-TTCG  
CCTTTA-----CAAAGAATCCATAGGGAAGGGGAAGACTTTCTCAGAGCTTCC--  
-C--TTAACCAGAGTGT-----GG-----CAGCTGGGTGAAAGG  
AGGC-TGAAAAGGTCAGGGCTCCCTAC--CTTCTGTCCC--

>Ppe

ATCACCATCATAACAACCCACGCTGCAGGACTGTCAGTTCTGTGAGGCACGGTTTGGCATT  
CTCACAGC--CT-GGGGGT-----GTG-AAAAGGAGAAAAGGAA--TTGCGGAA  
T-----GCTGCCC-TCCCCCTGAAGTAAATCCTGGCTGTAAGAAGTGC  
CATCTGCAGGAAAATCTTCTGGATGTG-----GCCCCACGTCTTCTCTCCACAG  
GCCCAGGTAAATCCCTGGGATGTCCCTTTCTTTTCAGCAGCAACATTTCTTAAACAACA  
TGTCTGTCTGTTGTATCCTTAGACCATGGG-----CTCCCTGAGAGTTTATTCTT  
GCCCAAGAAGGATAAAGC-TGTTCTGGTTA-TTCAATAT-TGGCCTTGTG-----  
-----  
-----  
-----

-----ACAAAGTACAAC-CCTGAAGTGAAATTC  
ATTCATACAGAATGAAAACCTGTCC-AATCAGACCCTGGTCCTGCC--CTCTGGAAGGTT  
GCCTTCCAAGGCTATGCAA-----CA--AAAGCAA--TGTTGC-TGTTCACTCTT  
TGTTCTAGAAGAAGACCAATGGCATCAGGAGGGTGATGGCTTGACTTGCAAGTGAGCTGG  
ATTTAAGTGAGATAAGGCTGTGCAAAGTTACCAGCCTCACTCTCT-CCTCCACAGTAGTC  
AGAGTTCAGTGGC-AAAACACAGGTCAGGGCTA-CTGGTGAGGGCCAACGGTGCAGTGGG  
AGACCTTGACCTTTCTAAGCCAAGGACTTTCCCAGGTCTCATTTTGTCTGTGGAAACACC  
-----CATTTC-AGTAGTCAACGCTAGGTAAGAAGTGAAGT-AAAAGATGACCTAG-TTCA  
CCTTCA-----CAAAGCATCAATCAGGAAGGGGAAGACTTTCTCGGAGGTTCT--  
-C--TCAACCAGAGAGT--TAAGACTGCACT-GGGG-----CAGCTGGGTGAAAGG  
AGGC-TGAGCAGGTCCAAGCTCCCTAC--CTTCTGTCCCCT

>Tvu

-----CACGGTTTGGCATT  
CTCACAGC--CTAGGGGGT-----AGG-AATAGGAGAAGAGAGA--TTATGAGA  
T-----GCTCCCC-TCCCCCTGCAGTAAATCCTGGCTTGAAGAAGTGC  
CATCTGTAGGAAAACCTTCTGGATTTGG-----CCCCTGTGTCTTCTCTCCACAG  
GCCCAGGTAAATCCCTGGGCTGTCTCTTTCTTTCCGCAGCCACATTTCTCAGACAAGA  
TGTCTATCTGTTGTACCCTTAGACCATGGG-----TTCCCTGAGAGTTTATTCTT  
GCCTCGGAAGCACAAGC-TGTTCTGGTGG-TTCAATAT-TGGCCTTGTG-----  
-----  
-----

-----  
-----  
-----ATAAAGTACGACTCCTAAAATGAAATTC  
ATTCATATAGAACAAAAGCTTGCCCTACTCAGACCCTGGTCCCGCC--CCCTGGAAATTT  
ACATGCCAAGGCTATGCAA-----CA--AAAGCAT--TGTTGT-TGTTTCATCCTT  
CGTTCT--AGAAGACCAATGACATCAGGAGGGTAATGTCTTGACTTGCAAGTGAACCTGG  
ATTTAAATGAGGCAGGGATGTGCAAAGTCATCAGCCTCCTTCTCT-GCTCCAGAGTCACT  
GGAGTCCAGTGGCAAAAACACAGGTCAGGACTA-TTGGTGATAGCCATGGACGCAGTGGG  
AGACCTTGGCCTTTTTTGAGTCAAGGTCTTTCCCAGATT-CAGTTTGTCCGAGGCAACACC  
-----CATTTC-AGTAGTCAAGGCTAGGTAAAACTGAGGTTAAAAGATGGCCTAG-TTTG  
CCTTCA-----CAAAGAATCAGTCCAGGAGGGGAAGACATTT--AGAGTTTCT--  
-C--TTAACCAGAGAGT--TAAGACCACAC--CGGG-----CAGTTGGATGAGAGG  
AAGG-TGAGCAGGTCCGGGCTCCCTAC--CTTCTGTCCC--

>Mr o

ATCACCTCATACAACCCACGCTCCAGGACTGTCAGCTCTGTTCAGGCACGGTTTGGCGTT  
CTCACAGC--CTGGGAGGT-----GGACAGAAGACAGA--CTGTGGGA  
T-----GCTGCCCTTCCCCTTGCAGTAAATCCTGGCTTGAAGAGCTCC  
CAACTGCAGGAAAACCTTCTAGATTTG-----CCCCATGTCTTTTCTCCATAG  
GCCAGGTAAATCCCTGGGCTGTGCCTTTCCTTTCAGCAGCAACATTTCTTAGTCAACA  
CATCTGTCTGTTGTACTCATAGACCATGAG-----TTCCCTGAGAGTTTTTTTTT  
TN-TAAGAAGCACAAAGC-TGTCCCTGGATG-TTCAATAC-TGGCCTTTTT-----

-----  
-----  
-----GATACAGCATGACCCTAAAATGAAATTC  
ATTCATATGGAATGAAAGCCTGCCCTCCTCAGACCCTGGTCCCTGCC--CTCTGGAAGTTT  
ATATTCCAAGGCTATGCAG-----CA--AAAGCAT--TTGTGGTTGTTTCG-----  
-----TGACATCAGGAGGGTGATGCCCTGACTTGCGAGTGAACCTGG  
ATTTAAGTGAGGCAGGGGTGGACAACATTATCAGTCTCACTCTCTCCCTCCAGAGTCATC  
GGAGTCCAGTGGC--AAAACATGGTCTGGACGA-CTCATAATGGCAAAGGATGCAGTGGG  
AGACCTTGACTTTTTTAAACCAAAGTCTTTCCCAGGTCTCAGTTTGTCTGAGGCAACACC  
-----CATCC-AATAGTCAAGGCCAGGTAAGAACAGAGGT-AAAAGACAGCCTAG-TTTA  
CCTCCA-----CAA-----TCAATCCA-----AGTTTCT--  
-C--TTAACC--AGAGT--TAAAACCAC-----  
-----CCAGACTCCCTAC--CTTCTGTCCCTT









>Rra

GATTGCCTCCAAATG--GTAATCCTTGATTGTTTCC-TTCCATTAGAAGTAGCATGATGG  
TAACACTGCCCA-----CAGAAGACCTGGGTT---CCAGTCCTGGCTCC-ATA--  
-ACTGCCTACCCTA----GCTATCCACTGAGGGGTGAGGACTTGATGACAA--AAGG-TC  
CCC-CCACCCCTACACCTCTCTATGCAGGCTGGGATCCTGTAA---TTCC-----TCT  
TTTACCTCATTTCCATCACTGTTTT-CTCACTCAGGCCCATG---TTAAGTCTTCCTA  
GGTTAGAGCCGACTTTT-GGACTACTTTGAAGAGC--TTTGGCTCAGGAA--TAGAGAGT  
TAACATTTCAGGTCACTTAGCAGGATGTAACAGGTTGAAACTCTAATTCATTGCCTCTTT  
TCCCTGATT-----GTATCATAAAGAT-----GAGAGCACCTAAGTA  
-GGGG-AAAGGAGGAGAGTCAGTTCTAAAGACTGGATAGACAAGTTCAGAAGTACTTTTG  
TGATCGGTGTCACTGCTTCAGCCTAAGGAAGCAGTGGGAATCAAA--TGCAAAACAAC  
CATTACCCCTTCTG-AGGGGCTGAGGGTT-----

-----CCTTCCGGG  
GCATTG--CTTAGGCTCA-GTGATGCACAAG-TACCTTCCAGCTATTT---GG---GT--  
-----AGCAAAAGCAGAATAGG  
AGTCGATCCAGGCACTCATACTTTGAACTCCACATTAAGA-----CTGC-----  
-----AGAAACATGGGAGAAATCTCTTT-AGAGGAGT  
AGTTAGTGATCTGAAATATTTGCAGGGG-TCATT--GGC-ACTGANAAGGTGCCA-ACC  
AC-----TGACCTAGCCCTCCTGGAACGGTT-----  
-----TGA  
ACCACTTTACTAGGG--TCACAGGTTTTCTANATCCTTTCTGAATAAACTCNCC--AGT  
GTCCTCTGATGCCATTTCAA--ATTGGAAGTATAGCAATCT-----

>Cfu

NAAGGCCTCCAAATG--GTAATCCTTGATTGTTTCC-TTCCATTAGAAGTAGCATGATGG  
TAACACTGCCCG-----AAGAAAACCTGGGTT---TCAGTCCTGGCTCC-ATA--  
-ACTGCCTACCCCA----GCTATCCACTGAGGGGTGGGACTTGATGAC-----CC  
CCCTGCA-----CCTCTCTTTGCAGGCTGGGATCCTGTAA---TTTC-----TCT  
TTCTGCTCATTTT-ATCACTGTTTT-CTCACTCAAGCCCCATG---TTAAGTCTTCCTA  
GGTTATAGACGACTTTT-GGCATACTTTGAAGAGC--TTTGGCTCAGGAA--TAGAGAGT  
TAACATTTCAGGTCACTTAGCAGGATGTAACAGGTCGAGACTCTAATTCATTGCCTCTTT  
TCCCTGATT-----GTATCATAAAGAT-----GAGAGCACATAAGTA  
-GGGG-AAAGGAGGAGAGTCTATTCTAAAGACTGGATAGACAAGTTCAGAAGTACTTTTG  
TGATTGGTGTCAATCTGCTGCAGCCTAAGAAAACAGTGGGAACCAAA--TGCAAAACAAC  
CATTACCCCTTCTTAAATGGCCGAAGGTT-----

-----CCTTCCTGG  
GCATTG--CTTAGGCTCA-CTGAAGCACAAGACACCTTCCAGCTATTT---GG---GT--  
-----AGCAAAAGCAGAATAGG  
AGTCGATCCAGGCACTCATACTTTGAGCTCCACATTAAGA-----CTGC-----  
-----AGAAACAT-GGAGAAATCTCTTT-AGAGGAGT  
AGTTAGTGATCTGCAATATTTGCAGGGG-TCATT--GGC-ACTGAGAAGGTGCCA-ACC  
AC-----TGACCTAGCCCTCCCGGAACGGTT-----  
-----TGA  
ACCACTTTAGTAGGG--TCCACAGGTTTTCTAGATCCTTTCTGATTAAACTCACT--AGT  
GTCCTCTGATGCCATTTTCA--ATTGGAAGTATAGCACTGGATTTCGTTAATGCA

>Dg1

GATTGCCTCCAAATG--GTAATCCCTGTTTGCTTCC-CTCAGCTAGAAATAGCAATAGTG  
GCACCACTCCAGATGTTGAGACAGAGGACCTGGGTT---CCAGTCCTGGCTCTGATA--  
--CTACTATTCATA----TCTATAAAAGGA-----GAGG----TGTGATTACTAGGG-TC  
CCTACCA-----CCTCTAAATA----CCATGATCCTTTGA---CTTC----CGTCT  
CTCTTCTCACCAAAGTCACTGTTTTTACTCTTTTCAGGCCTCATGGGTTTAAGTCTTCCCA  
GATCAGAACTGGCTTTTTGACCTACTTTAAAGAGCTTTTTGGCTCAGTATCAGAGAATGT  
-AACACTTCAGGCCATTTAGCAGGATGTAACAGGTTTCAGTCCTTAATCCATTGCCTCCTC  
T----CTGTGTCTAGT--ATAAAGATACCTTGGCAGGGTGAAATGGGAGTACTTC-ATA  
-GGGG-AAGATAGGAAAAGCAATTCAAAGACTGGAAAGGCTAGTTACCAACACTTTTG  
TGATCAGTGCCAATCTGCTGCAGCTCAAGGCAGGAACGTGATCCAAA-TGCAA-CAAC  
CCTTACT-----GGCCTAAGGTT-----CTTTTTTTTTTTTTGTGGGGCAA  
TGGGGATTAAGTGACTTGCCCAGGGT-CACACAGCTAGTAAGTGTCAAGTGTCTGAGGCC  
GGATTTGAACTCAGGTCCTCCTGAATCCAGGGCTGGTGCCTTCTCCACTGCACCACCTAG  
CTGCCCCCT-GGCCTAAGGTTT----TAACTG-----GCCTAAC-----TGCTGCTGG  
GCATTTTCCCA-GGCTTA-CTGATGGACA-GATGCCTTCCAGCCATTTT--GG----T--  
-----  
-----AGC-AAAGCAGTGTCAA  
-CTAGGTCCAG-----  
-----  
-----ATGCTCACCTATAAAGAA-GTATCAA  
GTTGGCCAGATGATGACTTCCCTCTCTGATCCAGTCCTCCAGGAAGGGTT-----  
-----TGA  
AGGATTACTTTGATAGAACCTCAGGTTTTTAAGATACTTTCGAGTTAAACTTACCACTGT  
TTCCTCTGATGCCATTTTCAG--ACTGGAAGTATAGC-----

>Pta

ACAGGCCTCCGAATG--GTAATCCTTGTTTGCTTCC-CTCAGCTAGACCAGGGATCA-TG  
GCACTCTTCCAGATGGTAGAGCTGAGGGCTTGGGTT-----TCTCGAGGCTTTGATA--  
--CCACTTTCCTTA---TCTGTAAAATGAAGGTTGTGGATTTCAGTGATTACTGAAG-TC  
CTTCTCA-----CCTCTAAATG----CCATGATCCTTTAA---CTTCTCTCTGTCT  
CTCTTCTCACCATAGTCACTGTTTGTACTTTCCAGGGCCC-----A  
GGTCAAAACTGGCTTTT-GACCTATATTGTAGAGC--TTTGGCTCAGTGTGAGAGAGAAT  
-AATACTTCAGGTCATTTAGCAGGATATAACAGGTTTCAGTCTTTAATCCATTGCTTCTTC  
T----CTATGTCTGGTGTCAAA---ACCTTGGCAGGGTGAAATGGGAGTACTTC-ATA  
-GGGG-AAGGTAGGAAAAGTAGTTCAA-GACTGGAAAGGCTAGTTTCATCAACACTTTTA  
TGATCAGTATCATTCTGCTGTAGCTCAAGGC-----TGATCCAAA-TGCAA-CTGC  
CTTTACT-----GGCCTAAGGTT-----  
-----  
-----CTTAACTG--CTTGGTCCAAGGTT---ACTTCCTGA  
GTATTTTTCCA-AGCCTA-CTGATGGACA-AATGTCTTCCATCTATTT--GGATGGT--  
-----  
-----AGT-----AATGTAGG  
-CTCAATCTAAGCTCTTGCCAATTA--GCTCCACATTAAGATAGGTTTGGC-----  
-----  
-----AAAAGCTTTAGTGAAATCTCCTTTAGAAGAAT  
AGTCAGTGATGTGCATTATTGGCAAGCAGTTATTAGTAGC-ACCAAG---GTCTCAAATT  
ATTGGCTGGAGGGATACTTCTCTCTGATCCAACCCTCCAGAAAGGATT-----  
-----TGA  
GCCCC---TTTGATAG--CTTCAGGTTTTTAAGATAATTTCTAGTTAAACTCACCCTGT  
TTTCTCTAATGCCATTTTCAG--ATTGGAAGTATAGCTCTGGATTTATTAATGCA

>Dgo

ACAGGCCTCCTAATG--GTAATCCTTGTTTGATTCC-CTCAGCTAGACTAGGGATCA-TG  
GCACTCTTCCAGATGGCAGATCTGAAGGCTTGGGTT-----TCTCGAGGCTCTGATA--  
--TAATTTTCCTTA----TCTGTAAAATGAAGGTTGTGGATTGATTACTGAAG-TC  
TCTCTCA-----CCTCTAAATG----CCATGATCCTTTAA--CTTTTCTCTGTCT  
CTCTTCTCACTTCAGTCACTGTTTGTACTTTCCAGGGCC-----AAATCTT-----  
-----ACTGGCTTTT-GACCTACATTGTAGAGC--TTTGGCTCAGTGTGAGAGAGAAT  
-AATATTTGAGGTCATTTAGCAGGATATAACAGGTTGAGTCTTTAATCCATTGCCTCTTC  
T----CTATGTCTGGTGTGATAA----ACCTTGGCAGGGTGAAATGGGAGTACTTC-ATA  
-GGGG-AAGGTAGGAAAAGTAGTTCAA-GACTGGAAAGGCTAGTTTATCAACACTTTTG  
TGATCAGTGCCATTCTGCTGTAGCTCAAGGC-----TGATCCAAAATGCAAA-CAGC  
CCTTACT-----GGCCTAAGATT-----  
-----  
-----

-----CTTAACTG--CTTGGTCCAAGGTT---ACTTCCTTA  
GTATTTTCCA-AGCCTA-CTGATGGACA-GATGTCTTCCAGCTATTT---GGATAGT--  
-----

-----ATT-----AATGTAGG  
-CTCAATCTAAGCTCTTGCCAATTA--GCTCCACATTAAGATAGATTTAGC-----  
-----

-----AACAGCTTTAGTGAAATCTCCTTTAGAAGAAT  
AGTCAGTGATGTGCATTGTTAGCAAGCAGTTATTAGTAGC-AC---CAAGGTCTCAAATT  
ATTGGCTGGAGGGATACTTCTCTGATCCAACCCTCCAGAAAGGAGT-----  
-----TGA  
GCCTC---TTTGATAG--CTTCAGATTTTAAAGATAATTTCTAGTTAAACTCACCCTGT  
TTCTCTAATGCCATTTTCAG--ATTGGAAGTATAGCTCTGGATTTATTAATGCA

>Tro

ACAGACCTCCCASTG--GTRATTCTKATGTGCTACC-CTCCATTAGAAGTAGAGAG--TG  
GCACTGCTWCTAGGTGTTGGATCGGAGGGCCTGGATT---CCAGTCCTGGCTCTGATC--  
--TTACCTCACCTG---TCTAGAAAATGAGGGCTATGGATCCAGTGATTCCTAAGGTTT  
CCTTCTA-----CCTCTAAATG----CCCTGATCCTTTCA--CTTCC-----  
---MTCTCAT---AGAC-----GGCCCAGTAGGTTAAGTCTTCTCA  
GGTCARAACCTGGCCTTT-GACCCACTTTAAAGAGC--TTTGGCTCAGCATTACAGGGAGT  
T-----AACACTTAGCAGGATGTAACAGGT--AGTCTTTAATCCATTGCCTCCTA  
T---CTGTGTCTG---CATAAAGTTACCCTGGCAGGGTGAAATGGAAGTACTCC-ATA  
TGGGGTAAAGTAGGAGAAGCAATTCAA-GACTGGAAAGGCTAGTTACCAACACCTTTG  
TGATCAGTGCCAACTGCTGCAGCTCAGGGCAGGAACGTGATCCAAA-CGCAGA-CAAC  
CCTCACT-----GGCCTGAAGTT-----  
-----  
-----

-----CCTTCCC-----GGGCCC-----  
-----TTTCCCAGGCTTA-CTCACGGACA-CGGGCC-----  
-----

-----AAAGAGGACCATGACACCAGGGAGGT  
GATGCCATGACATGCAAGTGAATTGGATTTAA--CGAGGG---AGCAAA-GCAGTACAGG  
-CTCAGTCCAAGCAGTCACTAATTA--GCTTCACAGTAAAGATAGATCTGACTTC-----  
-----

-----AGAAGCTTTA-GGAAGGCTCCAT-AGAGGGAT  
AGTTAATAG--TGTGGTATTGGCAGGGGGTCACTGGTGGC-ACTGAGAA-GTCTCAAGCT  
ATTGGCTGGA-----TGATACTTCCCCCAGGAAGGGTT-----  
-----

-----TGA  
ACCAC---TTTGATAGAACCCAGGTTTTTAAAGAGAATTTCTAATTAACCTACCACTGT  
TTCTCTGATGCCATTTTCAG--ATTGGAAGTACAGCTCTGGATTCATTAATGCA

>Mro

ACAGGCCTCCCAATG--GTAATCCTCATGTGCTTCCCGTGTGCTACAAGTAGAGAGAGTA  
GCACTGGTCCAGATGTT-----GGGTT---CCAGTTCTG-CTCTGAYC--  
--CTACCTTCGCTG---TCAAGAAAATAAGGGGTGTGGATTCAGTACTACTAAGG-TC  
CCTCCCA-----CCTCTAAATG-----ATCCTTTCA---CTTCC--CTCTGT  
CTCTTCYCACCATAGTTACTGTTTTTCTCTCTCAGGCCCTATAGGTTTAAGTTTTCCCA  
GGTCAGAACYGGCTTTT-GACCTACTTTACAGAAC--TTTGGCTCAGTATCAT-----  
-----CACTTAGCAGGATGTAACAGGTTTAGTCTTTAATCCATTGCCTCCTG  
T----CTGTCTCTGATATTCTAAAGTTACCTTGGCAAGGTGAAATGGGAGTATTTT- TTA  
TAGGGTAAAGTAGGAAAAGCACTTCAA- GACTGGACAGGCTGGTTACCGACACTTCTG  
TGATCAGTGCCAGTCTGCTCCCAGTGGGGCAGGAATGTGATCCAAA- TGCAA- CAAC  
ACTTACT-----GGCTTAACGTT-----  
-----

-----GCTTCCT-----GGGCAT-----  
-----TTTCCCAGGCTTA-CTGATGGACT-GAATGG--CCATGT-----GG--GGT--  
-----G---GTGTTTGTCTTTTGTCTCAAAGAGGACCATGATGTCAGGGAAGT  
GATGCCATGACACACAAGGGAATCAGATTTAA-GTGAGAG--AGCAA-GCAGTATAGG  
-CTCAGTCCATAGTCTCAACAATTA--GCTTCACATTAAGACAGATCTGGCTTC-----  
-----  
-----AGAAGCTTTAAGGAAATCTTCT---GAGGAAT  
AGTCATTAA--TGCGTTATTGGCAGGGGGTTATTGGTGGC- ACTAAGAA-GTCCCAGACT  
GTTGGCTGGG-----TGATACTT-CCTCCAGGAAGGGTT-----  
-----TGA  
ATCAC--TTTGATAGAACCCTAGGTTTTTAACATAATGTCTAATTAACTTACCACTGT  
TTCTTCTGATGCCATTTTCAAG--ATTGGAAGTATAGCTCGGGATTCATTAATGCA

>Ptr

ACAGGCCTCCCAATG--GTAATCCTCATGTGCTTCCCTGTGTGCTACAAGTAGAGAGAGTA  
GCACTGGCCCCAGATGTT-----GAGTT---CCAGTTCTG-CTCTGATCCT  
TCCTACCTTCCCTG---TTGAGAAAATAAGGGGTGTGGATTCAGTACTACTAAGG-TC  
CCTCCCA-----CCTCTAAATG-----ATCCTTTCA---CTTCTTCTGT--  
CTCTTCTCACCGTAGTTACTGTTTTT-CTCTCTCAGGCCCTATAGGTTTAAGTTTTCCCA  
GGTCAGAACTGGCTTTT-GATCTACTTTATAGAGC--TTTGGCTCAGTATCGT-----  
-----CACTTAGCAGGATGTAACAGGTTTAGTCTTTAATCCATTGCCTCCTA  
T----CTGTGTCTGATATTCTAAAGTTACCTTGGCAGGGTGAATGGGAGTATTTT- TTA  
TAGGGTAAAGTAGGAAAAGCACTTCAA- GACTGGGCAGGCTGGTTACCAACACTTCTG  
TGATCAGTGCCAGACTGCTGCCACTGAGGGCAGGAATGTGATCCAGAA- TGCAA- CAAC  
ACTTACT-----GGCCTAATGTT-----  
-----

-----GCTTCCT-----GGGCAT-----  
-----TTTCCCAGGC-TTCTGATGGACT-GAATGG--CCTTGT-----GG--GGT--  
-----G---TTGTTTTTCTTCTCTCAAAGGACGATGATATCAGGGAAGT  
GATGCCATGATACGCAAGGGAATCAGATTTA--GTGAGAG--AGCAA-GCAGTATCAG  
-----TCCACACTCTCAACAATTA--GCTTCACATTAAGATAGATCTGGCTTC-----  
-----  
-----AGAAGCTTTAAGGAAATCTCCC---GAGGAAT  
AGTCAATAA--TCCATTATTGGCAGAGGGTTATTAGTGGC- ACTAAGAA-GTCTTAACT  
GTTGGCTGGG-----TGATACTT-CCTCCAGGAAGGGTT-----  
-----TGA  
ACCAC--TTTGATAGAACCCTTAGGTGTTTTAAGATAATGTCTAATTAACTTACCACTGT  
TTCTTCTGATGCCATTTTCAAG--ATTGGAAGTATAGCTCTGGATTCATTAATGCA

>Vur

ACAGGCCCCCTAATG--GTAATCCTTGTGTGCTTCC-CTCAACTAGAAGTGAC-----  
CGAGTGCTCCCAAATGTTGAGTCAAAGGATCTGGGTT---CCA-TCTTGGCTCTGCTC--  
--CTACCTTCCCTA----TCTAGAAAGTGAAGGGTGTGGATTTAGTGATTACTA-AGTTC  
CCTTCCA-----CCTCTAAATG----CTGTGATCCTTTCA---TTTCTCT--CAGT  
CTCTTCTCACCATAGTCCCCATCTTTACTCTCTTAGGCCCCATCCATTTAAGTTTTCCA  
GGTCAGAATTGGCTTTT-GACCTACTTTAACGAGC--TTTGGCTCAGTATCAGAGAGAA-  
---CACTTCAGGTCGCCTAGCAGGATGTAACAGGTTTCAGTC---AACCATTGCCTCCTT  
CCTCTCTGTGCCTAGTATCATAAAGATGCCTTGGCAGGGTAAAATGGGAGTACTTC---A  
TAGGGTAAAGTAGGGAAAGCAATTCAAA-GACTGGCAAGGCAAGTTACCAGCACTTCTG  
TGATCAGTGCCAGTCTGCTGCAGCTCAGGGCAGGAAAGTGATCCAAA-TGCAGA-CAAC  
TCTTACT-----GGCCTAAGATT-----  
-----  
-----CCTTCCT-----GGGCAC-----  
-----TTTCCCAGACTTTGCTGATGGACT-GATGCCCTCTAGACATTTGGGGGGGGGT--  
-----GTTGTTGTTTGTCTTTGTTCTTAAAGAGGACCATGACATCAAGGAGGT  
GATGCCATGACATGCAAGTGAATTGGATTTAA-GTGAGGG--AGCAAA-GCAGTATAGG  
-CTCAGTCCAAGCGCTCACCAATTA--GCTCCACTTCAAAGATAGATCTGGCTAC-----  
-----  
-----AGAAGCTTTAGTGAAATCTCCAT-AGAGGAAT  
AGTAAGTAA--AGCATTACTGGCAGGGGGTCATTGGTGGC-ACTGAGAA-GTCTCAAAC  
GTTGGCTGGATGATACATCCTCTC-TGATCCAGCCCTCCAGGAACGGTT-----  
-----TGC  
ACCAC---TTTGGTAGAGCCCTGGAGTTTTAAGATAATTTCTAGTTAAACTCATTACTGT  
TTCTCTGATGCCATTTTCAG--ATTGAAATATAGCTCTGGATTCATTAATGCA









-----  
-----TATTAAA---AAATTACTGAGAAGTGTA-CAC-TCTGAA  
CCTCCAGGATCAATGAGAAAAGCACAAGTCTC-CCA--GATAGGCTATGACAGAAC-CTG  
AGAAGCAATCCAGCAC-----AGAGCTCCTAACTTCTGTATCTACTTAC--CTAAA  
GACGTGTTTTTTGAAATGGGATG

>Bil

ACTCATTAACATCACCATTGAAAGGGGTAACCACATTGTCTCCTCTTCTCTGCTGCATTT  
TCTCTAGCAGTTTATCTAGATCATCAC--CTGTGAAAGAAGTGATGAC-AGAGAGAAGAG  
GATT-ACAAGGAATGAAGCTTTCTTAAACCAGAAGGTCTCAGGGTA---TGGGAGGT---  
GAGAAGTGTGGGTGGAGTGGGGAAGGGTCATGCCAGTTAGATGTGATACTACGAATTGAT  
T-GCCAAGCATTTAGCTTTTTGTTTGATAAGGAGTTCACA-GTTGGTTGCCTCTTTGGTTG  
GTTCCCTATGAGTCC-----  
-----  
-----  
-----  
-----  
-----  
-----  
-----  
-----

-----ATTAAC---AAAATACTAAGAAGTGGA-CTC-TCTGAA  
CCCCTAGGAGCAGTGAGAAAAGCACAAGTCTC--AAGGATAGGCTATGATAAAAACCCTG  
AGAAATAATAAAGCAATTTACTGGGAGAATTGCTGGGTTTTGTATGCACCTTAC--CTAAA  
GATGTGTTTTTTGAAGTGAGATG

>Pgu

ACTCATTAACGTCACCATTGAAAGGGGTAACCACATTGTCTCCTCTTCTCTGCTGCATTT  
TCTCTAGCAGTTTATCTAGATCGTCAC--CTGTGAAAGAAGTGATGAC-AGAGAGAAGAG  
GATT-ATAAGGAATAAGGCTTTAAAAGACCAGAAGGTCCCAGGGTG---TGGGAAGTGAG  
GAGAAATGTGGGTGGAGTGGGGAAGGGTCATGACAGTTAGA-CTGATACTAAGAATTGAT  
T-GC-AAGCATTTAGCTTTTTGTTTGACAAGGAGTTCACA-GCTGGCTGCCTCCATGGTTG  
GTTCCCCGTGAGACC-----  
-----  
-----  
-----  
-----  
-----  
-----  
-----  
-----

-----ATTAAC---AAAATGCTAAGAAGTGGA--C-GCTGAA  
CCCCTAGGAGCAGTGAGGAAAGCGCAAGTCTC--ATGGAGAGGCTATGATAAAAACCCTG  
AGAAGTAATAAAGCAATTTATTGGGAGAGTTGCTAGTTTTTTGTATCCACTTAC--CTAAA  
GATGTGTTTTTTGAAATGAGATG

>Iso

ACTCATTAAYGTCACCATTGAAAGGGGTAACCACATTGTCTCCTCTTCTCTGCTGCATTT  
TCTCTAGCAGTTTATCTAGATCGTCAC--CTGTGAAAGAAGTGATGAC-AGAGAGAAGAG  
GATT-ATAAGGAATGAGGCTTTAAAAGACCAGAAGGTCCCAGGGTG---TGGGAAGTGAG  
GAGAAATGTGGGTGGAGTGGGGAAGGGTCATGCCAGTTAGA-CTGATACTAAGAATTGAT  
T-GC-AAGCATTTAGCTTTTTGTTTGACAAGGAGTTCACA-GCTGGCTGCCTCCATGGTYG  
GTTCCCTGTGAGACC-----  
-----  
-----  
-----  
-----  
-----  
-----  
-----  
-----

-----  
-----  
-----AATAAC---AAAATGCTAAGAAATGGA--A-GCTGAR  
CCCCTAGGAGCAGTGAGGAAAGCACAAAGTCTC---ATGGATAGGCTATGATAAAAACCTG  
CGAAGTAATAAAGCAATTTATTGGGAGAGTTGCTGGTTTTTGTATCCACTTAC--CTAAA  
GATGTGTTTTTGAATGAGATG

>Tro

ATNCATTANTATCACCATTGAAGGGAGTAACCACATTNNCCNTNTNTNTGNTGCATTT  
TCTCTAGCAATTTGTCCAGATCATCAC--NTGAGAAAGAAATGATATC-AGTGAGAAAAG  
GNTT-ATAAGGAATGAGGCGTTCATCAACGGGAAGGTTTCAGGGTGACC-----  
-----AGGGTCATGCCAGTTAGACTTGGCTCTCAGAACGCAT  
CAACCGGGCATCTTGTCTTTATTTAACAAGGAGCTCACA-GCTGGCTGCCTCCATAGTTG  
TTTCCCTGTGAGACC---ATTAAC-AAAATACTAAGAAACC-----CCGA-GGTCT  
TCCCATCCAGACTGA--TTTAAATT--TTTAAATTTCTTTTTAAAAATGTAATAATA  
ATAATTATTTTTAACATTATTTTA-TATTATTATTTTATGTTATTAGGT-AAAGAGGCCA  
CTTTTTGGCCTTATTTCTCATTAAGCCTAAAGTACTGAATGGGCTTTTTTGTCTCAGTCAG  
ACTGAAACCTGTTAAAAACCTT-----CGCCAAGATCCCCACTACATCCTGGGC  
CATCTCCAGTCATTCTGATGTATATCTTGCCAATGGACCCAGATGGCTCTGGGGGAGAAA  
GTGAGACTGGTGGCCTCACACAGATTTCACTTCAATCCAATTCACTTGCACGTCAT  
G-----GAGAAGGAC-----  
--ACATG-ACAA-----TATTAAC---AAAATATTAATAAACAGA-CTC-TCTGAA  
CCCTTGGGATCAGTGATGAAGGCACAAGTCTC---ATGGAGAAGCTATGACAGAACCCTG  
AACAGTAACACTAAAGCTTATTGGCAGAACTGCCGTTTTTTGTGTCCACTTAC--CTAAA  
GATGTGTTTTTGAATGGGGTG

>Ppe

ATTCATTAACATCGCCATTGAAGGGAGTAACCACATTGTCCCCTCTTCTCTGCTGCATTT  
TCTCTAGCAATTTATCTAGATCATCAC--CTGTGAATGAAATGATAAC-AGAGAGAAAAG  
GATT-ATAAGGAATGAGGCTTTCATCAGCCAGAAGGTTCCAGGC-GACC-----  
-----ACGGTCATGCCAGTTAGACTTGGCACTTAGAACTGCT  
T-GCCAGGCATTCACTCTCCATTTGACAAGGCATTCACAAGCCGGCTGCCTCCATGGATG  
TTTCCCTTTGAGACC---ATTAACAAAAATACTAAGAAACC-----CTAA-GGTCT  
TCCCCTCCCAAAGTGA--TTTAAATTTTTTTTTAAACTTCTT-----  
-----TTTATTTTATTATTATTATTA--TTTACTAGGT-AAAGAGGCCA  
-TTTTTTGCCTCATTTCTTATTAAGCCTAAATCACTGAATGGAAG--TTGCCTCAGTCAA  
ACTGAGACCTGTTAAAGACCTTAGCTTGAAAAGGCCAAGACCCTCCACTGCATCCTTGGC  
CATCTCCAGTCATTC-----TATATCTTGCCACTGGACCCAGATGACTCTGGAGGAGAAA  
GTGAGGCTGGTGACCTTGACACAGCCCTGCCCCACATAAATCCAATTCACCTGCAAGTCAT  
GGCATCACCTCCCTGATTTTTTTGGTCTCTTCAAGAAGGAAGGAA-----  
AAACAACAACAA-----TATTAAC---AAAATACTAAGAAATGGA-TAC-TCTGAA  
CCCTTGGAAACCAGTGATAAAAAGCATAAGTCTC---ATGGAAGGGCTACGACAGAA-CCTG  
AAAAGTAATACAGAAGTTTACTGGGAGAGCTGCTGGCTTTTGTATCCACTTAC--CTAAA  
GATGTGTTTTTGAATGGGNNN

>Tvu

NTTCATTAACATCGCCATTGAAGGGGTAACCACATTGTCCCCTCTTCTCTGCTGCATTT  
TCTCTAGCAATTTATCTAGATCATCAC--CTGTGAAAGAAATGACGAC-ACAGAGAAAAG  
GATT-ATAAGGAATGAGGCTTTCATAAACCAGAAGGTTCCAGGGCAACC-----  
-----A-GGTCATAACCAGTTAGACTTGGCACTTAGAACTGAT  
T-GCCAGGCATTCAGTC-----TTTGACAAGGAGTTCAC-----GGC-----TGGCTG  
TTTCCCTTGTGAGACC---ATTAAC-AACATACTACGAAACC-----CTGA-GGTCT  
TCTCCTCCAGATTGATTTTTTAAATTTTTT---TATTTCTTTCT-----  
-----ATGTTA--TTATTATTATTATTGTTTTTACTAGGT-AAAGAGGCCA  
-TTCTCTGCCTCATTTTTTATTAAGCCTTAAACACTGAATGGGCA--TTGCCTCANTCAA  
ACGGAGACCTGTTAAAGACCTTAGCTTGAAAAGGCCAAGATCCCCACTTCATTCTGGGC

CATCTCCATTCATTATGATCTATATCTGGCCACTGGAC-----TTGGAGGAGAAA  
GTAAGGCTGGTGACTCTACACAGCCC-TCCCCACTTAAATCCAATTCATTTGCAAGTCAT  
GTTATCATCTCCCTGATGCTATGGTCCTCTTCCAGAATGAAGGAC-----  
---AAACAACAA-----TATTAA-----TATACTAAAAAATGGA-CAC-TCTGAA  
CCCTTGGGATCAGTGATGAAAGCACAAATCTC---ATGGAGAAGCTATGACAGAACTCTG  
GAAAGTTATACAGCAGTTTACTGGGAGAGCTGCTGGCTTTTGTATCCACTTAC--CTAAA  
GATGTGTTTTTGAATGGGATG

>Mr o

N-TCATTAACATCGCCGTTGAAAGGGGTAACCACATTGTCCCCTCTTCTCTGCTGCATTT  
TCTCTAGCAATTCATCTAGATCATCAC--CTGCAAAGAAATGATAAC-AGAGAGAACAG  
GATT-GTAAGGAATGAGGTTTTTCATAAACCAGAAGGTTCCAGGGTGACC-----  
-----AGGGTCATTCCACTTAGACTTGGCATTTAGAACTGAT  
T-GCCAGGCATTAATC-----TTTGACAAGGAGTTCACA-GCTGGCTGCCTCCATGTTTT  
TTTCCCTGTGAGACC---ATTAAC-AAAATACTAGGAAACC-----CTGA-GGTCT  
TCCCCCCCCAGACTGATTTTTTAAATTTCT---TATTTCTTTTT-----  
-----ATTTAATTATTATTATTATCATTTACTAGGT-AAAGAGGCCA  
-TTCTCTGCCTCAATTTTTTAATAAGCCTTAATCATAGAATGGGTG--TTGCCTCAGCCAA  
ACTGAGACCTGCTAAACATTTTAGCTTGAAAAGGCCAAGATCCCCACTGCATCCTGGGC  
CATCCCCAGTAATTCTGATCTATATCTTGCTACTGGACCCAGATGGCTTTGGAGGTGAAA  
GTGAGGCTCATGACTTTGTACAACCCTCTCTCACTTAAATCCAATTCACTTGCAAGTCAT  
GGTATCACCTCCCTGATGTCATGGTCCTCTTTGAGATCAAAGACAAAGAATAACAACAG  
CACTATGAGCAAAA-----TACTA---AGAATACTAAATACTAAAATAC-TCTGAA  
CCCCTGGGATCGGTGATGAAAGCACAAATCTC---ACAGATAGGCCACAATAGAACCCTA  
AATGGTAATACAGCAGTTTGCTGGGACAGCTGCTGGCTTTTGCATCCACTTAC--CTAAA  
GAGGTGTTTTTGAATGGGATG

>Vur

-TCATTAAGCATCGCCATTGAAAGGGGTAACCACATTGTCCCCTCTTCTCTGCTGCATTT  
TCTCTAGTAATTTATCTAGATCATCAC--CTGTGAAAGAAATGATGAC-AGAGAGAAGAG  
GATT-ATAAGGAATGAGGCTTTCATAAATCATAAGGTTCCAGGGTGACC-----  
-----AGGGTCATGCCAGTTAGACTTGGCACTTAGAAGTGAC  
T-GCCAGGCACTCAGCCTTTGTTTGAC--GGAGTTCACA--GTGATTGCCTCC-TGGGTG  
TTTCCCTTATGAGACC---ATT-AC-AAAATAGTAAGAAACAAAATAGTAACTAA-GGTCT  
TCCCCTCCCGATTGATTTTCAAAA-----  
-----TATTTTTTTNAATATTATTATTN--TTCCTAGGT-AAAGAGACCA  
-TTCTCTGCCTCATTTCTTATTAAGCCTTAATCACTGAATGGGCA--CTGCCTCAGTCAA  
ACTCAGACTTGTTAAAGACCTTAGCTTGAAAAGGCCAAGGTCCCCACTGCATCCTGGGT  
CATCTCCAGTG-TCCCTGATCTGCATCTGGCCACTGGACCCAGATGGCTCGGGAGGAAAGA  
GTGAGGCTGGTGACTTTGCACAGCCCTCCCTCATTTAAATCCAATTCACCTACATGTCAT  
GGCATCACCTCCCTGATGGGACCATGGGGTCCCTTTTGTGAACAACGG-----  
----ATAAACA-----CAAC---AGTA-ACAACAATATT---AAC-TCTGAA  
CCCCTAGGATCAGTGGGGAAAGCACAAAGTCTC---ATGGCTAGCCTATGATAGAACCCTG  
AAAAGCAATACAGCAGTTTACTGGGAGAGCTGCTGGCTTTNGTATCCACTTAC--CTAAA  
GAGGTGTTTTTGAATGGGATG







AG----AGATTGATTATAAAC-----  
-----  
-----  
-----  
-----  
--TATAT--ATGTTTTAAAACAACCTATAGAATATAGCCTTT--GTTAAAATAACCCAGT  
-----ATCCCAAGACCTACCATTGAAGTTAGA  
AAAG-CTCATCTAGAAA-CAGACCTAACAGTTGTTCTAGCACTCCCACAAGGAGCCAACG  
AATGCTTTATAAATGTCCCAGTG-----TTTCCTCTCTTCATTT----GTC-  
--TGTTCTTGGTTTGGT-----CTTATAAAACTCTTACTACCTTCTGT  
CCTAGAATTGATATTTAATACTAATAGATTCTAAGGCAAAAGAGTGGCAAGAGTTAGGCA  
AGCAGGCTTAAGAGACTTGCCAGACTTATACAGCTAGGAAGCAGCTGAGGCAAGATTTG  
AACCAGGTCTTTTTGAATCCAGGCCTGGGCCCTCTATCCACTGTGCTACCTAGCTGCC  
--TCTC--TGTGATCAGTTTTGATTCAG--GAAGTGTATTAGA--ATA-CTTAGAGT-  
-----CAAGATTGCTC-TGGCAGGGTCC-AAGCCTTTGTGTGTTCCACAG-GATGG  
AAAAGTCTCCTGAGCCTCTGTTGGTCTGTTGAGCTACATCTCACAGACAAAACA--GTCA  
T-----GGTGTGTGTAATCTTTAAGCT-AGTTATAGAAAGG-GA-TCATT-GTT---TA  
GGATTGG-CTTTTGCAAACCTCCATTCCCAACAATCNCGGNGTAACCAAAACAAAAAAA-  
-----TCCTAAAGTTGATTAGTTTTATCCCAAGATCCTTTTAGGATAAAGAATACAGT  
CAGTAGTACAACTCAGGAACTGAAAATGTAGGAGAAGATCAAATAGGTGGAAAGAAGAA  
AG----TAAGGCATAAAAGTGTTTATAAAAATGTATATATGTTTACTAAGGTT-GAAGTG  
GCAGGCCA-AGCAATATGGAAAATGCAAGACATT--TTAGAATTAA-----TTT  
TTTTTTAAACCCTTACCTTCCGTCTTAGAGGCAATATTGTGTATAGGTTCCAAGGCAGAA  
GAGTGATAAGGGTAGGGCAATGGGGGTCAAGTGACTTGCCATCGTCCACACGGCTGGGAA  
GTGTCTAAGGCCAGGTTTTAACCTAGGACCTCCTGTCTGTAGGCCTGGCTCTCAATCCAC  
TGAGCTACCCAGCTTTCCCC--TTTAGAATTAA--TTTAAAACAATTATGGCACAAAC  
AGCAACACTTTTTTA-AGGTATCCTTCTGTGTTTCTATGTGCAATTCAC--CTATTTTTCC  
TTCCCAAGAACTTTA-TTTTAA-CTACAATTGACAACCTATATATTT--CAG--CTTCCCA  
GTATAAATCCAGTGCTTCTCCTTCTGGAAGT  
>Cfu  
TATTGAGACCTGCTGTCACCTAATGGGATGTCACAG--GTAAACAAGTCAATAGGTTACTT  
ATATACAGATTAACTATGAAG-----  
-----  
-----  
-----  
-----  
--TATGT----TTTCTAAAACAACAGTAGAATAGCTCATTGAGGTTAAAATGCTCATGT  
-----CTG-AGATAATACAACCTTGGTCCTTCTTGTCCCAGGACTTACCATTGAGGTTAT-  
-----AAGAAACAAAACAGATCCCAGAGTTGTTCCAGCTCTCCCACTAGGAGCCAATG  
AATGCTATAGAAATACCGCCAGAG--ATTTCCCTGGTTT--CTTCCTTCATTTGTCTGTC-  
-----  
-----  
-----  
-----  
-----TGTGCTCAGGTTTGTTCAG--GA--GTATTAAA--ACACCTTTGACTT  
-----AGAGCCAGGATTGCTATTGTCAGGGTCC-AAGTCTTTTTGTGTTCCACAG-TGTAG  
AAAAGACTGCTGAGCC-GCATCGATCTGTTGAGCCCTACCAAACAAGCAAAGCACAATCA  
CCATCTGAGTCATCATTCCTTCAAGCTTAGTAATAG-AGACTGATTCATTTTATT---TG  
AGATTGTCCTTCCACAACTCCTTTCCAGCAATCCTGGTGTCAACAAAACACAAATAAA  
AAAA--TCCTGAAGTTGATTAATTTTATCC-CAAGATCCTTTCAGGATGAAGAATGAAGT  
CAGTAATAAAAGTATAGGAATTGAAAATGCAGGGGAAG--AGAAGGGAGGCAGAAAGAA  
AG----TAAGGCTTAAAATA-TCCACAGGAATTTATCTGTTTTTACTAAGGTT-GAAGTG  
TTAGGCCA-AGTGATATGAAAAGTGGAGGGCATT--CTAAAATTAG-----

-----  
-----  
-----  
-----TCCTAAAACAATGA-GTACCAC  
AGCAACACTTTTTT-AGG---TCTCTTATATTGCTGTTTGTAATTCAT--CT-GTTTTCT  
TCTCTAAGTACTTTCAGTTTTAA-CTACAGTTGATGACTATATATGYTTCAG--CTTCCCA  
GTATAAATCCTAGTGCTTCCTCTTCTGGAAGT

>Dg1

TATTGAGACCTGCTGTCACCTAATGGGATTTACAG--GTAAGCAAGTCAGGGAGCTACTT  
AT----AGATTAACTACAAAC---TATGT---CAGCTGAAGCAGGTGCTGTGGCATGCTT  
AGAGCTTGGGCAGGCATCAAAGACACCAAGGTCGTCCACTGCATCCTGGACCATCATCTG  
TCGTCTTGACTTTTTGTTCTACCACTAGACTTGGATGACTTTAAGAAGAGAGAGTG-AGTC  
TGATAACTTTGTG-----AATCCACAAACAAGTCAGGACATCA  
CTAT-CCATGTCATTGGTCCTCTTTTT-AAAAACCAAACGGATGAACAA-----GTTA-  
--TATGT-----ATTCTCAAGCAATGGTGGAAATATA-CTGCTTGTGAGATTAAGCTCCT  
CATGTCTG-AGGTAACCCAACTTGATCCTTCTTGTGCCAGTCCCTACCACTGAGGTTATG  
AAAGACTCAAAAAACA--GACACA--AAAGTTGATCTACCTCATCCACTAGGAACTGGTG  
AATACTTTAGAAATATCCCAATG---ACTTCCTGGTTTTCTTTCTTCCTCGTTA-----TC-

-----  
-----  
-----TATGCTCAGTTTTGATTCAG---GG-GAATACTAAA--ACATCTTTGACTT  
-----ANAGTCAGGATCACCA-TGTCAGGGTCC-ACATCT--GTGTGTTCCACAG-TGTGG  
AAAAGACT----AACCTCCATTAGTCTGTCCAGCCATANTGCACAAGCAAA-CATGATC-  
-----TGGGGCACAGTTATCTTCAAGCCGNTGGTATAGA-CTGATTCTTTTTGTT--TG  
GGATTGTCCCCCTGCAAACCTTAATTCCCNAAAATCCTAGNGTAGTCAAATTAATAAAAAA  
AAAACACCCTGAAGTTGATTAATTTTCATCC-CAAGATC-TTTCAGGATGAAGAATATTGC  
CAGTAGTGAAAGCATAGGAATTGAAAATGCAGGGGGAG--GAGTAGGTAGGTAGAAAGAA  
AG----TCAGGTTTGAAGGTGTCTACAGAAATGTTTCTATTTTTACTAAGGTT-GAAGTG  
TTCAGGCTGGACGATAT-AAAAATGCAGGGCATT--TTAAAATTAG-----

-----TCATAACAAGTATGGTACACA  
AGCAAC-TTTTTTT-AGGTATTCTTCTGTATTAGTATGTATAGTTTAT--CTATTTTTCT  
TTCTGCAGTACTTT-GTTTTAA-GTACAGTTGATGACTATATATGTTTCAG--CTTCCCA  
GTATAAATCCCAGTGCTTCGTCTTCTGGAAGT

>Nty

TACTGAGACCTGCTGTCACCTAATGGGATTTACAG--GTAAGCAAGTCAGGAAGCTACTT  
AT----AGATTAACTATAAAC---TATGT--TATTTGAAGCACGGGCTATGGAGTTCTG  
AGAGCTTAGTTAGGCATCAAAGACACTGAGATCATCCACTGCATTCTGAGCCATTGCAAG  
TTGCCCTTGATGTTTGTCCCTGCCACTAGACTTTGAGGACTTT-----  
-----GTGCAGCTCTACCTCATTTAAATACAATTCACACAGCAGA-TGAACAG--  
-----CAA-----GTTA-  
--TATGT-----GTTCTAAAGCAACTGTAGAATATAGCTGGTTGTTGAGGTTAAACTCCT  
TGCATCTG-AGATAACCTAACTTGATCCTCCTCATCCCCAGACCTACCATTGAGCTTAGG  
GGACACTCTAGAAA----CAGACCCAAAAGTTGTTCCAACCTCATCTACTAGGAGCCAGTG  
AATGCCTTAGACATTTCTACTG---ACTTCCTGGTATCCCTTCCTGTATTT----GTC-



-----TGTGCTCAGTTTTGATTCAG--GGGATGTATTAATAAACACTTTTTGACTT  
-----AGAGTCAAGATTGTTA-TGCCAGGGTCC-AAATCTTTGTATGTTACACAG-TATAG  
AAAAGACTGTTTAACTCCATTAGTCTGTTCAACCACACTGCACAAGCAAAACAAAATTG  
CCATCTGTGGCATCATTATCTTCATGCCTGGTGATAGAGC-CTGATTCATTTGTT---TG  
GGATTGTCCTACTATAAACTCTATTCCCAGCAGTCCTGGTGTAAATCAAAGTAAAAA  
A-----TCCTAAAGTTGATTAATTTTATCC-CAAGATCCTGTCAGCATGAAGAATATAGC  
TAGTAATGAAAGCATAGGAATTGAAAATTCCAGGGTTCA-GAAGAGTAAGTAAGC-AAAA  
AGAAAGTAAAGTATGAAGATGTCCACAGAAATGTTTCTCTTTTTACTAACGTT-GAAGTA  
TTGGTCCA-GACAATATGAAAATGCAGGGCACT---TTAAAATTAG-----

-----TCTAAAACAATTATGGTATACT  
AGCAATAGTTTTT--AAGGTATCTTTTGTGTTACTTTGTGAAATTCAT--CTATTTTTCT  
TTTCCAAGAACTTT-----ACACTTGATGACTATATATGTTTCAG--CTGCCCA  
GTATAAATCCCAGTGCTTCTCTCTGGGAGT

>Pta

TATTGAGACCTGCTGTCACTAATGGGATTTACACAG--GTAAGCAAGTCAGGAACCTACTT  
ATTTATAGATTAATTGTAGAC---T--GT---CAGCTGAAGTACACACCATGGAGTCCTT  
AAAGCTTGTTTCAGGTATCAAAGACGCCAAGGTCATCCCCTGCATTCTGGACTGTTGCCA-  
TTGTCTCAACTTTTGTCCCTGTCACTGAACTTTGATGACTTA-GAAAGACAGAGTG-AGGC  
TGATGACTTTGTATAGCTCTGCCTTACTTAAATCCAGTTCATGAGCAAGTCATGACATCA  
CCAT--GATATGATTGGTTCTCT---AAAAAATCCAAGACAAACAGTAA-----GTTA-  
--T--CT-----GTTCTAAAGCAATTTTGGAAATATAGGTGTTTGTGAAGTTCAGCTCCT  
CATGTCTGGGGACAACCTTAACTTGATTCTTCTTGTCCCAA-CCTACTATTGAGGTTGTG  
AAAGATTTATCTGGAAA-CAGAACC-AAAGTTGTTCTGGCTCATCTGTTAGGAGCCAATG  
AATGCTTTAGAAATTTTCCAGTG---ACTTCCTAGTTTCTCTTCTTTTCAATTT-----

-----CAAATCT---TT-CAGT-TTAAA--ACACCTTTGACCT  
-----AGGGTCAAGATTGCAA-CGTCAGGGTCC-AAGTCTTTGTGTATTT-----  
-----AACTTCCATTAGTCTGTTTCAGCCACACTGCACAAGGCAAACACAATC-  
-----TGTGGCATCATTATTTTCAAGCTTGGTGATAGGGG-CTGATTCATTTGTT---TG  
GTATTGTCATACTATAAACTCTATTCCCAATAATCCTGGTGTGATCAAAGTAAAAA  
AA-----TCCTGAAGTTGAGTAATTTTATTCT-AAGATCTTT-CAGAATGAAGAACACAGC  
CNATAATAAAAGCATAGAAATTGAAATTGCAGAGGGAA--GAGTAGATAGGTAAGAAAGAA  
AG-----TAAAGCATGAAGTTGTCCACAGAAATAGTTATATTTTTAATAAGGTT-GAAGTA  
TTAGAACA-GACAGTATGAAAAGTGAATGCACT---TTTAAATTAG-----

-----CCTAAAACAATTAGGTTACACT  
AGCACCCTTTT--AGGTATTCTCTGTTATTCT-----GGAGTTCAT--TTATTTTCTT  
TTCACAAATACTTT-----AA-GTACAATTGATGATTATTTATGTTTCAG--CTTCCCA  
GTATAAATCCCAGTGCTTCTCTCTGGAAGT

>Dgo

TATTGAGGCCTGCTGTCACTAATGGGATTTACACAG--GTAAGCAAGTCAGGAACCTACTT  
ACTTATAGATTAACTGTAAAC---TGTGT---CAGCTAAAGTACACACCATGGAGTCCTT  
AAAACCTTGTTCAAGCACCAAAGACGCCAAGGTCATCTCCTGCATCCTGGACCATTGCCA-  
TTGTCTCAACCTTTTGTCCCTGTCACTGAACTTTGATGACTTA-GAAAGACAGAGTA-AGGC  
TAATGACTTTTTTATAGCCCTGCCTTACTTAAATCCAATTCATGAGCAAGTCATAATATCA



ACCCATACGTTTTGTAGGTATCCTTCTGTGTTGC-----CTATTTTTCC  
TTCCCAAGTACTTT-----AA-GTACAGTTAATGACTATATATTTTTTCAG--CTTCCCA  
GTATAAATCCAGTGCTTCTCTTCTGGAAGT

>Mr0

TATTGAGACCTGCTGTCACTAATGGGATTTACAG--GTAAGCAAGTCAGGAAGCTACTT  
AT----AGATTAACTATAAAC---TCTGT---CAGCTGAAGCAGGTGCTGTGGGGCACTT  
AGAGCTTGGTCAGGCATCAAAGACATCAAGGTCATCCACTGCATCCTGGGCCATCGCCAG  
TCCTCTTGACTTTTGTCCCTGCCACTAGACTTTGATGACTTAAGAAAGACAGAGTG-AGGC  
TGATGACTTTTATGCAGCTCTGCCTCACTTAAATCCAATTCATGAGCAAGTCAAAATATCA  
CCTG-GGATGCCACTTGTCTCTTTAAAAAAAAAAAAAGAGATGAAGAACAA-----GTTA-  
--TATGT-----GTTCTAAAGCAACTATGGAATATAGCTGCTTATTGAGGTTAAACTCCT  
TTTGTCTG-AGATAACCAGACCTCCCGTT-----

-----GATGTTGTTCCAGTTCATCTAGTGGGAGCCAATG  
AAGGCTTTAGAAATTTCCAGTG--ACTTCTGGTTTCCCTTCTTTCATTT---GTC-

-----TGAT--CAGTGTTGATAGAG--GTAGAATATTTAAA--ACACCTTTGATTT  
-----CGAGTCAAGATTGCTA-TGTCAGAATCCACAGA-----  
----GACTATTGAAACTCCATTAGTCCTTTTCAGTGATACTGCACAAGCAAAACACGGTCA  
CCATCTGGGGCATCATTATCTTCAAGCCTGCTGGTAGAGA-GTGATTCATTTGTT---TG  
AAATTGTCCTTCTGAGGA--CTATTCCTAGAAATCCTGGTGTAAT---TTTTTAAAAAA  
-----TCCTAAAGTTGATTAATTTTATCC-CAAAATCCTTTTCAGGGTGAAGAATACAGC  
CAGTAATGAAGGGATAGGAATTGAAAATGCAGGGGGAA--GAGTAGATAGGTAGAAAGAA  
AG----TAAGACATGAAGGTGTCTACAGAAATGTTTATATTTTTTACTA-GGATTGAAGTG  
TTAGGCCA-GACA---TG--AAATGCAATGCATT---TTTAAATTAG-----

-----TCTAAAACAATTATGGTACACT  
AGCTACACTTTTTTT-AGGTATCCTTCTGTGTTACTATGTTCAATTCACCTGTA--TTTCT  
TTCCCAAGTATTTT-GTTTTAAATTATAGTTGATGACTATATATGTTTTTCAG--CTTCCCA  
GTATAAATCCAGTGCTTCTCTTCTGGAAGT

>human

TATTGAGACCTGCCGTACCAATGGGATGTCACAG--GTAAA-----CTGGTGTGTGTGGG  
-----TATAACT-----

-----  
-----  
-----  
-----  
-----  
-----  
-----  
-----

-----TGTGAATTAAATAATGTATGAAATGCCAGTTTACAT  
GACAGATTATTCTTCCAGACCTATTTAGTATGTGAAGCCATTACTAGTTGTATTTTTTT  
CTACCCA--AGCACAGCACTCTAATTATGT--TGGCCTTCTGCATTTTAG--CTTCCTA  
GCATAAACCTAGTG--CCTCTTCTGGAAAC

MARKER 96

>WALLSI3

-----  
-----  
-----TTGTTGTTGTTGTTTC  
GTCCTTCGTTTTTC--GAAGAGGACCAATGACATCAT-GGGGTG--ATGTCTTGA  
GCGCATGAATTGGATTT-AAGTGAGGCAGAGTTGCACAAA--GTCATCAGCCTCA  
TCTTCCAGAGTC-ATCGAAGTCCAGTGG--CAAGACAAAAGTCAGGATGACTGG  
CCCGGGATGCA-----

-----  
>WALLSI1A

-----  
-----  
-----TGTTTGGGCCCTGAT--TGGCTCAGAGTGAATGTAAATAGCAATTGTT  
-CTGTTT--TGGCCAGAAACCCTGAGGGTCTTCCCCTCCAGATTGATTTTTTTT  
TTTTGACTAGGTAAAAGAGGCCATTCTTTGCCTCATTCTTACCTAGCCTTAATCA  
ATGGGTGTTGCCTCAG-----

-----  
>WSINE1

-----  
-----  
-----GAGGGCAGCTAGGTGGTG  
CAGTGGATAGAGCACCAGCCCTGGAGTCAGGAGGACCTGAGTTCAAATCCAGCCTCAGAC

ACTTACTAG-----CTGTGTGACCCTGGGCAAGTCACTTAACCCCAATTGCCTC---  
-----AAAAAAAAAAAAA-----

>Mdo

TGGTTCACAGACAGAGCTGGCCATTGTTACTGCAGACTTTGTCAAGGTAC---TCTCTC  
T-TTCAGTTATTGCTGGTACAGTGACC---TGGGATTGAGATCCTTTGG-----  
-----TTCTCAAT---GGGGGTG-----

-----ACCCATT---AGGGACTAACACAGAGATATCAGTGGCTCA  
TTTTTGGTTTTGCCAAGCATAA-----

-----GAAATCTGGTTTAAAGCCAA-GCTAA---AAC  
TCATCTTAATCCTTTGTCTACTAGTCTCCACCGCAGCCTGGCAGCTTTAGTTGGTTTAAAC  
CACAAATGAATCAAATGGGA-----TTCTTCCAGAGAGGACCAAGAGTTGGCTTCTTGTT  
T--AGTCTTTTCTCTCTC-----TACAGATATATGACCTCTCAGTTGATGCATTG  
AGC

>Dvi

TGGCTCACAGACAGAGCTGGCCATTGTTACTGCAGACTTTGTCAAGGTACTGACTGTCTC  
C-TTCAGTTATTGCTGTTATAGTGACCCTTCTGGGATTGAGATCCTTTGG-----  
-----TTCTCAAT---GGGGATG-----

-----ACCCATT---AGGGACTAACACAGAGATATCAGTGGCTCA  
TTTTTGGTTTTACCAAGCATAA-----

-----GAAATCTGGTTTAAACCAA-ACTAA---AAC  
TCATCTTACTCCTTTGTCTACTAGTCACCACTGAAGCCTGACATGTTTAAATTGGTTTAAAC  
CACTAATGAATCAAATGGGA-----TTCTTCCAGAGAGGACCAAGAGTTGGCTTCTTGTT  
T--AGTCTTTTCTCTCTC-----TACAGATATATGACCTCTCAGTTGATGCATTG  
AGC

>Mnu

TGGCTCACAGACAGAGCTGGCCATTGTTACTGCAGACTTTGTCAAGGTACTGACTGTCTC  
C-TTCAGTTATTGCTGTTACAGTGACCCTTCTGGGATTGAGATCCTTTGG-----  
-----TTCTCAAT---GGGGATG-----

-----  
-----ACCCATT---AGGGACTAACACAGAGATATCAGTGGCTCA  
TTTTGGTTTTACCAAGAATAA-----  
-----

-----GAAATCTGGTTTAAACCAA-ACTAA---AAC  
TCATCTTACTCCCTTGTCTACTAGTCTCCACCGAAGCCTGACATGTTTAATTGGTTTAAAC  
CACTAATGAATCAAATGGGA-----TTCTTCCAGAGAGGACCAAGAGTTGGCTTCTTGTT  
T--AGTCTTTTCTCTCTC-----TACAGATATATGACCTCTCAGTTGATGCATTG  
AGC

>Rra

-----CTGGCCATTGTTACTGCAGACTTTGTCAAGGTA----CTGTCTC  
C----TCCTGGTGTGGCCCACTGACCCTATGCTGAT-GGGACTCCTTGCTTGTGG-CAT  
A---CTTCAGAGGGTCACTCAGCAAAGGCCCCC-----  
-----  
-----  
-----  
-----  
-----  
-----

-TTCAGG-----  
-----  
-----  
-----  
-----  
-----  
-----  
-----

-----GA---TTG-----TCCCA-GATCT-----  
-----CTGGCCC-TCTCCTTGTCTCCACCTTGGTCTGGCATCCTGGGCTGGCTCATT  
CTCTAAAGGAGTCGGGGAAG-----TTCTTCAAGGGAGGATCAAGAGCTGGCCTCTGGTT  
TTTAGTCCTCTCTCTATTTCTCTCCCCACAGATATACGACCTCTCTGTGGATGCTTTG  
AGC

>Dgl

TGGCTCACAGACAGAGCTGGCCATCGTACTGCAGACTTTGTCAAGGTA----CCGTGTC  
C----TCTTGGGGTTGGCACAATGACCCTGTGATGGTTGGGAGCCTGTACTAGCCCACAG  
TGTGCTTCAGAAAGCTTCTCAGT---GGGGGTG-----  
---ATCTATTGTC---GAAGAGGACCAATGACATCACAAAAGTG---ACATCTTGACTT-  
GTGTGTGAATTGCTTTT-AAGTGAGACAGAGCTGCTCAA--GTTGGCAGACCGACTCTG  
TCCTCT--AGTC-ATTGAAGTCCAGTGG--CAAGACA-TAGG--TTAAGACAAAGAACCT  
CTGTGGCTCATTGTTTAGGTTTTGA---TGGCTTAGAATGAATGTAAATTGCAATTGTT  
TACTGTTCTGTTGTCTCAGATCTGTTAGGG-----  
-----

-----AATAAC-----GGCTCC  
TTTTCCTTTTGCCAAGCATAA-----  
-----  
-----

-----GAAA-----TCCCAAGTTAT---AAC  
TCATTCTAATCCTTTGTCTTCTAGTCTCCATCCCAGCCTGGTAGCCTTGGTTGGTTTAGC  
CACTAATGAATCAGCCGGAG-----TTCTACCAGACAGGACCAAGAGTTGGCTTCTTATT  
G--AGTTTTTTCTCTCTCTG-----CCCCACAGATATACGACCTCTCTGTTGATGCCTTG  
AGC

>Nty

TGGCTCACAGACAGAGCTGGCCATCGTAACTGCAGACTTTGTCAAGGTA----CTGTCTT  
C-TTCTCTTCATGCGGGTACAAAGACCCTATGGTGA-CTGGAGCCTCTGCTAGCCAACAG  
TATGCTTCTGAAAGCTTCTAAAT-----CAGG-----TTACGC---ATTGTTGTTGTT  
ATCCTTCATTCTT---GAAGAGGGCTGACTACATCACAAAGATG---ATGGTTTGACCT-

GTGTGTGAATTGTTTTTTTTTTAAGTGAGTCAGTTGCGCAAAGTCAT----CAGCTTTAC  
TCCTCC--AGTC-ATTGAAGGCCAGTAG--CAAGACATAAGT-CATGATGCCAAGCCTCT  
ATGGCTTATT--GTTTAAGTTTTAA---TGGCTTAGAATGAATGTAAATAGTAATTGTT  
TTCTGTTT---TGGTCAGAACTTTGAGGGTCTTCCCTCTCCACATTGATATTTTT---  
-----TCATGGTAAATTTGGCCATCTTTTGTCTCANATCTTAGTTATTGAAA-----  
---GGCCATCACCTCAT---ATCCATT---AGGGACTAACA---GATTTTCAGTGGCTCA  
TTTTGCTTTTGCCAAGCATT-----

-----GAAA-----TCCTA-ATTAA---AAC  
TCATTTTAATCCTTTGTCTACTAGTTTCCACCTCAGCCTGA-----TTTAGT  
CACTAATGAATCAGATGAGG-----TTCTGCCAGAAAGGACCAAGAGTTGGCTTCTTGT  
T--ATTCTTTTTTCTCTCTA-----TCCTACAGATATACGACCTCTCTATTGACGCCTTG  
AGC

>Pta

TGGCTCACAGACAGAGCTGGCCATCGTCACTGCAGACTTTGTCAAGGTA----CTGTCTT  
C----TCTTAGTGTTGGTA-----TGGTGG---GAGTCTCTGCTT-----  
-----CAGAAGGCTTCTCT-----GGGAGC---AACCCACT---GGTGATGGCGGTC  
ATCCCTCGTTCTC---GAAGACGACCAGTGCCATTGCGAAGGTG---TGATTTGACTT-  
GGATGTG-----AAGTGAGACAG--CTGCTCAGA--GTCAT-----  
-----ACATA-TGTT--AAATTGGAAAGCCTCT  
GTGACTTAAC-----TATTGAGG---CTTATGTGAATGTAGAT-AAGAGGGATCGTT  
TTCTGTTT---TGCTCAAAAA-----TCTTCCCCTCCTAGATGGATGTTTTT---  
-----TGAAGATACATTAGGTCATCTTTTGTCTTAATTCTTACTTATTGAAA-----  
---AGGCATTGTCTCAG---ATCCATT---AAGGACTAACA---GATTTTCAGTGCCTCA  
TTTTGCTTTTGCCA-----A-----

-----GAAA-----TCCAA-GTTAA---AAC  
TCATTCTGACACTTTGCC---AGTCTCTACCTTAGCCTGGCAGCTTTAGTTT-AGCAGT  
AATAGGGTAGGT---GAAC-----TTCTGCCCGAGAGTATCAAGGGTTGGCTTCTTATT  
---AGTGTTTTCTTTCTCTA-----CCCTACAGATATACGACCTCTCTGTTGATGCCTTG  
AGC

>Scr

TGGCTCACAGACAGAGCTGGCCATCGTCACTGCAGACTTTGTCAAGGTA----CTGTCTC  
C----TCTTAGTGTTGGTA-----TGGTGG---GAGTCTCTGCTT-----  
-----CAGAAGGCTTCTCT-----GGGAGC---AACCCACT---GGTGGTGATGGTC  
ATCCCTCCTTCTC---GAAGAGCACCAGTGCCAGTGCAAAGGTG---TGATTTGACTT-  
GGAGGTGAATTGTTTTTTAAGTGAGACAGAGCTGCTCAGA--GTCAT-----  
-----ACATA-CATT--AAATTAACAAGCCTCT  
GTGACTTAC-----TATTG-----AGGCTTAGTATGAGTGTAGATAGGGATCGTT  
TTCTGTTT---TGCTGAAAACTCTGAGGGTCTTCCCCTCCTAGGTGGATGTTTTT---  
-----GT-AAAGTTGATTAGGCCATCTTTTGTCTTAATTCTTATTTATTGAAA-----  
---GGAAGTTGTCTCAG---ATCCATT---AGGAACTAACA---GATTTTCAGTGGCTTA  
TTTTGCTTTTGCCA-----G-----

-----GAAA-----TCCAA-GTTAA---AAC  
TCATTCTAACACTTTGTCTGCCAATCTCTACCTTAGCCTGGCAGCCTTGGTTT-AGCAGT  
AATGGGTTATGT---GAG-----CTCTGCCTGAAAGTGTCAAGAGTTGGCTATTTATT  
---AGTCTTTTCTTTCTTTA-----CCCTGCAGATATACGACCTCTCTGTTGATGCCTTG  
AGC

>Mfa



TGGCTCACAGACAGAGCTGGCCATAGTCACTGCAGACTTTGTCAAGGTA----CTGTCTC  
CCTTCTCTTAGTATTGGGA-----TGGTGG----GAGTCTCTGCTT-----  
-----CAGAAGACTTCTCT-----GGGAGT---GACCCACT---GGTGGTGGGGGTC  
ATCCCTAATTCTC---GAAGAGGATCAGTGCCATTGTGAAGGTG---TGATTTGACTT-  
GGATGTGAGTTCTTTTT-AAGTGAGACAG--CTGCTCAGA--GTCATCAGCCTCATTCTG  
TCCTCTGGAGTC-TTCAAAGTCCATTGATAAGACATA-TATT--AAGTCAGCAAGCCTCT  
ATGACTTAT-----TGTTG-----GGGTTTAGAAGGAGCGTAAATAGGGATGGTT  
TTCTGTTT---TGCTCAGAAACTCTGAGGGTCTTCCCCTCCCAGATGGATGTTTTT----  
-----GTGAAGGTAGATTAGGCCATCTTTCATCTCAATTCTTAGTTATTGAAA-----  
---GGGTGTTATCTCAG---ATCCATT---AG-AGCTAACA----GA-----  
TTTTTGCTTTTGCCA-----A-----

-----GAAA-----TCCAA-GTTAA---AAG  
TCATTCTAACGCTTTGTCTGCCAATCTCCACTTTAACCTGGCAGCCTTGTTTTTAGTAGT  
AATAGGTTAGTT---GAGC-----TTCTGCCCGAGAGGATCAAGAGTTGGCTTTTTTATT  
---AGTCTTTTCTTTCTCTA-----CCCTGCAGATATACGACCTCTCTGTTGATGCCTTG  
AGC

>Bi1

TGGCTCACAGACAGAGCTTGCTATCGTTACTGCAGACTTTGTCAAGGTA----CTGTCTC  
C-TTCTCTTGGTGTGGTACAATGACCCTGTGGTGATTAGGAGCCTCTTCTAGCCAATAG  
TGACTTCAGAAAGCTTCTCAA-----GGGGGT---GACTTACC---TTGTTGTTT----  
-----A-TTCTC---CAAGAGAACCA---AAGACATGAAGGTG---ATGCTTTGATTT-  
GTATGTAAATTGTTTTT-AAGTGAGACTGAGCTGCTTAAAA-GTCCTCAGCCTCACTTTC  
AGCTCCAGAGTCATT-GAAGTCC--AGTGACAAGATA-TAAATCAAGAAGACAAGCCTTA  
ATGACTTACA-----AGGTTTTGA---TGACGTATAATGAGAATAAAAAGCAATTGCT  
TTCTGTTT---TGGTCAGAAACTTTGAGGGTCTTCCCTTCCCAAATTAATATTTTT---  
-----GTGATGGTAAATTAGACTTTCTTTTGTCTCAATTTTTTAGTTCTTGAAA-----  
---GTGTGTTGCCTTAG---GTCCA-----GATTTTGGTGAC---  
TTTTGCCTTTTCCAAGTATGA-----

-----GAAA-----TTCAA-GTTAA---AAC  
TCATTCT-ATCCTTCATCTATTAGTCCTCACTTCAGTCTGGCAGCCTTGTTTGTAGC  
CATTAAAGA-----TTCTGCCAGAGAGGACAAAGAATTGACTTCTT---  
---GTCTTTTCT-TTTTCTA-----CCCTTCAGATATACGACCTCTCTGTCGATGCCTTG  
AGC

>Pgu

AGGCTCGCAGACAGAAGCTTGCTATAGTTACTGCAGACTTTGTCAAGGTA----CTGTTTC  
C-TTCTCTTGGTGTGGTACAATGACCTTGTGGTGATTGAGAGCTTCTTCTAGCCAATAG  
TGACTTCAGAAAGCTTCTGGGGGGGGGGTGT---GACTTACC---TTGTTGTCT----  
-----AATTCTC---C-----AAGCTGTGAAGGTG---ATGGCTTGATTT-  
GTATGTAAATTGTTTTT-AAATGAGACTGAACTGCTTAAA--GTCCTCAACCTCACTTTT  
AGCCCCAGAGTCC-----AGTGACAAGATA-GAGGTCAAGAAAATAAGCCTTA  
ATGACTTACA-----AGATTTTTGA---TGGCTTATAATGAGAATAAATAGCAATTGTT  
TTCTGTTT---GGGTCGGAAGCTTTGAGTGTCTTCCCTTCCCAGATTAATATTTTT---  
-----GTGATGGTAAATTAGGCTATCCTTTGTCTCAATTTTTTAGTTTTTTGAAA-----  
GAAGGGTATTGCCTTAG---ATCCA-----GATTT-CGTAGCTTA  
TTTTGCCTTTTGCCAAGTATAA-----

-----GAAA-----TTCAA-GTTAA---AAC  
TCATTCTAATCCTTCATTTATTAGTCCTCACTTTGGTCTGGCAACCTTGCTTGTATAGC

TATTAAGA-----TTCTGCCAGAGAGGACCAAGAGTTAACTTCTTATT  
TATAGTCTCTTCTTTTCTA-----CCCTACAGATATATGACCTCTCTGTTGATGCCTTG  
AGC

>Tro

TGGCTCACAGACAGAGTTGGCCATCGTAACTGCAGACTTCGTCAAGGTA----CTTTCTG  
C----TCTTAGTGTTCGGCATAGTGACCTTGTGGTGATTGGGAGCCTCTGCTAGACAGTGG  
TGTGCTTCAGGAAGCTTCTCAGT----GGGGA---GACCCATG-----  
-----TTTTCTT----GAAGAGGACGAATGACATC-----GGT----ATGTCCTGACTT-  
GTCAGCAAATTGTTTTTTAAGTGGAGCAGAGCTGCTCAGA--GTTGTCAGCCTCAC----  
TCCTTCGGAGTC-ATCCAGGTTA--ACTGATAAGAGA-GAAGTGATGATGAAAAGCCTCT  
CTGACTCACT--GTTTAGATTCTGA---TGGCCTACAATGACTGTAAATAGGAGTTGAT  
TTCTGTTT---TCATCAGAAGCTTTCAGGGTCTTCCCTTCCA-----  
-----GGCCATCTTTTGTCTCAGTTCTTAGTTTTTTGAAA-----  
---GGCATTGCTTCAG---ATACATT---AGGAACTAACA----GATTTAAAGGGGTCA  
TTTTGCTTTTGCCAAGCATAA--GAAATACAACCTTAA----GGGGTAGCTAGGTGTCA  
CAGTGAATAGAGCACTGGTCCCTGGAGTCAAGAGGATCCGAGTTCATATTCAGGCTCAGAC  
ACGTAACACTTAACTAGCCGTATGACTCTGGGCAAGTCATTTAACCTCAATTGCCCTGTC  
CTCCCCACTCCAGAAAGCAAAAGAAA--GAAA-----TCCAA-GTTAA--AAC  
TCAATCTAATCCTTTGTATACTGGTTTCCAACCTCAGCTTGGTAGCCTTGGTTGGTTTAGC  
TACTGATGAATCAGGT-GAGG----TTCTGCAAGAGAGGACCAAGAGTTGGCTTCTTGCT  
T--AGCTTTTTTCTCTCTA-----CCTTACAGATATACGACCTCTCTGTTGATGCCTTG  
AGC

>Ppe

TGGCTCACAGACAGAGCTGGCCATCGTTACTGCAGACTTCGTCAAGGTA----TTCTCTA  
C----TCTTAGTGTGGTATAATGACTGTGTGGTGATTGGGATCCTCTGCTAGTCAATGG  
TGTGCTTCAGAAAGCTTCTCAAT---GGGGCT---GACCCATT---GTTGTTGGTCAT  
-TTTTTTTTCTT----GAAGAGATCCATTGACATCATGAAGGTG--ATGGCTTAACTT-  
GTGAGCGAATTGTTTTT-AAGTGAGGCAGAGCTGCTCAGA--GTTGTCCTGCCTCAC----  
TCCTCCAGAGTC-ATCCATGTCT--AGTGACAAGATT-CAAGTCATGATGACAAGCCTCT  
CTGGCTCACT--GTTTAGGTTTTGA---TGGCCTAGAATGAGTGTAAATAGCGATTGTT  
TTCTGTTT---TGATCAGAAGTTTTTCAGGGTTTTCCGTTCCAGATTGATAATTT-----  
-----GTGATGGTAAATTAGGCCACCTTTTGTCTCATTTCTTAGCTTTTTGAAA-----  
---GGCATTGCTTCAG---ATCTATT---AGGAACTAACA----GA-----  
TTTTGCTTTTGCCAAGCATAA-----  
-----  
-----GAAA-----TCTAA-GTTAA--AAC  
TCATTCTAATCCTTTGTTTACTAGTTTTCCAGCTCAGCCTGGCAGCCTTGGTTGGTTTAGC  
CACTAATGAATCAGGT-GAGGTTCTTTCTGCCAAAGAGGACCAAGAGTTGGCTTCTGTT  
T--AGTCCTTTTTCTCTCTA-----CCCTACAGATATATGACCTCTCTGTTGATGCCTTG  
AGC

>Tvu

TGGCTCGCAGACAGAAGCTGGCTATCGTTACTGCAGACTTTGTCAAGGTA----CTGTTTC  
C--TTCTCTTGGTGTGGGTACAATGACCTTGTGGTGGTTGAGAGCTTCTTCTAGCCAATAG  
TGTACTTCAGAAAGCTTCTCAAGGG--GGGGT---GACTTACC-----  
-----TTG---TTGTCTTGATTT-  
GTATGTAAATTGTTTTT-AAATGAGACTGAGCTGCTTAAA--GTCCTCAACCTCACTTTT  
AGCCCCAGGGTCATTTGAAGTCC--AGTGACAAGATA-GAGGTCAAGAAGATAAGCCTTA  
ATGGCTTACA-----AGATTTTGA---TGGCTTATAATGAGAATAAATAGCAATTGTT  
TTCTGTTT---GTGTCAGAACTTTGAGTGTCTTCCCTTCCAGATTAATATTTTT---  
-----GTGTTGGTAAATTAGGCTATCCTTTGTCTCAAGTTTTAGTTTTTTGAAA-----  
GAAGGGTATTGCCTTAG---ATCCA-----GATTTT- GTAGCTCA  
TTTTGCCTTTGCCAAGTCTAA-----

-----  
-----  
-----GAAA-----TCAA-GTTAA---AAC  
TCATTCTAATCCTTCATTTATTAGTCCTCACTTCAGTCTGGCAGCCTTGCTTGTTATAGC  
TATTAAGA-----TTCTGCCAGAGAGGACCAAGAGTTAACTTCTTATT  
TATAGTCTCTTCTTTTTCTA-----CCCTACAGATATACGACCTCCCTGTTGATGCCTTG  
AGC

>Mr0

CAGCTCACAAACAGAACTGGCCATCGTTACTGCAGACTTTGTCAAGGTA----CTCTCTC  
C----TCTTAGTGTTGGTACAATGACTGTGTGGTGATTGGGAGCCTCT-GCAAGCCTCAG  
AGTGCTTCAGAAAGCTTCTCAAT---GGGGGT---GATCCATT---GTTGTT--CATC  
-C-TTTATTCTT---GAAGAGGACCAATTTTCATCATGAAGGTG--ATGACTTGACTT-  
GTGAGTAAATTGTTTTT-AAGTGAGGCAGAAGCTGCTCAA--GTTGTCAGCCTCAC-----  
TGCTCCAGAGTC-ATTGAAGTCC--AGTGGCAAGACA--AGTCAAGATGACAAGCCTTT  
ATGACTCATT--ATTTAGATTTTGA---TGGCCTAAAGTGAGTGTAATAGCAGTTGTT  
TTCTGTTT---TGATGAGAAGCTTTGAGGGTCTTCCCTTCCCAGACTGATATTTTC-----  
-----CTGATGGTAAATTAGGCCATCTTTTGTCCCAGTTCTTAGTTTTTCGAAA-----  
---AGGTGTTGCCTCAG--ATCCATT--AGGGACTAACA---GATTTTCATTGGCTCA  
TTTTGCTTTTGCCAAGCATAA-----  
-----

-----GAAA-----TCAA-GTTAA---AAC  
TCGTTCTAATTTTTTGTCCGCTAGTTTCCAGCTCAGCCTGGCATCTTGGTGGGTGTAGT  
CACTAATGAGTCAGG--GAGG-----ACCAAGAGTTGACTTCTTGTT  
T--AGTCCTTTCTCTCTCTA-----CCCTCCAGATATATGACCTCTCTGTTGATGCCTTG  
AGT

>Ptr

TGGCTCACAGACGGAGCTGGCCATCGTTACTGCAGACTTTGTCAAGGTA----CTCTCTA  
C----TCTTAGTGTTGGCACAATGACTGT--GGTGATTGGGAGCCTCT-GCTAGCCTCAG  
AGTACTTCAGAAAGCTTCTCAAT---GGGGGT---AATCCATT---GTTGTT--CATC  
-C-TTTATTCTT---GAAGAGGACCCATTTTCATCATGAAGGTG--ATGGCTTGACTT-  
GTGAGTGAATTGTTTTT-AAGTGAGGCAGAGCTGCTCAA--GTTGTCAGTCTCAC-----  
TGCTCCAGAGTC-ATTGAAGTCC--AGTGGCAAGACATTAAGTCAAGATGACAAGCCTTT  
ATGACTCATT--ATTGAGATTTTGA---TGGCCTAAAGTGAGTGTAATAGCAGCTGTT  
TTCTGTTT---TGATGAGAAGCTTTGAGGGTCTTCCCTTCCCAGATTGATATTTTC-----  
-----ATGATGGTAAATTAGGCCATCTTTTGTCTCAATTCTTAGTTTTTGA---  
---GGGTGTTGCCTCAG--ATCCATT--AGGGACTAACA---GATTTTCATTGGCTCA  
TTTTGCTTTTGCCAAGCATAA-----  
-----

-----GAAA-----TCAA-GTCAA---AAC  
TCATTCTAATCTTTTGTCTACTAGTTTCCAGTTCCANCCAGCATCCTTGGTGGGTTTGTAGT  
CACTAACGGGTTAGG--GAGG-----ACCAAGAGTTGACTTCTTGTT  
T--AGTCCTTTCTCTCTCTA-----CCCTCCAGATATATGACCTCTCTGTTGATGCCTTG  
AGT

>Vur

TGGCTCACAGACAGAGCTGGCCATCGTTACTGCAGACTTTGTCAAGGTA----CTCTCTC  
T-TTTTCTTAGTGTTGGTACAGTGACCCTGTGGTGTTTGGGACCCTCTGCTAGCCAACAG  
TGTGCTTCAGAAAGCGTCCCAGT---GGGGGT---GACCTATT-GTTGTTGTCAATTTAT  
-CCTTTATTCTC---CAAGAGTACCAGTGACATCATGAAGGTG--ATGGCTTGACTTG  
GCGTGTGAATTGTTTTT-GAGTGAGGCAGAGCTGCTCAA--GTTGTCAGCCTCACTCTC  
TCCTCCAGAGTC-ATCGAAGTCC--AGCGGCAAGACA-TAGGTCAAGATGACAAGCCTCT  
GTGACTCATTG-ATT-AGGTTTTGA---TGGCCTGGAACGAGTGTAATAGTAATGTT

TTCTGTTT---TGATCAGAAGCTTTGAGGGTCTTCCCTTCCAGATTGATATTTTT---  
-----GTGATGGTAAATTAGGCCATCTTTTGTCTCAGTTCTTAGTTTTTAAA-----  
---GGGCGTTGCCTCAG---ATCCATT---AGGGACTAACA---GATTTTCAGTGGCTCA  
TTTTGCTTTTGCCAAGCATGA-----  
-----  
-----GAAA-----TCCAA-GTTAA---AAC  
TCATTCTAATCCTTTGTCTACTAGTCTCCAACCTCAGCCTGGCAGCCTTGGTTGGTTTAGC  
CACTATTGAATCAGGT-GAGG----TTCTTCCAGAGAGGACCAAGAGTTGGCTTCTTGTT  
T--AGTCTTTTCTCTCTG----CCCTACAGATATACGACCTCTCTGTTGATGCCTTG  
AGC



GAAGGAA-----GTA ACTCCAGTGATTCTTGCCAAA-GACAAAGTC  
ATTCCTCTTGTGAAATGAATGGTAATGGGCTTGGGGCTCTTATAGATTTTTGGCACAT  
GAAAGAACAAGATTAAAGGG-AAAGAAAGAGAA-----TATATAGTGA-----CCCTGG  
AAAAGGAGGG--AGGCAGAGATGGAACCTTGCTTTCTCCTCTGGACTCAAGTCCATCTTGC  
CTTTCTCTGACCT-CCAG--GCTTCAACCCCATGTGGGAGGAGACC

>Rra

ACTCGGGTTGTGGATGACAATG--GTGGGCTTCGCTTTCCTTCACTCT-----GTCCTC  
TCT-----GA----GCCCTGCACTTCGAGCTGTA-GGGGAGATTTCCCAA  
GGGAGCAGAGACAATAAA---CCC-TA-CA-TGAGAACTCACAGATGAATTGGGAGA---  
-GGGAGGAGGGTCTGAA-TGGCAT-----  
--TGGTCATGATGAGA ACTGGAGCGATTCTGAAGG-----GCTTCCCTGTGTATTCTT

-----ACTTAAT---CTTAGGGCTTTGG-AAAAGAGAAG  
TGAATGGGGATAATTCCAAT-----GACCCTGGGCAAAGGTGTAGTCA-----TC  
CCTCTTGGTAAATAGATTGACTTTGGTAGGTCCGGTGA CTCTTG-TGGCATCTGACATAT  
GAAAGGATGAGATTAAAGGG-AAAGAAAGGGAAA----TCTCTGGTGG-----CTGG  
AAAAGGGAGGTGAGTCAGAAATGGAACCTGCTTTCTCCTCTGGGCTCAAGTCCCTCAC  
TTTGATCTGACCT-CTAG--GCTTCAACCCAATGTGGGAGGAGACC

>Cfu

ACTCGGGTTGTGGATGACAATG--GTGGGCTTCGCTTCCCTTCACTCT-----GTCCTC  
TCT-----GA----GCCCTGCACTGCGAGCTGTA-GGGGAGATTTCCCAA  
GGGAGCAGAGACAACAAA---CCC-TA-CA-TGAGRACTCACAGATGAATTGGGAGA---  
-GGGAGGAGGGTCTGAA-TAGCAT-----  
--TGGTCATGATGAGA ACCGGAGCGATTCTGAAGG-----GCTTCCCTGTGTATTCTT

-----ACTTAAT---CTTAGGGCTGTGG-AAAAGGGAGG  
TGAATGGGGATAATTCCAAT-----GACCCTGGGCAAAGGTGTAGTCA-----T-  
-----TCCGGTGA CTCTTG-AGTCATCTGACATAT  
GAAAGAATGAGATTAAAGGG-AAAGAAAGGGAAA----TCT--GGTGG-----CTGG  
AAAAGGGAGGTGAGTCAGAAATGGAACCTGCTTTCTCCTCTGGACTCAAGTCCCTCAC  
TTTGATCTGACCT-CTAG--GCTTCAACCCAATGTGGGAGGAGACC

>Dgl

ACCAGGGTGGTGGATGACAACG--GTGAGCATCGCTTCCCTTCACTCTCCATCCTCCTTG  
TGTCATAACGTGAGGGCAA---GCCCTCACTATCTGCTGTA-GGAGAGAATTGCCAA  
AGGAGGAGAGATAA---CCCTCCC-CAACCTTTAGAACTCACCTTTGAATTGGGAGAGAG  
GGGAGGGCTCATGTGAT-AGTGACTCCCACCTGCTTCCC-----TCACCCTCCTTT  
CCTTGA-----TGAGAAT-AGAGGGGAGAATAGGGGGTTCTGGGGGGCATTGATATTCAT  
---GGTCTTA---G-GA---GTGGAGCTGATGACCTTTTA-GGCTCTGCCTC-ATGTG-  
-CCTCAT-CA-----CCCTGGTGTGATGTCATTGGTTTTCTTCGAG  
AACAAAGGATGA-----CTG-----AGGGAGG  
TGAAGATAACCAGAGAGAAAGG---GGTAACTCCAATGGTTCTGGGCAA-GACACAGTT  
ATTCCTCATGCTGGCATGGATTTTGGTGGGCTTAGGGACTCTTACAGACTTTTGGCATGT  
GAAAGAACAAGATTAAAGGGAAAGAA-GGGG--ATAATGAGTGGTG-----ATCTTGG  
AAAAGGGAGGTGAATCAAAGATGAAACCTGTTTTCTCCTCTGGACTCAAGTCCACCTTGC  
TTCTCTCTGGCCT-CCAG--GTTTCAACCCCATGTGGGAGGAGACC

>Pta

ACTCGGGTCTGATGACAATG--GTGGGATTCGCTTCCCTTCGCTCTCTATCATCCTTG  
GGTCCAAATGTGGGGCCAGA---GCCCTACGGCATCTGCTGTA-GAAGAAAATTTCCCAA  
AGGAATAGGGAT-----CCCTCCC-TAACTTTTAGAGCTCATAGTTGGATTGGGAGAGTA  
GTGCT-----AGAC-AATGATAGCCGT-TGCCTCCC---TTTCCCTTCTTTCTTT  
TCTGGTAATGGTGAAGACTAGATGGACTCTGAGGGGCATTT-GCTTCTCTTTGTATTCTT

---AGTCTTA---A-GA----GTGAGTCTGATAATTTTGCCAGTTCTGCCTC-ATTTAC  
ACCCAAATCA-----AGACATTA-----CCATTGGTCTTTTTGAG  
AACAAAGGACAAA---CAACCAC---AGTCTTA-----AAGCTGGGG-AA-----  
-----AAGGG--AGGCGACTCCAGTGATTCTGAGCAAA-GACAAAGTC  
ATTCCTTTTTACTGGGGTGGATTTTGGGGGCTAAGGTG-----GAATTTTGGCAGAT  
GAAAGAACAAGATTAA-GGAGAAAGAAAAAGG--ATAATATATGGTG-----  
-----ATTCAGAGATGAAACCTGATTTCTCCTCTGGGCCTAAGTCCACTGTGC  
CTTTCTCTGGCCT-CCAG--GATTTAACCTATGTGGGAGGAGACC

>Dgo

ACCCGAGTCGTAGATGACAATG--GTGGGAATTGCTTCCCTGCGCTCTCCATCATCCCTG  
GGTCCAA-TGT-----GGA---GCCTTGTAGCATCTGCTGTA-GGACAAAATTCCCAA  
AGGAAGAGA---T---CCCTCCC-TGACCTTTAAAGCTCACAGTTGGATTGGGAGA---  
-----GTAGTGCCAGAC-AATGATAGCCAT-TGCCTCCC-TTTCCAAACCTTCTTCCTTT  
TCTGGTAATGGTGAGAACTAGATGGACTCTGAGGGGCATTT-GCTTCTCTTTATATTTTT  
---AGTCTTA---G-GA----GTGAGTCTGATAACTTTGCCAGTTCTGCCTC-ATTTAC  
ACCCAAATCA-----AGACATCA-----CCATTGATCCTTTTTGAG  
AACAAAGGACAAA---CAACCAC---AGTCTTA-----AAGCTGGGAAAA-----  
-----AAGGG--AGGTGACTCCAGTGATTCTGAGCAAA-AACCAAGTC  
ATTCCTTTTTACTGGGATGGATTTTGGGGGCTAAGGTG-----GAATTTTGGCAGAT  
GAAAGAACAAGATTAA-GGAGAAAGAAAAAGG--ATAATATATGGTGAGTCAGAGGTTTC  
ATCTCTATGGTGAGTCAGAGATGAAACCTGTCTTCTCCTCTGGGACTAAGTCCATTGTGT  
CTTTCTCTGGCCT-CCAG--GATTTAACCTATGTGGGAGGAGACC

>Scr

ACCCGGGTCGTAGATGACAATG--GTGGGAATCGCTTCCCTTCGCTCTCCATCATCCCTG  
GGTCCAAATGTGGGCCCAGA---GCC-TGTAGCATCTGCTGTA-GGAGAAAATTCCCAA  
AGGAATAGAG-CT---CCCTCCC-TGACCTTTAGAGCTCCAGTTGGATTGGG-----  
-----AGAC-AATGATAGCCAT-TGCCTCCC-----TTTCTTCTTCCTTT  
TCTGGTAATGGGAGAACTAGAGGGGCTCTGAGGGGCATTT-GCTTCTCTTTATATTTTT  
---AGTCTTA---G-GA----GTGAGTCTGATAACTTTGCCAGTTCTGCCTC-ATTTAC  
ACCCAAATCA-----AGACATTA-----CCATTGATCCTTTTTGGAG  
AACAAAGGACAAA-----A---AGTCTTA-----AAGCTCTGGG-A-----  
-----AAGGG--AGGTAACCTCCAATGATTTTGAGCAAA-GACAAAGCC  
ACTCCTTTTTACTGGGGTGGATTTTGGGG-CTGAGGGAATCTTACAGAATTTTGATAGGT  
GAAAGGACAAGATTAA-GGAGAAAGAAAAAGG--ATAATGTATGGTGA-----  
-----GTCAGAGATGAAACCTGGTTTCTCCTCTGGGCCTAAGTCCACCATGC  
CTTTCTCTGGCCT-GCAG--GATTTAACCTATGTGGGANGAGACC

>Mfa

ACCCGGGTCGTAGATGACAATG--GTGGGAGTCACTTCCCTTCCCTCTCCATCATCCCTG  
GGTCCAAATGTGGGGCCAGA---GCCCTGTAGCATCTGCTGTA-GGAGAAAATTCCAG  
AGGAACAGAGAT-----CCCTCCC-TAACCTTTAGAGCTCATGGTTGGATTAGGAGAGTG  
GGGGAGGAGTGCAAGAA-AATGATCCCAT-CGCCTCCC---TTTCCCTTCTTCATTT  
TCTGGGAATGGTGAGGACTAGAAGGA-----  
-----CTTA---G-GA----GTGAGTCTGATAACTCTGCACAATTCTGCCCT-ATTTAC  
ACCCAAATCA-----AGACATTA-----CCATTGATCCTTTTTAAG  
AACAAAGGACAAA---CAACAAC---AGTCTTA-----AAGCTGTGGG-G-----  
-----AAGGG--AGATGACTCCGATGATTCTGATCAAA-GACAAAGCC  
AT-CCTTTTTACTGGAGTGGGTTTTTGGAGGGCTCAGGGACTCTCACAGAATTTTGGCAGAT  
GAAAGAACAAGATTAA-GGAGAAAGAAAAAGG--ATCATATATGGTGA-----  
-----GTCAGAGATGAA-CACTTTTCTCCTCTGGGCTAAGTCCACCGTGC  
CTTTCTCCGGCCT-CCAG--GATTTAACCTATGTGGGAGGAGACC

>Bil

ACCCGGGTCGTGGATGACAATG--GTAGGTATTTCTTCCCTTCAT-----ATTGTTCTC  
TATCTAAATGTGGGACTAGA---GCCCTCTACTATCTGCTGTAAGGAGAAAATCTCAA

AGGAGTAGAGACAA---TCCTCCC-TAACCTTTAGACCT-----GGTAGAGCA  
GGGAGGGTTTGCCTGAT-GGTGATACCCACCTGCCTCCC----TCCTTCTTCCCTCCTCT  
TCTGGT----CTTAGAACTAG--GATTTTGAGGGGCATTT-CCTTCCCTTTATATTCTT  
---AGTCTCA---G-GAGTGAGTGAGTTGATAACTTTATACAACCCTGCCTC-ACTTAA  
ACCCAATTCAAATGCAAGACAA-----CCCC-----CTTGTGGTTCCTCTTTGAG  
AACAAAGTATGAA---AAACATC---AATCTTA-----GGGCTGAGG-AAAAGCAAGG  
TGATGATAATCAGAGGCAAGGG--GGATAACTCCAATGATCCTGGAAAAAAGACAAAGCT  
ATTCTTCATATCCGAGTGCATTTTGGATGGTCTAGGGGACTCTTGCAAACCTTTTGGCATAT  
GAAAGAACAAAAGTAAAGGGGAGAAAAAAGGG-AACAATATATGG-GG-----CCCTGG  
GAAAGGGAGGTGAGTCAGAGAAGAAATCGTTTTTCTCCTCTGGGCTCAAGTCCACTTTGT  
CTTTCTCTGACCTTCCAG--GCTTCAACCCCATGTGGGAGGAGAC-

>Pgu

ACCCGGGTCGTGGATGACAACG--GTGGGTATTTCTTCCCTTCAC-----ATTTTCCCTA  
TATCTAAGTGTGGGACCAGA----GTCCTGTACTAGCTGTTGTA-GGAGAAAATCTCTGA  
AGGAGTACAGACAA---CCCTCCC-TAACCTTTAGAACT-----GGTACAGTG  
GGGAGGGGTTGCCTGAT-AGTGATATCCATCTGCCTCCC-----TCTTCCCTCCTTT  
TCTGGTCATGCTTAGA-C-----AAGGGGGAGT-----CTTTATATTCTT  
---AGTCTCA---G-GAGTAAGTGAGTTGATAACTTTATACAACCCTGTCTC-ACTTAA  
ATCCAATTCATATGCAAGTCAAGACAA----CCCC-----CTTGTGGTTCCTCTTTGAG  
AACAAAGTACGAA---CAACAAC---AATCTTA-----GGGCTGAGG-AAAAGTGAGG  
TGATAATAACCAGAGGCAAGGGAGTAGTAACTCCAATGATTCTGGAAAAA-GAGGAAATT  
ATTCCAGATATTTGAGTGGATTTTGGATGGTCTAGGGGACTCTTGACAGACTTTTGGCATAT  
GAAAGAATAAAAAGTAAAGGGGAGAAAAAAGGGG--ACAATATATGGTGG-----CCCTGG  
AAAAGAAAGGTGAGTCAGAGATGAAATCTGTTTTTCTCCTCTGAGCTCAAGTCCACCTTGC  
CTTTCTCTGGCCTTCCAG--GCTTCAACCCCATGTGGGAGGAGAC-

>Iso

ACCCGGNTCGTGGATGACAACG--G-GGGTATTTCTTCCCTTCAC-----ATTTTTCCTA  
TATCTCAGTGTGGGACCAGA----GTCCTGTACTAGCTGTTGTA-GGAGAAAATCTCTGA  
AGGAGTACAGACAA---CCCTCCC-TAACCTTTAGAACT-----GTACAGTG  
GGGAGGGGTTGCCTGATAAGTGATATCCATCTGCCTCCC-----TCTTCCCTCCTTT  
TCTGGTCATGGTTAGA-C-----AAGGGGGAGT-----CTTTATATTCTT  
---AGTCTCA---G-GAGTAAGTGAGTTGATAACTTTATACAACCCTGTCTC-ACTTAA  
ATCCAATTCATATACAAGTCAAGACAA----CCCC-----CTTGTGGTTCCTCTTTGAG  
AACAAAGTACGAA---CAACAAC---AATCTTA-----GGGCTGAGG-GAAAGCGAGG  
TGATAATAACAAGAGGCAAGAG---AGTAACTCCAATGATTCTGGAAAAA-GAGGAAATT  
ATTCCTCATATTTGAGTGGATTTTGGTGGTCT-GGGGACTCTTGACAGACTTTTGGTATAT  
GAAAGAATAAAAATAAAGGGGAGAAAAAAGGGG--ACAATATATGGTGG-----CCCTAG  
AAAAGAAAGGTGAGTCAGAGATGAAATCTGTTTTTCTCCTCT-----GTCCACTTTGC  
CTTTCTCT-----

>Tro

ACCCGGGTTGTGGATGACAATG--GTGGGTATAACTTCCCTTCACTCTCCATCCTCCCTG  
GGTCAAAATGTAGGGTCAGAGAGAGCCCTCTGCTGTCCACTACA-GGA-----  
-GGAGAAAAGACAA--GCCTCCC-TAGCCCTTAGAACTCACAGCTGAGTTGGAAGAGTG  
GGGCGGGCATGCGTGAC-ACTGATGCCACCTGCCTCCCTCCCTCTTTCTCCCTCCTCT  
TCCAGTCCCT-GTGAGAACCAGAGGGACTCTGAGGGGCAT-CCGCTTCCCTTTATATACTT  
---TGTCTCA---G-GA---GTAAGATTAAGGACTTTGCACGCACCTGCCTC-ACTTAA  
ACCCAATTCATGCACAAGACAA-----AAG  
AGCCAAGTACGAA---CAACTCC---GGTCTTA-----AGGCTGTGG-CAGAGGGCTG  
TGATTATAACCGGAGACAAGTG---CCTCACTACAATGGTTCTGGGCAAA-GACAAAGCC  
ATTGCTCGTGCTGGCATCAATTTTAGTGGGCTGGGAAACTT--GCAGAC--TTGGCATAA  
GRAAGAACAAGATTAAGGG-AAATAAAGAGC--ATATTCTATGGGGA-----CCCTGG  
AAAACAGAGTTAAATCAGAAAGGAAACCTGTTTTTCTCCTTTGGGCTTACGTCCACCTTGC  
CTTTCTCTGATGT-CCAG--GCTTCAATCCCATGTGGGAGGAGACC



>Ppe

ACCCGGGTCGTGGATGACAATG--GTGGGCA-----TTCACTCTCCATCCTTCCTG  
TGTCAAAATGTGGGGCCAGA---GCCCTGTGCTGTCTGCTATA-GGAAAGAACTCCCCA  
AGGAGAAGAGACAA--ACCTCCCCCAACCCTTAGAACTCACAGTTGAATTGAGAGAGTG  
AGAAGGGTGTGCATGAC-ACTGATGCCACCTGCCTCCC----TCTCTCTTCCCTCCTTT  
TCTGGTCCTGGCAAGAAC-AGAGTACTACTGAGGGG-ATTCTGTTTCCCTTTATATTCTT  
---AGTCTCA---G-GA----GTAAGGTTGATGACTTTGTGCACATCTGCCTC-ACTTAA  
ACCCAATTCATGCCCAAGTCAAGACAA-----GAG  
AACAAAGGATAAG---CAACCAC---AGTCTTA-----GGGCTGTGG-AAGAAGGAAG  
TGATGATAACCAGAGGCAAGGG---CATAACTCCAATGATTCTGGGCAAA-GACAAAGCC  
ATTCTCTCACTGGAGTGGATTTTGGTGGACTGGGAAATTC-----  
-----AGGG-AAATAAAGGGG--ACAATATATGGGGA-----CCCTGG  
AAAAGGGAGTTTCAGTCAGAGATGAAACCTGTTTTCTCCT-----CAC-TTGC  
CTTTCGCTGACCT-CTAG--GCTTCAACCCCATGTGGGAGGAGACC

>Mr0

ACCAGAGTCGTGGATGACAATG--GTGGGCATAGCTTCCCTTGACTCTCCATCCTTCCTG  
TGTCAAAATGTGTGACCAGA---GCCCTGTGCTGTCTGCTATA-GGAGACAACCTCCCCA  
AAGAT-AGAGACAA---CCCTCCC-TAACCTTTTAGAACTCTTAGTTGAATTGGGAGAGCA  
GGGAGAGAGTGCATGAC-ACTAATGCCTCCCTGCTTCCC----TCTCTCCTTCTTCCTTT  
TCTGGTCCTAGGGAGAACCAGAGGGATTCTGAGGGGCAT-CTGCTTCCCTTTATATTCTT  
---AGTCTCA---G-GA----GTGAAGTTGATGACTTTGTGCATCTCTGCCTCGACTTAA  
ACCCAATTTACGCACGAGTCAAGA--CGTCACCATCGTGATGTCAATGGTCCTCTTCAAG  
AACAAAGGATGAA---TAGCCAC---AGTCTTA-----GGGCTGTGG-AAAAGGGAGG  
TGATGATAACCAGAGGCAAGG-----TAGCTCCAATGATTCTTGACAAA-GACAAAGCC  
ATTCTTGGGCTGGAGTGGATTTTGGTGGACTAGGGAACCTTGCAGAATTTTGGCATAA  
GAAAGAATAAGATTAAGAG-AAATAAAGGGG--ATAAAATATG-TGA-----CCCTGG  
AAAAGGCAGTGAATCACAGATGAAACCTGTTTTCTCCTCTGGGTTCAAGTCCATCTTGC  
CTTCTCTG-GCTTCCAG--GCTTCAACCCCATGTGGGAGGAGACT

>Vur

ACCAGGGTCGTGGATGACAATG--GTGAGCATTGCTTCCCTTCACTCTTACCCTCCCTG  
TGTC AACGTATGGGGCCAGA---ACCCTGTACTGTCTGCTGTA-GGAGAGAACTCCCCA  
AGAAGTAGAGATAA---CCCTCCC-TAACCTTTTAGAACTCACAGTTGAATTAGGAGAGCA  
GGGAGGGCGTGCATGAC-AGTGATGCCACCTGCCTCCC----TCTCTCTTCCCTCCTTT  
TCTGGTCATGGTGAGAATCAGATGGACTCTGAAGGGCAG-TTGCTTCCCTTTACGTTCTT  
---AGTCTCA---G-GA----GTGAGTTGA---CTGTGCACAGCTCTGCCTC-ACTTAA  
ATCCAGTTACGCACAAGTCAAGA-----CCCTCCTGATGTCATTGGTCCTCTTTGAG  
AATGAAGGATGAA-----CCAA---AGTCTTT-----GGGCTGTGG-AAAAGGGAGG  
TGATGGTAACCAGTCACGAGAG-----TAACTCTAATGATTCTGGGCAAA-GACA--GTC  
CTTCCCTCATGCTGGAGTTGATTTTGGTGGGCTAGGGGACTCTTCATTACTTTTGGCATGC  
AAAAGAAGAAGATTAAGTG-AAATAAAGGGA--ATAATATATGGTGA-----CCCTGG  
AAAAGGGAGTTGAGTCAAAA-TGAAACCTGTTTTTCTCCTCTGGGCTCAAGTC-AC-TTGC  
CTT-CTCTG-GCT-CTAG---CTT--ACCC- TGTGG----AGAAC

MARKER 108

>WALLSI1A

-----CTAGGTAAAA-GAGGCCATTCTTTGCCTCATTTCTACCTAGCCTTAATCACTGAATGGGTGTTGCCTCAGTCAAACCTGAGACCTGNGAAA-GACCTTAGCTTAAAAA---GGC  
CAAGGTCTCCC-ATTGCATCCTGGGCCATCTCCAGTCATCCTGATCTATATCTTGCCACTGGACCCAGATGGCTCTGGAG  
GAGAAAGTGAGGCTGGTGACTTTGCACAGCCCTCCCTCACTTAAATCCA-ATTCACTTGCAAGTCATGKCATCACCTCCC  
TGATGTCATGGTCCTCTTTGAGAACAAAAGGACAAA---CAACAA-----

-----  
>WALLSI1A

-----AGAT  
TTCTTTCTTAAGGACCATGCCTTAAACCCAAATCACTCTGGCTCTCATTTGATTGG---CCAACAATAGGTCCCAGCCCA  
AGCCCCACTTGGTCATTGTTTGG--GCCCTGATTGGCTCAGAGTGAATGTAAATAGCAA--TTGTTTCTGTTTTGGCCAG  
AAACCCTGAG---GGTCTTCCCCTCCCAGATTGA-----TTTTTTTTTTTTTTTTTGGACT-AGGTAAAAGAGG  
CCATTCTTTGCCTCATTTCTTACCTAGCCTTAATCAC-TGAATGGGTGTTGCCTCAGTCAA-ACTGAGACCTGNGAAAGA  
CCTTAGCTTAAAAAGGCCAAGGTCTCCCATTCATCCTGGGCCATCTCCAGTCA-----TCCTGATCTATATCTTGCCA  
CTGGACCCAGATGGCTCTGGAGGAGAAAAGTGAGGCTGGTGACTTTGCACAGCCCTCCCTCACTTAAATCCAATTCATTG  
CAAGTCATGKCATCACCTCCCTGATGTCATGGTCCTCTTTGAGAACAAAAGGACAAAACAACAA-----

>Mdo

CTTATTCCCTGACCCTAAAAATGAAAGTAAACAGAAAACCAAACAATCCGCTCCACGCTAAACCCACAGTGGAATGAATC  
ATTCACATT--GTAAG-----

-----TAGAAGCCTCTTCTTATGT-----

-----ATAATG--TACCCTT-CTGTATGTGATCTATTCCTGCCCTTAATGAGGTACTTTTATAACAATTAATA--T  
TATATATTTAGATTATCCTTATGCCTTTCTGCTTGTGGCTCTCTTCT--CAGATTAATGTATAAACAGAATGTCACTGTT  
ATTTTCTCTGTCCCTCT---AGAGAGAAAAACT--ATTTCTGAGAAGTTATGCAGTGAAAAAAAAAATAAAAAAGAAA  
GAAAAGAAGTTATGCAGTGAG-ATTGGGGG-TATCATTGGGACC-ATTTCTCCCTGA-----TTCATGCTGAGATGA  
TGAATATGTGCTTTTTTTT--CCTCTCTTCATTCTTTCTAG--CAAATTAAAACCTACAGACAAAGATAGAAGGTTATCT  
GTCGAGAT

>Dvi

CTTATCCCTGACCCTAAGAATGAAAGTAAACAGAAAACCAAACAATCCGCTCCACGCTAAACCCACAGTGGAATGAATC  
ATTCACATT--GTAAG-----

-----TAGAAGCCTCTTCTTATGT-----













TCATGCCATGGTCCCTTTGAGAATGAAGAACAAATAACAA----CCTGTGACTAATATCAGCTACCCCACTGGTGACCC  
AACTATCCAGTTCA-GTTGAGCAATATAGCTCC--TTCCTTTCCCTTCTTCTCTCCTCCCTTCCCTTCTCCATCTT  
TTTTTTTCCCTCCATACTCCCTCCTTCTTCTCTTCCCTTCTTCCCTGACCAT-----  
-----  
-----  
-----  
-----  
-----  
-----  
-----  
-----  
-----  
-----  
-----ATAGGGAATCATACTCTTGCC----TG  
TAGGTGTTCTGCCCAAAGGAATGTACATTTTGATTGTTGAACTTTATAAGAT----ATCTTGGTATTTATAGGTTAAGA  
TTTCTT-----AAGGACAAACTCAAATACTCTT----TCATTGATTGG----CAAACAGTAGGTCCCAACTCA  
AACCTCACTTGGTCGCTGATA----GTCTGGAT-GGCTCAGAGTAAGCATAAATG-AAG--TTGTTTCTGTTTTGGCATG  
-AACCTGAGGATCTTCT----TTCCAGATTGA-----TTC-TTA-TTTGGACT-AAGTAAANGAGG  
TCATTCTTTGCCTCATTCTTATCTTACCTTAATCA--TGAATGAATGTTACCTCATTCAA-ACTGAGACNTGAG-AAAA  
CTTTAAA-----TGG-----TCTCCCACTATATCCAGGAC  
TCTAGTCATCTGATCTCTTAGGGGAGA-GTAAGGCTGGTAATGTTGCACAGCCCTCCCTCACTTAAATCCAATTCATTG  
TATATCATGACACCACCTCTGTGATAATCATGTTTTCTTCAAGAATGAAGAACAAATAACAAAA-----TCTTT  
TCTTCTCTAATAATGCATGTCCCTCCTGCGTGTGCTCCATTTCTGCTCTTAATGAGCTGCATTTAT--TGCAAATAA-TC  
ATGATATTTAGATTATTTCCCATGCCTTTATGTCTATGATTCTCTTTTT-TAGAGTAATGAATAAACAGAATGTTACAATT  
ATCTTCTTTATTCTCT----AAAGAGAACAATG--AATTCCTGAGAACTAATACAGTGAA-----  
-----GTTGGGG--TGTCAATTGGGACC-AATTTCTCCCTGA-----TTCTTGCTGAGATG-  
--ACCATATGCTTTTTTTT---CCCTCTCATTCTTTCTAG--CAAATFAAACCTACAGATAAAGATAGACG-----  
-----

>Iso

CTTATCCCTGACCCTAAGAATGAAAGTAAACAAAAACCAAACCTATCCGCTCCACCCTAAACCCACAGTGGAATGAGTC  
ATTCACATT--GTAAG--TAGAAA--CCCCTTCTCTTCTTCT--CTAGGT-AAAAGAGACCATTCTTTCCCTCATTTC  
TTACCTATCCATAACCACCAAACAGGCATTGCCCTCAGTCAAGCTGAGACCTGGGGAAAGACCTTAACTTAAAAG----GT  
CAAAGTCTCCC-ACTGCATCCAGGGCTATCTCCAGTCATCTGATTTATATCTTGCCACTGAACCCAGATGGCTCTGGAG  
AAGAGAGTGAGGTTGCTTACTTTGCATAGCCCTACCTCCCTCAAATCTA-ATTAAGTGTACAACATGGCATCACCTTCC  
TCATGCCATGGTCCCTTTGAGAATGAAGAACAAATAA-----CCTGTGACTAATATCAGCTACCCCACTGGTGACCC  
AACTATCCAGTTCCAGCTGAGCAATATGGCTCC--TTCCTTTCCCTTCTTCTCTCCTCCCTTCCCTTCCATCTT  
TTTTTT-CCTTCCATACTCCCTCCTTCTTCTCTTCCCTTCTTCCCTGACCAT-----  
-----  
-----  
-----  
-----  
-----  
-----  
-----  
-----  
-----  
-----  
-----  
-----ATAGGGAATCATACTCTTGCC----TG  
TAGGTGTTCTGCCCAAAGGAATGCACATTTTGATTGTTGAACTTTATAAGAT----ATCTTGGTATTTATAGGTTAAGA  
TTTCTT-----AAGGACGAACCCAAAATACTCTT----TCACTGATTGG----CGAACAGTAGGTCCCAACTCA  
AACCTCACTTGGTCGCTGATG----GTCTGGAT-GGCTCAGAGTAAGCGTAAATGGAAG--TTGTTTCTGTTTTGGCATG  
AAACCCTGAGGATCTTTCT--TTCCAGATTGA-----TTCCTTTA-TTTGGACT-AGGTAAAAGAGG  
TCATTCTTTGCCTCATTCTTATCTTACCTTAATCA--TGAATGAATGTTACCTCATTCAA-ACTGAGACCTGGGAAAA  
CCTTAAA-----TGG-----TCTCCCACTATATCCAGGAC  
TCTAGTCATCTGATCTCTTAGGGGAGA-GCGAAGCTGGTAATGTTGCACAGCCCTCCCTCACTTAAATCCAATTCATTG  
TATATCATGACACCACCTCT--GATAATCATTTTTCTTCAAGAATGAAGAACAAATAACAAAA-----TCTTT  
TCTTCTCTAATAATGTGTGTCCCTCCTGCGTGTGCTCCATTTCTGCTCTTAATGAGCTGCATTTAT--TGCAAATAA---  
-TGATATTTAGATTATTTCCATGCCTTTATGTCTATGATTCTCTTTTT-TAGGGTAATGAATAAACAGAATGTTACAATT  
ATCTTCTTTATTCTCT----AAAGAGAACAATG--AATTCCTGAGAACTAATACAGTGAA-----  
-----GTTGGGGG--TGTCAATTGGGACC-AATTTCTCTCTGA-----TTCTTGCTGAGATG-  
--ACCATATGCTTTTTTTT--CCCCCTCTCATTCTTTCTAG--CAAATFAAACCTACAGATAAAGATAGACG-----  
-----

>Tro

CTTATCCCTGACCCTAAGAATGAAAGTAAACAAAAACCAAACCATCCGCTCCACACTAAACCCACAGTGGAATGAGTC  
ATTCACATT--GTAAG--TAGAAA--CCTCTTCT--CTTCT--CTAGATAAAA-GAAGTTCTTCTTTGCCCTCTTTTT

TTACCTAACCTTACTCACTAAATGG-CATTGCCTCAGTCAAAATGACACCTGGGAAA-GACAATAATTTAAAAG---GGC  
CAAGGTCTCCCTGCTACATCCAGGGATATCTCCATGTGTCTGATCTATCTCTTGCCACTGGACCCAGATGGCTCAGGAA  
CAGAGCGTAAGGCTAGTGACTTCTCAGAGCCCTCCCTCACTTCAATCCA-ATTCATTTTCAAGTCATGGCATCACCTTCT  
TGATGTTATGGCCCTCTTTGAGAATGAAGGACCAA-----  
-----AAAAATCTCT--TCTCATCTTT-----

-----CTAATAATG--TTTCCTTTTCGATATTTGTTCCATTCTCTCTTAATGA-GTGCATTTTT--TGCCAAACCA--  
-TTATATTTAGAAATATCCCTATGCCTTTTTGCTGTGACTCTCTTCT--CAGGTTAATGGATAAATAGGATGTCACTATT  
ATCTTCTCTATCCTCT----AGAAAGAAAACT--ATTTCTGAGAACTTATGCAGTGAA-----  
-----GTTGTAGG-TATCATTGGGATCCTTTTTCTCCTGA-----TTCATTCTGAGATGA  
TGAATGCATGCTTTTTTTT---CCCTCTCATCTTTCTAG--CAAATTAACCTACAGATAAAGATAGACGGTTATCG  
GTTGAGAT

>Ppe

CTTATCCCTGACCCTAAGAATGAAAGTAAACAAAAACCAAACCATCCGCTCCACACTAAACCCACAGTGGAATGAGTC  
ATTCACGTT--GTAAG---TAGAAA--CCTCTTCT-----CTAGGTAAGAAAGGCCCTTCTTGCCTCATTTCT  
TTACCTAACTTAACTCACTGAATGGGCATTGCCCAATCAAATGAGA-----CTTAAAAA---GGC  
CAACGACTCCC-ACTGCATCCTGGGACATCTCCACTTGTCTGACCTATATCTGGCCACTGGACCCAGATAACTCTTGAG  
GAGA--GTGAGGCTAGTGACTTTGCATAGCCCTCCCTCACTTAAATCCA-ATTCATTTGCAAGTCATGGCATCACCTTCT  
TGATATCATGGTCTCTTTGAGAATGAAGGACAAACAACA-----  
-----TAGAAATCTCC--TCTCATCATCT-----

-----TTCATAATG--TGTCTTCTGTATGTCTCTATTCTGCTCTTAATGATGTGTATTTTT---ACAAGCTGTC  
ATGATTTTTAGAAATATCCCTATGCTTTTCTTCTCTGACTCTCTTCT--CAGGTTAATGGATAAACAGAAATGTCACCATT  
ATCTTCTCTATCATCT----AGAAAGAAAACT--ATGTCCTGAGAACTTATGCAGTGAA-----  
-----GTTGTGGG-TATCATTGGGACCTTTTTTCTCCTTGA-----TTCATGCTGAGATAT  
TAAGTGTGTGCTTTTTTCTCTCTCTCTCATCTTTCTAG--CAAATTAACCGACAGATAAAGATAGACGGTTATCT  
GTTGAGAT







CAGAGGTGCACTGTGGATTGGACAGCAGCTGCAG-----ACTAAAGGTGAGGGGGTTTCCAGGCTGAGGAGCAT--GG  
G-AGCCCTCTCAGGCTGTGC-TCGCTCTGCTTCTAG--GCCTGTAAGTTGCCCTGCGCATGTGTGGCCCTAATGTGGAA  
TGTGAAGAGCTAGCAGCCTTTTTTTGAGAAGCAACTGCATGACGGGCGTGGGCTA

>Dgl

AGATCGTCAATGGGCTGGTGAGCCTGTTACTGCACCTGCAGGACCCCAAGCCCCCTGTTGTCAGT--GTGAGTAACAAGG  
GGGAGGGGAGGGG-----GGGGCAGAGGGTGATCTTCTGC----TAGGGAGGGACTAG--TCCCAA  
CTGTCTAC-----

-----GGGGTGT-----ACCAAGCTTCTAA-GTGCC-TGC-TGCCAG  
CCAGTGTGCTTTTTGAATTGGATGGCAGCTATAG-----ACTAAATGGGAGGGGATTAACAGGGTGAAGAACAT--GG  
GGTACCTTCTGAGCCCTTTGCTTGCTCTGCTTCCAG--GCCTGTAAGTTGCCCTTCGCATGTGTGGCCCTAATATGGAA  
TGTGAAGAGCTAGCAGCCTTGTGTTGAGAAGCAGCTGCATGATGGGCGTGGGCTA

>Nty

AGATCATCAGTGGGCTGGTGAGCCTGTTACTGCACCTACAGGACCCCAAGCCCCCTGTTGTCCAT--GTGAGTAACAAGA  
ACAAGGGGACAAGA-----AGTGGGGCATAAAGTAATCTGGGAGGGAGGGAGGGAGGCCTAG--TATCAA  
CTATCAGTGTGGGTGTT-----

-----ACCAGGCTT---GGAGAGGTATG-----AGCTTAC---CTGC---TGCTTCCCAT  
CCAACATGCTTTTTGGATTGGATGACAGCTATAG-----ACTAAATGTGAGGGGATTTCCAGGATGAAGAACAT--GG  
GGCACCCTCTGAGCCCATGC-TTACTCTACTTTCAG--GCCTGTAAGTTGCCCTGCGCATGTGTGGCCCTAATATGGAA  
TGTGAAGAGCTAGCAGCCTTGTGTTGAGAAGCAGCTGCATAATGGGCGTGGGCTA

>Pta

AGATCATCAACGGGCTGGTGAGCCTGTTACTGCATCTGCAGGACCCCAAGCCCCCGTTGTCAGT--GTGAGTAACTGGG  
CAAGGGCCA-----GGGGCCGGACGGGCTGT---TAGGGAGGGA-----

-----GCAGTGCCGGCCG-CCCGGAGG-TGAGGGGAGCGCGG  
GGACCCCTCTGACCCGGCGCGTGTTC-GCTTGCAG--GCCTGTAAGTTGCCCTGCGCATGTGTGGCCCTAATATGGAA  
TGTGAAGAGCTAGCAGCCATGTTTGAAGAAGCAGCTGCATGATGGGCGTGGGCTG

>Dgo

AGATCATCAACGGGCTGGTGAGCCTGTTACTGCATCTGCAGGACCCCAAGCCCCCGTTGTCAGT--GTGAGTAACTGGG  
CAAGGGCTG-----GGGGCCGGACGGGCTGT---TAGGGAGGGAG-----

-----TGGTGCCGGCCGCCCCGGAGG-TGAGGGGAGTGC GG  
GGACCCCTCTGACCCAGCGC--GTTCC-GCTTGCAG--GCCTGTAAAGTTGCCCTGCGCATGTGTGGCCCTAATATGGAA  
TGTGAAGAGCTAGCAGCCATGTTTGAGAAGCAGCTGCATGATGGGCGTGGGCTG

>Scr

AGATCATCAATGGGCTGGTGAGCCTGTTACTGCATCTGCAGGACCCCAAACCCCGTTGTCAGT--GTGAGTAACCAGG  
CAAGGGCCA-----AGGGGCCGGATGGGCCTGC---TAGGGAG-----

-----TGGTGCCGGCCGCCCCGAAGG-CGAGGAGAGCGCAG  
GGACCCCTCTAACCCGGCGTGTGTTTC-ACCTGCAG--GCCTGTAAAGTTGCCCTGCGCATGTGTGGCCCTAATATGGAA  
TGTGAAGAGCTAGCAGCCATGTTTGAGAAGCAGCTGCATGATGGGCGTGGGCTG

>Mfa

AGATCATCAACGGGCTGGTGAGCCTGTTACTGCATCTGCAGGACCCCAAAGCCCGTCGTCAGT--GTGAGTAACCAGG  
CGAGGAACG-----GGAGGCCGGACGGGCCTGCTAGGAAGGGAGCAGTGC-----

-----TGGCCGGCCGCGCCCGCCCCGAGG-TGAGGGGGGCGCGG  
GG-CCCCCTGACCCGACGC--GCTCC-TCTTGCAG--GCCTGTAAAGTTGCCCTGCGCATGTGTGGCCCTAATATGGAA  
TGCGAAGAGCTAGCAGCCATGTTTGAGAAGCAGCTGCATGATGGGCGTGGGCTG

>Bil

AGATCATCAGCGGGCTGGTGAGCCTGTTACTGCACCTGCAGGACCCCAAAGCCCGTGTGTCAGT--GTGAGTAACCAGG  
ATCATGGGACAGTG-----GGAATAGGGTCATCCTTGGGT---TAGGGAGGGACTAG--CACCAA  
CTCTTCACGGGGGTGTG--GCCAGCTG-----

-----AGGAGCAGGGAGCCG  
GTAAGAGCTTTTGG-----ACAACCTGAACTCAAGGGTGAAGAAAAT---G  
GGAGTGCTCTGAGACCATGCTTGCTCT-GCTTCCAG--GCCTGTAAATTTGCCCTACGCATGTGTGGCCCAACATGGAA  
TGTGAAGAGTTGTCCATCTTGTGTTTGAGAAGCAGCTGCATGATGGACGTGGGCTT

>Pgu

AGATCATCAGCGGGCTGGTGAGCCTGTTGCTGCACCTGCAGGACCCCAAAGCCCGTGTGTCAGT--GTGAGTAAC----

-----CAGGGTG  
GGCAGAGGGTCTTCATG-----GCGGGTGATCTGACAG----AGGAGCAGGGACTCAAGGGTGAAGCCCAT---G  
GGAGTG--CTGACCC-GCGCTTGCTC--CCTTCCAG--GCCTGCAAGTTTGCCCTGCGCATGTGTGGCCCCAACATGGAA  
TGTGAAGAGCTGTCCATCTTGTGTTGAGAAGCAGCTGCATGATGGACGTGGGCTA

>Iso

AGATCATCAGCGGGCTGGTGAGCTTGTGCTGCACCTGCAGGACCCCAAGCCCCCTGTTGTCAGT--GTGAGTAACCAGG  
AATGGGG-----

-----CAGGGTG  
GGCAGAGAGTCTCCATG-----GCGGGTGATCTGGCCG----AGGAGCAGGGACTCAAGGGTGAAGCCCAT---G  
GGAGCG--CTGAGCCTGCGCTTGCTC--CCTTCCAG--GCCTGCAAGTTTGCCCTGCGCATGTGTGGCCCCAACATGGAA  
TGTGAAGAGCTGTCCATCCTGTTGAGAAGCAGCTGCATGATGGACGTGGGCTA

>Tro

AGATCATCAATGGGCTGGTGAGCCTGTTACTGCACCTGCAGGACCCCAAGCCCCCTGTTGTCAGT--GTGAGTAACAAGG  
GGAAGGGGAGGGG-----GTGGAGGGGAGTCTTTTTTC----TTAGGAGGAACTCG--CACCAA  
TTATCCCTGGGAGCATG--ACCAGGCT-----GGGCTTTACTGGCTAGACTTCTTTCTCAAAGACCAT  
GCCCTAAATCGTATTCACCTCTGGGTTTCATAGACTGGACAGCATGTAGGTCCTGCCCCAACACCGCTTAATGGTTTTCTT  
TTGGGGGGGGTCC-----AGCTGTTTTCTCTTGTGGCCAGCAACCCTGAAGACTTTTCCCTC  
CCAGTTTAAATTTTTAAATTTTTTA-----TTAAAGGGGACAAACCACA-----

-----CACGAG-----TAAGTCTGGAGAGCCGTGAGCAC--CTCTCCTAGT  
CCAGTTTGTCTTCTGGATTGGA--CAGCAGTTAGTTGTAGACTGAATGTGAGGGGATTTCCAGGTTGAAG-----  
---ACC--CTGAGCCCACGCTTGCTCTTGTGTTCCAG--GCCTGTAAGTTTGCCCTGCGCATGTGTGGCCCCAACATGGCA  
TGTGAAGAGCTGACGACCTTGTGTTGAGAAGCAGCTGCATGATGGGCGCGGGCTA

>Ppe

AGATCATCAATGGGCTAGTGAGCCTGTTACTGCACCTGCAGGACCCCAAGCCCCCTGTTGTCAGT--GTGAGTAACAAAG  
GCAAGCAGATGGGGTGGGGCGGGGGGAGGAGGGGAATAGGGGAATCTTTTTGC----TAGGGAGGGACTAG--TTATTGA  
CTATCCGTGGGAGCGTT--ACCAGGTT-----GGGGTTTACTGGATAGATGTCTTTCTCGAAGACCAT  
GCCTTAAACCTGTTCACTCGGGATCTCATTTGACTGGACAACA-GTAGGGCCCTGCCAAGC-----AGGGTTATTT  
TTTGA-GTCCCTCCTGGCTCAGAGTAAATGTAAATAGTAAC--TTTCTCTTTTGGCCAGCAACCGTGAAGATTTTCCCCTC  
CCAATTTGATTTTGTAATATTTA-----TTCAAGGGGCCATCCCTTG-----ACTCACTTCTTA  
AA--GGCCTT----ACACAAAGTGAGAACTTGAACCTTATC-----TTAAAAGGGCCAAGG--CCCATTGCATCCTGG  
GCCATCTCCAGTGATTCCTGATCTCTGTCTTGCCACTGGACCCAGTGGCTCTGGAAGAGAAAGTAAAGCTGGTGACTTT  
GCATAGCCCTTCCTTACTTAAATCCAATTCACCTGCATGTGCTGGCATCA-----

-----CCATCCTCAT  
CCAACGTGCTTTTTGGATTGGACGGCAGTTAATAAGCA-----AGAGGGGATTTCCAGGGGGAAGAATGT--GG  
GG-ACC--CTCAGCCCATGCTTGCTCT-GCTTCCAG--GCCTGTAAGTTTGCCCTGCGCATGTGTGGCCCTAATATGGAA  
TGTGAAGAGCTAACAGCCTTGTGTTGAGAAGCAGCTACATGATGGGCGTGGGCTA

>Tvu

AGATCATCAATGGGCTGGTGAGCCTGTTACTGCACCTGCAGGACCCCAAGCCTCCCGTTGTCAGT--GTGAGTAACAAAG  
GCAAGGGGATGGG-----AGGGGAGCATAATGTCATCTTTTTGA----TAGGGAGGGACTAG--CACAAA  
CTATCCATGGGGGCATT--ACTAGGCT-----GGGGTTTACTGGCTACATTTCTTTCTCAAAGACCAT  
GCCTTAAACCCAATTCACCTCTGGAGCTCATTTGATTGGACAACA-GTAGATCCCTGCCAGGCACCACTTCATGTTTATTT  
TTTTGG-GCCCTCCTGGCTCAGAGTGAATATAAATAGTAACTGTCTCTCTTTTGGACAGCAACTCTGAGGGTCTTCCTCTC  
CCAGTTTAAATTTTTTTTTT--TA-----TTAAAGGGGCCATCCCTTG-----ACTCACTTCTTA  
AA-GAGGCCCTCCCTCACTCAAAACGAGAACTTGAAGAGACCTTAGC--TTAAATGGGCAAGATCTCCCACTGTTTCTCTGG







CCCAAAGGCCAGCTATA-CCTTCCATAA--GGCCCTACAGCATGGCCAAGCAT-GACAAC  
AGTGAGAATTAAGAGGAGAAGTAAGAAGT-AAAGAAAAA-----CATAA  
GAAAAT--GAGTGTAATTATTACCTAAATTCAGAGCTCAGAGTATGCCTAGTATTTGGA  
AGGACTTCTGGCTTCCTCCCTTCCCTCCCCGACCTTCATTCCCAA---CACACAGATG  
CCTCCAGCTCAC--CCGTGAGTGACCCAACCTCCCGGGAGTTCCTGTCAGTCACACTGATG  
CCGT

>Dvi

ATGGTGATTTCGGGAAATGACCACCTGGGAGATGCCAATGACTGCAGCTTT--CTAAGAGT  
AGGGAGAATAGAGGGAAGGAAGAAG----CCATCAGAAACCCAGATACCAGACCATCCC  
ACACCCATGCAAGAA----TCAAG-AAACAGC-ATAATAGCTCTAACAGAGCCCATTTCGA  
AATGCACAAGGAATAGCTCTGCAAAGAAGACCACAGCC-CA-----

-----  
-----  
-----  
-----  
-----  
-----  
-----  
-----

-----TTCTAACACT-A  
CCCAAAGGCCAGCTATA-CCTTCCATAA--GGTCCTAGGGCATGGCCAAATAT-GACAGC  
AGTGAGAGCTAAATAAATGAAGTCAGAGGT-AAAGAAAAGA-----CAGAA  
GAAAACAAGAGTGTAATTATGACCTAAATTCAGAACTTGGAGAATGCCTAATATTTGGA  
AAGAATTCTGGCTTCCTCCCTTCCCTCCCCTACCTTCATTCCCAA---CACACAGATG  
CCTCCAGCTCAC--CCGTGAGTGACCCAACCTCCCGGGAGTTCCTGTCAGTCACACTGATG  
CCAT

>Mnu

ATGGTGATTTCGGGAAATGACCACCTGGGAGATGCCAATGACTGCAGCTTT--CTAAGAGT  
AGGGAGAATAGAGGGAAGGAAGAAG----CCATCAGAAACCCAGATACCAGACCATCCC  
ACATCCATGCAAGAA----TCAAG-AAACAGC-ATAATAGCTCTAACAGAGCCCATTTCGA  
AATGCACAAGGAATAGCTCTGCAAAGAAGACCACAGCC-CA-----

-----  
-----  
-----  
-----  
-----  
-----  
-----  
-----

-----TTCTAACACT-A  
CCCAAAGGCCAGCTATA-CCTTCCATAA--GGTCCTAGGGCATGGCCAAATAT-GACAGC  
AGTGAGAGCTAAAGAAATGAAGTCAGAGGT-AAAGAAAAGA-----CAGAA  
GAAAACAAGAGTGTAATTATGACCTAAATTCAGAACTTGGAGAATGCCTAATATTTGGA  
AAGAATTCTGGCTTCCTCCCTTCCCTCCCCTACCTTCATTCCCAA---CACACAGATG  
CCTCCAGCTCAC--CCGTGAGTGACCCAACCTCCCGGGAGTTCCTGTCAGTCACACTGATG  
CCGT

>Rra

ATGATGATTTCGGGAAATGACGACCTGGGAGATCCCAATGACTGCAGCTTT--CTGAGAGC  
AGGGAAGATAGAGGGAAGAAGGAAGGAA-TCATCAAAGACCCAGATGCCAGCCCATCCC  
ACACCCATTCAATTAA-GAGTCAAGTACT-AGC-CCAATAACCCTGACAAAGCTAATTCCA  
AAAATGCAGGGGAT-----AAAATTGCTAAAAA-GC-----

-----  
-----  
-----  
-----  
-----

-----  
-----  
-----  
-----ACAGATAAAATATAACACT-A  
CTCCAAGGCCAGCTATA-TCTCCCATAA--GAACCTAT-GGATGT-CAAATAT-GAAAGC  
AGAGAGAGTTAAAGAGGCTAAGTCATAAGCAAAAG-----CCGAA  
GAAAACAAGGCTATAAGTTATTACCCAAATTCAGAGCTCAGTGCATGCCTAAGATGTAGA  
AGGAATTCTGGC---CTCCC-----TCTCCTACCTTCGTACCCAAT---GACACAGATA  
CCTCCAGCTCAC--CCGAGAGCAACCCAGTTCCTGGCAGTTTCGGTCAGTCACACTGATG  
CCGT

>Cfu

ATGATGATTCGGGAAATGACGACCTGGGAGATGCCAATGACTGCAGCTTT--CTGAGAGC  
AGGGAAGATAGAGGGAAGAAGGAAGGGA-CCATCAAAGACCCCAGATGCCAGCCCATTCC  
ACACCCATTATTAA-GAGTCAAGTACT-AGC-CCAATAACCCTGACAAT-----  
-----AAAATTGCTAAAAAA-CC-----  
-----  
-----  
-----  
-----  
-----

-----ACAGATAAAATATAACACC-A  
CCCCAAGGCCAGCTATA-CCCCCATAA--GAACCGAT-GGATGT-CAAATAT-AAAAGC  
TGAGAGAGTTAAAGAGGCTAAGTCATAAGCAAAAG-----CCAAA  
GAAAACAAGGCTATAAGTTATTACCCAAATTCAGAGCTCAGTGCATGCCTAAGATGTAGA  
AGGAATTCTGGC---CTCCC-----TCTCCTACCTTCATCCCCAAT---GACACAGATA  
CCTCCAGCTCAC--CCGAGAGCAACCCAGTTCCTGGCAGTTTCGGTCAGTCACACTGATG  
CCGT

>Dg1

ATGGTGATTCGGGAAATGACCACCTGCGAGATGCCAATGACTGCAGCTTT--CTGAGATT  
--GAAGAATAGAGGGAAGGAAGGAATGAACCATCAGAGACCCTAGATCCCAGCCCATTCC  
ACATACATGCAGGGA---TCAAGC-ACCAGC-ACAATAGCCCTGACAGAGCCAATTTGA  
AATG-----CCTTGCTAGAAGACCACAGCTACA--TCTTTGTTGTTCTTCA  
TTCAA-TCA---TTTTTTCAGTC--ATGTTCAATTCTT-----  
-----  
-----

-----TGTGACC  
CCATTTGGGATTTTCTTGGCAAAGACACTGGAGTGCTTTGCCATTTTCTTTTCCAGCTCA  
TTTCATAGATGAGGAAACCGAAGCAAACAAGGTTAAGTGACTTGCCCAGGGTCACACA-A  
CTAATAAGTGCCTG-GAGCTGGATTTGAACTTGAGAAGAT--GAGTCTTCTGACTCCAG  
GCCTAACATTCTATCTACTTCACCACCTAGCTGCC---ACAGCCAAATCTAACACT-A  
ACCAAAGCCCAGCTATA--GCCCCAGAAGAGACCCTAT-GGATGGCCAAGCAT-GAGAGC  
AGAAAGAATTAAAGAGGCTAAATCATAAGC-AAAGAAAAAACAGAAGAGAAGC--AGAA  
GA-AAAGAGGGTGTAAATTATTACCCAAATTCAGGGTTCAGTGCATGCCTATGATGTGGA  
AGGAATTCCAGCTACCTCCC-TCCTCG---ACCTTCTCCCCAAA---CACAAAGATG  
CCCCCAGCTCAC--CCGTGATCGACCCAACCTCCTGAGAGTTCCTGTGAGTCACATTGATG  
CCAT

>Pta

ATGGTAATTCGGGAAATGACCACCTGGGAGATGCCAATGGCTGCAGCTTT--CT-----A  
AAAAAGAATAGAGGGAAGT-----AGTTGTCAGAGATCCTAGATCATTGCCATTCC  
ACATACACACATGGC---TCAAGA-ACCAGT-TCAGTAGCCCTGAGAT-----  
ATATATGTGTGGGATACTTTTACCAAAGACCACCTCTACA---TATTTGTGC-TGGTTG

TTCAAGTCA-----GATCCAATTCTT-----  
-----  
-----GGTGACC  
CTGTTTGGGGTTTTATTGGTAAAGATATTTTAGTAATCTGCCATTTTCTTCTCCAGCTCA  
CTTTACAGATGAAGAA-CTGAGGCAAACAACATTAAGCAACCTGCCCAAGATCACACA-G  
CTAGTCAGTGTCTAAGACCAGACTTGAAACTCAGGAAGAT--GAGTCTTCTGACTCCAC  
ATTTGACATTCTATAT-----ACTGCC-----CCAGCTAAATCTAATACT-A  
CCCAAAGGCCAGCTATA-CCCCCATAAAAGACCTTAT-CAATGGCCAAGCAT-GAGAGG  
AGAGAG-TTTAAATGGGGTAAGTCATAAGC-AAAGAAAAAACAGAAGAAAAGAAAAGCA  
GA-AAATGGGGTATAAATTATTTCCCAAATTCAGAATCAGCATATGCCCAGGACGTGGA  
AGGAATTCCAACCTCTTCCC-TCCCTCC---CAATTCATTTCAAAC---CATACAGATG  
CTTCCAGCTCAC--CCGTGATCGACCCAACCTCTGAGAATTCCTGTGAGTCACAGTGATG  
CCAT  
>Dgo  
ATGGTAATTCGGGAAATGACCACCTGGGAGATGCCAATGGCTGCAGCTTT--CT----AA  
AAAAAGAATAGAGGGGAGA-----AGTTGTCAGAGATCCTAGATCATTGCCATTCC  
ACATACACACATAGA---TCAAGT-ACCAGT-CCAATAGCCCTGA-----  
-----TATATGGGATAGTTTTTCTAAAAGATCACCTCTATG---TATTTGTGG-TGGTTG  
TTCAAATCAATCTTTTTTCAGTC---ACATGAAACTCTT-----  
-----  
-----GGTGACC  
CTGTTTGGGGTTTTATTGCCAAAGATATTTTAGTAGTTTGCCATTTTCTTCCCTAGCTCA  
CTTTACAGATGAAGAA-TTGAGGCAAACAACATTAAGCAACCTGCCCAAGGTCACACA-G  
CTAGTAAGTGTCTAAGACCAGACTTGAAACTTAGGAAGAT--GAGTCTTCTGACTCCAC  
AGCTGACATTCTATCT-----ACTGCC-----ACAACCTAAATCTAATACTA-  
CCCAAAGGCCAGCTATA--CCCCCATAAAAGACCTTAT-GGATGGCCAAGCAG-GAGAGG  
AGAGAG-TTTAAATGGGTAAAGTCATAAGC-AAAGAAAAAACAGAAGAAAAGAGAAGCA  
GA-AAATGGGGTATAAATTATTTCCCAAATTCAGAATCAGGATATGCCCAGGATGTGGA  
AGGAATTCCAACCTCTTCCC-TCCCTCC---CAATTCATCTCAAAC---CATACAGATG  
CTTCCAGCTCAC--CCGTGATCGACCCAACCTCTGAGAATTCCTGTGAGTCACAGTGATG  
CCAT  
>Scr  
ATGGTAATTCGGGAAATGATCACCTGGGAGATGCCAATGGCTGCAGCTTT--CT----A  
AAAAAGAATAGAGGGGAGG-----AGTTGTCAGAGATCCTGGATCATTGCCATTCC  
ACATACACACATGGA---TCATAC-----  
-----AGGGGATAGTTTTACTAAAAGACCACCTCTACA---TATTTGTGG-TGGTTG  
TTCAAGTCAACC-TTTTTTCAGTC---ACATACAACCTCCT-----  
-----  
-----GGTGACC  
CTGTTTGGGGTTTCATTGGCAAAGATATTTTAGAAGCTTGCCATTTTCTTCTC-----TCA  
TTTTACAGATGAAGAA-CTGAGGCAAACAACATTAAGCAACCTGCCCAAGCAACCTTGGG  
CTAGTAAGTGTCTCAGACCAGACTTAAACTCAGGAAGAT--GAATCTTCTGACTCCAC  
ATCTAACATTCTATCT-----ACTGCC-----ACAGCTAAATCTAATATTA-  
CCCAATGGCCAGCTATA--CCCCCATAAAAGACCTTAT-GGATGGTAAACTCTGAAAGG  
AGATAG-TTTAAATGGGTAAAGTCATAAGC-AAAGAAAAAACAGAAGAAAAGAAAAGCA  
GC-AAATGGGGTATAAATTATTTCCCAAATTCAGAATCAGCACATGCCCAGGATGTGGA  
AGGAATTCCAACCTCTTCCC-TCCCTCC---CAATTCATCTCAAAC---CATACAGATG  
CTTCCAGCTCAC--CTGTGATCGACCCAACCTCTGAGAATTCCTGTGAGTCACAGTGATG  
CCAT  
>Mfa

ATGGTAATTCGGGATATGACCACCTGGGAGATGCCAATGGCTGCAGCTTT--CT-----G  
AAAAAGAAAAAAGGGGAGG-----AGTTGTCAGAGATCCTAGATCATTGCCATTCC  
ACATACACATATGGA---TCAAG--ACCAAC-CCAATAGCCCTGAC-----  
-ATA-TATAGGGGATAGTTTTACTAAAAGACCACCTCCAC---ATTTTGTGG-TGGTGG  
TTCAAGTCAATCATTTTTTCAGTC---ATATCCAACCTTT-----  
-----

-----GGTCACC  
CTGTTTGGGGTCTTATTGGCAAAGATATTTTAGTAGTTTGCCATTTTCTTCTCTAGCTCA  
TTTTACAGATGAAGAA-TTGAGGCAAACAAGATTAAGTGACCTGCCTAAGGTCACACA-G  
CTGGTAAGTGTCTAAGGCCAGACTTGAAACTCAGGAAGAT--GAGTCTTCTGACTCCAC  
ATCTGACATTCTATCT-----ACTTCCC---ACAACATAAATCTAACACTA-  
CCCAAAGGCCAACTATAC-ACCCATAAAAAGGCCCTAG-GGATGACCACCCAT-GAGAGG  
AGAGAG-TTTAAACGGGTAAAGTCATAAGC-AAAGAAAAAACAGAAGAAAAGAGAAGCA  
GG-AAATAGGATATAAATTATTTCCCAAATTCAGAATCAGCACATGCCCAAGATGTGGA  
AGAATTCCAACCTTCTTCCC-TTCTTCC---CAATTCATCTCAAAC---CATACAGATG  
CTTCCAGCTCAC--CCGTGATCGACCCAACCTCCGAGAATTCCTGTGAGTCACAGTGATG  
CCAT

>Bil

ATGATGATTCGGGAAATGATCACCTGGCAGATGCCAATGACTGCAGCTTT--CTGAGAGC  
AGGAAGAATAACGGGAAAGAA-----CCATCAGAGACCCTAGATTCCAACCTATTCC  
ACATGCATGCAGTGA---GCAGGC-ACCAGC-ACAATAGCCCTTTA--GACCAATTCAA  
AATATGCA-GGAGAAAG-TTTACCAGAAGACCACAGCTACA---TCTTTATCGTT-----  
--CAAGTTAGTTGTTTTTCAGTC---AAATCGGACTCTT-----  
-----

-----GGTGATT  
CCACTTAGAA-TTTCTTCCACAAAGTAATGGGAGTACTTTGCCATATTCTCCTCTAGCTTG  
ATTTACAGATGAGGAAACTGAGGCAAAC-AGGTAAAGTGATTTGCCAGGGC-----  
-----TTCTTGACTCCAG  
GGC-AAACTACTACATCTACCAACACCTACCTGCCC---ACAGCTAAATCTAATACT-A  
CCCAAAGGCTAGCTATTACNCCCATAAGAGACCCTAT-GGATAGCCAAGCAT-GAGAGC  
AAAGTGTATTAGAGAGGCTAACTCATAAGC-AAAGAAAAA-----GCAGAA  
GGAAA-GGAGGTATAAATTATTACCCAAATTCAGGGATCAGGGCA-----CATGGA  
AGGCATTTTGGCTTCTTCCC-CCACC-----ACCTTCATCCCCAAACACACAGACAGATG  
CCTCCAACCTCAC--CCGTGATTGACCCAACCTCCTGACAGTTCTTGTGAGTCACACTGATG  
CCAT

>Pgu

ATGATGATTCGGGAAATGATCACCTGGCAGATGCCAATGACTGCAGCTTT--CTGAGAAT  
AGGAAGAATAAAAGTTAAGAA-----CCATCAGAGATCCTAGATTCTAGCCCATTCC  
ACATGCATACAGGCAGGGAGCAAGCAACCAGC-ACAATAGTCCTGATA-AACCAATTCAA  
AATATGTA-GGAGATAGCTTTACCAGAAGACCACAGCTACA---TCTTTATTGTT-----  
--CAACTTAGTTGTTTTTCAGTC---AGGTCTGACTCTT-----  
-----

-----GGTGATT  
CCACTTGGA-TTTCTTCCACAAAGTAATGGGAGTGCTTTGTCATATTCTCCTCTAGCTTA  
TTTTACAGATGAGGAAACTGAGGCAAAC-AGGTAAAGTGATTTGCCAGGGCTCTTAA-G  
AT-----GAGTCTTCTTGACTCCA-  
-----

-----AAGGCTAGCTATTTGCCCCATAAAAGACCCTAT-GGATAGCCAAGCAT-GGGAGC  
AAAGAGTGTTAGAGAGGCTAACTCATAAAC-AAAGAAAAA-----GAA  
GGAAAAAAGGGTATAAATTATAATCCAAATTCAGGGATCAGGGTA-----TGTGGA

AGGACTTTTTGGCTTCCTCCC-TCCCCC--ACCTTCATCCCCAAA---CACATAGATG  
CCTCCAACCTCAC--CCGTGACCGCCCCAACTCCTGACAGTTCTTGTGAGTCACACTGATG  
CCAT

>Iso

ATGATGATTTCGGGAAATGATCACCTGGCAGATGCCAACGACTGCAGCTTT--CTGAGAAC  
AGGAAGAATAAAGGTTAAAAA-----CCATCAGAGATCCTAGATTCTAGCCCATTCC  
ACATGCATACAGGGA---GCAAGCAACCAGC-ACAATAGCCCTGATA-AACCAATTCAA  
AATATGTA---GGAGAGCTTTACCAGAAGACCCGCAGCTAAA---TCTTTATTGTT-----  
--CAACTTAGTTGTTTTTTCAGTC---AGGTCTGACTCTT-----

-----GGTGATT  
CCTTGGAA-TTTCTTCACAAAGTAATGGGAGTGCTTTGCCATATTCTCCTCTAGCTTG  
TTTTACAGATGAGGAACTGAGGCAAAC-AGGTTAAGTGATTTGCCAGGGCTCTTAA-G  
AT-----GAGTCTTCTTGACTCCA-

----AAGGCTAGCTATTTGCCCCATAAAAGACCCTAT-GGATAGCCAAGCAT-GGGAGC  
AAAGAGTGTTAGAGAGGCTAACTCATGAAC-AAAGAAAAAATCA-----GAA  
AGAAAAAGGGTATAAATTATAACCCAAATCCAGGGATCAGGGCA-----TGTGGA  
AGGACTTTTTGGCTTCCTCCC-TCCCCC--ACCTTCATCCCCAAA---CACATAGATG  
CCTCCAACCTCAC--CCGTGACCGACCCAACTCCTGACAGTTCTTGTGAGTCACACTGATG  
CCAT

>Tro

AAGACGATTCTGGAAATGACCACCTGGGATATGCCAGTGACTGCAGCTTT--CTGAGAAC  
AGGAAGAAGAGAGAAAAGG-----AACCATCAGAGAGCTTAGATCCCAGTCCATTCC  
ACATACATGCAGGGA---GCAAGC-ACCAGCCAACTGCCCTGACAGAACCAATCTGA  
AATG-TGCAGAGGACCGTTTTA-GAGAAGACCAAAGCTACA---TCTCTGTTGTTGGTCA  
GTCACA-----GCTTAATC---ACGTCCAACCTCTC-----

-----GGTGACT  
CCAGCTGGTATTTGTTAGAAAAAGATACTGGAAAGGTTTGCCTTTTCTTCTCCATCTCA  
TTTTACAGAAGAAGAACTGAGGCAAACAGGATGAAGTGACTTGCCAGGGTCATACA-G  
CTAGCAAGTGTCCAAGGCCAGATTTG-AACTCAGGAAAAT--GACTCCTCTTGAG-TCAG  
GCCTGACATTCCATCTACTGTACCACCTAGCTGCC---ACAGCTAAATCTAATACTA-  
CCCAAAGGCCAGCTATAT-CCCCATAAAAGGTCCTAT-TGATGGCCAAGCAC-GAAAGC  
AGAAAGAATTAAAGAGAATAAATCATAAGC-AAAGGAAAAAGT-----CGA  
AGAAA--GGTATAAATTCTTACCCAAATTCAGGGATCAACACCTGCCTAAAATGAGAA  
AGGAATTCTGGCTTCTCCCC-TCCCCC---AC-TTCATTCCC-AA---CACACAAGTG  
CCTCCAGCTCAC--CCGTGATCGGCCAACTCCTGAGAGTTCTTGTGAGTCACACTGATG  
CCAT

>Ppe

ATGGTGATTTCGGGAAATGACCACCTGGGAGATGCCAATGACTGCAGCTTT--CTGAGACC  
AGGAAGAATAGAGAGAAGG-----AACCATTAGAGT-----CCATTCC  
ACACACATGCAGGGA---TCAAGC-ACCAGC-ACAATAGCCCTGAC----AGATCCAA  
TCTGAAACT-TGCAGAGGATAGCTTTACTAGAAGACCACAG-TTACATCTTTGTTGCTGT  
T-CAG-TCAGGCATATTTTAATC---ATATCCAACCTCTT-----TTTTTGTGTTGTTGCTG  
TTTTTGTGGGGGGGAGGTAGGGCAATTGGGGTTAAGTGATTTGCCAAGGTTACACAGCT  
AGTTTTGTGTTAAGTGTCTGAGGCTGCATTTGAACTCAGGTCCTCCTGACTCCAGGGCTG  
GTGCTCTATTCACTGCACCACCTAGCTGCC---ATGTCCAACCTCTT--GATGAGT  
CTATTTGGGATTTTCTTGGCAAATGTATTGGAGTGGTTTGCCATTTCTTCTCTAGCTCA  
TTTTACAAAAGAGGAACTGAGGCAAACAGGGTGAAGTGACTTG-----TCACACA-G  
CTAGCAAGCATCCAAGGTCAGATCTG-AACTCAGGGAAAC--GAATTTCTTGAGTTCAG

GCCTGACATTCTATCTACTGCACCTCCTACCTGACC----ACAGCTAAATCTAACACT--  
CCCAAAAAACAGCTATAACCCCTCCATAAAAGGTCCTAT-GGATGGCCAAGCAT-GAGAGC  
AGAAAGAATTAAAGAGGATAAGTCATAAGC-AAAGAAAAAAGT-----CAA  
AGACAAGAGGGTATAAATTATTAACCAAATTTAGGGATCAGCACATGCCTAGAATGTGAA  
AGGAAGTCTGGCTTCTCCCC-TCTCCC----ACCTTCATCCCC-AA----CACACAAATG  
CCTCCAGCTCAC--CCGTGATCGACCCAACTCCTGAGAGTTCCTGTCTAGTCACACTGATG  
CCAT

>Mr0

ATGGTGATTTCGGGAAATGACCACCTGGGAGATGCCGATGACTGCAGCTTT--CTGAGAGC  
AGGAAGAATGGAGAGGA-----CCCATCAGAGAACCTAGATCCCAGCCCATTCC  
ACGCACATGCAGGGG---TCAGAC-ACCAGC-ACAA-----TGACACA-----  
-----TGCAGAGGACAGCTCTCCTGGAAGGCCACAGCCACA---TCTTTGCTGTTGGTGT  
TGCTGCTTAGTCGTTTTTTCAGTC---GTGTCCATCTCTT-----  
-----  
-----

-----GGTGACT  
CCATTTGAGGTTTTCTTGGCGAAGATACTAAAGGGCTTTGCCT-TTTCCTCTCCAGTTCA  
TTTTACAGAAAAGGAACTGAGGCAAACAGGGTGCAGTAACTTGCCCAGGGTCACCCA-G  
CTAGTAAGTGTCTGAAGCCATATTTA-AACTCAGGAAAAT--GAGTTGTCTTGAGGCCAG  
GCCTGACATTCCATCTACTGTACCACCTAACTGCC---TTAGTTAAATCTAACTATGG  
CCCAAAGGCCAGCTATAC-TCCCCATTAAAGGCCCTAT-GGATGACCAAGCAT-GAGAGC  
AGAAAGAATTAAAGAGGGTAAATCATAAGC-AAAGAAAATAGC-----AGA  
AGA-----GAGTATAAGTTATCACCCCAATTC AAGGATCAGCACTTGCCATAAATATGAA  
AGAATTCTGACTTCCCTCCC-TCCCC----CTCTTCATCCCC-AA----CACACAGATG  
CCTCCAGCTCAC--CCGTGATCGACCCAGCTCCTGAGAATTCCTGTCAGTCACGCTGATG  
CCAT

>Ptr

ATGGTGATTTCGGGAAATGACCACCTGGGAGATGCCGATGACTGCAGCTTT--CTGAGAGA  
AGGAAGAGTGGAGAGAAGG-----ATCCATCAGAGATCCTAGATCCCAGCCCCTCC  
ACACACATGCAGGGA---TCAGAC-ACCAGC-ACAA-----TGACATA-----  
-----TGCA-GGGACAGCTTTA-TGGAAGGCCACAG-----CCTTCCTTGCTGCTG-  
-----GTC---ATGTCCATCTCTT-----  
-----  
-----

-----GGTGACT  
CCATTTGAGGTTTTCTTGGTGAAGATACTAACGTGCTTTGCCA-TTTCCTCTCCAGTTCA  
TTTTACAGGAAAGGAACTGAGGCAAACAGGATGCAGTAACTTGCCCAGGGTCACCCA-G  
CTAATAAGTGTCTGAAGCCATATTTA-AACTCAGGAAAAT--GAGATGTCTTGAGTCCAG  
GCCTGACATTCCATCTACTGTACCACCTAACTGCC---TTAGTTAAATCTAACTGTGG  
CCCAAAGGCCAGCTATAC-CCCCATTAAAGGCCCTAT-GGATGACCAAGCAT-GAGAGC  
AGAAAGAATTAAAGAGAGTAAATCATAAGC-----CCGA  
AGA-----GAGTATAAATTATTACCCCAATTC AAGGATCAGCACATGCCTAGAATATGAA  
AGAATTCTGGCTTCCCTCCC-TCCCC----ACCTTCATCCCC-AA----CACATAGATG  
CCTCCAGCTCAC--CCGTGATCGACCCAGCTCCTGAGAATTCCTATCAGTCACACTGATG  
CCAT

>Vur

ATGGTGATTTCGGGAAATGACCACCTGGGAGATGCCAATGACTGCAGCTTT--CTGAGAGC  
AGGGAGAAGAGAGGGGAG-----AACCATCAGAGACCNTAGATCCCAGCCCCTCC  
ACACATGTGAAGGGA---TCAAGC-ACCAGC-ACAACAGCCCTGAGAGAGCCAATCTGA  
AATG-TGCAGGGCATAGCTTTACTAGAAGACCACAGCTACA---TCTTCA---TTGGTGT  
--TCTGTCA-----GTC---ACGTCCAACCTGTT-----  
-----  
-----



-----GGTGACT  
GCATGTGGGGTTTTCTTGGCAAAGATACAGAAGTGGTTTGCCA---TCTTCTCCAGCTCA  
TTTTACAGATGAGGAACTGAAGCAAACAGGGTGAAGTGACTTACCCAGGGCCACACA-G  
CTATTAAGTATCTGAGGCCAGATTTG-AACTCAGGAAAAT--CAGTCTTCTTGAGTCCAG  
GCCTGACATTTTATCTACTGTACCACCTAGCTGCCC---ACAGCTAAATCTAACTCTA-  
CCCAAAGGCCAGCCATAA-CCCGCATAAAAGGCCCTAT-GGATGGCCAAGCAT-GAAAGC  
AGAATGACTTAAAGAGGCTAAGTCATAAGC-AAAGAAAAA-----GCAGA  
AGAAAAAGGGTATAAATTA-CAC----ATTCAGTGATCAGCACATGCCTAGAATGTGGA  
AGGAATTCTGGCTTCCTCCA-TCCCC-----CTTCATCCCCAAA----CACACAGATG  
CCTCCAGCTTAC--CCGTGATCGACCCAGCTCCTGAGAGTTCCTGTGTCAGTCACGCTGATG  
CCAT

MARKER 126

>Mar1b\_Mdo

-----  
-----  
-----  
-----A  
TGGCAAACCA-----CTCCAGT-----  
-----  
-----  
-----ATCTTTGCCAAGAAAACCCCAAATGGGGTC  
ACGAAGAGTCAGACATGACTGAAAACGACTGAACAACAACAACA-----  
-----  
-----  
-----

>WSINE1

-----  
-----  
-----  
-----  
-----TTTTTTTTTTTTTTT  
AGGCAATTGGGGTTAAGTGACTTGCCCAGGGTCACACAGCTAGT-----AAGTGTCTG  
AGGCTGGATTTGAACTCAGGTCCTCCTGACTCCAGGGCTGGTGCTCTATCCACTGCACCA  
CCTAGCTGCCCTC-----  
-----  
-----  
-----

>Mdo

TGACCTCCAGCTGAACTGCTGCAGCCACTCACAGGTCATGCCTCCTGCCAAGGTGCCAG  
GTGC--CTGAGGGGG-----AAAAAACTTGGGAGAAGCAGTTAAGCCAGACAACA--  
--GCTTCACT-----CTCCAACCTTGACACCTATATTGCTGT  
CAAAAT-----  
-----  
-----  
-----  
-----TATGTGTGT  
GTATGATTGT-AGGGG-AAGTCA--TCTATC-AGTCT-TG--GATGATGGCTACAGGCC  
TAGAAACACCTTGATTAGACAGGGCA-CCAGAGG-TTCCAAGCCTACAC-AAATGTCTC  
TTCAGCATTTTCAG-GGACCAGGGTGAAAATGTCCTTCATTGTACAAGGAGAACAAAAGGA  
AGAAGGCTGCCTCAATAGGTGCAGAGGGAACACAAGAGAACTTCCTGCTT

>Cfu

TGTCCTCCAGCTGAACTGCTGCAGCCACTCACAAGTCATGCCTCCTGCCAGGGTACCTAG  
AGAC--CTGAGAAG-----AAAAACTGGGAGAAGCAGTTAAGCCAAACAACA--  
--TCCCCCCCCACCCA-----CTCCAACCTTGACACCTATAATGCTAT  
CAAAAT--CATCT-----  
-----  
-----  
-----

-----GTGTATATGTAT  
GTTTGCTTGT-AGAGTGAGGTCA--TCTATC-----AGTCTTGATAAT-----  
-----TTTTATGAGATTATATACAAGAGG-TCCCAAGCCTACAT--AATGTCTC  
T--AGCACTTCAG-GGGCTAAGGTAGAAATGCCA-TTCTTGTACAAGGAGAACAAAAGAA  
GGAAGA-TGCCTCAACAGGAGCAAAGGGAACAGAAGAGAAATTTCCCATTT

>Dgl

AGCCCTCCAGCTGAACTGCTGCAGCCATTCACAGGTCATGCCTCCTGCCAGGGTGCCCAA  
AGAC--CTGAGGG-----GAAAAAAAAATTTGGGAGAAGCAATTAAGCCAGATAACA-  
--GCCACCCCCCTA-----CCCCCAGCTTGATACTGTAAATGCTGT  
CAAAAT---TGTGCATCACACAC-----ATATCTATATCTATATC  
TATCTATCTATC-----TATGTCCAGT--ATTTTTTGGTTGTTTTTTGTTTTTTGTG  
GGGCAATGGGGGTTAAGTGACTTGCCAGGGTCCACACAGCTAGTAAGTGTCAAGTGTCTG  
AGGCTGGATTTGAACTCAGGTAATCCAGGGCTGGTGTCTTTATCCACTGCGCCA  
CCTAGCTGCCCC---TATGTCCAGT--GTTTTTGCCAAGAAAAGACCAAATAGGGTT  
GTGAAGAGTTGGAGATGACTA-AAACAATGAAC-----AATAT--AAATGTATGTGT  
GTATTTTTGT-AGGGAGCTGTCA--TCTATC-AACCTTAAGTGGTCTTGTCTAGAAACCC  
TAGAAACCTC-TTGACCAGGCCAGACATGAGAGA-TCCCAAGCCTCTACAAAATGTCTC  
TTTAGCACTGCAG-GGTCCAGGGTGA-----AGAACAAACGGA  
GGAAGGCTGCCTCAACGGGGCAGAGGGAACAGAAGAGGCGCTTCTTGTTT

>Nty

TGTCCTCCAGCTGAACTGCTGCAACCACTCACAAGTCATGCCTCCTGCCAGGGTGCCAG  
GGAC--CTGAAGG-----AAAAAATTTGGGAGAAGCAATTAAGCCAGACAACA-  
--ACCTATGACGTTCCCCAAA-----CCCATATTGACACCTATAATGCTGT  
GAATAT---TGTATGTATGTTTA-----  
-----AATTAT-----GAT---TAGT-----

-----ATCTTTGCCAAGAAAATCTCAATTAGGATC  
AGGAAGAGTTGGGCAGGACTG-AAGCAATTCAAC-----AAG-----AACAGAAAG---  
GTAT-----GGGAGAGGTCA--TCTATC-AGTCTTAGATGATCTTGGCTAGAGTCCC  
TA-AACCATC-TTGATAAGATGAGGCATGAAAGA-----GTCTATAT-AAATGTCTC  
TTTAGCACTGCAG-AGGTCAGGG--AAATGGTCATTTATTG-TAC-----AAGAA  
GGAAGGCTTCTTCCACAGTGGCAGAGGAAATGGAAGAGAAACCTTCTGCTT

>Pta

TGTCCTCCAGCTAAACTGCTGCAGCCACTCACAGGTCATGCCTCCTGCTAGAGTGCCAG  
AGAC--CTGAAGAAAAAAAAAAAAAAAAAACTTTGAGAGGAGCAATTAACCTGACAACC-  
--TGCCACCAGCCCACT-----CCCCAAGCTTGAACCTAAAATGCTGT  
CAAAAT---TGTGTGTGTGTGTG-----TGTGTGTGTGTGTGTGTGTGTGTGTGTG  
TGTGTAAATTG-----TATATCCAGT-----

-----ATCTTTGCCAAGAGAACCCTAAATAGGGTC  
ATGAAGAGTTGGACGTGATTA-AAACAGCTCGAC-----AACAG---AAATGTATGTAT  
ATATGTTTGT-AGGGAGGGTTCA--TCTATC-AGTCTTAAATGATCGTGGCTTGAG-CCC  
TA-----GACCAGACAT--GAGA-TCCTCAAGCCTACAC-AAATGTCTC  
TTCAGCACTGCAG-GGGCCAGGGTGGAGATATCATTTATTG-CACAGGAGAATAAAAGGA  
GGAAGGCTGCCTCTGTGAGGGCAGAGGGAACAGAAAAGAGACTTCCAGCTT

>Dgo

TGTCCTCCAGCTGAACTGCTGCAGCCACTCGCAGGTCATGCCTCCTGCCAGAGTGCCAG  
AGAC--CTGAAGGGA-----AAAACAACTTTGAGAGGAGCAATTAAGCCGACAGCC-  
--TGCCACCTGCCCACT-----CCCCAAGCTTGAATCTAGAATGCTGT  
CAAAAT---TGTGTGTGTGTGTG-----TG  
TGTATAAATTG-----TATGTACAGT-----

-----  
-----  
-----ATCTTTGCCAAGAGAATCCTAAATAGGGTC  
ATGAAGAGTTGGACAGGATTA-AAACAACCTTGAC-----AACAT--AAATGGATGTAT  
TTATGTTTGT-AGGGAGGGTTTA--TCTATC-AGTCTTAAATGATCTTGCTAGAG-CCC  
TA-----GACCAGACAT--GAGA-TCCTCAAGCCTATAC-AAATGTCTC  
TTCAGCACAGCAG-GGGCCAGGGTGGGAATAGCATTTATTG-CACAGGAGAATAAAAAGGA  
GGCAGGCTGCCTCTGTGAGGGTAGAGGGAAC-----AGAACTTCCTGCTT

>Scr

TGTCCTCCAGCTGAACTGCTGCAGCCACTCACAGGTCATGCCTCCTGCCAGAGTGCCAG  
AGAC--CTGAAGGAA-----AAAAAACAACCTTGAGAGGATCAATTAAGCGTGCCA-CC-  
--TGCCCACTC-----CCTCAAGCTTGCCACCTAGAATGCTGT  
CAAAAT--NGTGTGTGTGTGTG-----TGTGTGTGTGTGTGTGTGTGTGTGTGTGTGTG  
TGTGTAAATTG-----TATGTCCAGT-----

-----ATCTTTGCCAAGAGAACCCTAAACAGGGTC  
ATGAAGAGTTGGATGTGATTA-AAACAACCTCAAC-----AACAT--AAATGTATGTAT  
ATATGTTTGT-AGGGAGGGTTCATCCCTATC-AGTCTTAAATGATCTTGCTTGTAGC---  
-----TCCTCAAGCCTACAT-AAATGTCTC  
TTTAGCACTGCAG-GGGCCAGGGTAGAAATGTCATTTATTG-CACAGGAGAATA---GAA  
GAAAGGCTACCTCTCTGAGGCCAGAGGGAATAGAAAAGAACTTCCTGCTT

>Pgu

TGTCCTCCAGCTGAACTGCTGCAACCATTACAGGTCATGCCTCCTGCCAAGGTGCCGAG  
AGAC--CTGGGGG-----AAAAAACTTGGAAGCAATTAAGCCAGACAGCAA  
CTTGTCAACTTCTCCACA-----CTTCCAGGTTGACACCTGTAATGCTGT  
CAAAAC--TGTATGTGTGATTA-----  
-----AATG-----TCTGTCTAGT-----

-----ATTTTTGCCAAGAAAACCCCAA-----  
-CAAAGAGCTGGATATGACTG-ACACAACCTTCAC-----AACAA---ATATAAATGTTT  
GTATGTTTGT-AGGGAGCAGTCA--TTTATC-AGTCTTAGATGACTTTGGCTAGAATACG  
TAGAGATATCTT-GACTAGACCAGATATGAGAGATTCCTCAAGCCTATAT-AAATGTTTC  
TTTAGCACTGCAG-GGGCCAGGGTGGAAATGTCATTTATTATATAAAGGGAACAAAAGGA  
GGAAGATTGCCTCAACAGAGGCAGAAGGAACAGAAGAGAACTTCCTGCTT

>Iso

TGTCCTCCAACCTGAACTGCTGCAACCATTACAGGTCATGCCTCCTGCCAAGGTGCCGAG  
AGAC--CTGGGGG-----AAAAAACTTGGAAGCAATTAAGCCAGACAGCAA  
CTTGTCAACTTCTCCACA-----CTCCAGATTGACACCTGTAATGCTGT  
CAAAAT--TGTATGTGTGATTA-----  
-----AATG-----TCTGTCTAGT-----

-----ATTTTTGCCAAGAAAACCCCAA-----  
-CAAAGAGCTGGATATGACTG-ACACAACCTTCAC-----AACAA---ATATAAATGTTT  
GTATGTTTGT-AGGGAGCGGTCA--CTTATC-AGTCTTAGATGACTTTGGCTAAAATA--  
TAGAGATATGTT-GACTAGACCAGATATGAGAGATTCCTCAAGCCTATAT-AAATGTTTC  
TTTAGCACTGCAG-GGGCCAGGGTGGAAATGTCATTTATTATATAAAGGGAACAAAAGGA  
GGAAGATTGCCTCAACAGAGGCAGAAGGAACAGAAGAGAACTTCCTGCTT

>Tro

TGTCTGCCAACCTGAACTGCTGCAGCCATTACAGGTCATGCCTCCTGCCAGGGTGCCAG  
AGAC--CTGGGGGG-----AAAATACTTGGAAGCAATTAAGCCAGACAACAG







-----  
-----  
-----GGGGGCAGCTAGGTGGTGCAGTGGATAGA  
GCACCAGTGCAGGAGTCAGGAGGACCTGAGTTCAAATCTCACCTC-AGACACTTGACACT  
CACTAGCTGTGTGACCTTGGGCAAGTCACTTAACCCCAATTGCCT-----  
-----  
-----  
-----  
-----

>Mdo

CAGCACATGGTGACGATGG--CTGGAACAGAGGAAGGGTTATTAACA-----  
-----CCAACTTCAT-----  
-----  
-----  
-----

-----CCTCCACCCCCTC-AAATGACCCTGCACTGTGGCTAAACAAGCTACTAAG--TTA  
GAAGCCATGACAGAGGAAGAGAG-----CA---TCTGTACAAACACAA---AGGAG  
CACTGT-----  
-----  
-----  
-----

-----TCT  
CAATAAA-----TGCAAAGAAATCC-----  
-----  
-----  
-----

-----ATGCAACCAC  
TCTTTT-CT-----AACCCATGTGACCAAG-TGGACA-GTGAACGATGTGCT-TGTGAG  
AAAGGG--CTCATGTTCTC-----ATTCCC-----ACCCCTTGAGGTAGGAACCCCA  
AGGCTTTAC--CTGAAGGTCCCCCGTTCAACATCCTGGCCGCTGAGCCGAATGTGGATCC  
CTTCTTTCAG

>Dvi

GAGCACATGGTGACGATGG--CTGGAACAGAAGATGGGGTTATTAACA-----  
-----CCAACTTNAT-----  
-----  
-----  
-----

-----CCCCACCTCCTC-AAATGACCCTGCACTATGGCTAAACAAGTTACTAAGTTTTTA  
GAAGCCAGGACAGAGGAAGAAAG-----CA---TCTGTACAGACACAA---TGGAG  
CACTAT-----  
-----  
-----  
-----

-----TCT  
TAATAAA-----CGCAAAGAAATCC-----  
-----  
-----  
-----

-----ATGCGACCAC



TCTTTT-CTAACCAAGACCCTTGTGACCGAG-TGGACAGGGCAATGATATGCT-TGTGAG  
AAAGGG--CCCCTGCTCTCTCTTATTACC-----ACCCCTTGAGGTAGGAAACCCG  
AGGCTTTAC--CTGAAGGTCCCCCGTTCAACATCCTGGCCGCTGAGCCGAATGTGNATCC  
CTTCTTTCAG

>Mnu

CAGCACATGGTGACGATGG--CTGGAACAGAAGACGGGTATTAAACA-----  
-----CCAACTTCAT-----  
-----  
-----

-----CCCCACCTCCTC-AAATGACCCTGCACTATGGCTAAACAAGTTACTAAGTTTTA  
GAAGCCAGGACAGAGGAAGAAAG-----CA---TCTGTACAGACACAA--TGGAG  
CACTAT-----  
-----  
-----

-----TCT  
TAATAAA-----CGCAAAGAAATCC-----  
-----  
-----  
-----

-----ATGCGACCAC  
TCTTTT-CTAACCAAGACCCTTGTGACCGAG-TGGACAGGGCAATGATATGCT-TGTGAG  
AAAGGG--CCCCTGCTCTCTCTTATTACC-----ACCCCTTGAGGTAGGAAACCCG  
AGGCTTTAC--CTGAAGGTCCCCCGTTCAACATCCTGGCCGCTGAGCCGAATGTGGATCC  
CTTCTTTCAG

>Rra

CAGCACATGGTGACGATGG--CTGGAACAGAAGAATGGTTATTAATA-----  
-----CCAACTTCAC-----  
-----  
-----

-----CCCCTTCCCTCCC-----AATCCTGCGCTGTGGCTAAACAAGCTGCTACG--TAC  
AAAGCCATGACAGAGGAAGTGAGCTCCCAAGCA---TCTGTTC-CACACAA--GGGAG  
CGCTGT-----  
-----  
-----

-----TTT  
CAATAAAAGCTGTCCAAAGAAATCA-----  
-----  
-----  
-----

-----GTAGGACTGC  
TATTTT-CAAACCAGGGCCTATTCCATTGAG-TGGACA-GTTAAGGATCTGCT---TATG  
AAAGGC--CTCAGACAGTCTATAATTCCC-----AACCCACCCAGGTGGGAACCCCT  
AGGCTTTAC--CTGAAGGTTCTCTTTCAACATCCTGACCGCTGAGTCGAATGTGGATCC  
CCTCTTTCAG

>Cfu

CAGCACATGGTGACGATGG--CTGGAACAGAAGAATGGTTATTAATA-----  
-----CCAACTTCAC-----  
-----  
-----



-----TCT  
TAATAAAAGCTGTCCAAAGGGACCAT-----CCTTTTCTTTCTTTCTT  
TTTTTTTGGGGAGGTAATCAGGGTTAAGCACCTGACCA-----GGGTCACACAGTAAA  
TATCCAAG-----GCCG-----AATTT-----  
-----

-----GAACTCAGGTTCTC  
CTGACACTAAGGCTGGTGCTCTATC-CACTATGCCACCTAGCTGCCCTTC-----AAGC  
TGCCCTAAGCTAAATGTGACAGCTATTTTCCAACCAA-GGCCCCTTCTGACTGAGTAGAC  
A---GT-AATGGTA-CACTTGTAATTTCC-----ATCCCCAAAGAGGTTGGAAGTACT  
AGGCTTTAC--CTGAAGGTTCCCTCGTTCAACATCCTGGCCACTGAGTCGAATGTGGATT  
CGTCTTTCAA

>Pta

TAGCACATGGTGACGATGG--CTGAAAAAGAAGAATAGTTATTAATA-----  
-----TCAACTTCCC-----  
-----

-----CTC-TCCCCCTC-AAATGACCCTGCACTATAGCTTCACAAGCTACACAG--TAA  
GAAACTATGATTGAGGAAGAGAGTTCCCAAAA---TCTGTACAAACATAAA--AGAGC  
ATTGTT-----  
-----

-----TT  
TAACCAAAGCTGCCCAAAGAAATCAGCATGACTG-----CTCTTTTCCTTTCTTTTC  
TATGATTTGG-AGACAATTAGGGTTAAATGACTTGCCC-----AGGTTACACAATAAG  
CGTCTGAG---ACCAC-----ATCT-----  
-----

-----GAATTCA-GTTCTC  
CTAAACTAGGGCTAGTGCTCCCCATCATTACACACCTCAGCGGCCTCTG--TGATTAC  
TCTTTT-CAAGCCAAGACCCC-ATTGACTAG--AGAG-CAGTAAGGATGTGCTTGTTAAG  
A---GT-TCTGA--TCTCTCTAATTTCC-----CTGCCA-----CAGAACTATT  
AGGCTTTAC--CTGAAGGTTCCCCGTTCAACATCCTGGCCACTGAGCCGAATGTGGATT  
CATCTTTTCAAG

>Scr

TAGCACATGGTGACGATGG--CTGAAAAAGAAGAATGGTTATTAATA-----  
-----TCAACTTCCC-----  
-----

-----CTCTCCCCCTC-AAATGACTCTGCACTGTAGCTTCACAAGCTACACAG--TAA  
GAAACCATG--ATTGAGGAAGAGTTCCCAAAA---TCTGTACAAACATAAA--AGAAC  
ATAGTT-----  
-----

-----TT  
TAACCAAAGTTGCTCAAAG-AATCAGTGTGACTG-----CTCTTTTCCTTTCTTTTC  
TATGTTTTGG-AGACAATTAGGGTTAAGTACTTGCCC-----AGGTTACAAAGTAAA  
CGTCTGAG---ACCAC-----ATTT-----  
-----

-----GAACTTA-GTTCTC  
CTAAAACCAGGGCTAGTGCTCCATC--ATTACACACCTTAGCTGCTTCTG--TGATTTC  
TCTTTT-CAAGCCAAGGCCCTACTGACTAAGATG--G-CAGTAAGGATGTGCTTATTAGA  
G----C-TCTGA----CTCT--AATTCCC-----CTGCCCA-----AAACGCT  
AGGCTTTAC--CTGAAGGTTCCCCGTTCAACATCCTGGCCACTGAGCCGAATGTGGATTC  
CATCTTTCAG

>Mfa

TAGTACATGGTGACGATGG--CTGAAAGAGAAGAATGATTATTAATA-----  
-----TCAAC-TTTC-----  
-----  
-----

-----CCTCTTCCCCCTC-AAATAACCCTGCACTGTGGCTTCACAAGCTTCACAG--TAA  
GAAATCATG--ATAGAGAAAGAGTTCCCAAAA----TCTGTACAAACATAAT--GGAAC  
AATATT-----  
-----  
-----

-----TT  
TAACTAAAGTTGCCCAAAGAAATCAGCATGACTG-----GTTTTCTCCTTTGTCTTC  
TACGTTTTGG-AGACAATTAGAGTTAAGTGACTTGCCC-----AGGTTACAGAGTAAG  
CATTTGAG----GCCAC-----ATTT-----  
-----  
-----

-----GAACTCA-GTTCTC  
CTAAAACCAGGGCTAGTGCTTTATC--ATTACATACCTTAGCTGCCCCCA--TGACTAC  
TCTTTT-CAAGCCAAGGTCTTCAGATTGAG--AAAG-CAGTAAGGATGTGTTTGTTACA  
AAGAGG-TCTGA----CTCTCTAATTCCC-----ATGTCC-AAGGTGGTGGAAAGTGCT  
AAGCTTTAC--CTGAAGGTTCCCCGCTCAACATCCTGGCCACTGAGCCGAATGTGGATTC  
CATCTTTCAG

>Bil

TAGCACATGGTGACGGTGG--CTGGAACATAAGAATGGTTATTAATA-----  
-----TGAACTTCAC-----  
-----  
-----

-----CCCTTTCCCCCTC-AAGTGACTCTGCACTGTGACTAAACAAGCTACTAAG--TGA  
GAAGCCATGATAGAGGAAGAGAGCTCCCAGGCA----TCTGTACAAACACAA--AGGCG  
CACTAA---TTTTTTTTTT-ACTGGACTAATTTCTTTATTATTTTTTCATATACCACA  
ACTTGTGAGTAATT-GTCAAATGATGGCAATGGTTAAAGAGCACTATTCTTTAAAAAT  
TT-----TTTTATTTAATTAAGGCAA-TGGAGTTAAGTGACTTGCCCAAGGT  
CACACAGCTAGGTAAATTATTAGGTGTTTGAAGCTGGATTTGAACTCAGGTCCTCCTGAC  
TCCAGGGCTGGTGGTCTATCTACTGTGCCACCTAGTTGCCCAA--GGAGCACTCTT--  
-AATAGAAATTGTCCAAAGAAATCAGTCAGTCTGC-----TCTTTTCTTCTCTTTC  
ATTTTTTTGG-AGGCAATAAGGGTTAAGTGACTTATC-----  
-----TGAGG---CTGGATTT-----  
-----  
-----

-----GAACTTAGGTCCTC  
CTGACACCAGGGCTGGTGCTCTTTG-----TCATTTAGCTTCTCCTG--CAACTTG  
GTTTC--CATACCAAGGTCTCACAACCTGAG-TGGACAGGAAGGGTTCACACT-----  
-AAGG-----TTCTAATTCTC-----ATCCCC-----AGTGAGAACTACC  
AGGTTTTAC--CTGAAGGTTCCCCGTTCAACATCCTGGCCACTGAGTCGAATGTGGATCC  
CGTCCTTCAG

>Pgu

TAGCACATGATGACGGTGG--CTGGAACATAACAAGGATCATTAATA-----  
-----CGAACTTCA-----  
-----  
-----CCTTTTCCCCTTC-AAATGACTCTGCACTGTGGCTAAACAAG-TTCTAAG--TGA  
GAAGCCATGACAGAGGAAGAGAGCTCCCAGGCA---TCTGTACAAACATAA--AGGAG  
AACTA---TTTTTTTTTTAACTGAAATAATTTCTTTTATTA-TTTTTTATTTACCACA  
ACTTATTTAATAATT-GTCAAATGATGGCAATAGTTAAGGAGCACTATTCTTTTAAAAA  
AA-----TTTTATCTATTTAAGGCAA-TGGAGTTAAGTGAAGTGGCCCAAGGT  
ATCACAGCTAGCT-AATTATTAAGTGTCTGAGGCTGGATTTGAATTCAGGTTCTCCTGAC  
TCCAGGGCCGGCGCTCTATCCACTGTGCC-----CCAG--GAAGCACTCTTTT  
TAATAGAAATTGTCCAAGAAATCAGTTCAGCTGC-----TCTTTTCTTTT  
TCTTTTTTGG-AGGCAATAAGATTTAAGCAACTTACC-----  
-----CGAAG--CTGGATTT-----  
-----  
-----GTATTTACATCCTC  
CTGACACCAGGGCTGGTGCTCAATG-----TCATCTAGCTTACTCTG--CAACTTG  
GTCAT--CATACTAAGGCCCTATGACT-TG-T--GAGGAAGGGTTTATGCT-----  
-AAGG-----TTCCA-TTCAC-----TATC  
AGGTTTTAC--CTGAAGGTTCCCCGTTCAACATCCTGGCCACTGAGTCGAATGTGGATTC  
CGTCCCTCAG

>Iso

TAGCACATGGTGACGGTGG--CTGGAACATAACAAGGATCATTAATA-----  
-----CAAACCTTCA-----  
-----  
-----CCTTTTCCCCTTC-AAATGACTCTGCACTGTGGCTAAACAAG-TTCTAAG--TGA  
GAAGCCATGACAGAGGAAGAGAGCTCCCAGGCA---TCTGTACAAACATAG--AGGAG  
CACTAA--TTTTTTTTTTAACTGAAATAATTTCTTTTATTA-TTTTTTATTTACCACA  
ACTTATTTAATAATT-ATCAAATGATGGCAATAGTTAAGGAGCACTATTCTTTTAAAAA  
AA-----TTTTATCTATTTAAGGCAA-TGGAGTTAAGTGAAGTGGCCCAAGGT  
ATCACAGCTAGCT-AATTATTAAGTGTCTGAAGCTGGATTTGAATTCAGGTTCTCCTGAC  
TCCAGGGCCGGCGCTTTATCCACTGTGCC-----CCAG--GAAGCACTCTTTT  
TAATAGAAATTGTCCAAGAAATCAGTTCAGCTGC-----TCTTTTCTTTT  
TCTTTTTTGG-AGGCAATAAGATTTAAGCAACTTACC-----  
-----TGAAG--CTGGATTT-----  
-----  
-----GTATTTACATCCTC  
CTGACACCAGGGCTGGTGCTCTATG-----TCATCTAGCTTACTCTG--CAACTTG  
GTCAT--CATACTAAGGCCCTATGACT-TG-T--GAGGAAGGGTTTATGCT-----  
-AAGG-----TTCCAATTCTC-----ATCCCCACTGGGATGAGAACTATC  
AGGTTTTAC--CTGAAGGTTCCCCGTTCAACATCCTGGCCACTGAGTCGAATGTGGATTC  
CGTCCCTCAG

>Tro

TAGAACATGATGACNATGG--CTGGAAGAGAAGAATGGTTATTAATA-----  
-----CCAACCTTCA-----  
-----  
-----ACCTTTCTCCCTC-AAATGACACTGCACTATAGGTAAACAAGCTCCTAAG--TGG  
GAAGCCAGGGCAGAGGAAGAGAGCTCCTCAGCG---TCTGCACAAACACAAC--AGAGT



TGT-----AAAACA---CTGGATTT-----  
-----  
-----  
-----GAACTCAGGTCCTC  
TTAACACCAGGGCTGGTGCTCTATCC-ACTCTGCCACCTGGCTGCCATA---TGACTAC  
TCTTTT-CAATCCAAGGTCCCATGAC-TAAGTGGACA-GTAATGATAACAATT---GTAA  
GAAGGAG-CTCAGGCTATCTCCAATTCCC-----ATTCTTGA-TGAGGTGCTAACCCT  
ACGCTTTAC--CTGAAGGTTCCCCGTTCAACATCCTGGCCGCTGAGCCTAACGTGGATCC  
CGTCTTTCAA  
>Mr o  
TAGCACATGATGACGATGG--CTGGAACAGAAGAATGGTTATTAATA-----  
-----CCAACTTCAC-----  
-----  
-----TCCCTTCCCCCTC-AAATGACCCTGCACTGTGGCTAAACAAGTTACTAAG--TGA  
GAAGCCATG--ATAGGAAGATATCTCCCAAGCATCTACCTATACAAACAAC--AGAGT  
GCTATT-----  
-----  
-----  
-----CC  
TAATAAAAGCTGTCCAAGAAATCAGAGCAACCAAACATA-----CTT  
TTTATTTTGG-AGGCAGTTGGAGTTAAGTGACTTGCC-----AGGGTAA----GTAAG  
TAAGTATG----TAAGA---CTAGATTT-----  
-----  
-----GAACTGAAGTCCTT  
CTAACACCAGGGCTGGTGTTCTATCC-ACTGTGCGATCTGGCTGCCATG--AGACTAC  
TCTATT-TAAACCAAGGCCCATGACTGAG-TGAACA-GTAATGATACGACT--CTGAG  
AAAGAG--CTCAGGCTATCTCCAATTCCAATTCCTATCCTCAA-TGAGGTGGTAAGCACT  
AGGCTTTAC--CTGAAGGTTCCCCGTTCAACATCCTGGCCGCTGAGTCGAATGTGGATGC  
CATCTTTTCAAG  
>Vur  
TAGCACATGATGACGATGG--CTGAAACAGAAGAATGGTTATGAACT-----  
-----CCAACTTCAT-----  
-----  
-----CCCCTTCCCCCTC-AAATGACCCTGCACTGTGGCTAAACAAGCTCCTAAG--TGA  
GAAGCCATGACAGAGGAAGAGAGCTCCCAAGCA----TCTGTACAAAAACAAT--GAAGC  
ACTGTT-----  
-----  
-----CT  
TAATAAAAAGCTGACCAAAGAAATCAGTGCAACTGC---TCTTTTCTTTCTTTCTTTCTT  
TTTTTTCTGG-AGGCAGTCAAGGTCAAGTGACTTGCCC-----AGGGTCACACAGTAAG  
TAAGTGTC----TAAGG---CCGGATTT-----  
-----  
-----GAACTCAGGTCCTC  
CTGACACCAGGGC-----TAGTGCCCTT---TAACCCC  
TCTTTT-TAAACCAAGGACCCCATGACTGAG-TGGACA-GTAATGATACACTT--GTGAG  
AAAGGG--CTCAGGCAATCTCCTATTTCC-----ATCCTCAT-TGAGGTGGTAACCCT

AGGCTTTAC--CTGAAGGTTCCCCTTTCAACATCCTGGCCGCTGAGCCGAATGTGGATCC  
CATCTTTCAG





-----GAATTTTAACATGTGATTCATTGTATAAAAATTCATTCAATACATTTCG  
GC--TTTGTTTTTTATGTAAT-----

-----TACTAT--ACATG  
TT-----TCATAAGTGG-GTATGTGTGTAGAGGTTTTTT--CTAGTATAGTTTTAC  
AA-T--GATTATTCTTTTA-TGCTT-GTGCCACTTTATATCTTTTAAAAATTCATTTTTA  
A-CATTTTCTTTTTAGTT-----

-----GGAGTCCCTTCTACAGTTATGGCTTACATTAA  
GTCTAAATTCTAATTCCTCTGGAAGTAAAGAACATGGA

>Dvi

CTATGCTAAGTACTTGCTTCAACAAACTTTTTTCCATGCTTCAAGTTCATCATGTTTCAG-  
-GTATGGCCCTAAGA-----AAACATGAAGTTAT--GTTCTT-----  
-----TGAGGAATCATGATTATATTTACAAGTTACAGTATTAGATG  
AAAA-GGTTTATGGAAAAA-----  
-----TTATTTTGACACTTGATTCAATGTATAAAAATTCACTCAATACAATAG  
AC--TTTATTTTTTATGTAAT-----

-----TACTAT--ACATG  
TT-----TCATAAGTGGTGAGTATGTGTAGAAGTTTTT--CTAATACAGTTTTAG  
GAAT--GATCATTCTTTTA-TACTT-GTGCCACTTCATACCTTTGGTTCCAGATTTGAAA  
A-CAATTATTTATTTTTT-----AAGCAGAAATTGTATGTAATGGG  
GGGTTGCAAAGGTCTCAGTTGATTGAGAGTCAGGTCTAGAGGTGGTACATCTGGAAATC  
AGTTCTGTGCCCTTCAATATTTCTTGGTGTAGGCAAGA-----

-----AACCAATACACAGTATTGATTTTAAGATGGAAAAAAA  
--TGTTAAAAAAA--TTTTTTTAACTGAAATAATAAGTTGTATGTAACATAATGGAGG--  
AAAT-AAGATGGCAAGAGCAAATGTCTATCATGAATATAATTATTTATATAACCTTTAA-  
ATGTGTTTCA-ATTTTAAAAAATTATACTATTGACTGTACCAACCTTTTAAAAATTTTCA  
TTTTGTTATTTACTTTTT--AG--TTGGAGTCTCTTCTACAGTTATGGCTTACATTAA  
GTCTAAATTCTAATTCCTCTGGAAGTAAAGAACATGGA

>Mnu

CTATGCTAAGTACTTGCTTCAACAAACTTTTTTCCATGCTTCAAGTTCATCATGNTCAG-  
-GTATGGCCCTAAGA-----AAACATGAAGTTAT--GTTCTT-----  
-----TGAGGAATCATGATTATATTTACAAGTTACAGTATTAGATG  
AAAA-GGTTTATGGAAAAA-----  
-----TTATTTTGACACTTGATTCAATGTATAAAAATTCACTCAATACAATAG  
AC--TTTATTTTTTATGTAAT-----

-----TACTAT--ACATG

TT-----CCATAAGTGGTGGGTATGTGTAGAAGTTTTT---CTAATACAGTTTTAG  
GAAT--GATCATTCTTTTA-TACTT-GTGCCACTTCATACCTTTGGTTCAGATTTGAAA  
A-CAATAATTTATTTTTT-----AAGCAGAAATTGNATGTAATGGG  
GGGTTGCAAAGGTCTCAGTTGATTTAGAGTCAGGTCTAGAGGTGGTACATCTGGAAATC  
AGTTCCGTGCCCTTCAATATTTCTTGGTGTAGGCAAGA-----  
-----AACCAATACACAGTATTGATTTTAAGATGGAAAAAA  
--TGTAATAAAT--TTTTTTAACTTAAATAATAAGTTGTATGTAACCTAATGGAGG--  
AAAT-AAGATGGCAAGAGAAAATGTCTATCATGAATATAATTGTTTATATAACCTTTAA-  
ATGTGTTTCA-ATTTTTAAAAATTATACTATTGACTGTACCAACCTTTTAAAATTTTCA  
TTTTGTTATTTACTTTTTTTTTTAG--TTGGAGTCTCTTCTACAGTTATGGCTTACATTA  
GTCTAAATTCTAATTCCTCTGGAAGTAAAGAACATGGA

>Cfu

-----  
-GTATGGCAGTGAAA----ACACATGAAATTATCATTTTTT--CTTAGGAATTCACCT  
AAGATA-GTGATTATGT--TTAGAA----TAAAGATTTGATG-----TTGGAGTGGG  
AGAT-GGTTTACAGAAAA-----  
-----GTGTTCTGACATTTGATTCAATGTATCAAAGCTAATTC AAGGCTGCAG  
TC--CTTATTTTGATGTAGT-----  
-----  
-----

-----TACTAT--ACATA  
GA-----GTTACACAA----TTAGTGTATATGTTTTTAT--ATAGTGCAGTTTTAT  
AATTAACATTATACTTCTA-TATTT-GCGTTGCTATATAGTATTATGTCCAGATTTGAAA  
A-CAGTTTTTATATATTA-----  
-----  
-----

-----CCTAAATAGAACTTTTAATGAGTTGTATTTAATTT---AGG--  
AAAT-GAGCTGGCAGGAG-----TTTACATAATCTTTAA-  
ATAGGTTTCT-GTTTTTAAAAC-TTAAACTGTTAGCTATACCAATATTTTATAAATTAAT  
TTTTAATATTTACTTTTT---AG--TTGGAGTCACTACTACAGTTATGGCTTACATTA  
-----

>Dg1

CTATGCTGAGTAATTGCTTCAACAACTTTTTTCCATGCTTCAAGTTCATCATGTTTCAG-  
-GTATGACACTGAGA----ACACATGAAATTATCATTTTTT-GCTTTATGTATTCATTG  
AGGAAAAGTATTATGT--GTAGAA----GTAATATTTTGGGGAGTAAAATGTTGGGGA  
GGAA-GATTTATAGAAAA-----  
-----GTATTTTGATATTTGATTGAGTGTATCAAATTT---CAAGACACAGG  
GC--TTTATTTTTATGTAAT--AACTATGTATATG-----AGGCAGTTCGGTGGAT  
AAAGTGCTATATCT----GGAGTC-----TTCTTC-CTGAGTTC AATCCAGCC  
TCAGATACTTGTCACTCAGCCACCTGTGTGACCCTGGACAAATCATATAGCCCTATTTGC  
CTCAGTTTCTCATCTGTAAAA-TGAGTTGG-AGAAGGA-----  
--ACAACAAACCACTC-CAGTATCTTTGCCAAGAAAACCCCAAATGGGTTCATGAAGAG  
TGTGATTCGAATGAAAA-CGCTTGAAAAAT-----AACCTCT--GCATG  
TG-----GTTACAATAAATGAGGATGTATATAGGTTTTTT--CTAGTACAGTTTTAG  
TACCAAGATTATTTCTTTT--GTGTTGTGCTACTGTATAGCATTAGAATCAGATTTTAA  
A-CATTTATTTATTT-----  
-----  
-----

-----AATGTGAATTTAATAAATGCAACGAACTA--GGAAATA

AGAT-----GGAGTAAATGCTAAGCTGAAATAA--TTATTTACGTAATCTTTAA-  
TTGTGTTTCA-GTTTTTAAAAA-ATGTACTGTTGGCTATACAAACCTTCTAAAGCTTCAT  
TTTTAAATATTTACTTTTT---AG--TTGGAGTCCCTTCTACAATTATGGCTTACATTAA  
GTCTAAACTCTAATTCCTTCTGGGAATAAAGAACATGGA

>Nty

CTATGCTTAGTACTTGCTTCAACAAACTTTTTTCCATGCTTCAAGTTCATCATGTTTCAG-  
-GTATGGCAGTGAAA-----ATTCAGGAAACTATGATTTTTTT-GCTTTATGCATTCATTG  
TGAAAATTGAGTCTGT--GTAGAA-----GTAACGATTTGATATTA--TTTATTGGGGA  
GAAA-GGATTTTTAGAAAA-----  
-----GTATTTTGATGTTTGATTGAGTACATCAAAATT----CAAGACACCAG  
TC--TTTATTTTTATGTAAT--AACTGTGCTTATG-----GGGCAGTTAGAATG-A  
AAAGTACTGGGCCT-----GGAGTTAAGAAGACTCATCTTC-CTGAGTTCAGATACAGTC  
TCAGAAACGT-----ATTACCTGTTTCACCCTGGACAAGTCATGTAACCCTGTTTGC  
CTCGGTTTCTTCATTTATAAAAATTAGCTGG-AGAAGGA-----  
--AATGGCAAGCC--TC-CAGTATCTTTGCCAAAATAACCCCAAATTGGGTCAAGAAGGG  
TTGGACTTGACTGAATATCGACAATCTATT-----CATATA-AT---  
-----TACTTA--TGTGAGGATTTAAATAGTTTTTTTTTC-CTAATACAGTTTTTAG  
GA-CAAATAATATTTAA-----GGTTTTGTACTGTATAGCATTAAAGACCGGATTTTAA  
A-TATTTATGTAAATTTT-----  
-----  
-----

-----ACTGAAATTTTAAATAAGTTTTATGCAACTAATCTGGG--  
AAAT-AAGATGACAGGAACAAATGTTGAGCTGGAATAAAATTTATTTACATCATATTTAA-  
TTATGTTTCA-GTTTTTAAAAA-TTGTACTGTTGACTATAACAA-TTTTTTAAACTTCAT  
TTTTAAATATTTTT-----AG--TTGGAGTCTCTTCTACAATTATGGCTTACATTAA  
GTCTAAATTCTAATTCCTCTGGTAATAAAGAGCATGGA

>Pta

CCATGCTAAGTGCTTGCTTCAACAAACTTTTTTCCATGCTTCAAGTTCATCATGTTTCAG-  
-GTATGACACTGAAA-----ACATATTAATTTGTCATTTTTTTTACTTTAGACATTCATTG  
AGGCAAAGTGTGTATAAAA-----GTGAAGATGTTGTGTAGTGTGTGTGAAG  
TTAG-ATTTGGTTTTTTTTGTCTTTTTTTTAA-----  
-----GTATTA-GACATTTGATTGAGTCAAAATT----CAAGACAGCCG  
GC--TTTATTTTTATGTAAT--AATTATGCATATG-----AGACGTATGGAT  
AAAGTGCTAGACCTAGAGTCAAGTCAGAAAGACTCATTTTC-CCAGGTTCAAACGTTATC  
TCAAATACTT-----ACTAGCTTTGTGACCCTAGATGA-----GAAACCTGTTTGC  
CTCAGTTTCTCATATGTAACA-TGAGTTGG-AGAAGGA-----  
--AATGGCAAACCA--C-TAATATCTTTGTCAAGAAAAACCCA-----TATAAGGAT  
--ACATGTAACTGAATAGCAACAACCCATGCCTTTAGTT-----ACATAAG-TTACA  
TA---TATAAGTAG-----TAACATGTTACATATAGGTTTTTTT--CTAGTATAGCTTTAG  
GA-TTAAAATTATTCCTTT-GTGTTTGTGCTACTGTAT-GCATTATGATCAGATTTTAAA  
A-CATTTGTGAATTT-----  
-----  
-----

-----AACAG-----TGAATAAAGTGTATATAATTAACCTAGA--  
AAAT-AAGATGGTAGGAGCAAACCTTAATCTGGAATATTACTTTTTTCTTAATGATTAA-  
GTATGTTTCA-GTTTTTAAAAA-TTGTCTGTTGAATATATCAAGCTTTTTTAAATTTTCT  
TTTTAATGATTACTTTTT---AG--TTGGAGTCCCTTTTACAATTATGGCTTACATTAA  
-----

>Dgo

-----  
-GTATGACACTGAAA-----ATACACTAAATTATCATTTTTTTTACTTTAGACATTCATTG

AGGCAAAGTGTGTATAAAA-----GTGAAAATGCTGTGTTAGTGTGTTGTGAAG  
TTAG-ATTTGTTTTTTTTTTGTTTT-----  
-----GTTTTT-GACATTTGATTCAGTGAGTCAAAATT----CAAGACAGCAG  
GC--TTTATTTTTATGTAAT--AATTATGCACGTG-----AGATGTATGGAT  
AAAGTGCTAGACCTAGAGTCAAGTCAGAAAGACTCATTTTC-CCAGGTTCAAATGTTACC  
TCAAATACTT-----ACTAGCTTTGTGACCCTAGATGA-----GAAATCCACTTGC  
CTCCGTTTCCGCATGTGTAACA-TGAGTTGG-AGAAGGA-----  
--AATGGCAAACCA--C-TAGGATCTTTGTCAAGAAAAACCCCA-----TATAAGGAT  
--ACACTTAACTGAACAGCAACAACCCGTGCCTTTAGTT-----ATATAAG-TTATA  
TA--TATAAGTAG--TAACATAAGTTTACATATAGGTTTTTTT--CTAGTATAGCTTTAG  
AA-CTAAAATTATTCCTT-GTGTTTGTGCTACTGTAT-GCATTATTATCAGATTTTAAA  
A-CATTTATGAATTT-----

-----AACAG-----TGAATAAAGTGTATACAACCTGACCTAGA--  
AAAT-AAGGTGGTAGGAGCAAACATTAATCTGGAATATTACTTTTTTTCATAATGATTAA-  
GTATGTTTCA-GTTTTTAAAAAACTGTCCTGTTGACTATACCAAGTTTTTTAACTTTCT  
TTTTAATGACTACTTTTT---AG--TTGGAGTCCCTTCTACAATTATGGCTTACATTAA  
-----

>Scr

-----  
-GTAGGGCACTGAAAATTTCACTCTAAGTTATCAATTTTTTACTTTTAGGCATTCATTG  
AGGCAATGTATGTATAAAA-----GAAGATGTTGTTTTAGTGTGTTGGGAAG  
TTAG-ATTTTTTTTTTTTTA-----  
-----ATATTA-GACATTTGATTCAGTGAGTCAAAATT----CAAGACAC--  
-----TAATCTTTATGTAAT--AATTATGCATAGG-----GGACATATGGAT  
AAAGTGCTAGACCTAAAGTCAAGTCAGAAGGCCTCAGTTTTT-CCAGTTTCAAATGTCACC  
TCAAATACTT-----ATTAGCTTTGTGACCCTAGATGA-----AAAACCTGTTTGC  
CTCAGTTTCTCAGATGTAACA-CGGGTTGG-AGAAGGA-----  
--ATTGGCAAACCAA-C-TAGGATTTTTGTCAAGAAAAATCCCA-----TATAAGGAT  
--ACACTTAACTGAACAGCAACAACCCATGCCTATAGTT-----ACAAAAA-TTACA  
TA--TAA--GTAG--TAATATAAGTT-ACATATAGGTTTT-----AGCTTTAG  
A--CTAAAATTATTCCTTT-GTGTTTGTGCTACTGTAT-GCATTATGATCAGGTTTTTAAA  
A-CATTTATGAATTT-----

-----AACAG-----TGAATAAAGTGTATATAACTAATCTAGA--  
AAAT-AAGGTGGTAGGAGCAAACATTAATCTGGAATACAACCTTTTTTTCATAATGATTAA-  
GTATGTTTCA-GTTTTTAAAAA-TTGTCTGTTGACTATACCAAGCTTTTTTAACTTTCT  
TTTTAATGACTACTTTTT---AG--TTGGAGTCCCTTTTACAATTATGGCTTACATTAA  
-----

>Bi l

-----  
-GTATGTCAGTGAGA----GCACATGTAATTGATTTTTTTTTTTTTGCCNCATTTCATTC  
ATTTGAAGTAATTATGT-----ANAGCTTTAAAGGTTTAATATTAANAGGGTTGGGGAA  
AAGG-TTTATCANAANA-----  
-----ATATTTTGCCATTTGATCCATTGTGTCAAAATT----CAAGATCCCAT  
GTGTTATACTTTTATGTTAT--AACTATGCACATG---GGGTAAT-----TAGGGGAAT  
AAAGCGCTGGACCT-----GGAGTCAGGAAGACTCATTTTTTCTGAGTTAAATCTTGCC  
CCAGACACTT-----TTCCCTGTGTG-ACCTGTACGTGTGATGTGATCCTGTTTGC  
CTA--TTTTCTCATCTCTAAA-----GTTGG-----

--AATC----ACTA----TAATAGCTTTGCCATGAATACCCTGAATAGGGTCATGAAGAA  
TTGTATTTGACTGAAAA-TAACTGAATAATGTTGTTACATAAG---ATATATAT-GCATG  
TA-----GTTTTGTAA-ATGTGGGTGTAAATAAGTTTTTTTC-CTGGTACAATTTT  
GCCTTGAC-TTATTTT---GTGTTTGTGCTCCTATATAGCATTGACCAGATTTTTTAA  
A--ATTTAAGTATTTAT-----

-----ATAATAGAAATTTTAATAAATTGTTTGAACTAATATATG--  
AAAT-AAGATGGTAGGAGCAGATGTTATGCTTGAATGTAATT-----CACAACTCT-----  
TTATGTTTTA-CTTTTTAA---TCATATTGTTGCTATTCTAACTTTTTTAAAGCTTTGT  
TTTCAATAA---TTTTT---AG--TTGGAGTCTCTTCTACAATTATGGCTTACATTAA

>Tro

-----GTATGGCACTGAGA----ACACATGA----TCATTTTTTTCATTTATTCATTCACTT  
AGGAAAAGTAATTTTGT-----TAGAAGTAAGGATTT-----AAGTGTGGGCAG  
AAAG-GTTTATAGACAAA-----  
-----GTATTTTAACATTTGTTTAAAGTATATGAAAATT---CAAGTCACCAG  
TC--TTTATTTTATGTAAT---AACTATGCATATG---GGTTTAT--CTTTAGTTGGAT  
AAAGTGCTGAACCT-----GGAGTCAGGAAGACTTACCTTC---AAGTTCAAATCTGGCC  
CTCAGGCATT-----TAATGTCTACGT-AACCTGGACAAGCCACATAT--CTCTTTGT  
CTAAG-TTCCATATCTATAAAA-TGAGTTTT-AGAAGGAAGTAGTAGTATCTTTAGTATC  
CACTTTAATATCCACTT-TAGTATCTTTGCCAAGAAAACCCCAAATGGAGCTATGAAGAT  
TTGGGCTAGACTGAAAA-CGACTGATCAAC-----AAT-TTAT-GCATG  
TA-----GTTACATAA-ATGGGCATGTATATAGGTGTATTT-CTA-GTATAGTACTA  
GGATTAACATTTTTTTGTGTGTGTTTATGCTACTTTATAGCATTAGAGCCAGATTTTTTAA  
GATACTTGTATTTTTTAT-----

-----TTAACAGAAATTTTAATAAACTATAAGTAATG----TAGG--  
AAAT-AAGATGACAGTATCAAATGTTGAGCTGCAATATAATTATTTAAATAATCCCTTAA  
GTATGTTTCA-GTTTTTCAAAA-TTGTCTCTTGACTATAACCAACCTTTTCAAGCTTTAT  
TTT-AATATTTACTTTTT---AG--TTGGAGTCCCTTCTGCAATTATGGCTTACATTAA

>Ppe

CCATGTTGAGTGCTTGTTCACAAAACCTTTTTTCCATGCTTCAAGTTCATCATGTTTCAG-  
-GTATGGCACTGAGA----ACACATGAAATATCATTTTTTT-GCCTTTTACATTCATTT  
AGAAACACTAAT-ATGT--AATATGTAGAAGTAAGGATTTGATGCTAGTGTGTTGGAAAG  
AAAG-GTTTATAGAAAAA-----  
-----GTATTCTGACATTTGATTAAGTGTATCAAAATT---CAAGTCATCAG  
TC--T-----AT-----CTAT-----AGGCAGAT  
AAAGTGCTGAATCT-----GATGTCAGGAAGACTCATTTTT-ATAAGTTCAAATCTGGCC  
TCAGATGTTT-----ACTATCTATGTAATCCTGGACAAGTCACATAGCCCTATTTGT  
CTCAG-TTCCCTTATCCGTAAAA-TGAGTTGT-AGAAGGA-----  
--AATAGTAACTACTT-TAGTATCTTTGCCAAGAAAACCCCAAATAGGGCCATGAAGAT  
TTGGACTAGACTGAAAA-CAACTGACCAAC-----AACTTAAT-GCATG  
TA-----GTTATATAA-GTGGGGGTGTATATAGGGGTTTTTTTTC-CTAACATTTTT  
GGAAAAAGATTATTTCTTTT-GTGTTTATGCTACTATATTGCATTAGAACCAGATTTTTTAA  
AACACTTGTGTTTTTAT-----

-----  
-----TTAACAGAAATTCTAATAAATTTTATGTAACATAATGTAGG--  
AAAT-AAGATAACAGGAGCGAATGTTAAGCTAGAATATATTTATTTGCATAATATCATAA  
ATATGTTTCA-GTTTTTAAAAA-TTGTACTGTTGACTGTACCAACCTTTTTAAGCTTAC  
TTTTAATATTTACTTTTT---AG--TTGGAGTCTCTTTTGCAATTATGGCTTACATTAA  
GTCTAAATTCTAATTCCTCTGGGAATAAGGAACATGGA

>Tvu

-----  
-GTATGGCACTGAGA-----ACACATGAAATTACCATTTTTT-GCTTTATGCATTCTTTT  
AGGAAAAGTAATTATGTG-----TAGAAGTAAAGATTTGATGTTAGAGTATTAGGGAG  
AAAG-GTTCATATAAAAA-----  
-----CTGTCA-----AGAAAGTGTCAAAATT---TGAGACATGGG  
GC--TTTATTTTTATGTAGT---AACTATGCTTATA---GGACTAT--GCATCGTTGGAT  
AAAGTGTGGACCT----ATTGTCAGGAAGACTCATCTTC-ATAAGTTCAAATCTGGCC  
TCAGGCATTT-----ACTACCTGTGTGACCCTGGACAAGTCACAGAACTCTTTTTGC  
TTCAG-TTCCTTATCTGTAAAA-TGAGTTGG-AGAAGGA-----  
--AATAGCAAACAGCTC-CAGTATCTTTGCCAAGAAAACCCCAAATGGGGCCACAAAGAT  
TTGGACTTGACTGACTG-ATAATGACTGACCAGC-----AACTTAAT-GCGTG  
TA-----GTGGGGATGTATATAGGTTTTTTT-CTA-GTATAGTTTTA  
GGACTAAGATTATTCTTTT-ATGTTTATGCTGCTGTGTAGCATTGTACCAGATTTTTTAA  
AACATTTATGTATCTA-----

-----GCAGAAATTTTAAATAATCATATGCAACTAATATAGG--  
AAAC-AAGATGGCAGGAGCAGATGTTAAGTTGGAATATAATTATTAACATAATCTCTAA-  
GTATGTTT---GTTTTTAAAAA-TTGTACTGTTGACTATACCAACCTTTTTAAGCTTGAT  
TTTTAAAAATTTTTCTTTTT-AG--TTGGAGTCCCTCCTACAATTATGGCTTACATTAA  
-----

>Mr o

CCATGCTGAGTGCTTGCTTCAACAACTTTTTTCCATGCTTCAAGTTCATCATGTTTCAG-  
-GTATAGCACTGAGA-----ACACATGAAATTGTAATTTTTT-GCTTTATACATTTCATAT  
AGAAAAAGTAATTTTGTG-----TGAAAGTAGAGATTTGATGTTAGAGTGTGGAGAG  
AAAA-GTCTGTAGGAGAA-----  
-----GTATTT-----GTATCAAAAGT---CAAGACACCAG  
GC--ATTATTTTTATGTAAT---AACTATGCACATG---CGGCTATGGGGATAGGTGGAT  
AAAATGCTGGCCGT----GGAGTCAGGAACAGTCATCATC-ATAAGTTCAAATCTGGCC  
TCAGACATTT-----ACTACCTGTGTTACCTTGAAAGGTCACATAACCCTGTT-GC  
CTCAG-TTCCTTATCTTTAAA--TGAATTGGGAGAAGGA-----  
--AATAGCAAACCACTC-CAGTATCTCTGCCAAGAAAACCTCAAATGGGGCCGTGAACAT  
TTGAACTCACCTGAAAA-CTACTTACCAAC-----AACTTAAC-GCATG  
TA-----GTTATATAA-GTGGGGATGTTTATAGGGTTTTTT-CTA-GTATAGTTTTA  
GGACTAAGATTATTCTTTT-TTGTATTATGCTACTATATAGCATTAGGACCAGATTTTTTAA  
AACATTTCTGTACTTAT-----

-----TTAATGGAAATTTTAAATAAATTATAGGTAATTAATACAGG--  
AAAC-AAGATGACAGGAGCAAATGTTAAGCTGGAATATAATTATTTACATGATCTCTAA-  
GTATGTTTCA-GTTTCAAAAAA-TTGTACTGTTGGCTGTACCAACCTTTTTAAGCTTCAT  
TTTTAATATTTACTTTTT---AG--TTGGAGTCCCTTCTACAATTATGGCTTACATTAA  
GTCTAAACTCTAATTCCTCTGGGAACAAGGAACATGGA

>Ptr

CCATGCTGAGTGCTTGCTTCAACAACTTTTTTCCATGCTTCAAGTTCATCATGTTTCAG-  
-GTATAGCACTGAGA-----ACACATGAAATTGTAGTTTTTT-GCTTTATACATTCATAT  
AGGAAATGTAATTATGTG-----TAAAGTAGAGATTTGATGTTAGAGTGTGGAGAG  
AAAA-GTCTATAGAA-----  
-----GTATTTTGTCAATTTGATTAAGTGTATCAAAAGT----CAAGACACCAG  
GC--ATTATTTTTATGTAAT---AACTATGCATATG---CGGCTATGGGGATAGGTGGAT  
AAAATGCTGGATGT-----GGAGTCAGGAACACTCATCTTC-ATAAGTTCAAATCTGGCC  
TCAGGCGTGT-----ACTACCTGTGTTACCCTGGAAAGGTCACATA-CCCTGTC-GC  
CTCAA-TTCTTTATCTTTTAAA--TGAGTTGA-AGAAGGA-----  
--AATAGAAAACCACTC-CAGTATCTCTGCCAAGAAAACCTAAAATGGGGCCATGAACAT  
TTGAACTCAGCTGAAAA-CTACTTACCAAC-----AACTTA-C-GCATG  
TA-----ACATAC-GTGGGGATGTTTATAGGGTTTTTT-CTA-GAATAGTTTTA  
GGACTAAGATTATTCTTTT-TTGTTTATGCTACTGTATAGCATTAGGACCAGATTTTCAA  
ACCATTTCTCTACTTAC-----  
-----  
-----  
-----TAAAGGAAATTTTAAATAAATTATATGTAGTTAATACAGG--  
AAAC-AAGATGGCAGGAGCAAATGTAAAGCGGAAATATAATTACTTACATGATCTCTAA-  
GTATGTTTCA-GTTTCAAAAAA-TTGTACTGTTGTCTGTACCATCCTTTTTTTAGCTTCAT  
TTGTAATATTTACTTTTT---AG--TTGGAGTCCCTTCTACAATTATGGCTTACATTAA  
GTCTAAACTCTAATTCCTCTGGGAACAAGGAACATGGA

>Vur

CCATGCTGAGTACTTGCTTCAACAACTTTTTTCCATGCTCCAAGTTCATCATGTTTCAG-  
-GTATGGCGCTGAGA-----ACACGTGAAATTATAATTTTTTT-CCTTTATGCGTTCATTT  
AGGAAAAGTGATTATTTG-----TAGAAGATTTGATGTTAGAGTGTGGGGAG  
AAAG-GTTTATATAAAAA-----  
-----GTATTTTGACATTTAATTAATGTATCAAAATT----GAAGACA---A  
GC--TTTATTTTTCTGTAAT---AACG--GCATATG---GGGCTATGCATAG--GTGGAT  
AAAGTGTGGGACCT-----GGAGTCAGAAAGACTCATCTTC-ACAAGTTCAGATCTGGCC  
TCTGACATTGT-----GTGACTTGTGTGATCCTCGACAAGTCACATAACCCTGTTTGC  
CTCAG-TTCCTCGTCTGTAAAA-TGAGTTGG-AGAAGGA-----  
--AATAGCAAACACTC-CAGTATGTTTTCCAAGAAAACCCCAAATGGGGCCATGAAGAT  
TTGGACTCAACTGAAAA-CAACTGAACAAC-----AGCC-TGT-GCATG  
TA-----GTTACATAA-GTGGGAATGTATATAGGTTTTTT--CTA-GTATAGATTTA  
GGATTAAGATTATTCTTTT-GTGTTTATGCTATT-----AGGATGAGATTTTAAA  
A-CATTTATGTTT-----  
-----  
-----  
-----AGAAATTTTAAATA---TGTGTGT-ATGTATGTAGC-T  
AATC-TAGGAAATAAGAGTAAATGTAAAGCTGAAGTATAATTATTTACATA-AATTTAA-  
GTATGTTTTCATCTTTTTTAAAAA-TTATACTGTTGACTGTACAAATTTTTTTAAGCTTCAT  
TTTTAATATTTACTTTTT---AG--TTGGAGTCCCTTCTACAGTTATGGCTTACATTAA  
GTCTAAATTCTAATTCCTCTGGGAATAAAGAACATGGA





>Mdo

CCCAAGTAACCAGCAACAACAAAGGGACAGGGTGTGAGTTTGAGCTATGGGATTGTGGAG  
GAGATACAAA--GTAAGTGATCTCCTGTTTTCTTCTGAGAGATAGAGACAAAGACAGAA-

-----TGTGTGTGTT-----  
-----TAA-TGGATGATCAGAAAAATGGG-CTGAGATTCCCATCCTT-----  
-----AAA-----TCTATATCGTGTCTTGGCCCTTATGGGCCAGGATCCAGCATCT  
TCATCACCCCTACATTAATACAAGCAAGACACTCTAAGAAACACCCCTCCCCACAGGACC  
GAGGGACCGGTTTC-----

---TGATTCTGCTC--TTCCTTCTCT-GAAG--GTTTGAATCATGCTGGCCTGCCCTCA  
TGAAGGACTCTCATGGGGTCGTGATCATCTTCAACGCCGATATCCCA

>Dvi

CCCAAGTGACCAGCAACACCAAAGGCACAGGGTGTGAGTTTGAGCTGTGGGATTGTGGAG  
GAGATACAAA--GTAAGTGTTCTC-TGGTTTG-----AGAGAGAGA--CAGAGAGAA---

-----TGCGTGTGTT-----  
-----CA--TGGGTGGTCCTAAAGATGGGCTTTTCTAACAGGTCTGT-----  
-----GAACGATCATGTCTTGGCCCTGGTGGGCCA-GACCGAGCATCT  
TCATCACCCCTAGCTCAATACAAGCAAGAAGTGG-----  
-----CCCTCTC-----







-ATTTTGGGTGTTTCGT-GGCAAAGATACTGGAGTGGTTTCCCACTTCCTTCTCTAGCTCA  
TTTCACAGATGAGGAAACTGA-GGTAGGCAGGATGAAGTGACTTGCCCAGAGTCACACAG  
CTAATGAGGGTCTGAGGCTGGATGTGAACTCAGGATGATGAATCTTCCCAATTCCAAGCC  
CAGGGCTGTGCCCGCTGCACCAGCTAACTGCCCT---TGTG-TCTGTGTGTGTTT-----  
-----ACATAGGGTCT-CGTAAAAATGGCTTTCTCTAAAAGCAGTTTGC  
AGCCTTAAGCCTG---TAAATGTCTCTTCTTGGGCTTGATGGAGTGAGATCAATGAGCA  
TGTTTAC-----TGCAAACAGACAAGA-----CCCTCGAAGAA  
CACA--GCCCTCCCTGG-----

-----GCA---GACCC  
CC--TGACCAGGCTCTTGTCTTCCTCG-GCAG--GTTTGAATCGTGCTGGCCCCGCCCTCA  
TGAAGGATTCTCAAGGGGTGGTGTGATCATCTTCAATGCTGACATCCCCA

>Scr

CTCAAGTAACTAGCAACAACAAAGGGACAGGGTGTGAGTTTGAGCTGTGGGACTGTGGAG  
GAGATAGAAA--GTAAGTGTCTTTCAGTTTTCTCAG-----

-----GGGGAAGGGA  
GGGAGAGAGGGAAACAGAGGAGAGAGAGAGCGTGTGTGTGTGTGTGTGTGTGTGTGTGTG  
TGTGTGTGTGTGTGTGTGTGTGTTT-----TCCATTCATGTCTATTTGCCGACCC  
-ATTTTGGG---TCTT-GGCAAAGATACTGTTATGGTTTCCCATTTCTCCTCTGGCTCA  
TTTCACAGATGAGGAAACTGA-GGTAGGCAGGGTGAAGTGACTTGCCCAGAGTCACACAG  
CCAGTGAGAGTCTGAGGCTGGATTTGAACTCAGGATCATGAGCCTTCTGATTGCAAGCC  
CAGTGCTCTGCCCACTGCACCAGCTAACTACCCT---TGTG-TCTGTGTGTGTTT-----  
-----AAATAGGGGCT-CATAAAAATGGCTTTCTCTAAAAGCAGTTTGT  
GGCCTTAAGCCTG---TAAATGTCTTTTCTTGGCCTCGATGGACCAAGATCAAGCA---  
-----TGTTACCAAAAA-----CAGGCA-AGGCCCTCAAAG-A  
CACA--GCCCTTCCTGG-----

-----GCAG-CGCCGC  
CCC-TGACCAGGCTCTTGTCTT-----CCAG--GTTTGAATCGTGCTGGCCCCGCCCTCA  
TGAAGGATTCTCAAGGGGTGGTGTGATCATCTTCAATGCTGACATCCCCA

>Bi1

CCCAAGTAACTAGCAACAACAAAGGAACAGGGTGTGAGTTTGAGCTGTGGGATTGTGGAG  
GTGATACAAA--GTAAGTACCATCTGGTCTTCTTCC-----



-----  
-----  
-----  
-----GAGACAGACA  
GACACACAGAGACAGA-GGGGGCGGGGGT-----  
-----TTGCA-----TGTG-TCCA  
ATTTGGGGTTTTCTT-GGCAAAGGTACTAGAAATGGTTTACCATCTCCTTCTCTAGCACA  
T-----AATGAGGCAAA-----CA--GTGAAGTAGCTTGCCCAG-----  
-----GCC  
CAGTGCTCTCCCCACTGTGCCATCTTAAC-----TGTG-ATTGTGTGTGTT-----  
-----CAAATGGA--TCCA-----TGGAGTTTGG  
GCTTTTAAACCTC---TAAGTGTCTCCTCTTGGCCTTTATGGGCCACAATCAAGTATAT  
TTATCACAGGACAAACAAGACACAAAAATA-----  
-----CCCCTCCCTGG-----  
-----  
-----  
-----  
-----  
-----

-----TAAGATGCCCA  
AAC-TGACA-GGATCTCTTCCCTCTCT-GAAG--ATTTGAATCGTGCTGGCCTGCCCTCA  
TGAAGGACTCTCACGGGGTGGTGTGATCATCTTCAATGCTGACATCCCCA

>Tvu

CCCAAGTGACCAGCAACACCAAAGGAACGGGCTGTGAATTTGAGCTGTGGGATTGTGGAG  
GAGACACCAA--GTAAGTGCTTCCA-----  
-----  
-----  
-----  
-----

-----GGGGAGAGA  
GAGAGTGTGTGTGTT-----  
-----CCATTCACGTCCAACCCTTCATGACCCC  
CATTGGGGTTTTCTT-AGCAAAGCCACTGGAGCGGTTTACCGTTTCTTCTCTAGCTCA  
TCTTATAGATGAGGCAA-----GAGGGTGAAGTGACTTGCCCAGGGTCACACAG  
CTAGTAAGTGTCTCAGGCTACATTTGAACTGTGC-AGGTGAGTCTTCT-GATTCCAAACC  
CAGTTCACAACCCCATGTGTCCCCAAACTGCCCC-----GTGTGTGTT-----  
-----TACATGGAGGCCTATAAAAATGGCCTTCTCTAAATGTGGTTTGT  
GCCCTTAAGCCACATTTACAATCTCTCTTCTTGGCCTTTGTGGGCCAAGACCAAGCATAT  
TCATCACCGTACAAATGAGACATTTAAAGAAGTAT-----  
-----CCCCACCCT-----  
-----  
-----  
-----  
-----

-----GACAGGGCTTCTTTCTTCTCT-GCAG--GTTTGAATCATGCTGGCCCCGCCCTCA  
TGAAGGACTCCCATGGAGTGGTGTGATCATCTTCAATGCTGATATCCCCA

>Mro

CCCAAGTGACCAGCAACACCAAAGGCACAGGGTGTGAGTTTGAAGCTGTGGGATTGTGGAG







MARKER 142

>WSINE1

-----GAGGGGCAGCTAGGTGGTGCAGTGGATAG  
AGCACCAGCCCTGGAGTCAGGAGGACCTGAGTTCAAATCCAGCCTCAGACAC-----T  
TAC-TAGCTGTGTGACCCTGGGCAAGTCACTTAACCCCAATTGCCTCAAAAAAAAAA---A  
AAAA-----

>SINE1\_Mdo

-----TTTTTTTTTTTTTTTAAA  
CCCTTACCTTCCATCTTGGAATCAATACTGTGTATTGGTTCCAAGGCAGAAGAGTGGTAA  
GGGCTAGGCAATGGGGGTCAAGTGACTTGCCAGGGTCACACAGCTGGGAAGTGTCTGAG  
GCCAGATTTGAACCTAGGACCTCCCATCTCTAGGCCTGGCTCTCAATCCACTGAGCTACC  
CAGCTGCCCC-----

>Mdo

TGAAGGGGATGAGGTAGAG--GTAAGAACACTGAAGTTC-----  
-----TTCTAGCCCAGAAGATATATA-----CCCTCTCTC-----  
-----ATCACCACC-----TTTCTTTTTTGT  
CTCAG-TTACTTTTTTAGCTAAGATCATGAATACCC-TTTTA---TTAGTTTTGTTCAA  
TTGT--TCAACTC-TTTTCCATTGCTAGTTAGGTGAAGAATGGTAGGGAAGAGTGTCTG  
TCTTGTTTTGAGAAAAATCT-GCAAGGAAGAATCCTCACTCCCTCTGTGTTTTTAATTC  
CTATCTTAAGTACTCCTACATGACTGGGCTCTTAATA---TTTCTTGTAGTTTTAACCT  
CTTCCTTTTTCTTGCTGTTGCAATTTGCCAAACTTCC-----

-----  
-----  
-----  
-----AGAGA-----ATACCTC-TATTTTCAGTAAAAAACTTCCAACCTTCCCTC  
CCTTTAAGAT-----  
-----

-----AATAGAG-ATAGGTA-----TCAAAAATTTT-----ATGACTTCTT  
-GCTCATTCTGATTTAGCAGCAACCTTTTCC-----TTTTCTCTTGATTCAGAGG  
GACTCTAC-----AGGTTATCTGGATCATCTCTTA-TT  
TCTTCCCTAAC-----TCTAG--GTTTATTCCCGAGCCAACGAACAAGAGCCTTGTGGTT  
GGTGGCTGGCAAGGGTTC

>Dvi

AGAAGGGGATGAGGTAGAG--GTAAGAACACTGAAATTCTTCACCTTAAACTA-----  
----CCCCTTCTAGCCCAACAGACATATA-----CCCTTTCTTCTC-----  
-----ATCCCCA-----GTAACCACCTTTTACTTGTTCCTTTGT  
CTCAG-TTATTTTTTTAGCTAAGATCATGGATACCC-TTTTATTTATTAGTTTTTGTTCAAA  
TTAT--TTCACTN-TTTTCCATNGCTAGTTAGGNGAAAA--ATAAGG-AGAGTGTCTG  
TCTTGTNN--GAAAAAATAT-GCAAGGAAGGATCCTCACCCCTGTGTT-----C  
CCATNTTATGTATTCTTACATACCTGGGCTCTTA-----  
-----TTTTATTTT--AAA  
CCCTTACTTTCTGTCTTGAAATCAATACTGTGTATTGATTCCAAGGCAGAAGAGTACTAA  
GGG-TAGACATTGGGGGTCAAGTGACTTGACCAGGGTCCACACGGCTGGGAAGCGTCTGAG  
GCCAATTTTGAACCTAGGATCTCCTGTCTCTAGACATAGCTCTCAATCCACTGAGCCACC  
CATCTGTCCCC--AGAACACCTCTATTTT-AGTTTAAAAAACAAAAAAACCTCCTTC  
CCTTTAAGAT-----  
-----

-----AATAGAG-ATAGGTA-----TCTAAAATTTT-----AT-----  
-----CTGATATAGCATCAACCTTTTCC-----TTTTCTCTTGTTTCAGAGG  
GGCTCTAC-----TTT-GCAGGTT--ATTGGACAGTTTTTCAGGATCCCCTCTTATTT  
TCTTCTCTAAT-----TCTAG--GTTTATTCCCGAGCCAATGAGCAGGAGCCTTGTGGTT  
GGTGGCTGGCAAGGGTTC

>Mnu

TGAAGGGGATGAGGTAGAG--GTAAGAACACTGAAATTCTTCACCTTAAACTA-----  
----CCCCTTCTGGCCCAACAGACATATG-----CCCTTTCTTCTC-----  
-----ATCCCCA-----GTAACCACCTTTTAC---TTGTTTGT  
CTCAG-TTATGTTTTTAGCTAAGATCATGGATACCC-TTTTATTTATAAGTTTTTGTTCAAA  
TTAT--TTCACTC-TTTTCCATTGCTAGTTAGGTGAAAA--ATAAGG-AGAGTGTCTG  
TCTTGTNN--GAAAAAATAT-GCAAGGAAGGAACCTCACCCCTGTGTT-----C  
CCATCTTATGTATTCTTACATACCTGGGCTCTTA-----  
-----TTTTATTTT--AAA  
CCCTTACTTTCTGTCTTGAAATCAATACTGTGTATTGATTCCAAGGCAGAAGAGTACTAA  
GGG-TAGACATTGGGGGTCAA-----GTGACAGCTGGGAAGCGTCTGAG  
GCCAATTTTGAACCTAGGATCTCCTGTCTCTAGACATAGCTCTCAATCCACTGAGCCACC  
CATCTGTCCCC--AGAACACCTCTATTTT-AGTTTAAAAAAACAAAAAAACCTCCTTC  
CCTTTAAGAT-----  
-----

-----AATAGAG-ATAGGTA-----TCTAAAATTTT-----AT-----  
-----CTGATGTAGCATCAACCTTTTCC-----TTTTCTCTTGTTTCAGAGG  
GGCTCTAC-----TTT-GCAGGTT--ATTGGACAGTTTTTCAGGATCCCCTCTTATTT  
TCTTCTCTAAC-----TCTAG--GTTTATTCTCGAGCCAACGAGCAGGAGCCTTGTGGTT

GGTGGCTGGCAAGGGTTC

>Nty

AGAAGGGGATGAGGTGGAG--GTAAGAGCACTGAAGTTCCTTCCCCTCAGATACTCATT  
TTCTTCTATTCTCAGAAGACAGATACAGATA----TCTTCTCTCCTCCTGTG-----C  
TGCCCTCCCCCCA-TCC-----AC-TTACTACCTTTTACTTGTTCCTTTGT  
CTCAGTTAACCTTTTACGCTAAAATCATAGGTACCC-CTTTATTTATTAGGCTTGTTCAAA  
CTGTTT-CCCTCTCTTTCACCATTGCTAGTTAGGTGAAGA--ATAATG-AGAGTGTCTG  
TCTTGATT--GAAAGTATCT-GCAAAGAAGGAACCTCACCCCATAGGTATTTTAAATTC  
CTATCCTAAGCTCTCCTGCATGCCTGAGGTCTTGTATATTTTCATGCTGTAGCTTCAACCT  
GTCCCCTTTCCCTGCTGTTGTGATATGCCAGACTTCAAG-----

-----ACAGAGCCCCCATTTT-AGT-----AAAAGCTTTATC  
CTTTTAAAGAT-----

-----AATAGTG-AGAGGTA-----TCTAAAATTTT-----ATGTCTTCTG  
TACTCATTCTGATTAT-CA-GTACTCACCTC-TGGTTTCT-TTACTCTTGGTTCAGAGG  
GGCTCTAC---TTTGTCT-GCAGGTT--ATTGGACAGTTTCAGACACTACCTT-TATTT  
TCTTCTCTAATTTCC-TCTAG--GTTTATTCCCGAGCCAACGAGCAAGAGCCTTGTGGTT  
GGTGGCTAGCAAGAGTTC

>Scr

AGAAGGGGATGAGGTAGAG--GTAAGAGCTCTAAAGTTACTT-----  
-----AAAGTAAAAT-ACAGATA----CTTTCTCTTCTCCTGTGCTCAGCTTACC  
TCTATCCTACCCCATCCC-----ACTTTACTGTCTTTTACTTGTTCCTTTGT  
CCCAG-TTATCATTATCTAAGAGCCTGGATATCT-CTTTATTTGTTAGACTTGTTCAAA  
GTGTTT-TCCTCTCCTTACCCTGTTTGTAAAGTGAAGAATGATAAGG-AGAGTGCCTG  
TCTTGACT--GAAAATATCTGTAAAAGAGGGAACTTA-CCCCAGGTGTTTAAATTC  
TTATCTTAAGCTTTTCTGCATGCCTAAGGTCTTGTGAATTTCTGCTGTTG-----  
-----TTTCCCTGCTGTTCTGATATCCACATTTCAAG-----

-----AGAGAG--TCCTTTCC-ATT-----AAAAATTCCATA  
GTTTTAA-----

-----GATGATAGAGAGGTT-----TC-----ATGGCTTCTT  
-ATCCATTCTGATTAG-CA---GCTGTTGTC-TGGTTTCT-TTACTCTTGGTTTAGAGG  
GGTTCTACTTTTTTTTTTTTGTAGTT--ACTGGGCAGTTTCCAAGACTACCTC-TGTTT  
TCTTCTCTAATTTCCATCTAG--GTTTATTCCCGAGCCAATGAGCAGGAGCCTTGTGGTT  
GGTGGCTGGCAAGGGTTC

>Bil

AGAAGGGGATGAGGTGGAG--GTAAGGACACTGAAGTTCATTCCCTTAAATAGTCATTT  
CTAATC---TCGGAAGACAGAA-ACAGTTA----CCTTCTTCTCTCCTC-----  
-CCCATCTCCCCACCTC-----ACAGTTTCTACCTTTCACTTGTTCCTTTGT  
CTCAG-TTACCATTATCGAA-----GATTCCC--TTTATTTATTAGACATGTTCAA  
CTGTTT-CCCTCTCTTTCACTATTGTTAATTAGGTATAGAATGATAAGG-AGAGTGTCTG  
TCTTGATT--GAAAATATCT-GCAAAGAAGAACTTCA-CCCCTAGGTGTTTTAAATTC  
CTATCCTAAGCTTTGCTGCATGCCTGAAGTCTTGTGTTTTCATGCTAGAGTTTCAATTT  
TTCTCCTTTACATATC--ATAATATGCCAAATTTTAAAGAA-----

-----  
-----  
-----AGAGCTC-CC-ATCTC-AGT-----AAAAATTTTCATG  
CATTT-----AAGATAATAGAGAGA-----AGGGGCAGCTAGATGG-----ATAG  
AGCACTGACTCTGATGTCAGGAGGAAGTCAATCCTGCCTTAGACAGGTAATATT  
TACCTAGCTATGTGACCTTGGGCAAGTCAAGTAAATCTCATTGCCTTGTAATAA-----  
-----AAATAGAGAAGGGTA-----TCTAAAATCTCTTACCCATTCTATTAGTGGCT  
-ACCCATTCT-ATTAG-TG-GCACTCATCTC-TGGTTATTTTTTATTCTTGATTCAAAGG  
GGTTTTAC---TTTTATCT-GCAGGTT--ATTGGGCAGTTTCCAAGATCACTTC-TATTT  
TCTTCTCTAATTTCC-TCTAG--GTATATTCCCGAGCCAATGAGCAGGAGCCTTGTGGTT  
GGTGGCTGGCAAGGGTTC

>Pgu

NGAACGGGNTGANGTGGAG--GTAAGGACACTGAAGTTCCGTTCCCCTT-----  
-----CCCGCTTGAAGAG-----TCATT  
TNTAATCTGNCCCANTTC-----AGAGTTGCGACTNNTGAGTNGGTGNTTTGG  
CGCAT-TTACCATTTCGTCGGAAC-----GATTCCCTTGNATTTGTNAGACATGGGTCAA  
CTGTGTTCCCTCTCTTTCACTATTGTTAATTAGGTATAGAATGATAAGG-AGAGTGTCTG  
TCTTGATT--GAAAATATCT-GCAAAGAAGAACTTCA-CCCCTAGGTGTTTTAATTTTC  
CTATCCTAAGCTTTGCTGCATGCCTGAAGTCTTGTATGTTTCATCTA-GAGTTTCAATTT  
TCCCCCTTTACATAT---CATAATTGCCAAATTTTAAGGG-----  
-----

-----AGAACTC-CC-ATCTC-AGT-----AAAACTTCATG  
TGTTT-----AAGATAATAGAGAGA-----AGGGGCAGCTAGATGG-----ATAG  
AGCACTGACTCTGATGTCACGAGGACCTG-----CCTCAGACAAGTAATATT  
TACATAGCTATGTGACCTTGGGCAAGTCAATTAATCTCATTGCCTTTAAAACAAACAAA  
-AAA--AAGATAATAGTGGTA---TTATCTAAAATTTTC-----ATGACTTCTT  
-ACCCATTCT-ATTAG-TG-GCACTCATCTC-TGGTTACTTTTTATTCTTGTTTCA----  
-----GAGTGTT--ATTGGGTAGTTTCCAAGATCACTTC-TATTT  
TCTTCCCTAATTTCC-TCTAG--GTTTATTCCCGAGCCAATGAGCAGGAGCCTTGTGGTT  
GGTGGCTGGCAAGGGTTC

>Iso

AGAAGGGGATGAGGTGGAG--GTAAGGACACTGAAGTTCCCTTCCCCTTAAATAGTCATTT  
CTAAT---CTCAGAAGACAGAAACAGA-----TACCTTCTCTCTTC-----  
-CCCATCTCCCCACTTC-----ACAGTTTCTACTTTTCAGTTGTTTCTTTGT  
CTCAG-TTACCATTTCATCGAA-----GATTCCCTTT--ATTTGTTAGACATGTTCAA  
CTGTTT-CCCTCTCTTTCACTATTGTTAATTAGGTATAGAATGATAAGG-AGAGTGTCTG  
TCTTGATT--GAAAATATCT-GCAAAGAAGAACTTCA-CCCCTAGGTGTTTTAATTTTC  
CTATCCTAAGCTTTGCTGCATGCCNGAAGTCTTGTATGTTTCATCTA-GAGTTTCAATTT  
TCCCCCTTTACATAT---CATAATTGCCAAATTTTAAGGG-----  
-----

-----AGAACTC-CC-ATCTC-AGT-----AAAACTTCATG  
CGTTT-----AAGATAATAGAGAGA-----AGGGGCAGCTAGATGG-----ATAG  
CGCACTGACTCTGATGTCAGGAGGAAGTCAATTAATCTCATTGCCTTTAAAACAAACAAA  
AAAA--AAGATAATAGAGGTA---TTATCTAAAATTTTC-----ATGACTTCTT  
-ACCCATTCT-ATTAG-TG-GCACTCATCTC-TGGTTACTTTTTATTCTTGATTCA----  
-----GAGTGTT--ATTGGGTAGTTTCCAAGATCAATTC-TATTT  
TCTTCTCTAATTTCC-TCTAG--GTTTATTCCCGAGCCAATGAGCAGGAGCCTTGTGGTT  
GGTGGCTGGCAAGGGTTC

>Ppe

AGAAGGGGATGAAGTAGAG--GTAAGAGCACTGAAGTTCCTTCCCCTTAAATATGCACTT  
CTT---CTAGTCCAAGAA-GACAAAGA-----TTCTCTTTTCCCTTCCCTGTTCTCCCC  
TGCCATCTCCCTGTCCCC---CTGCCC-----CATTACCTTTCCTTCTTTCTTTGT  
CTCAG-TTACCATTTCAGCTAAGATCATGGATACCCCTTAGATTCTGTTAGGCTTGTTCAG  
CTGTTT-CCCTCTCTTTCCTGTTGCAAGTTAGGTGAAGAATGATAAGG-AGAGTGTCTC  
TCTTGATT--GAAAATATCT-GCAAAGACGGAAATTTATCCCATAGGTATTTTAAATTTT  
CTATCCTAAGCTCTCCTGCATGCCTGAGGTCTTGTATACATCATGCCGTAGTTTCAACCT  
GTCTCCTTTTCTCTGCTGTTCTGATATG-----  
-----  
-----  
-----  
-----

-----CCCCTAGCTC-AGT-----AAAACTTCATC  
CTTTTA-----  
-----  
-----

-----AGATAGTA-----ATCTAAAATTTT-----ATGACTTCTT  
-TCCATCCTG-ATTAG-CA-GCACTCATCTCTTGATTTCTTTT-ATTGTTGGTTTATAGG  
GGCTCTAC-----TTT-GCATGTTTTCCAAGTCAGTTTCTAAAACCATTTT-TGTTT  
TCTTCTGTAATTTTCTAG--GTTTATTCTCGAGCCAACGAGCAGGAGCCTTGTGGTT  
GGTGGCTGGCTAGGGGTC

>Vur

AGAAGGGGATGAGGTGGAG--GTAAGAGCACCGAAGTTCCTTCCCCTTAAATACTTATTT  
CTTCTA-GTTCCATCAGACAGATAACAGATAACTTTCTCTT-----TCCTCCCC-  
TGCCATCCCCCAGTCCCCTGCCTGCCCTTCCCATTTATTACCTTTCCTTGTCTTTGT  
CTCAG-TTACC-----ATTAGGCTTGTTCAAA  
CTGTTT-CCCTCTTTTTTACCATTGCTAGTTAGGTGAAAA--ATAAG--AAGTGTCTG  
TCTTGATT--GAAAATACCT-GCAAAG-----TTTAATTTT  
CTATCCTAAGCTCCCCTGCATGCCTGACGTCTTGTATATTTTTCATGCTGTAGTTTCAATTG  
TTCTCCTTTTCTTGTGTTCTGATATGCCATACTTCACG-----  
-----  
-----  
-----

-----AGAGAGCCCCCATCTCAAGT-----AAAACTTCATC  
CTTTTAAGAT-----  
-----  
-----

-----AATAGAAAAGAGGTA-----TCTAAAATTTT-----ATGGCTTCTT  
-CCCATCTG-ATTAG-CA-GCACTCATCTC-TGGTTTCTTTT-ACTCTTAGTT--AGG  
GGTTCTAC----TTTGTCT-GCAAGTT--ATTGGTCAGTTTCTAAGACCATCTC-TGCTT  
TCTTCCCTAATTTCC-TCTAG--GTTTATTCCAGAGCCAATGAGCAGGAGCCTTGTGGTT  
GGTGGCTGGCAAGGGTTC







CATCAAAACTCGGTAGATTCTC-----GT  
TCAGGGTAAAGAGGGGCCCTTTCGGCTAGCCTACATGTTAACCTTTGGCAGGGAGGAGTT  
GCTCCCCAC-----CC-CTAT-----CCTCTGCCCAA-----

-----TCTCAAAGATGG---AAAA  
ATAGA---AAGATAAAAA-----CTT-----TTCTT-----ATCTGTAAAACG  
AGGATGGAGCTGAC-----CTTGAGAAGGTTGTCATGAGCCTG-CTCAAG  
T-GAGATAATGTATGTATATAAT-GCATTTTGCAAACCTTGATA---CT---AAGCATAT  
-GTCCCATTTTTATTGCAAGA--AACCGATGA-GA--GTT-AAAAAGAATTTTAA--TC  
--AACTAGGGTA-----

-----ATCTCTC-----AGTAAGTCTTAGAAGAGAATTGACTTGC  
CCAAGGTTAGAGTGTCTACCATACTGTCTTTCT-GGTATGAGTCTAGGTATTGGGCTCT  
TGGTATGT--ATTAAACAGACTATAAAATAAGCATATCTCCTTTT-CTGGGGAAATTTTT  
AGCAATTATATTTTGGCA-AGTCATTCATTGGTAGCTTGTCTTANATGCCTTAGGTCTCT  
TT-GGTGACTCTTACTTTT-CAGGGATTC-----GTCT-AAA  
TATT--GCTTCTTAAAGAA-GTAAAAGATTT--TATTTATTCTTTACCAG--GATTTGGGA  
TGAATGGGAAATTTTCAACAACACATTTACTGGCATGTGGAT

>Mnu

-----AATGCCTACAGTGGCATTCTGGG-  
-GTGAGCTCACTGAATG-----CTACTTTTCTTTTTCAAACCATCTCCACCAC  
CATCAAAACTCAGTAGATTCTC-----AT  
TCAGGGTAAAGAGGGGCCCTTTCGGCTAGCCTACATGTTAACCTTTGGCAGGGAGGAGTT  
GCTCCCCAC-----CC-CTAT-----CCTCTGCCCAA-----

-----TCTCAAAGATGG---AAAA  
ATAGA---AAGAAAAAAA-----CTT-----TTCTT-----ATCTGTAAAACG  
AGGATGGAGCTGAC-----CTTGAGAAGGTTGTCATGAACCTG-CTCAAG  
T-GAGATAATGTATGTATATAAT-GCATTTTGCAAACCTTGATA---CT---AAGCATAT  
-GTCCCATTTTTATTGCAAGA--AACCGATGA-GA--GTT-AAAAAGAATTTTAA--TC  
--AACTAGGGTA-----

-----AGT-CTT-----AGAAGAGAATT-----GACTTGC  
CCAAGGTTAGAGTGTCTACCATACTGTCTTTCT-GGTATGAGTCTAGGTATTGGGCTCT  
TGGTATGT--ATTAAACAGACTATAAAATAAGCATATCTCCTTTT-CTGGGGAAATTTTT  
AGCAATTATATTTTGGCA-AGTCATTCATTGGTAACTTGTCTTAGATGCCTTAGGTCTCT  
TT-GGTGACTCTTACTTTT-CAGGGATTC-----GTCT-AAA  
TATT--GCTTCTTAAAAA-GTAAAAGATTT--ATTTA-TTTTTACCAG--GATTT-----

>Rra

-----AATGCCTACAGTGGAAATTCTGGG-  
-GTGAGCTCACTGGCTG-----TTAGCCTTCTTTATGAAAGAATCTCCC-----  
---CAAACCTCTGTAGATTCTT-----GT  
TCAGGGTAACTGGTTGGGCCTTTATCAAGCCTACA-TTTAACTCCCTACAGAAAGAAGCT  
GC-CTCCAC-----CT-TTCCT-----TCCCTCCCCAAA-----



TTTGGAG-ANGAAA-CTAGA----ANGAAAAAC-TTTTTTAAAAAATCTGCAAAGTG  
GAGCTAATTATAGCATAATGCTT---ATCACTCATAGGGCTGTCATGAGGTTG-CTCAGA  
T-GACAGAGTACAAGTAAA-----GCATCTTGCAAACATTCT-----ATTATGCATA-  
-TGTCATTGTTATAGAGGA--AACCAGTGA-GA--GCTAAAAAAGGATTTTAAAGTC  
--AATTCTGCTA---TTTCTCT---TGGCGGC-TGGATCGCTCAGTGGATAGAACACTA  
AGCCTGGAGTTGGGAAGACCAGAGTTCAAATC-TAGCCCCAACATTTGCTAGCTGTGTG  
ATCTTGGGCAAG----CCACTTAA-----CCT-----CT-GAGAAGGCAAG-  
ATA-----TTCCAGTATCTTTGCCAAGAAAACCCCTACACAGCAT--AGTACACAGGGTC  
ACAAAGAGTTAGACACAACACTCAAC-----ACAAGGCTAATCCCCTCACTTAA  
AGAC-----AGTG---AGT-CTT-----CTAGAGAATCT-----AATTTGT  
CCAAGGCTTCAGTGTCTATCAGCCTGTCTTTTT-GGTATGAGCCTGGATACTGAGCTCT  
TGGGATGTGGAATTTAAA---GGAATTTAAGC--ATCATCTTTT-CTGGGGAAATTTTT  
AGCTACTATGTTTTGACTGAGTCATTCATT--CATCTTT---TGTAAGATATAACTCAT  
TTTGGTGACTCTCAGTTTT-CATGGATTA-----GTGT-AAG  
TAGTG--TTTCTTGAGCA-GTAA--TGGGTTATATTTATTCTTTCCAG--GATTT-----  
-----

>Pta

-----AATGCCTACAGTGGAATTCTGGG-  
-GTGAGCTCACTGCTCTCTGCCTCCTTCTCCCCCTTCCCTTTTGAAGAACCTCTACTGT  
TCCCAAACTGAGTCAATTCTT-----GT  
TCAGGGTAAATGATGAGATA-----AACGTACAGACTAGTTTCTGAAAGGAAGAA-GC  
TGTCTGCTG-----TTCCCTCTCCCA-----TTCCAACCCA-----  
-----  
-----TTTTGGAGATGG---AAAA  
C--A--AAGAAAAGAG-----CC-----TTTTTTTA---AACTGTAAGATG  
GGAATAAC-----  
-----TTTTCGCAAATTTTCT-----GTTACATATA-  
-TGTCTATTTTTATTGAGGGA--AACCAATGA-GG--ACT-AGAAGGGATTTTAA--TC  
--TGCCCAGCTA--ATTGTC-----TGGACAG-----AATACTA  
GGCCTGAAGTCAGGAAGACCTGAATTCAAATT-----TGGCCTCAGACACTTACTATGTG  
AACCTGGCCAAG---TACTTAA-----CCTAATCC-ACTAGAGAAGGAAATG  
ATAAACCNACCAGTATCTTTGCCANGAAAACCC--TATGGACAG--GTCCCCAGGGTA  
GTGAACTGTTGGACAAGATTGAAC-----AGCAAATAACTAGTCCCTTCACTTAA  
AGAGAAGACAGTG--AGT-TTT-----AAAAGAGAATT-----GATTTGC  
TCAAGGCTGTAGTGTCTACCATATTGTCATTTTTGGTATGAGCCTAGTTATAGGGCTCT  
TGAAATGT--ATTAATA---GGCTTTTAAGC--ATTACCTTTT-CTGGGTAAAATTTT  
AGCACTGATGTTTTGAGGATATCATTCATTGATACCTTG---TATTAGAC---ATTCAT  
TTTGGCGATTG--AGTTTTTCATGGATTATGTGTATA-TAATAAG-----TGATGC-AAG  
TAA-----TTCTTGAGT-TGTAA--TGGGTTGTATTTATTTTTTCCAG--AATTTGGA  
TGAATGGGAAATTTTCAACAACACATTTATTGGCATGTGGAT

>Dgo

CACAATGTCACACAGCATGAACAGACTTTCGGTTGGAATGCCTACAGTGGAATTTTGGG-  
-GTGAGCTCACTGCTCTCTGTCTCCTTCCCCTCCTTCCCTTTTGAAGAACCTCTACCGT  
TACCAAACTGAGTCAATTCTT-----GT  
TCAGGGTAAATGATGGGATG-----AACCTACAGACTAGTTTCTGGAAGGAAGAA-GC  
TGTCCGCTG-----TCACC-TCTCCCC-----TTCCAACCCA-----  
-----  
-----TTTTGGAGATGG---AAAA  
CTAGA--AAGAAAAGA-----GCTATTTTTTTCTTTTTTTTA---AACTGTAAGATG  
GGAATAAC-----  
-----TTGCAAATTTTCT-----GTTACATATA-

-TGCCCATTTGTTATTGAGGGA---AACCAATGA-GG--ACT-AGAAGAGATTTTAA--GC  
-----TGGGCAG-----AATACTA  
GGCCTAAAGTCAGGAAAACCTGAATTCAAATC----TGGCNTCAGACACTTACTATGTG  
AATCTGGCCAAG----TACTTAA-----CCTAATCC-CTAGAGAAGGAAATG  
ATAAACACACACCAGTATCTTTGCCAAGAAAACCC--TATGGACAG---GTCCACNGGGTA  
GTG-----  
-----AA-----GAGTTCG  
ACAAGAT-----TGTTCTACCATACTGTCATTTTTGGTATGAGCTTAGTTATAGGGCTCT  
TGAAATCT---ATTAAAA---GGCTTTTAAGC--ATTACCTTTT-CTGGGTAAAATTTT  
AGCACTGATGTTTTGGGGATATCATT-----CATTAGAC---ATTCAT  
TTTGGCGATTG--AGTTTTTCATGGATTATATGTATG-TAATAATAAA--TGATGC-AAG  
TAA-----TTCTTGAGTA-GTAA--TGGGTGCATTTATTTTTTCCCAG--AATTTGGGA  
TGAATGGGAAATTTTCAACAACACATTTATTGGCATGTGGAT

>Mfa

CATAATGTCACACAGCATGAACAGACTTTCCGATGGAATGCCTACAGTGGAATTTTGGG-  
-GTGAGCTCGCTGCTCTCGGCTTCCCTCCCTCCCT-CCCTTTTTTAAAGAACCTCTACTGT  
TCCCAAAACTCAGTCGATTCTT-----GT  
TCAGGGTAAATGATGGGGTG-----AACCTACAAACTGCCTTCTGGCAGAAAGAA-GC  
TGTTTTGCC----ATCCCTCTCCCA-----TTCCAACCCA-----  
-----  
-----TTTTGGAGATGG---AAAA

CTAGA---AAGAAAAGAAAA---CC-----TTTTTTT-----AACTGTAAGATG  
GGGTAA-TAATATCATAGTGCTT--ATTACTTTACAGGGTTGTCATGAGGCTGGCTCAGA  
T-GAGATAATTTATGTATA-----GCAGTTTGCAAATTTTCT-----ATTACCTGTA-  
-TGTCATTATTTATTGAGGGA--AACAAATGA-AG--ATT-AGAAAGGACTTTAA--TC  
--TTCCAGCTA--ATTCTC-----TGGGCAG-----AATACTA  
GGCCTGCAGCCAGGAAGAGCTAACTGCAAATCAAATCTGGCCTCAGACACTTACTATGTG  
ATCTGGGCCAAG-----TTA-----CCTAATCC-CTAGAGAAGGAAATG  
ATAAACACACACCAGTATCTTTGCCAAGAAAACCTC--TATGGAGAG--GGGCCACAGAGT  
AAT-----GAAGTTAGATGAGA--TTGAATGGCAAAGTAGCTAATCCCTCACTTA  
AAGATAAGAC-----AGAAGAGAATT-----CATTTGC  
TCAAGGCTGTAGTATTCTATCATACTGTCTTTTTT-GGTATAAGCCTGGTTATAAGGCTTT  
TGAGATGT---TTTAAAA-GGCTTTTTTTTAAGC--GTTACCTTTT-CTGGGTAAAATTTT  
AGCTCTGCTGTTTTGGGGATGTCATTCATTGATACCTTG---TATTAGACATAATTCAT  
TTTGATGACTC--AGTTTTTCATGGATTATGTGTAGCTTAATAATTA-----ATGC-AAG  
TAA-----TTCTTGA---GTAAA-----TTGTATTTATTTTTTCCCAG--GATTTGGGA  
TGAATGGGAAATTTTTCAGCAACACATTTACTGGCATGTGGAT

>Pgu

CACAATGTCACGCAGCACGAACAGACGTTCCGTTGGAATGCCTACAGTGGAATTCTGGG-  
-GTATTGAGC-----CTTCTTTTTTTTGAAGAACCTTGATCAT  
TCCCAAAACATGG-GATGTATT-----CT  
TCAGGGTAAATAAATA-GGTG-----ATCCCAAAACCTAACAATTGGCCAGAAGAA-GC  
TGCCTGCTG-----CCCTCTGTTGTCCCTTATAATTCCCAACCCA-----  
-----  
-----TTCTAGAGATGGGG-AAAA

CTAGG---AAGAAAACAA-----CTA-----TTTT-----ATCTGTAAAATG  
GAGGTAATAATTTACCACT-----GTTATTGAGGAACACCAGTGAGA-GCTAAAAAAGA  
T-TTTTAAAGAAAAAATTA-----GCTAATTCCT---GGGCTGGACAGGCT-  
-----AAGCCA---GG--AATCA-GG---A-AGATTGGACTTCAGA-TC  
CAACCTCAGGC---ATTTAC-----TATAACTA  
TG--TGATCTTGGG-----CAAATC-----

-----ACTTAA--CTTTTGTTCCTAATCCATTGCAAGAAGAAAATG  
ACAACCCATTCCAGTATTTTTGCCAAGAAAGCCC--CATTGAATG---AACCCATGGTTC  
ATTGGGTGGTGAAGAGTTGGAGAAGTTATTTAATAACAAA--TCTAATCCTTTCACTTA  
GAGAAAGCTG-CG---AGT-CTT-----AGAAGAGAATT-----GTTTTGC  
CCAAGGCTGCAGTGTCTACCATACTGCTTTTTTG-GAATGAACC-TAGATGTAAGGCTCT  
TGGAATAT--GTTAAATA-----GAATTTAAGT--ATCATCTTTT-CTGGGTAAATTTTT  
AGCAATTA-----TGGCTGAGTTATTCATTGGTAGATTA----TGTCAGAC--AACTCAT  
TTTGGTGACCCCTAGTTTT-CATGGATTA-----GTCT-AAG  
TGTT-GGTTTTCTTAAGTA-GTAA--TGGT-TATTTTTATTCTTTCCTAG--GATTTGGA  
TGAATGGGAAATTTTTCAACAACACATTTACTGGCATGTGGAT

>Iso

CACAATGTCACACAGCACGAACAGACGTTCCGTTGGAATGCCTACAGTGGAATTCTGGG-  
-GTAAGCTCACTGGCTA-----TTGAGCCTTCTTTTTTTGAAAGAACCCTGATCAT  
TCCCAAACATGG-GATGTATT-----CT  
TCGGGTTAATAAATA-GGTG-----ATCCCAAACCTAACAATTGGCCAGAAGAA-GC  
TGCTTGCTG-----CCCTCTGCTGTCCCCTTATAATTCCCCCAACCCA-----

-----TTCTGGAGATGGGGGAAAA  
CTAGG---AAGAAAACAA-----CTA-----TTTT-----ATCTGTAAAATG  
GGGGTAATAATTTACCACT-----GTTATTGAGGAACACCAGTGAGA-GCTAAAAAGA  
T-TTTTAAGAAAAAATTAA-----GCTAATTCCT---GGGCTGGACAGGCTC  
AGTGGATAGAACACTAAGCCA--GG--AATCA-GG---A-AGATTGGACTTCAGA-TC  
CAACCTCAGGC---ATTTAC-----TATAACTA  
TG--TGATCTTGGG-----CAAATT-----

-----ACTTAA--CTTTTGTTCCTAATCCATTGCAAGAAGAAAATG  
ACAACCCATTCCAGTATTTTTGCCAAGAAAGCCC--CATTGAATG---AACCCATGGTTC  
ATTGGGTGGTGAAGAGTTGGAGAAGTTATTTAATAACAACAATCTAATCCTTTCACTTA  
GAGAAAGCTG-TG---AGT-CTT-----AGAAGAGAATT-----GTTTTGC  
CCAAGGCTGCAGTGTCTACCATACTGCTTTTTTG-GAATGAGCC-TAGATGTAAGGCTCT  
TGGAATAT--GTTAAATA-----GAATTTAAGT--ATCATCTTTT-CTGGGAAAATTTTT  
AGCAATTA-----TGGCTGAGTTATTCATTGGTAGATTA----TGTCAGAC--AACTCAT  
TTTGGTGATCCCTACTTTT-CATGGATTA-----GTCT-AAG  
TGTT--GTTTTTTAAGTA-GTAA--TGGT-TATTTTTATTCTTTCCTAG--GATTTGGA  
TGAATGGGAAATTTTTCAACAACACATTTACTGGCATGTGGAT

>Tro

-----AATGCTTACAGTGGAATTCTAGG-  
-GTGAGCTTATTGGCTC-----TTAGT-CTTTTTTTGAAAGAACCCTATACCAT  
TCTCCAAATTCGGAAGATTCTT-----GT  
TCAGGATAAATGGTGGGGTG-----ATTCTACAGACTAAC-TCTGAGAGTAAGAA-GT  
GACCTCCCC---TCC-----CCCCGAACTAA-----

-----TTTTGTACAAGG---AAAA  
CGAGA---AA-----CTTTT-----TTTTTTT-----GAAATG  
GGAATAATAATATAGTG-----GTTACTTCATAGGGTTG-TATGAGGCTG-CTCAGA  
T-GAGATAATGTATGTAAA-----GCATTT--CAAACCCTGT-----ATTATGAA-----  
-TGTCCAATGTACTGAAGGA--AACCAATGA-GA--GTG-AAAAAGAATTTTAAAGTC  
--AATT-AGGTA--GTTTTT-----TGGGCAGCTAGACTGCTCAGTGGATAGAATACTA  
GGCCTGGAGCTAGGAAGACCTGAGTTAA-----  
-----GCCGTTACCTTAAAGCTCTCTCTGCCTAATGT-GCTGGAGAAGAAAATA  
GCAACCTAT-GGACAAGTATGG-----TCCC--CAGGAATCAT-----  
-----GACAAGCTGGACAATCCCCTCACTTA

GAGAAAGACAAGG---TAT-CTT-----AGAAGAG-----  
-----  
-----TAAATTTTT  
AGCC-----GTTCACTGGGAGCTCA---TGTTAAACATAATTCAC  
TTTGTGGACTTTCCGTTTT-CATGGACTG-----GTTT-AAG  
TATT--GCTTCTTGAGTA-GTAA--TGGGTAAATTTATTCTTTCCAG--GATTTGGGA  
TGAATGGGAAATTTTCAACAATACATTTACTGGCATGTGGAT  
>Ppe  
CACAACTCACACAGCATGAACAGACTTTCCGTTGGAATGCTTACAGTGGAATTCTAGG--  
-GTGAGCTCACTGGCTA--ATAGTCTTCTCTTTTGAAAGCACAAAAGAACATCCACCAT  
TCCCCAAACTTGGTAGATTCTTGAAACCTCCACCATTTCCCCAACTCAGTAGATTCTTGT  
TCAGGATAAATTGT-GGGTG-----ATCCTATAGACTAACTTCTGAGAGTAAGAA---  
-GCTAA-----CTCCTTACTCCCCA-----TCCCCAACCCA-----  
-----  
-----CTTTGTACATGG---AAAA  
CTAGG---AAGAAGGAAA-----CCTTT-----TTTTAA-----ATCTGTAAAATG  
GGAATAACAATACAATG-----TTTACTTCATAGGGCTGTTATGAGGCTG-CTCAGA  
T-GAGATAATGTATATAAA-----GCATTTTGCAAACCTTGT-----ATTATGCA-----  
-TGTCCAGAGTTATTGAGGGA--AACCAATGAAGA--GTT-AAAAAGGATTTTAAAGTC  
--AATTCAGCTA---ATTCTC-----TGGGCAGCTAGATGGCTCAGTGAATAGAACAGTA  
GGCCTGGAGTTAGGAAGACCTGAGTTAAAATC-----TGGTCGCGGACATTTACAAGCTA  
TATTACCTTAAGCANGTTATTTAAC-CTCTCTTTGCCTAATCT-GCTGTAGAAGAAAATG  
GCAACCCATTCCAGTATCTTTGCCAAGAAAACCCC-CACGGACAATATGGTCCACAGGGT  
CATGACAGGCTGGACATGACTG-----AACAAGGCC---AATCCC-TCACTTA  
GACTTAGAAG-----AGAATTG-----ACTCGT  
CCAGGGCTTCAAGTGTCTACCGTACTGTCTTGCT-GATGTGAGTCAAGATATAGGGCTCT  
CGAGATAT--GTTAAAAG---GAATTTAAGT--ATCATCTTTT-CTAAGTAAATGTTT  
AGCGATTGTGTTTTGGCTGAGTTGTTCGTTGGCAGCTCA---CATTAGACATAACTCAT  
TTTGCTGACTCTTAGTTTT-CATGGATTA-----GT-----  
-----GCTTCTTGAGTA-GTAA--TGGGTAATATTTATTCTTTCCAG--GATTTGGGA  
TGAATGGGAAATTTTCAACAATACTTTTACTGGCATGTGGAT  
>Tvu  
CACAACTCACACAGCATGAACAGACTTTCCGTTGGAATGCCTACAGTGGAATTCTGGG--  
-GTGAGCTTAGTGGCTC-----TTAATCTAAGAACCTCCACCAT  
GCCCCAAACTCGGTAGATTTTT-----GT  
TCAGGATGAATGGTGGGGTG-----ATCCTACAGACTAACTTCTGACAGTAAGAA-GG  
CCTGCTGCC-----TCGTT-----CCCCAACCCA-----  
-----  
-----TTTTGTATATGG---AAAA  
CTAGA---AA-----C-----TTTTT-----ATCTGTAAA-TG  
GGGATGATAATATTGTAGCA-----CTTATTCATAGGTCTGTCATAAGGCGG-CTCAGA  
T-GAGATAACAGATGTAAA-----GCATTTTGCAAACCTTGT-----ATTATACAG-----  
-TGTCCATTGTTATTGAGGGA--AACCAATGA-GA--G--AAAAAGGATTTTAAAGTC  
--AACCCAGCTA---ATTTCTG-----TGGACAGCTAGATGGTTCAGTGAATAGAACACTA  
GGCCCGAATCAGGAAGAACGGAGTTAAAATC-----CGGTCTCAGACATTTACTAGCTG  
TGTGACTTTGAGCAAGTCATTTAACCACCTCTTTGCCTAATCCAATTGGAGAAGAAAATG  
GCAACCTGTTCCAGTATCTTTGCCAAGAAAATTC--CACAAACAGTACAG--CTCAGAGT  
CATT-----AAGAGTT---GGGCATGACTGAACAACCTG-----TCGCTTA  
GAGAAAGACAGTG---AGT-CTT-----AGAAGAGAATT-----GATTTGT  
CCAAGCCTGCAGTATTCTGTCATATTGTCTTTTT-GATATGAGCCTAGATAGAGA----T  
TAAGATAG--GTTAAAAG--G---GAATTTAAGC--ATCACCTTTT-CTGGGCAAATTTTT

AGCAATTATTTTTTGGCTGAGTCGGTCATTGGTAGCTCA----TGTTAGACATAACTCAT  
TTTGATAACTCTTGGTTTT-CATGGATTA-----GTGT-AAG  
TATT--GTATCTTGAGTA-GTAA--TGGGTATATTTATTCTTTCCAG--GATTTGGGA  
TGAATGGGAAATTTTCAACAATACATTTACTGGCATGTGGAT

>Mr o

CACAACGTCACACAGCATGAACAGACTTTCCGTTGGAATGCCTACAGTGGAAATTCTGGG-  
-GTGAGCTCACTGGCTA-----TTAGTCTTCTTTTTTGAAGAACCCCATCAT  
TCCCCAAACTAGGTAGATTCTT-----GT  
TCAAGATAAATGGTAGGGTG-----ATCATACAAAC----TTCTGACAGTAAGAA-GC  
TGCCTTCTT-----CCCCACACCTCAA-----CCCTCAACCCA-----

-----TTATGTACACAG---AAAA  
CTAGC---AA-----C-----TTTTTT-----ATTGNAAAAATA  
GGGATAATAATAGCATAGTG-----TTTACTTCATAGGACTGNCATGAGGCTG-C TTANA  
T-GGTGTAATGTATGTAAAA----NCATTTAGCAAACCTGGT-----ATTATACA-----  
-TGTCCAGTGTATTGAGGGA---AACCAATGA-AA--GCT-AAAAAGGATTTTAAAGTC  
--AATTCAGCTA--ATTCTC-----AGGGCAGCTAGATGGCTCAGTG-----GA  
GGCCTGGAGTCAGGAAGACCTGAGTTAAAATC-----TGGTCTCAGACATTTATTAGCTG  
TGTC A-----TTTAACC-TCTCTTTGCCTAATCT-ACTGGAGAAGGAAATG  
GCAACCCATTCCACTATCTTTGCCAAGAAAACCC--TATGGAAGATATGGCCACAGAGT  
TGGACATCACTG-----AACACAAGGCTAATCCCCTCACTTA  
GAGAAAGACAGTA---AGT-CTT-----AGAAGAAAGAAAATC-----GATTTGT  
CCAAGGCTGCAGTGTCTGCCATACTGTGTTTTT-GGTATGAGCCTAGATATAGGGCCCT  
TGAGATAT--GTTAAAAG---GAATTTAAGC--ATCACCTTTTTTTGGGTAAATTTTT  
AGCAATTATGTTTTTGCTGAGTTGTTTATTGGTAGTTCA---TGTTAGACGTAACTCAT  
TTTTGTGACTC-----TTT-CATGGATTA-----GTGT-AAG  
TA-----TTATATTTATTCTTTCCAG--GATTTGGGA  
TGAATGGGAAATTTTCAACAATACATTTACTGGCATGTGGAT

>Ptr

CACAATGTCACACAGCATGAACAGACTTTCCGTTGGAATGCCTACAGTGGAAATTCTGGG-  
-GTGAGCTCACTGGCTA-----TTAGTCTTCTTTTTTGAAGAACCCCTATCAT  
TCCTCAAACCTAGGTAGATTCTT-----GT  
TCAAGTTAAATGGTAGGGTG-----ATCCTACAGACAACTTCTGACAGCAAGAA-GC  
TGCCTTCTT-----CTCCGCACCTCAA-----CCTTCAACTCA-----

-----TTTTGTACACAG---GAAA  
CTAGA---AA-----C-----TTTTTT-----AATCTGTAAAAACA  
GGGATAATGAGAGCATACTG-----CTTACTTCACAGGGCTGTCATGAGGCTG-C TTAGA  
T-GATGTAATGTGTGTAAAAA----CATGTAGCAAACCTTGT-----ATGATACA-----  
-TGTCCAGTGTACCAGGGGA---AACCAATGA-GA--GCT-AAAAGGGATTTTAAAGTC  
--AATTCAGCTA--ATTCTC-----TGGGCAGCTAGATGGCTCAGTG-----GA  
GGCCTGGAGTCAGGAAGACCTGAGTTAAAATC-----TGGTCTCAGGCATTTATTAGCTG  
TGTTACCTTCAGCAAGTCATTTAACC-TCTCTTTCCCTAATCT-GCTGGAGAAGGAAATG  
GCAACCCATTCCACTGTCTTTGCCAAGAAAACCC--TATGGACGATATGGCCACAGAGT  
TGGGCATCACTG-----AACAAANGGCTAATCCCCTCNCTT-  
ANANAAGACAGNG---AGT-CTA-----AAAAAATTGATTG-----







>Mnu

CTCAGAGAATGCAGCCATGGTACGGGAACAGAATGGCCATCGGTTACTGGTGGCCCTGGT  
TGGGGATAGCCTGCTTGAG--GTGAGTATGAAGGA-----

-----AAA  
GGGTATAATTTT-AGAGGAGGGGAGAAATGTAATAAT--GTTATCTGT-----C  
AAATGAGCCATAGCTGGACATTTT-TTAAATATGCCATT-----

-----GATAATGTCATGTTCTTTA  
--GTTCAATTTT-----CTCTTCTTCTTC--ACTTCCC-  
-----CCCACCCCAAAAAA--CTTTTATGTAG--CCTTTTTGGCCAATGGGAA  
CTGGAATAGCCCGAGGCTTTCTAGCTGCTATGGATTCAGCCTGGATGGT

>Rra

ATCAGAGAATGCAGCCCTGGTTCGAGAGCAGAATGGACACCAGCTATTGGTGGCCTTGGT  
TGGAGATAGCCTGCTTGAG--GTAAGTGTGAAGGAA-----

-----AAG  
GAGTGATATTTTTATAGGGGAGGAATTTTCATAC-----TATATCTGATATTAT-----G  
AAATGAGGCAT-AGGAGAGTTTTTATATTTTCATTGTTT-----

-----ATTATAACGAAACATCT-AGCAAAATGCCATTT-----  
-----CTTCCCTTTAAAACCTTATTTTACTTTTTTTCTCTCTT-----GCACTCCCTC  
CACACCCATACT--CTCCAAAAA--CTTTTATGTAG--CCTTTTTGGCCAATGGGAA  
CTGGAATAGCCCGAGGATTTCTGGCTGCCATGGACTCAGCCTGGATGGT

>Cfu

ATCAGAGAATGCAGCCCTGGTTCGAGAACAGAATGGACACCAGCTGTTGGTGGCCTTGGT  
TGGAGATAGCCTGCTTGAG--GTAAGTGTGAAGGAA-----

-----AAG  
GAGTGATATTTTTACAGGGGAGGAATTTTCATAC-----TTTATCTGATATTAT-----  
GTT--AGATATGAGGAGAGTTTTTATATTTTCATTGTTT-----

-----ATTATAACTAAACATCT-AGCAT-----  
-----CTTTCCTTT--AACTTATTTTACTTTTTTTCTCTCTT--GTGC--TCCCTC  
CACACCCACACT--CTCCAAAAA--CTTTTATGTAG--CCTTTTTGGCCAATGGGAA  
CTGGAATAGCCCGAGGATTTCTGGCTGCCATGGACTCAGCCTGGATGGT

>Dgl

ATCAGAGAATGCTGCCCTGGTTCGGGAACAGAACGGTCACCAGTTATTGGTGGCTCTGGT

TGGGGATAGCCTGCTTGAG--GTGAGTATGAAGGAA-----GTTCTTGTT-----  
--CAGTCGTGTCCAATACTTAA-----GTGG-----  
-----  
-----TTCCTTCTCCAGCTCATTTTA-----CAGATGAGAAAA-CTGAG  
GCAAACAGAGGTTAAGTGACTTGCCCA----GGGTCACACAGCTAATAA-----  
--GTATCTG-AGGCTGCATTTGAACTCA-----TTTTCCTGACTCTAG  
GCCTGGTGCTCTATCCACTACACC-ACCTAGCTGCCC-----AATATGAAGGAA--AGG  
GAATGATATCTT-ATAGGGGAGTTATGTATCTGATACTACAGAATGAGCCATA-----  
GTTAGAGATATGAGTGGAGTTTTTTATATATCATTGTTATTT-----  
-----  
-----ACTACAGCTAAACTTCT-AGCAGAATGCCGTGGTTTTTTT  
--GTTCTTTTTTCTCCCTTTAACTGATTTTAC----TTTCTCTCTT---CTGCACTTCCCC  
-----TACTG-ACCCCAAAAA--TCTTCTATGTAG--CCTTTTTTGNCGATGGGAA  
CCGGAATAGCCCGAGGCTTTCTGGCTGCTATGGACTCAGCCTGGNTGGT

>Nty

ATCAGAAAATGCAGCCCTAGTTCGGGAACAAAATGGTCATCAGTTATTGGTGGCCCTGGT  
TGGGGATAGCCTGCTTGAG--GTGAGTATGAAGGAA-----GTTGTTGTT-----  
--CATTTCCGTCTCAACTCTTCATGACTCCA--TTTGGGGTTGGTTGTTTTTTTTGTTTT  
TTGTTTTTTTTTTTTTTTTTTGGCAAAGATTTTGGCAAAGATTTGGCAAAAAATGGCAA  
GTTTGCCATTTCCCTTTTCTAGCTCATTTTA-----CAGTTGAAGAAA-CTGAG  
GCAAACAG-GGTTAAGTGACTTGCCCA----GGGTCACACAGCTAT-----  
--GTTTCTG-AGTCTGGATTTAACTCATGAAGATGAATCTCTTATTCTTG--GCCTG  
GC-----ACTCTATCCACTGTGCC-ATCTAGCTGCCC-----GAGTCTGAAGGAA--GAG  
GAATGATATTTT-ATAGGATGATAATGTATCTGATACTGTGAG-----ATGGCCATA  
GTTAGAGATATGAGTGGAGTTTTTTATATGTCA--TATATTT-----  
-----  
-----ACTATAGCTAAACTTCC-AGCAGAATGTAATGCTTTTTTT  
-----GTTTTCCCTTTTTAACTTATTTTAC----TTTCTCTTTTTTCTCTATTTCCC  
TCACCCCATACTC-ACCCAAAAA--CCTTCTATACAG--CCTTTTTGGCCAATGGGAA  
CTGGAATAGCCCGAGGCTTTCTGGCTGCTATGGACTCAGCTTGGATGGT

>Pta

ATCAGAGAATGCAGCCCTGGTTCGGGAACAGAACGGCCATCAGTTATTGGTGGCCCTGGT  
TGGGGATAGCCTACTTGAG--GTAAGCCTGAAGGAA-----ATTGATGTT-----  
---TATTATGTCTAAT-----GACCTCA--TCTTTTTTC-----  
-----TTTCTTTTTTTTTTATG-----  
---GCTATTTCCCTTCTTCAGCTCATTTTA-----CAGATGA-GAAA-CTGAG  
GCAAATAG-GCTTAAGTGATTTGCTCA----GAATTAAAT-----  
-----GATTTTACTTGAAG---ATGAATCTTTTTTATTCTAA--GCTTG  
GCACTCTGTTCACTTAACTGCATC-----ATTATGAAGGAA--GGG  
GAATAACATTTT-ATAGGGCATACTATAGAATGA-GCCATA-----  
-----GTTATTCATAGATACGTATAGCTATATA-GTTAGATC-ATAG  
TTAGAGATATGAAGTTTTTTATTTATCA-----  
-----  
-----TAATAGCTAAATTTGCCAACAAAATGTCATGGGTTTTTT  
-GGTTCATTTTCCCTTTTTAACTTATTTTCC----TTTCTCTTTTTTCTGTATTTT-GC  
TCACCCCTCTACT-CGCCCAAAAA--CCTTTTATGCAG--CCTTTTTGGCCAATGGGAA  
CTGGAATAGCCCGAGGCTTTCTAGCTGCTATGGACTCAGCCTGGATGGT

>Dgo

ATCAGAGAATGCAGCCCTGGTTCGGGAAAGAACGGCCATCGGTTATTGGTGGCTCTGGT  
TGGGGATAGCCTACTTGAG--GTAAGCCTGAAGGAA-----ATTGATGTT-----  
---TATCAGGTCTAAT-----GACCTCA--TCTGTGATCTTTTTTT-----

-----TT-----  
-----TTTT-----GCTATGA-GAAA-CTGAG  
CCAAATAG-ACTTAAGTGAATTGCTCA---GAGTCAAATAGCTATTAA-----  
--GTGTGTG-AGCATGGATTTTACTTGACG---ATGAATCTTTTTTCATTTTAT----AG  
GG----TATACTATAGAATGAGCC-ATA-----GTTATTCATAGA-----  
-----TATGT-ATAGCTATATAGTTAGA-----TCCATAGTTAGAGATAAGAA-----  
-----GTTTTTATTTATCATAATA-----  
-----

-----GCTAAATTTCTT-----  
--GTCCATTTTCCCTTTTTAACTTATTTTCC---TTTCTCTTTTTTCTGTACTTT-GC  
TCACCCCCTACT-TGCCCAAAAAA---CCTTTTATACAG--CCTTTTTGGCCAATGGGAA  
CTGGAATAGCCCGAGGATTTCTAGCTGCTATGGACTCAGCCTGGANGGT

>Scr

ATCAGAGAATGCAGCCCTGGTTCGGGAACAGAACGGCCATCAGTTATTGGTGGCCCTGGT  
TGGGGATAGCCTACTTGAG--GTAAGCCTGAAGGAA----ATTGATGTT-----  
---TAGTGTGTCTAAT-----GACCCA--TTGTGATC-----

-----TTTCTTTTTA-----

TTTGGCTATTTCCCTTCTTCAGCTCATTTTA-----CAGATGA-GAAA-CTAAG  
GCAAATAA-GCTTAGGTGAATTGCTCA---GAGTCAAAAAGCTATTAAATGTCTTAATA  
AAGTGTCTTAAGGCTGGATTTTAATTGAAA--ATGAATCTTTTTTATTCTAA--GCCTG  
GA-----ACTCTTAAGTCTC-----ACTATGAAGGAA--GGA  
GAATTGCATTTT-ATAGCATATACTATAGAATGA-----

-----TATATATAGTTTTTTATTTATCATGTATAGCTATATA-GTTAGATCCATAG  
TTGGAGATGTGAAGTTTTTACTTACTTACTT---ACTTACTTATTTATTTATCATAATA  
GCTAAAATTTATTTTATTATAAATAATTATAAATTATTATTTTAAAATTTATTTTATTGT  
AATAGCTAAATTTATTTATTATAAATAGCTAAATTTG-AAGCAGAATGTCATGCTTTTTT  
--GTTCAATTTTCCCTTTTTAACTTATTTTAC---TTTCTCTTTTTTCTGTACTTT-GC  
TCACCCCCTACT-CACCAAAAAAAA-CCTTTTATGCAG--CCTTTTTGGCCAATGGGAA  
CTGGAATAGCCCGAGGCTTTCTAGCTGCTATGGACTCAGCCTGGATGGT

>Mfa

ATCAGAGAATGCAGCCCTGGTTCGGGAACAGAACGGCCATCAGTTATTGGTGGCCCTGGT  
CGGGGATAGCCTACTTGAG--GTAAGTCTGAAGGAA----ATTGATGTT-----  
---CATCATGTTTTAT-----GACCACA--AATTTTATC-----

-----TTATGGCAAAGATAT-GAG-----AGCA-

GTTTGCCATTTCCCTCTCCAGCTTATTTTA-----CAGATGA-GAAA-CTGAG

-----TGACTTGCTCA---GAGTCAAATAGCTATTAA-----

--GTGTCTG-AGACTGGATTTGAAGTGAATGAATCTTTT-GATTCTAA--GCCTG

GAACTCTCTTCATTTGCCACTTAGCTACCTC-----ACTATGAAGGAA--AGG

GAATGACATTTT-ATAGGGTATACTATAGCATGA-GCCATAAGTAGAGATA-----

-----TGAATAAAGTTTTTTATTTATCATGTATAGCTATAAATAGTTAGATCCATAG

TTAGAGATATGAAATTTTTTATTTATCACA-----

-----

-----TATAGCTAAACTTCC-AGCAGAATGTCATGCTTTTTT

-GGTTCATTTTCCCTTTTTAACTTATTTTAC---TTTCTCTTTTTTCTGTACTTT-GC

TCACTCCCTATT-CACCAAAAAAAA---CCTTTTATGCAG--CCTTTTTGGCCAATGGGAA

CTGGAATAGCCCGAGGCTTTCTAGCTGCTATGGACTCAGCCTGGATGGT

>Bil

ATCAGAAAATGCAGCCCTGGTTCGGGAACAGAATGGTTCATCAGTTATTGGTGGCTTTGGT

TGGGGATAGCTTACTTGAG--GTGAGTATGAAGGAA----TTTGTTGTT----CAGTTG

AACAACAAGTGTCCATCTCT-----

-----TTTGACAAAGATATTGAG-----AG

GTCTCCCATTTCTTTTTTTCAGCTCATTTTCAGCTCATTCAGCTCAGATGAAGAACTTGAG

TTAAACAG-TGTTAAGTGATTTATTTACCTACAGTCATAGAAGTACTAGTGTA-----  
--GTTTCTT-AGGCCAGATTTT-ACCCTTGAAGATGAGACCTATCTACTGTAC-----  
-----CCCTACTGCCT-----GAGTGTGAAGTAA--GGG  
GAATGATATTTT-ATAGGAGAGTAATTTATGTGATACTATAGAATGACATA-----  
-----TGAGTAA-GTTTTTACTTGTTCATGTGTC-----

-----ACTT---AACAGAATGTCATGCTTTTTTC  
--ATTCATTTTCTCTTTTTAACTTATTTTATC-TTTCTCTCTCTTTTCTGCACTTC-CC  
CCATCCGTTACT-TACTCCCCTAAAAA-CTTTTTTGCAG--CCTTTTTGGCCAATGGGAA  
CTGGAATAGCCCGAGGCTTTCTGGCTGCTATGGATTCAGCCTGGATGGT

>Pgu

ATCAGAAAATGCAGCCCTTGTTTCGGGAACAGCATGGTCATCAGTTANTGGTGGCTTTGGT  
TGGGGATAGCTTGCTTGAG--GTGAGTATGAAGGAA----TTTGTGTGTT-----  
---CAATTGTGTCCAACCTCTTCTAGGCAAAG--ATATT-----  
-----G-----GGAG  
GGTTCCCATTTCTTTTTTCAGCTCATTTTA-----CAGATGA-GAAA-TTGAG  
TTAAACAG-GGTTAAGTGT-----  
--GTTTCTT-AGGCCAGATTTG-ACCCATGAAGATGAGACCTATCCACTATAC-----  
-----CCCCAAGTGCCT-----GAGTGTGAAGGA-----  
---GAATATTTT-ATAGGAGAGTAATTTATCTGATACTATAGAATAAGATA-----  
-----TGAGTAA-GTTTTTATATATCATGTATC-----

-----ACTG---AACAGAATGTCATGCTTTTTTC  
--ATTCATTTTCTCTTTTTAACTTATTTTATC---TTTCTC--TTTTTCTGCACTTC-CC  
ACATTCCTTAC-----CCTTCTTTGCAG--CCTTTTTGGCCAATGGGAA  
CTGGAATAGCCCGAGGCTTTCTGGCTGCTATGGATTCAGCCTGGATGGT

>Iso

ATCAGAAAATGCAGCCCTTGTTTCGGGAACAGCATGGTCATCAGTTATTGGTGGCTTTGGT  
TGGGGATAGCTTGCTTGAG--GTGAGTATGAAGGAA----TTTGTGTGTT-----  
---CAATTGTGTCCAACCTCTTCTA-----  
-----GGCAAAGATATTGCG-----AG  
GTTTCCCATTTCTTTTTTCAGCTCATTTTA-----CAGATGAAGAAA-TTGAG  
TTAAACAG-GGTTAAGTGT-----  
--GTTTCTT-AGGCCAGATTTG-ACCCATGAAGATGAGACCTATCCACTATAC-----  
-----CCCCAAGTGCCT-----GAGTGTGAAGGA-----  
---GAATATTTT-ATAGGAGAGTAATTTATCTGATACTATAGAATGAGATA-----  
-----TGAGTAA-GTTTTTATATATCATG-TATCAC-----

-----TGAACAGAATGTCATGCTTTTTTC  
--ATTCATTTTCTCTTTTTAACTTATTTTATC---TTTCTC-TTTTTTCTGCACTTC-CC  
ACATTCCTTAC-----CCTTCTTTGCAG--CCTTTTTGGCCAATGGGAA  
CTGGAATAGCCCGAGGCTTTCTGGCTGCTATGGATTCAGCCTGGATGGT

>Tro

ATCAGAGAATGCAGCCCTGGTCCGGGAACAGAATGGGCATCAGTTACTGGTGGCCCTGGT  
TGGGGATAGCCTGCTTGAG--GTGAGTACGAAGGAA-----  
-----ACTACTCGTGACCCCGTTTTTGGGTTCT-----  
-----TCTTGGCAGAGGTATCAG-----GGTG  
GTTTGCCATTTCTTCTCCAGCTCATTTTA-----CAGATGAAGAAA-TTGAG  
ACAAACAG-GGTTAAGTAATTTGCCA---GCGTCACACAGCTATAAGTAA-----  
--GTGTCTG-AGGCCAGATTTGAACTCAGGAAGCTGAACCTTCTGATTCTAG-GCCAGG

CATTTTATCCACTGGGCC-----ACCTAGCTGCCC----AAGTATGAAGAAA--GGG  
AATTGATGTTTT-ATAGGGGAGTAATGTGCCTGATACTACAGAATGAGCTATCGTTAG--  
---AGATAGGAGTGAAATTTTAAATATATCA--TATTCAC-----

-----TATAACTAAAACCTTACAGCAGAACGTCATGCTTCTTC  
--ATTCCTTTTACCTTTTTAACTTATTTTACT-TTTTTCTCTCATTTTCTGCACTTC-CC  
C-ACCCTCACCTC-CCTCCCCAAAA-CCTTTTATGCAG--CCTTTTTGGCCAATGGGAA  
CTGGAATAGCCCGCGGTTTTCTGGCTGCTATGGACTCAGCCTGGATGGT

>Ppe

ATCGGAGAATGCAGCCCTGGTTCGGGAACAGAATGGTCACCAGTTATTGGTGGCCCTGGT  
TGGGGACAGCCTGCTTGAG--GTGAGTGTGAAGGAA----GCTGTTGTT-----  
---CAGTCATACCCAATTCTTCGTGACCCCA--TTTG-----

-----G  
GTTTGCCATTTTCGTTCTCCAGCTCATTTTA-----CAGATGAAGAAA-CTGCC  
CCAAACAG-GATTAAGTAACTTGCCCA----GAGTCACACAGCAATA-----  
--GTGTCTG-AGGCCAGATTTGAACTCAGGAAGATGAATCTTCCTGATTCTAG-GTTCAG  
TATTCTATCCACTGCACC-----ACCTAGNTGACC----AAGTATGAAGGAA--AGG  
GAATGATATTTT-ATAGGGGAGTAATGTATCTGATACTACAGAATGAACCATAGTTAA--  
---AGTTATGAGTGGA-GTTTTATTATATCG--TATTTAC-----

-----TATAGCTAAA-CTTCCAGCAGAACATCATGCTTTTTTT  
--GTTTATTTTACCCTCTTAACTTATTTTACTTTTTTTCTCTCTTTTTTCTGCACTTC-CC  
CCACCCCTCCTT-ACCCACAAAA--CCTTTTATGCAG--CCTTTTTGGCCGATGGGAA  
CTGGAATAGCCCGAGGCTTTCTGGCTGCTATGGACTCAGCCTGGATGGT

>Mr0

ATCAGAGAATGCAGCCCTGGTTCGAGAACAGAATGGTCACCAGTTATTGGTGGCCCTGGT  
GGGGGATAGCCTGCTTGAG--GTGAGTATAAAGGAA----ATTGTTTCAGT-----  
---CACG---TCCAACCTCTTCGTGACCCCA--TTTGGGGTT-----

-----TTCT---TGGTAAAGAGG-----TATG  
GATTGCCATTTCTTCTCCAGCTCATTTTA-----CAGATGAAGAAA-CTGAG  
GCAAACAG-GGTTGAGTGACTTGCCCA-----  
--GTGTTTG-AGGCTAGATTTGAACTCATGAAGATGAATCTTCCTGAATCTAG-GCTCAG  
CATTCTATCTACTGTGCC-----ACTTAGCTGCCC----GAGTATGAAGCAA--GGA  
GATTGATATTTT-ATAGGGGAGTATTGTATCAG-----ATAGTTAG--  
-----ATATGAGTGGA-GTTTTGATATATCATATATTTAC-----

-----TATAGCTAAA-CTTCTAGCAGAATGTCATGTTTTTTC-  
--ATTCATTTTTCCCTTTTTAACTTATTTTACCTT-----CTTTTTCTACACTTC-GC  
CCATCCCCTCCTC-ACCCCAAAAAA-TTTTTATACAG--CCTTTTTGGCCGATGGGAA  
CTGGAATAGCCCGAGGCTTTCTTGCTGCTATGGACTCAGCCTGGATGGT

>Vur

ATCAGAGAATGCAGCCCTGGTTCGGGAACAGAATGGTCATCAGTTATTGGTGGCCCTGGT  
TGGGGATAGTCTGCTTGAG--GTGAGTATGAAAGAA----GTCGTTGTT-----  
---CAGTGGTGTCCAACCTCTTTGTGACCACA--TTTGGGGTT-----

-----TTCC---TGCGAAGAGG-----AGTG  
GTTTGCCATTTCTTCTCCAGCTCATTTTA-----CAGAGAAAGAAA-CCGAG  
GCAAACAG-GGTTAAGCGACATGCCCA----GGCTCACACAACT--AGTAA-----  
--GTGTCTG-AAGCCGATTTGAACTCATGAAGATGAATCTTCCTGATTCCAG-GCCCAG  
TGTTCTATCCACTGCACC-----ACT-GGCTGCCC----GAGTATGAAAGAA--GGG  
GAATGATATTTT-ATAGGGGAGTAATGCATCTGATACTACAGAATGAGCCATAGTTAG--

----AGATATGAGCGGA-GTTTTTATTTATCATATATTTAC-----  
-----  
-----TCTAGCTAAA-CTTCCAGCAGAATGTCATGCTTTTTC  
--ATTCATGTTTCCCTTTTAACTTATTTTACTTT---CTTTCTCTTTCTGCACTTC-CC  
CCACCCCCTCTTC-ACCCTCAAAAAA--CTTTTACGCAG--CCCTTTTGGCCGATGGGAA  
CTGGAATAGCCCGCGGCTTTCTGGCTGCTATGGACTCAGCCTGGATGGT





TTCTTGAGTCAAATTCTCCCCATTACTTAGGCTATGGGAGATACTCATACCCTG-----  
-----TTTCTCTTTTCCCAATCCCCTGTCTCCCACCC-CCACTTCCACACT  
GACCTTCCAATCACCTTCCCCACTACATCCCTGTTCTTATTGCATTCTGTC-----  
-----CCCTCTCCACTTCCCTCCTGTTCTCCTCTCTCTCTCTGTGCCCC--  
-----ACCTAG--GAGACGGGAAGGTATCCAGCCTACAAGGAGATGGTGTCTGAATA  
CTGCT

>Mnu

ACCACATCAGTCACAGCCAGGCTGTGGAAGTGCTGAAGGGGCAGACGCACATCATGCTGA  
CCATTAAG--GTAAGCCAGGGACCACAGGGTCGTCGT---GGAGCCCAGGACCCAGGGA  
TGGA---GCAGAAATGGAAGG-----AAGACAGACTAC  
AGGGAAAGCTTCCATAAAGT-----AGCAAGCACTATA-AAAGGCAGCCACTTCATCA  
GAGAGCCTGAGCCCTGGTCTCTCAGGGAAAGGATGAACCTGAAGCTCATAGTGGCAGGG  
AGGAA-----CAGGATGACTTCTGGAGGGAGCTAGGCTTGGGATCAAGGTGGGCAGAGAC  
-CAGGA-TCACTCCCTGGGGCCATCATGTGGGCAATGAGAACAAGAAGAGACTGTAGGCC  
T---CCTGGGCGTGATTT-----

-----CAA  
GGTTCAACGAGG-----GAGAGAGTGGAA--TCATTAATCAG  
TTCTTGAGTCAAATTCTCCCCATTACTTAGGCTATGGGAGATACTCATACCCTG-----  
-----TTTCTCTTTTCCCAATCCCCTGTCTCCCACCC-CCACTTCCACACT  
T---CCACACTGACCTTCCAATCACCTTCCCC-----ACTACATCCCTGTTCTTATT  
GCATTCTGTCCCTCTCCACTTCCCTCCTGTTCTTCTCTCTCTCTCTGTGCCCC--  
-----ACCTAG--GAGACGGGAAGGTATCCAGCCTACAAGGAGATGGTGTCTGAATA  
CTGCT

>Cfu

ACCACATCAGTCATAGCCAGGCTGTGGAGGTGCTGAAGGGCCAGACCCACATCATGCTGA  
CCATCAAG--GTAGATCCCTGAACACAGGCTTATTATCATAGACCCAGAGGACCCCTGGGA  
TGGAAG---GCAGAAATGGTAGCTA---CTATGTTGGGAGGGATAGAAGTCAGACTTGC  
AGGAAAAACTTTCTGAAAG-----AGTAAGCACTAGA-AAAGGCAGCCTGTTTTATCA  
GAGAGAATGAGCCCTGGTTTCTCAGTGGAAGAAGGGACCCGTAGTGTCTCAGAAAGATAA  
GAATG-----ACTCCTGAGAAGAGCTAGGCTTGGGGTCAAGAAGAGCAGAGAC  
-AGGGA-TAATTCTCTAGGGTCATTAAATA-----CAGAAGAAGCAA---TAGG--  
---TCTTGATTTGATTT-----

-----AAAA  
GAATCATCCAGAAGAAAAAAAAAAGAATCATCCAGGGATGGAGTAGGATTCATTAACCAG  
CTCTTGGGCTATATGTTCCCCATTGCTTATGATAGAGGAGAG-----ACCCTGTTTCCA  
TT-CCTACCCCATTTCTCAGTTCCCCAGTCACCCATTCCCCATCC-CCATTCCACACT  
GATTCTCCAATCTCCTTCCCATCTACTTCCCCATC--TAATGCATTCTATTC-----  
-----ATCCCCCCTTTCCTTCTCGTCCCCTCCCCACC-----  
-----A-CTAG--GAGACAGGAAGGTATCCGGCCTACAAGGAGATGGTGTCTGAGTA  
TTGCT

>Dgl

ACCACATCAGTCACAGCCAGGCTGTGGAGGTGCTGAAGGGCCAGACGCACATCATGCTGA  
CCATAAAG--GTAGACCACTCGCCACAGGCTTGT-----AGACCTATAGGACCCCTGGGG  
TGGAAGGAAGGCAGAAATGGCAGCTGCGACTAGGTTGGGAGGGATAGAAGTCAAAC-TGT  
AGGAAGAACTTTCTAAAAGGAGCCAATGTAAGCACTAAA-CAAGGCAGCCAACCTTTCTCA  
AAGAG--CAAGTTCTAGTTTCTCAGAGCAAGGAGGGACTCTGTAGCTCAGCAGTGGGGAG  
GAA-----GAGCATGATTTCTAGAGAGAGCCGGGTTTGAATTAAGGAGGAGATTACT  
CTTGGG-----GTCCATTATAAGGGCAACAAAAGGAAGAAGGGGCTGTTGGCC  
T---TCTAGATTTGATTT-----

-----  
-----  
-----TAAG  
GGATCACCCAGGG-----AGGGAG---TGGGA--TCACTAACCAT  
TTGTTGGGTCATATTCTCCCTGTTGCCTAAGATATGGGAGATATTCATACCCTCTTCCCA  
CC-CCCATCCTCTTTTCTCAATTCCATAATCGATTGTCCTCCACCC-CCATTCTACACT  
TATCCTCCAGTCTCCTTCCCATCATCATCCCC-----TAATGCAGCTCATTCTCCCTCT  
CC-----ATTCCCCTCCCCTTTCTCCTCTCCCTTCTCCCCTTCTCC---  
-----ATCCAG--GAGACTGGAAGGTATCCAGCCTACAAGGAGATGGTGTCTGAGTA  
TTGCT

>Nty

ACCACATCAGTCACAGCCAGGCTGTAGAGGTGCTGAAGGGCCAAACGCACATAATGCTGA  
CCATAAAG--GTAGGCTGCTGACTGCAGAATTGTCAT---GGGCCATAGAACCCTGGGA  
TAGAAG---GCGAAATTGGTAGTTA---CTAGGTCAGGA-AGAATAAAAGTCAGACTGT  
AGGAAGAACTTTCTAAAAGTAGCAAGGGTAAGCACTAAA-CAAGGCAGCTGACTTTATCA  
GAGATAGCAAGCCCTAGCATCTCAGTGGAAAGACTCAGAGTG-----GTAGGGAG  
GAA-----CAGGATAAATTCTAGACAGAGCTAGGCCTGGGGTCAAGGAG---ATTACT  
GCGTGG-GGCCATCATATGGGCAATGAAA-----GGAAGAAGAGACTGAAGGTC  
T---TCTAGATTTGA-----TTTGTGGGGGTGGGGAGCCCA-----  
-----GGGTCACACAAGTATATATCTTAGGCCA---GATTTGACCTTA  
GGCATTCTGACTTCCAGGCCCGGTGCTCTATCCATTGTGCCACCTACCTNCCCCT----  
TCTACATTTGATTT-----  
-----TANAAA--TCATTANCCAG  
TTCGTGAGTCNCATN--CCCTGTTGCTTAANANATG-----AAACTCAACCCTTTTCCCC  
ACTTCTTATCCCATTCTCAATTTTCCAATTCCTGTTCCCCATTC-CCATTCCCACACT  
GATCTTCTATCTCCTTCCCATCCCCAACCC-----AAATGTGTTCTCTC-----  
-----TCCCTCTCCATTCTCTTCACTTCTCTCTC-----  
-----CCACAG--GAGACAGGAAGGTATCCAGCCTACAAGGAGATGGTATCTGAGTA  
CTGCT

>Dgo

ACCACATTAGTCACAGTCAAGCTGTGGAGGTGCTGAAGGGTCAGACACACATCATGCTGA  
CCATCAAG--GTAGGCCATTGACTGTAGAGTTGTTAC---AGACCCATCAGACTCTGGGA  
TGGAA---GGATAAA-----AGTTAGA-----CT-GC  
AGAAAGAATTTTCTAAGAGTAGCAAGTGTAAGCATTAAA-CAAGGCAGCTGGCTTTATCA  
G-----CAAGCCCTGG---CTCTAT-----AACTCAGAGTAATGGGG  
GAACA-----CAGGTTGACTTCTGGAGAGAGCTAGGCCCAGGGTCAAGGAA---TTAGT  
CTCTGTTGACCATTATATAGACAATGAAA-----GGAAGAAGAGGCAGGAGGCC  
T---TTTTTTTTTTTTTT-----TTTTGAGAGGAAGA-AGTTAA  
-ATAACATGTCCTGCGTCACATAGCTAGT-AAATATTTGAAGGTG---GATTTGAACACA  
G-GTCCTCCTGACTCCAAAAGTGGTGTCTGTCCACTGTGCTAACTAACTGCCTCT----  
TCTAGATTTTATTT-----TAAG  
GGATCAACCAGG-----GAGAG--ATTGGGA--TCATTAATCAG  
CTCTTGGGTCATATTTTCCCATTGTTTAAACTATGTAAGATAATCATACCCTTACCTCC  
-----ATGTCTCAATTCCCAATTCTCTGTTCCC-ATCC-CAATCTCCATAAT  
---TCCCATTCCCATTCC-----CACTGCATCCCTTTCTCCCTTT  
CCATT---CCTCTCCAATTCTCTTCTCCTTTCTTCCCTTCTCTCCTTCC-----  
-----CCTCAG--GAAACAGGAAGATATCCAGCCTATAAGGAGATGGTGTCTGAGTA  
TTGCT

>Scr

ATCACATTAGTCACAGCCAAGCAGTGGAGGTGCTGAAGGGTCAGACACACATCATGCTGA  
CCATCAAG--GTAGGCCACTGACAATAGGGTTGTTAC---AGACCCATTGGACTCTGGGA  
TGGAA---GGATAAA-----AGTCAGA-----CT-GC  
AGAAAGAACTTTCTAAGAGTAGCAAATCTAAACACTAAAACAAGGCAGCTGGCTTTATCA

G-----CAAGCCCTGG---CTCTAT-----AACTCAGAGTAATGGGG  
GAACA-----CAAGGTGACTTCTGTAGAGAGCTAGGCCCAGGCTCAAGGAA----TTAGC  
CTCTGT-GACTATTATATAGACAATGAAA-----GGAAGACGCAGT--AGGCC  
T---TCTTGATTTGATTT-----TTTTTTTGTGGGGGGGAGGA-AGTTAA  
-----CATCTCCTGGGTCACACAGCTAGT-AA-TATTTGAGGGTG--GATTTGAACACA  
G-GTCCTCCTGATTCCAAAGC-TGTGTTCTATCCACTGTACTACCTAACTGCCTCT----  
TCTAGATTTTATTT-----TAAG  
GGATCAACCAGG-----GAGAG--ATTGGGA--TAATTAACCAG  
TTCTTGGGTGATATTTTTCATATTGTTTAAAATATGGAANATAATCATACCCTTACCTCC  
-----ATGTCTCAATTCTTCAATTCTCTGTTCCC-ATCC-CAATCTCCATACT  
----TCCCATTTCCCTTCC-----TACTGCATTTCTTTTTCCCTTTT  
CC-----ATTCCTCTTCTCTTTTCTTCCCTCCCTTCTCCCCCTTC-----  
-----CTTCAG--GAAACGGGAAGGTATCCAGCCTATAAGGAAATGGTGTCTGAGTA  
CTGCT

>Mfa

ACCACATTAGTCATAGCCAAGCTGTGGAGGTGCTGAAGGGTCAGACACACATCATGCTGA  
CCATCAAG--GTAGGCCACTGACCATAGGGTTGTCAT---AGACTCATCCGACTCTGGGA  
TGGAA---GGATAAA-----AGTCAGAA-----TGC  
AGAAAGAACTTTCTAAGAGTAGCAAGTGTAAGCACTAAA-CAAGGCAGCTGGCTTTGTCA  
G-----CAAGCCCTGGTTTCTCTGTGGAAGGAAGGGCTCTATAACTCAGA-----  
-GACA-----CAGGGTGACTTCTGGAGAGAGCTAGGCCCAGGATCAAGGAA----TTAGC  
CCCTGT-GACCATTATATAGTCAATGAAA-----GGAAGAGGAGGCAGGAGGCC  
T---TCTTGATTTGATT-----GGGTTTTTGGGGGGAGTGA-AGTTAA  
-ATAATATGTCCCAGGTCACACAGCTAGT-AAATAGCTGGGTTTG--GATTTGAACACA  
G-GTCCTCCTGACTCCAAAGCTGGTGTCTATCCACTGTGCCACTTAACTGCCTCT----  
TCTAGATTTTATTT-----TAAA  
GGATTAACCAGG-----GAGAG--ATTGGGA--TCATTAACCAG  
TTCTTGGGTCATATTTTCCCCATTGTTTAAAATATGGGAGGTAATCATACCCTTACCTCC  
-----ATGTCTCAGTTCCTCAATTCTCTGTTCCC-ATCC-TGATTTCCATACT  
----TCCCATTCCCATTCC-----TACTGCATTTCTCTCCCTTT  
CCATT---CCTCTCCCAATTCCTCTTCTTTCTTCCCTTTTCTCCTCTTCCC-----  
-----TCTCAG--GAAACAGGAAGGTATCCAGCCTATAAGGAGATGGTGTCTGANTA  
CTGCT

>Bil

ACCACATCAGTCATAGCCAAGCCGTGGAGGTGCTAAAGGGCCAGACACATATCATGCTGA  
CCATAAAG--GTAGGCCACTGCCACAGGGTTGTCAT---AGACCC-----TGGGA  
TGGAA-----AATAAA-----AATGGTAGCTACTAGGTTGGG  
ATGTATAAAAGTCAGACTGTAGGCAGAGTAAGCACTAAA-CAAGATAGCCTACTTTATCA  
GAGAGAGCAAGCCCTGGTTTCCCAGTGGAAAGGAGAACTCTGTAGCCGAGTGGTGAGGAG  
AAACA-----GGATGAGTTCTGGAGAGAGGTAGACCTGGGATCAAGGAGGAGATTACT  
CTCTGG-GGCCTTTTTTTGGGCAATGAAA-----GGAGGAAGTGGCTCTTGGCC  
T---TCTAGGCTTTATGT---ATCTATCTATCTATTTATTTATTTTTTGTGAGGGGG---  
-----AAACCCCAAGTCACACACCTA-----  
--GTCCTCCTGACTCCAAAGTTGGTGTCTATCCACTTTGTTATCTAGTTGCCTCT----  
TTTAGGTTGGATTC--TATTTTAAATTTTAAATTTTTTCCAATTGGGTTTGATTTAAA  
GGTTCAACCAGG-----GAGGGAATGTGGGA--TCATTAACCAG  
TTCTTGGGTCATATTCTCCCCTTTGCTTAGGATATGAGAGGTAATCATACCCTGTTCCCA  
C--CCTATTCTCTTTCTCAATTCCCAATGTCC-TTTCCCTCCCCTCTATCCCACACT  
-----ATTTTTTA-----TAATGCATTCC-----  
-----TCCCTCTCTATTCTCTCTCTTCCCTCCCCTCCC-----  
-----ACTCAG--GAGACAGGAAGGTATCCAGCCTACAAGGAGATGGTGTCTGAGTA  
TTGCT

>Pgu

ACCACATCAGTCATAGCCAGGCTGTGGAGGTGCTAAAGGGCCAGACACACATCATGCTGA  
CCATAAAG--GTAGGTCACTGCCATA-GGTTCTCAT---AGACCC-TAAGATCCTGGGA  
A-----GTATAAA-----AGTCAGACTGT  
GAGCAGAAGCTTTCTAAAAGTAGCAAGTGTAAGCCCTAAA-CAAGAAAGAT-----  
-----CAAGCCTTGATTTCCCAGTGGAAAGAAGAACTCTGTAGCTCAGACTAGTGAGG  
AAGAG-----CAGGAAGACTTCTGGAGAGAGGCAGACCTGGTATCAAGGAGGAGATTACT  
CTGTGG-GACCATTTTATGGGCAATGAAA-----GGAAGAAGAGGCTGTGTGCC  
T---TCTAGCTTTTATTT-----ATTTATTTAGCT-----AGTTAA  
TTTT-----AGTCACACACCAA-----  
--GTCCTCCTGATTCCAGAATTGGTGTCTATCCACTTTATTAGCTAGTTGCCTCT----  
TTTAGGTTGGATTC---TATTTTAA-----TTTTTTTCCAGTTGGATTTGATTTAAA  
GGATCAATCAGG-----GAGGGAGTGTGGGA--TCATTAACCAG  
TTCTTGGGTTCATATTCTCCCCTTTGCTTAGGATATGAGAGATACTCATAACCCTGTTCCCA  
C--CCTATTCCCCTTTCTTGATTCCCTAATCCC-TTTCCCTCCCTTCTATTCCCATACT  
ATTCCCACATCATTTTTTA-----TAATGCATTCCCTCCC-----  
-----TCCCTCTCCATTCCCTCTCCTCTTCCCTCCCCTTCC-----  
-----ACTCAG--GAGACAGGAAGGTATCCAGCCTACAAGGAGATGGTGTCTGAATA  
TTGCT

>Iso

ACCACATCAGTCATAGCCAGGCTGTGGAGGTGCTAAAGGGCCAGACACACATCATGCTCA  
CCATAAAG--GTAAGTCACTGCCACA-GGTTCTCAT---AGACCC-TGAGATCCTGGGA  
A-----GTATAAA-----AGACTGT  
GAGCAGAAGCTTTCTAAAAGTAGCAAGTGTAAGCCCTAAA-CAAGAAAGAT-----  
-----CAAGCCCTGGTTTCCCAGTGGAAAGAAGAACTCTGTAGCTCAGACTAGTGAGG  
AAGAG-----CAGGAAGACTTCTGGAGAGAGGCAGACCTGGGATCAAGGAG---ATTAGT  
CTGTGG-GGCCATTTTATGGGCCATGAAA-----GGAAGAGGCTGTGGGCC  
T---TCTAGCTTTTATTT-----ATTTATTTAGCT-----AGTTAA  
TTTTAG-TC-----ACACACCAA-----  
--GTCCTCCTGATTCCAGAATTGGTGTCTATACACTTTGTTAGCTAGTTACCTCT----  
TTTAGGTTGGATTC---TATTTTAA-----TTTTTTTCCAGTTGGATTTGATTTAAA  
GGATCAATCAGG-----GAGGGAGTGTGGGA--TCATTAACCAG  
TTCTTGGGTTCATATTCTCCCCTTTGCTTAGGATATGAGAGATACTCATAACCCTGTTCCCA  
C--CCTATTCCCCTTTCTTGATTCCCTAAT-CCC-TTTCCCTCCCTTCTATTCCCATACT  
ATTCCCACATCATTTTTTA-----TAATGCATTCCCTCTCCTCTTCC  
TCCCCTTCC-----  
-----ACTCAG--GAGACAGGAAGGTATCCAGCCTACAAGGAGATGGTATCTGAATA  
TTGTT

>Tro

ACCACATCAGTCACAGCCAGGCTGTGGAGGTACTGAAGGGCCAGACGCACATCATGCTGA  
CCATAAAG--GTAGGCCCTGACCACAA-GGCTGTCCT---AGAACA--AGG-CCCTGGGA  
TGGA---GCAGAAA-----TGGCATCTATTAGATTAGAAA  
GAATAGAAGCTTTCTGAAAGCAGCAAGTGTAAGAACCACA-AAAGGCAGCGGACTTTATCG  
GAGAGAAGCAGCCCTGGTTTTTTCGGTGGAAAGGAGGGCTCTGTATCTCAGAGTGGTGCCA  
GGAAC-----CAT-ATGACTTCTGG--AGAACTAAGCCTGGGGTCAAGAAGGAGAGTGCT  
CCCTAG-GGCCATTATATGGGCAGTAAA-----GGAGTAGGAGGCAGGAAGTC  
T---TCTAGATTTGATTT-----GGGAGTGGGAGGGTAGGAAGAAGCAATTGG-AGTTAA  
-GTGACCTACCCT-GGTCACAAAAGTGGTACGTGTCTGACTGAGAACAGATTTGAA----  
-----CTCCTGACTCCAGAGCCAGTGTCTA-CCACAATG-----TCCT----  
TCTAGACTTTGATTT-----TGAG  
AGATCAGCCAGG-----A--TCATTAATCAG  
TTCCCTGGGTTCATATTATCCCATTGCTTAAGATA---CCCTGTTTCTACCCTTATC---  
-----TCCATTTCTCAATTCCCAATCTCTGTCTCCTCCACTC-CCATTCCCACACT  
GATCCTCCATCTTCC-----CTCCATCCC-----CAATGTATTCTGTGTC-----

-----TCCTTCCCTACTGCTCTTCCATTTCCCCTCTCTCTTCTCTCCTTTTCC  
CCCTCTCCT-TCAG--GAGACAGGAAGATATCCAGCCTACAAGGAGATGGTGTCTGAGTA  
TTGCT

>Ppe

ACCACATCAGTCACAGCCAGGCTGTGGAGGTGCTGAAGGGCCAGACGCACATCATGCTGA  
CCATAAAG--GTAGGCCCTGACCACAG-GGTTGTCAT---AGACCCCTAGGGCCCTGGGA  
TGGAAG---GCAGAAA-----TGGTAGCTACTAGGTTAGGAA  
GCATAGA AACTTTCTAAAAGTAGCAAGTATAAGCACTAAA-TAAGGCAGCCAACTTTATCA  
AAAAGAGCAAGCCCTAGTTTTTTCAGTGGAGGAGGGGCTCTGTATCTCAAAGTAATGGGG  
GGGAA----CAGGATGACTTCTGGAGAGAACCAGGCCTGGGGTCAAGGAGGAGATTGCT  
CCCTGG-GGCCATTACATGGGCAGTGAAA-----GGAAAAGAGGCTGTAGCTC  
T---TATAGATTTGATTT---GGGGGTGGGAGGGTGGGAAGGGAAGCAATTGG-AGTTTA  
-ATGACTTACCCTGGGTCACATAATTAGTAAGTGTCTGAGACCA----GATTTGAA----  
-----CTCCTGACTCTAGGGCCAGAGCGCTATCCATTTTGCCACCACAGTCCCCTT----  
-CCAGATTTGATTT-----TAAG  
AGATAAACCAGG-----AAGGGAGTAGT-GA--TCATTAACAAG  
TTCTTTGGGTCATATTCTTCCATTCCCTTAAGATA----CCCTGTTCCCTACCCTTATC---  
-----TCTGTTTCTCAATTCCCTAATTCCTGTCTCCACCC-CTATTCCCACACT  
GATCCTCCAATTTCTTCCCATCTCCATCCC-----TAATGCATTCCCTCTC-----  
-----CCATTTCTC---CTCTTCCCTTCTCCCCTTTTCC  
CCCCTCTCTTTCAG--GAGACAGGAAGGTATCCAGCCTATAAGGAGATGGTGTCTGAGTA  
TTGCT

>Mr0

ACCACATCAGTCACAGCCAGGCTGTGGAGGTGCTGAAGGGCCAGACGCATATCATGCTGA  
CCATAAAG--GTAGGCCCTGACCACAA-GGTTGTCAT---AGACCCATAGGACCCTGGGA  
TGGAAG---GCTA-----CTAGGTTAGGAAG-GATAAAAAGTAAGTCTGT  
AGGAAGA AACTTTGTAAAAGTAGAAAAGTGTATGCACTAAA-CAAGGCAGCAAATTTTATCA  
GAGAGAGCAAGTCCTAGTCTCTCAGTGGAGGGAGGGGCTCTATATCTCAGAGCAGGGGGA  
TGGAGGGGAACAGGATGACTTCTGGAGAGA AACTAGGCCTGGGATCAAGGAGGAAATTGCT  
CCCT-G-GGCTATTCTGTGAGCAGTGAAA-----GGAAG-----  
T---TCTAGATTTGATTT---TTTTTGGGGGGGGGGGAGGGAAAGCAACTGG-AGTTAA  
-GGGACTTGCCCAAGTA AACTTAGCTGGTAAGTGTCTGAGGCTA----GATTTGAA----  
-----TTCCTGATTCCAAGGTCAGTGCTCAATCCACTGTGCCATCTGACTGCCCTT----  
-GTAGATTTGATTT-----TAAG  
AGATCAACCAGG-----GAAGGAG-----TTAACCAG  
TTCTTGGGTCACATTCTCCCATTGCTTAAGATA----CCCTATTCCCTACCCTTGTC---  
-----CCC-----ATTT-CTCAATTTTCATGTTCCCTGCC-CCATTCCCACACT  
GATCCTCCAGTTTCCCTTAAATCCCATTAC-----TAATGCATTCCCTCTC-----  
-----TCCTCCATTCCCTCTCCCTTTTTTTCCTCTTCCCTTCTTCTCCCCTTTTCC  
CTTTCCCTC-TCAG--GAGACGGGGAGGTATCCAGCCTACAAGGAGATGGTGTCTGAGTA  
TTGCT

MARKER 168

>MIRc

-----  
-----  
-----AATAATAAT  
A--ACCCCTTACATTTGTATAGCACTTTACAGTTTACAAAGCGCTTTCACATACATTAT  
CTCATTTGATCCTCACAACA--ACCCTGTGAGGTAG---GCAGGGCAGGT---ATTATT  
ATC-----  
-----  
-----

>Mdo

-----  
-----  
-----GGGTCCCC-GTTAGAGCGTGCAGGGGAGGGAAGGGATGG-----  
-----CGAGTTAGCGTA-----TG---TCCTGCG  
TGGCCCTGGGGGCC--GCCTCCTTCCCTCCCTGC--CAG--GGTCCCCAAACGCCCGTCA  
TCAACACGCCA

>Dvi

-----  
-----  
-----GTGAGCACTTACATGGGTGTGGGGGGACGGGGAGGAGGGATG-----GTGAG  
TTAGT-----  
-----GCGTCCC-GCCTCCTCCCTCCCTGC--CAG--GGTCCCCAAACGCCCTGTCA  
TCAACACACCG

>Mnu

-----  
-----  
-----GTGAGCACTTACATGGGTGTGGGGAGGACGGGGAGGAGGGATG-----GTGAG  
TTAGA-----  
-----GCGTCCC-GCCTCCTCCCTCCCTGC--CAG--GGTCCCCAAACGCCCTGTCA  
TCAACACACCG

>Rra

-----  
-----  
-----AACTGACTTCCTTTTATTACCTGCGGGTGTACAGGGAAGGCGTGG--GGTTG  
TGCAT--GAGGGGAGCTAAGACTTTGGAGTCCTTGGGGGGTGGGGTTTGACCACATAAG  
CCATGGCTCCGGGGGGGGCCATTTCTCCTCAC--CAG--GGTCCCCAAACGTCCTGTCA  
TCAACACACCA

>Cfu

TGATAAGAGGAGTCTTCG--GTGAGCTTGGCTTGGCTCCCATTTGCCCTTGTCCCTGCCCC  
TTTGCTG--ATG-AAGTGGGGTGAG-----CAGCCCTGTGGAGGGCTATGA--CCT  
GACAAGGAGCTAGCGCTTGTAT-----GATACCTGAAGGCTAAGAAC-----  
-----  
-----ATACTGGCTTCCTTTTGTACCTGTGGGTGTACAGGGAAGGCGTGG--GGTTG  
TGCAT--GCACAGAGCTAAGACTTCGGGGCCCTT-GGGGGGTGGGGTTTGACCACATAGG  
ACACGGCTCC--GAGGGAGCCATTTCTCCTCAC--CAG--GGTCCCCAAACGTCCTGTCA  
TCAACACACCA

>Dgl

TGACAAGCGCAGTCTTCG--GTGAGTTCAGCGTGGCACCTATTGCCGTAT-TCCTTCATC  
TCTTCTGACGCAAAGGAACTGGGCAGAGACCAGGAGCCC-----CATCCT  
GATCAGGGGGG-----TTGTGG-----CTATAATGGGCTCAGTGAGA-----  
-----  
-----GCGGCTGACATTGAGATAGCGTGTGCATGTGC-----GTGTG  
CACGC--GTGTGCACCTG-----TG-A-CCCTGCA  
TGGCCCTGGGGTGCC-ATCTCCTTCCCTCCCCAC--CAG--GGTGCCCAAACGTCCTGTCA  
TCAACACGCCA

>Nty

TGACAAGCGCAGCCTTCG--GTGAGTTTGGCCCAGCTCTCTCACCC-----  
-----ATGGCGGGAGGCACG-----GAGCCT-AAGCAGGCAGGGC---CAT  
CCAGAG-----CACGCCA-----CT-----GGC---ATCTAG-----  
----ATAGCTCGTGAAGGCTGATAGTTTT-----  
-----  
-----GTCTCCTTCTTCCCCAC--CAG--AGTCCCCAAACGTCCTGTCA  
TCAACACCCCG

>Pta

TGACAAGCGCAGCCTGCG--GTGAGCTCAGC-GTGCGCCCGCTGCCCGGCGTCCGTCCCT  
G--CTGATGCAGAGGAGCTGC----GGGGGAGGGGCCG-GGTGGGCGGTGGC----CC  
TCATAGTCGGG-----TC-----AGGAA-----  
-----GCTTCACAGCTGAGTGTGTG-----CCTCGT  
GCCATCTGAGCCTC-CAGCA-----GAGA----GTGCCAGGGACAC-----  
-----GTG----GCCCCGGGTGATAGAGAGT-----CCATGGGCAC--  
-----ACACA-----TG-ACCC-----  
-----GGGGCCCTCTCCTTCCCTCCCCAC--TAG--GGTTCCCAAACGGCCCGTCA  
TCAACACGCCC

>Scr

TGACAAGCGCAGCCTGCG--GTGAGCTCAGCAC-GTGCCCGCTGCCCTGTCCTCTTCTT-  
----CTGATGGAGGGGAGCCGGGGA-GGGGAGGAGCC--AGGCAGGGGGGCTC----CC  
TCATAGTTGGG-----TC-----AGGAAGT-----  
----GTAGCTGGTGTTTAGACCACACTTTACAGCTGTGTTTGTA-----CCGCGT  
GGTACCTGATCCTC-CAGCA-----GAGAGTGTGTGAGGGGCACGT-----  
-----GCAC-----TGGGATAGTGTGTGCAAAGAGCGGAGCAGC--AGGGTGTGGT  
GCAG-GTGCCACGTGCACATCCA-----TG-ACCCTG--  
-----GGGGCCGTCTCCTTCCCTCCCCAC--TAG--AGTCCCCAAACGGCCTGTCA  
TCAACACGCCA

>Mfa

TGACAAGCGCAGCCTGCG--GTGAGCTCAGCACGGTGCCCGCTGCCTGGGGTCCCTTCCCT  
T--CTGATGAAGAGGAGCTGGGA--GGGGAGGAGCCC-AGGC-GGGAGGGC-----



-----AGCC-----CTCAGATTGGCTCAGTAGGC-----  
----ACAGCTGGCATTTAGATCACGCTTTACGACTGGC--AGTC-----GCGCCTTGT  
GTTATCTGATGCACACAACA-----GTGTGCGAGGGACAC-----  
-----GTG-----GCACTGTGACAGTGTGTGCAAG---GAGGTGGAGCAGGTGC----  
-----CCACG-----TGCACCCATGTG  
A--CCCAGGGGGCC--GTCTCCTTCCTCCCCAC--CAG--GGTCCCCAAACGGCCTGTCA  
TCAACACGCCA

>Pgu

AGACAAGCGCAGTCTTCG--GTGAGCTGGGCCAGGTGCCCAATACCT-----  
-----GTGGG-----GAGCGGGGAGGAT-----CCT  
GGGCGATGGGGG---TCT-GC-----TGTGAGAGGGGCTAACACC-----  
-----CACAGTGCTTTAGGGTTTACGCAGTC-----TGTTCCCTTGT  
GTTACTTGATCTTTGCAACA---GCCCGATCAGGG-CTGTGTGGGGGATGT-----  
-----GTAGGATTATGTGTT-----AGTA  
TGTGC--ATGGGCTTCTA-----TG-ACCCTTGCC  
TGGTCTGGGGGCCAT-----CTTCCCCAC--CAG--GGTCCCCAAGCGTCCANTCA  
TCAACACACCA

>Tro

TGACAAGCGCAGCCTTCG--GTGAGCTCCGCCGGCCTCTCACTGCCACGTCCCTGTCTT  
TCTGTTGATGAAGAGGCAGTGGGGAGGAGGAAGGAGCCC-GTGCAGGCGAGGC-TGTCCT  
GCTCACTGGGG-----TTATGG-----CTGCAGCAGGGCCAGGCGG-----  
-----TGCTTGGAG-  
GTTATTTGGCCCTTGTGACA---ACCCTGTCCGAGTGTGTGCAGGGGATGT-----  
-----GTGGGGC-----TTGTTAGTGTGTGTAAGAAAATGGAGCAGCAGGGGATGT-  
AGCAT---GTGTGCATA-----TG-ACCCT---  
-----GGGGCCCTGTCTCCTTCCTCCACAC--TAG--GGTCCCCAAACGTCCCCTCA  
TCAATACGCCA

>Ppe

TGACAAGCGCAGCCTTCG--GTGAGCTCAGTGTGGCTCTCACTGCCACATTCCCTTTCCCT  
TCTTCTGATTGAGAGGCACTGGGGAGGGGGAAGGAGCCC-AGGCAGGTGGGGC-TGTCCT  
GATCACTGGAG---TATACTGG-----CTGTAAGAGGGCCAGTACAT-----  
----ACGGCTGGCATTTAGATAGCGCTTGAAGGGCAACAAAGTC-----CATTCCCTTAT  
GTTATTTGGTCTCAAGACA---ACCTTGTATGTGCAGGTGACATGTAGGG-----  
-----TTGTGTGTTAGTGTGTATAAGAAAATGGAGCAGCAGGGTATGTG  
TGTGC--ATGTGCGCATA-----TG-ACCCTGAA  
TGGCCCTGGGGGCCCTGTCTCCTTCCTCCACAC--TAG--AGTCCCCAAACGTCCCCTCA  
TCAACACACCA

>Tvu

TGACAAGCGCAGTCTTCG--GTGAGCTCAGCATGGCTCCCGTTGCCACATTCCCTTTCCG  
TCTTCTAGTGAAGAGGAACCGGGAAGGGGGAAGGAGCCC-AGGCAGGCGGGGC-TGTCCT  
AATAATTGGGG-----TTATGG-----CTGTAACAGGGTCAGTAAAC-----  
----ATAGCTGGCATTTAGATGGTGCTTTACGGTCGACAAAGTC-----CATTCCCTTCT  
GTTATTCGATCCTCACACA---GTCTTGTCCGAGTGTGTGCACAGGACGT-----  
-----GTAGGATTGTGTGTGTGTTAGTGTGTATAAGAAGATGGAGCAGCAGGCTGTGTG  
TGCAT--GTGCATGCATGTCCCCGTG-----TG-ACCCTGCG  
TGGCCCTGGGGGCCCTGTCTCCTTCCTCCACAC--TAG--GGTCCCCAAACGTCCCTGTCA  
TCAACACACCG

>Mro

TGACAAGCGCAGTCTTCG--GTGAGCTCAGTATGGCTTCCATTGCCTACATTGCTTTCTC  
TTTTGTGATGAAGAGGAG-----GGAGCCC-AGGCAGGTGGGGC-CATGCC  
CAGG-TTGGGG-----TTATGG-----CTGTAACAGAGTCAGTAAAC-----  
----ACAGCTGGCATTTAGATAGTGCTTTAAGGTTGACAAAGTC-----TGTTCCCTTAT  
GTTATTTGATGCTCACACA---ACCCTGTCAGAGTGTGTGCAGGGGATGT-----

-----GTAGGATT-----GTGTGTATAAGAAAAGAAAGCAGCAAGATGTGTG  
CATGT--ATGTGTGCATA-----TG-ACCCCTGCA  
TGGCCCTGGGAGCCCTGTCTCCTTCCTTCCCAC--TA---GGTCCCCAAACGTCCTGTCA  
TCAACACACCA

>Ptr

TGATAAGCGCAGTCTTCG--GTGAGCTCAGTATGGCTTCCATTGCTTACGTTGCTTTCCC  
TTTTCTGATGAAGAGGAA-----GGAGCCC-AGGCAGGTGGGGC-CATGCC  
CAGG-TTGGAG-----TTATGG-----CTGTAACAGAGTCAGTAAAC-----  
----ACAGCTGGCATTTTAGATAGTGCTTTAAAGTTGACCAAGTC-----TGTTCCCTTAT  
GTTATTTGATGCTGACAACA---ACCTTGTCAGAATGTGTGCAGGGGATGT-----  
-----GTAGGATT-----GTGTGTATAAAAAAAGGAAGCAGCAGGATGTGTG  
CATT--ATATGTGCATA-----TG-AGCCCTGCA  
TGGCCCTGGGGGCCCTGTCTCCTTCCTTCCCAC--TAG--GGTCCCCAAACGTCCTGTCA  
TCAACACACCA

>Vur

TGACAAGCGCAGTCTTCG--GTGAGCTCAGCGTGGCTGCCCTGCCCTTAT-----  
---TCTGATGAA---TAACTGGGGAGGGGGATGGAGACC-AGGCAGGTAGGGC-CATCCT  
AATAATTGGGG-----TTGTGG-----CTGTGATAGGGTCAGTTAAC-----  
---ATAGCTGGCGTTCAGATAGTGCTTTAAGGTTGACAAAGTG-----CGTCCCTTAT  
ATCATTCGATCCTCAGACC---ACCCTGTCAGAGTGTGTGCAGGGGATGT-----  
-----GTAGGGC---TGTGTGTTAGTGTGTATAAGAAAGTGGAGCAGCAGTATGTGTG  
TGCAT---ATGTGCGTA-----TG-GCCCCTGCA  
TGGCCCTGGGGGCCCTGTCTCCTTCCTCCCCAC--TAG--GGTCCCCAAACGTCCTGTCA  
TCAACACACCG

>Human

TGACAAGCGCAGCTTGAG--GTCAGC-----  
-----AGCTAGGGGAC-----AGGTGTGGG-----  
-----TAGGGG-----TATGGG-----TCGGGCGGTGAGTGC-----  
-----  
-----TGA-GGC-----ATG-GAGGGGGTCGGGGGCGT-----  
-----CTCCCCA-----GTCATGTGA  
CTGCCGTGGTACTGTGCACCTGACTGCCCCACATCAG--AGTCCCCAAACGCCGATCA  
TCAACACACCC











-----  
-----  
-----  
-----  
-----  
-----  
-----  
-----

-----TACTTGGTACCCTAACTGACTAAAGA-----  
-----ATAGCCACTCTTTACTTTGGGC-ATGTGCGTGTG-----  
-----TCCTCTAATTGAGGCACCCTG-----GGCC-TTCCCTCATGT  
GAAAG-CTGTACACTGGGATTGCATTTG--AACTAGCAGTATTTGGATGGAACCTTCAT  
CT-TTT-TTTCACAG--CCTCAAGAGGACCACAGATG

>Bil

TTACCAAACAGAAGTTTGATAATCTGTATTGCTGCCGAGAGTCCATTCTAGATGG--GTG  
AGTGGAGACTGCAAGTGTCAAATCCATGAGGAGATGAAAATGTGAGGAA--TGGGAGGAA  
AGATAACTTGAAGCTGTTCATG-----GGAAAGGCCATGGA-T  
TTGAGATAAGGGGATCAGG-CCCAGGA-----  
-----CTGCTCTGTGACCCACAAGAAAGTCATTTT-ACTCC  
ATTTGGCCTCAG-TTTCCTCCTCTTTAAAATGAAAGGGTTGGACTAGATGGTATCTAGCC  
TCTTTTCCAGCTCAATCTTA-----TTCTC-----TTTTTTTAATTTA  
TTTTTATTAACAATATTTTGGAGTTTTACAATTCCCCCCCCATCTTGCTTCCCTCCCC  
CACCCACCCACCGGAAAGCACTCTATCAGTCTTTACTTTGTTTCCATGTTGTACCTTG  
ATCCAAATTG--GGTGTGATGAGCTAAATCATATCTTTAAAGAAGAAAAGAGAAGTCCTA  
AGAGGTAACAAGATCAGACAATAAGCTATCTGTTTTTTTCTAAATTAAGGGAATAGTCC  
TTGCACTTTGTTCAAACCTCCACAGCTCCTTATCTGGATACAGATGGCACTCTCCTTTGCA  
GACAGCCCCAAACTGTTCCCGATTGTTGCACTGATGGAATGAGCGAGTCCTTCAAGGTTG  
ATCATCACTCCCATGTTGCTGTTAGGGTGTACAG-TGTTTTCTGTTCTGCTCATCTCAC  
TCAGCATCAGTTCATGCAAATCCCTCCAGACTTCTCTGAAATCCTGTCCCTCCTGGTTTC  
TAATANAGCAATAGTGTTCATGACATACATATAACCACAGTTTGCTAAGCCATTTCCCAA  
TTGAAGGACATTTACTTTGATTTCTGATTCTTTACCACCACAAACAGTGCTGCTATAAATC  
AATCTTATTCTCT---TACTTGGGACAAATGACAACAGCAGCCTTTTTCTCACTCTGTCTG  
ACTCTTTATTGCCTTCTTTTACTCTGGCCCAGGTGGATGTGAATCCCATTTCAAGAGATG  
CCAGTTTGGAGTCCCTTTATTTGAGGCACCCCAAGCCTGGAA---GGC--T-CCCCTATGT  
GAAAA-CTGCATACAGGGATTGTCTTTA--AATTAGCAGTATTTGAATAGAACCTTCAT  
CTTTTTTTT-CCACAG--CCTCAAGAGGACCACAGATG

>Pgu

TTACCAAACAGAAGTTTGATAACCTGTACTGCTGCCGAGAGTCCATTCTGGATGG--GTG  
AGTGGAGACTG-----CAAATCCGTGAGGAGATG-AAGTGTGAGGAA--CAGGAGGAG  
AGTTAACTTGAAGCTTTCGTG-----GGAAAGGCCATGGT-T  
TTGGGATTAGAGGATCAGA-CCCAGG-----  
-----ACTGCTCTGTGACCCACAAGAA-GTCATTTT-ACTTC  
ATTTGGCCTCAG-TTTCCTCCGCTGTAAAATGAAAGGGTTGG-CTAGATGGTATCTGGTC  
TCTTTTCCAGCTCA--GTCTTATC---CTTT-----

-----  
-----  
-----  
-----  
-----  
-----  
-----  
-----



-----  
-----TACTTGGTATAAATGACAACAGCAGCCTTTTCTCACTCTGTCTG  
ACTCTTTATTGCCTTCTTTTACTCTGGCC-AGGTGGATGTGAATCCCATTTCAAGAGATG  
CCNGTTTGGAGTCCTTTATTTGAGGCACCCCAAGGCTGGAA---GGC--TCCCTTTACGT  
GACAA-CTGCACACAGGGATTGTCTTTG--AATTAGCAGTATTTGAATAGAACCTTCAT  
CT-TTTTTTCCACAG--CCTCAAGAGGACCACAGATG

>Iso

TTACCAAACAGAAGTTTGATAACCTGTACTGCTGCCGAGAGTCCATTCTGGATGG--GTG  
AGTGGAGACTG-----CAAATCTGTGAGGAGATG-AAGTGTGAGGAA--CAGGAGGAG  
AGATAACTTGAAGCTGTTCGTG-----GGAAAGGCCATGGT-T  
TTGGGATTAGAGGATCAGA-CCCAGGA-----  
-----CTGCTCTGTGACCCACAAGAAAGTCATTTT-ACTTC  
ATTCGGCCTCAG-TTTCCTCCGCTGTAAAATGAAAGGGTTGGACTAGATGGTATCTGGTC  
TCTTTTCCAGCTCA--GTCTTATGATCCTTT-----

-----TACTTGGTATAAATGACCTCAGCAGCCTTTTCTCACTCTGTCTG  
ACTCTTTATTGCCTTCTTTTACTCTGGCC-AGGTGGATGTGAATCCCATTTCAAGAGATG  
CCAGTTTGGAGTCCTTTATTTGAGGCACCCCAAGGCTGGAA---GGC--TCCTTTTACGT  
GAAAA-CTGCACACAGGGATTGTCTTTG--AATTAGCAGTATTTGAATAGAACCTTCAT  
CT-TTTTTTCCACAG--CCTCAAGAGGACCACAGATG

>Tro

TTACCAAACAGAAGTTTGATAACTTGTACTGCTGCCGAGAGTCCATTTTGGATGG--GTG  
AGTATTAGACCTCTGCGAAA-----GGGGAGGAG  
AGAGAACTTGGAGCTGTCATG-----GGGAA-ACCATAGG-T  
TTGGGGTCTGAGAGTCAGG-CCCAGGCC-----AGG-

-----TCTAGAGTCTCACTTC  
CCTCTTCCAGCTCACAATCTTTGGATCCTCC-----

-----TCCTTGGCACAAG-GGAAAGAGCAG-CTTTCCTCACCTTTTCT-  
---CTTTATTGCTTTCTTTTATTTTGGGC-AGGTGTCTGTGAATCCCATTTCAAGGGACG  
CCATTTTGGGGTCTCTACCTAAGACACCCCGAGCCTGTAA---GGC--TCCCCAGTGT  
GAATG-CTGCACGGG-GCATTACATTTG--AATTG---GCATTTGAATGGAGCCTTCAT  
CT-TTT-TTCTACAG--CCTCAAGAGGACCACAGATG





-----  
-----  
-----  
-----  
-----CT  
CTGGTCTT-----CCTTTGGCTTTAAAAG-TTT-ATTAGAGGGA-CCATT---TCATACT  
GAGCTCAACCAGCTTCCAATTGATATTCTCATGGGCATT-----GGC-----CCACACTTT  
TAACT-TTGTGAAGAGGGACTGAGTTTGAGCTATTAACG---TTTGAGTTGAGCCCTTGT  
CTGTTT---CCACAG--CCTGAAGAGGACCACAGATG













TTAAGGGCTAAGCAATAGGGGTTAAATGATTTTGCCAGTGTACAAAGCTAGGAAGTGT  
CTGAGGCCACATTTGAATCCAGGACCTCC-----AGGCCTGGCCCTCTGT-CACTGTG  
CTACCTAGCTGC-----TCCTAAATTCTTGAT--TGTCTCTA-----  
-----AATGTCTTATCTTTTCAGTTGTA--AGACCA--TTTC  
CCTC-T-----  
-----  
-----

--GATTTTTTCACAGG-AAGAGCCCTAGGCTAGAATTCAAAAGATCTGAGTTCTAATTCCA  
GTTTAGCTGCTCATAGACTTGAT-----CTTTGTC--TTTGATTTTGCTTCT  
CAGTTTCCTTCACTATAAAA-----TGATGAGTTTG-----  
-----  
-----

-----GACTAGGG---TAGCCTTAAAATCCT--TCAAACCCAGCA--  
-----TTCTTGGCATGGTTCCTTTGTATGTGACATT-GCTTAAGTGTACATGTTT  
GTTCTTAG--GTTTATGAGATACGTATGTATGACAGC

>Dvi

GGCCATG--GAAGCAGCAGTTCTCAAGCAACAATATCAAAGGAATCAGCATGCCCTATA  
AAC-CAGTCATCTCATCAGCCCTTCTATTTCCAAAGAGATTAGTGGCAGCAGTCTCAACC  
-TACAGGCATTTGGTCAGCCT--AAGGAAAGTCAATTCTTTGATGTGATAACCTTAAAAT  
GTGT--GAG--GCTGCATGGGTATAG-----  
-----  
-----

-----GGGACAGAATTC-----AAGATTGGGAATCAGGAA  
GATCTGGGTTTAAATTCC-CATTCTGACACTTACAGGCTGTGCAACTACTCGGCCTCTCT  
GC-----  
-----  
-----

-----CAAGAC---TCA---TTTGCATTTTCTTTC-TTTTTTTTTTTTTTAAAC  
AAACTCTTACCCTTCCATCTTAGAATCAATACTATGCATCAGTTCCAAGACAGAAGAGTA  
TTAAGGGCTA-GCAATAGGGGTTAAATGACTTTTATGCAGTGTGCGCACAGCTAGGAAGTGT  
CTGAGGCCACATTTGAACCCAGGATCTTC-TATCTTCAGGCCTGGCCCTCTGTCACTGAG  
CCACCTAGCTGC-----TCCTAA-----ATTATATATTCTTGGAAACTGT  
TGGAATCCTGTATT-GTATCTTAATGTCTTATCTTTCCAGTTATA--AGACCA--TTTT  
CCTCTGA-----  
-----  
-----

--CACTTTTTCACAGG-AAGAGCCCTAGGCTAAAAGTCAAAGATCTGAGTTCTAATTTGA  
GCTTAACTGGTCATAGACTTGAT-----CTTTGTT--TTTGACTTTGCTTCT  
CAGTTTCCTTCACTATAAAA-----TGATGGGTTTG-----  
-----  
-----

-----GACTAGGG---CATCCTTAAAATCCT--TGAAAATCCCAGCA--  
-----TTCTTGGCATAGTTCCTTTGTATGTGACATT-GCTTAAGTGTACATGTTT  
ATTGGTAG--GTTTATGAGATACGTATGTATGACAGC

>Mnu

GGCCATG---GAAGCAGCAGTTCTCAAGCAACAATATCAAAGGAATCAGCATGCCCTATA  
AAC-CAGTCATCTCATCAGCCCTTCTATTTCCAAAGAGATTAGTGGCAGCAGTCTCAACC  
-TACAGGCATTTGGTCAGCCT--AAGGAAAGTCAATTCTTTGATGTGATAACCTTAAAAT  
GTGT---GAG--ACTGCATGGGTATAG-----  
-----  
-----

-----GGGACAGAATTC-----AAGATTGGGAATCAGGAA  
GATCTGGGTTTAAATTCC-CATTCTGACACTTACAGGCTGTGCAACTACTCGGCCTCTCT  
GC-----  
-----  
-----  
-----  
-----

-----CAAGAC----TCA----TTTGAATTTTCTTTCTTTTTTTTTTTTTTAAAC  
AAACTCTTACCCTTCCATCTTAGAATCAATACTATGCATCAGTTCCAAGGCAGAAGAGTA  
TTAAGGGCTA-GCAATAGGGGTTAAATGACTTTATGCAGTGTACACAGCTAGGAAGTGT  
CTGAGGCCACATTTAAACCCAGGATCTTC-TATTTTCAGGCCTGGCCCTCTGTCACTGAG  
CCACCTAGCTGC-----TCCTAA-----ATTATATATTCTTGGAGTGCTGT  
TGGAATCCTGTATT-GTATCTTAATGTCTTATCTTTCCAGTTATA--AGACCA--TTTT  
CCTCTGA-----  
-----  
-----  
-----

--CACTTTTTCACAGG-AAGAGCCCTAGGATAAAAAGTCAAAAGATCTGAGTTCTGATTTGG  
GCTTAACTGGTCATAGACTTGAT-----CTTTGTT--TTTGACTTTGCTTCT  
CAGTTTCCTTCACTATAAAA-----TGATGGGTTTG-----  
-----  
-----  
-----

-----GACTAGGG---CATCCTTAAAATCCT---TGAAAACCCCAGCA--  
-----TTCTTGGCATAGTTCTTTGTATGTGACATT-GCTTAAAGTGTACATGTTT  
ATTGGTAG--GGTTATGAGATACGTATGTATGACAGC  
>Rra

AGTCATG---GAAGCTGCTGTCCTTGAGCAGCAATAGCAG-----TCAGCTTGCCTGCTA  
CAC-TCATCATCTCAAAGGCCCTTCTCTTCCC-TCAAAATCACTAGCAGTTGTGTGAACT  
-GAAAGGCTTTTTCCTTGGCCT--GTGGAAAGTCAAGTTTTTGGATGTGTTAGCCTTAAAAA  
GTAT---GAG--AC-ACTATAGCATAG-----  
-----  
-----

-----TTGATAGAGTTC-----AAGATTTGTAGTCAAAAG  
GAC-----TCTTT-ACTTTAACATTTAGAAGCTATGTGACCATACATCCTCTCT  
GAACCTGAGGCAACTAATTCC---CCAAGACCT----TGTTGTT---GTTCACTCATTTT  
-AGAGACATCTGACTCTTTGTGGCCCTATAGCCTTTTATCTGTGTGTTG-----TTTT  
TTTTTAACAAGGACATTGGAGTGGTTTTTCTATTTCTTTGTCTGGGATTCATGAAAGGC  
ACTT-ACAGTCATTAATGATTTTGCATTTCAAATACAAGTCCCCTCATAAGTGACTTCTC  
CAGGGTCACATAGCTAGTATGTGTCTGAAGCTGGATTTAAACTCAGGTTCTCCTGGCTAA  
TAAACCCAGTGATCTGCCCATTTGTACCACCTAAGCTGCCAC---CTGAGACTT---AC  
CTTCTGAGTTGTAGACAGATTTTAC-----CTGCCACCATAAA  
GAGAAT---TCCAGTAAC-----  
-----  
-----

-----  
-----ACTACATATACTTGACATAACCAT  
TGTAACCCTATATT-GTATCCTAATGTCTCATCTTTCCAATTATG--AGACCA--ATTT  
CCCTAT-----  
-----

-----  
-----GACTTTTCA-TGGAAAAACCAA-GGCTAGAAATTAAGAG-----TTCTAATGCCT  
ACTTAGCTGGCTTTGGACTTGGT-----CTCTGACCAGATAACTGTGCTTCT  
TAGTGTCTTTCTCTAT-AAA-----TGATGAGTTTG-----  
-----

-----  
-----GACGTGTG---TATCTTTAAGGTCCC---TTAAAACTCCCACA--  
-----TTCTTGGTCTGGTCCCTTTATGTGTGATATTTCCCTTATGTGCACCTTCTT  
GCTCTTAG--GGTTATGAGATACGCATGTATGACAGT

>Cfu

AGCCATG---GAAGCTGCTGTCCTTGAGCAGCAGTATCAGAGCAATTAGCTTGCCCACTA  
CAC-TCATCGTCTCATCAGCCCTTCTTTCCC-TCAAAATCACTAGCAGCTGTGTGAACT  
-GAAAGGCTTTTCCCTTGGCCT--GGGGAAAGTCAGTTCTTGGATGTGTTAGCCTTAAAAA  
GTGT---GAG--AC-ATTATAGCATAG-----  
-----

-----  
-----TTGATAGAGTTC-----AAGATTTGTAGTCAAAG  
GAC-----TCCCT-ACTCTAACATTTAGAAGCTGTGTGACCGTACATCCTCTCT  
GAAACTCAAGCAACTAACTCC---CCAAGACTT---TGTTGTT--ATTCACTTGTTTT  
-AGAGACATCTGACTCTTTGTGGCCCCCATAGCCTTTTGTCTGTGGTTTTTTTTTTGTTTTT  
TTTTTAACAAGGACATTTGGAGNGTTTTTGCATTTCTTTGTCTGGGATTCATGAAGGGC  
ATTT-ACAGTCATTACTGTATTTGCATTTCAAATACAAGTCCCCTC-TAAGTGACTTCTC  
CAGGGTCACATAACTAGTATGTGTCTGAAGCTGAATTTAAACTCAGGTTCTCCTGGCTAA  
TAAACCCAGTGCTCTGCCCACTGTACCACCTAAGCTGCCAC---CTGAGACTT---AC  
CTTCTGAGTTGTAGACAGATTTTAC-----CTGCCACCATAAA  
GAGAAT--TCCAGTGAC-----  
-----

-----  
-----ACTGCATATACTTGACATAACCAT  
TGTA AACCTATATT-GTATCCTAATGTCTCATCTTGCCAATTATG--AGACCA--ATTT  
CCCTAT-----  
-----

-----  
-----GACTTTTCA-TGGAAAAACCAA-GACTAGAAAT--GAG-----TTCTAATGCCT  
ACTTAGCTGGCTGTGGACTTGGT-----CTCTGACCAGATAACTTTGCTTCT  
AAGTGTCTTCCCTAT-AAA-----TGATGAGTTTG-----  
-----

-----  
-----GACGTGTG---TATCTTTAAGGTCCC---TTAAAACTCCCACA--  
-----TTCTTGGTCTGGTCCCTTTGGGTGTGATATTTCCCTTATGTGCACCTTCTT  
GCTCTTAG--GGTTATGAGATACGCATGTATGACAGC

>Dg1

GGCCATG---GAAGCAGCTGTCCTCCAGCAATAGCATCAAAGGAATCAGCTCGCCCTATA

AAC-CAGTCATCTCATCAGCCTTTCTCTTTCCAAAGAGATAAGTGGCAGCAATTTGAACT  
-TAAAGGCATTTGGTTGGCCT--CAGGAAAATCATCTCTTTGGTGTGGTAACCTTAAAAT  
GCTT---GAG--GCAATATGG-CATAG-----

-----TTGATAGACTTT-----AAGACATGGAGTCGAAAA  
GAA-----AATCCCC-ACTCTAACTCTTAGGGGCTGTGTGACTTCTCACTCTCTTT  
-C-----

-----TAAC-ACTTA---AC  
CTGTTTCAGT---GATAGATTAGAT-----TTGTGTTGGCAAA  
GGGAAT---TCCCACACCAGTGAA-----

-----ATTGCATGTTCTTGATGTGTTAT  
TGTA--CTATATT-ATATCCTAATGTCTCCATTTTCTAATCACG--AGACCA--TTTT  
CTCTAC-----TGGTTGGTTGTTGTC---CTTTGTTCTCAAAGGGGATCAAAATGACAT  
CACTATGTTGGGGTCAAAGG-CAGTGTGTCCCATTTGTGTTTGATCAGACCAAGATGAGCT  
CCAAAGGCTCTGGCACAGGTGGGACACAAGTAATCCATGTGAACATTTAGAG-TGGAGAT  
GTCTCTAAATTGACACATCTCCTGTTTCTTTG--AGCT---ACT-GTTTTTTCCTTAA--  
--TACTTTTCA-TGGAAAGAGTACTAGGCTAGAAGTCAAGAGATCTGAGTTCAA-TCCCA  
GCTTAGCTTACCATGCACTTGAT-----CTCTGTCTTTGACCAGATCACTTTGCGCCT  
CAGTTTCCTTCACTATAAAA-----TGATGGGTTTG-----

-----GACCAGAA---CATCTTTGAGGTCCC---TTAAACTTTAACA--  
-----TTCTTGGTATGGTTCTTTGTTTCGTGATATTTCTCAAGTCTACATGTTT  
GCTCTTAG--GGCTACGAGATACGCATGTATGACAGT

>Nty

AGTCACA--TAAGCAGCTGGCCTCAAGCAACAATATCAAAGGAATCAGCTTGCCCTATA  
AAC-CAGTCATCTCATTAGCCCTTTTCTTTCCATAGAGATAAATGGCAGCAATTTGAACT  
-TAAAGGCATTTGGTTGGCCT--AAGAAAAGTCAGTTATTTGAGGTGGTAACCTCAAAAT  
CTTT---GAG--GC-AATAGGGCATAG---TTTTTTTTAAAATATTTTACAAGGCAAT  
AATGGTTAAGTAATTTGCCCAAGGTCACACACCTTGTAAGTATCAAGTGTGAGGGCTGA  
ATTTGAACTCAGGTCCTCCTGACTCCAGGGCTGGTGTCTTATTTCCTGTTCCATCTAGC  
TACCC--GGTATGACATAG--TTGATAGAGTTC-----AAGACTTAGAGTCCAAAA  
GGA-TATGTTTAAATTGCC-ACTCTGATACGCAGGGGCTTTGTGACTCCTCAACTATTCT  
GC-----

-----TTAG-ACGT---AC  
CTGATCAGTTATAGACAGATTACAT-----TTGCATTGGTAAA  
GGGAAT---TCCCACGCTAGTTAA-----





TAACTCTTTATT---GTATCCTAACATCTCCACTTTCTAATTACT---TAACCATTTTTT  
TCCTAC-----TAGTTGG-TGTTGTC-----TTTGTTCTCAAGGAGGATCAAACCTGACAT  
CACTATATT-GGGTC-AGGTGTGTCGA-----TTGATCAGACCAATGCAA-GCTCA  
GAGG--TCTCTACTACAGATCGGACACAAATAGTCCAAATCTATCTATAGA--TGGATAT  
GTCTCTAGATTTGCACTTCTCATTTTTTTTA---AGCT---ACTGCATTTTTTCCTTAC-  
--TACTTTTTCA-TGGAAAGAGCTCTAGGTTAGAAGTCAAGAGATCCGACTTGA-----  
-----TTTCTGTCTGATCAGATCATTTTGTTCTT  
CAGTTTTCTTCACTGTAAAA-----TGATGGGTTTG-----  
-----  
-----GACCAAAA---CATATTTGAGATCCC---TTAAAACCTCCAAAAT-  
-----TGTCTTGGTATGGGTCTTTGTATGCGATATTTGCTCAGGTCTACATGTTT  
GCCCTTAG--GGTTACGAGATACGCATGTATGACAGC

>Pgu

AGCCGCCGTGTAAGCAGCTGTCTTCAAACAGCTGTGTCAAAGGAATCATTTTGCCCTATA  
AA-TTAGTCATCTCACCAATCCTTATCTTTCC-----AGATAATTTGAACT  
-TAAAGGTATTTGATAGGCCT--AAGGAAAGTCAGTTATTGGATGTGGTAATCTTAAAAT  
ATTT---GTG--GAAATATAA-TACAG-----  
-----  
-----TTAAAC-----TGGAGTCTAAAA  
GACTTGGGTTTGAATCCCCATCCTT-ACATTTTGGAGGT-----TCTCT  
AC-----  
-----  
-----TAGG-ACTT----AC  
CTATTCAGTTATAAAGAGATTACATTTGCAGTGGATACTGGTTA---ATATCTAGTAAA  
GGAAGG--TCCCACACAAGTGA-----  
-----  
-----ATTGCATTTTCTTGATATTATTA

TAACTCTATATT-----GTATCCTACTTTCCAATTACT---TAACCA--TTTT  
TCCTAC-----TAGTTGG-TGTTGTCCTTTGTTTTGTTTTCAAAAAGGACCAAACCTGACAG  
CACCATATTGGGGTC-AGGTGTATCGG-----TTGATCAGCCCAATACAA-GCTCA  
GAGGTCTCTTACCACAC-GTGGACACAAATATCCGAACCTACCT-TAGA--TGGAGAT  
GTCTCTAGATTTGCACATCTCATTTTTTTTAAAC--TACT-----GC-TTTTTCTTAC-  
--TACTTTTTCA-TGGTAAGAGCTCTAGGTTAGAAGTCAATCAGACTCAA-----  
-----TCTCTGTCTGATCAGATCATTTTGTTCCC  
CAGTTTTCTTCACTGTAAAA-----TGATGGGTTTG-----  
-----  
-----GACAAGGA---CGTATTTGAGATCCC---TTAAAATGCCAACA--  
-----TTCTTGGTATGGTTCTTTGTATGTGATATTTGCTC--ATCTACATGTTT  
GCTCTTAG--GGTTACGAGATACGCATGTATGACAGT

>Iso

AGCCGCCGTGTAAGCAGCTGTCTTCAAACAGCTGTGTCAAAGGAATCATTTTGCCCTATA  
AA-TTAGTCATCTCACCAATCCTTATCTTTCC-----AGGTAATTTGAACT  
-TAAAGGTATTTGTTTGGCCT--AAGGAAAGTCAGTTATTGGATGTGGTAATCTTAAAAT



ATTT---GTG--GAAATATAA-TACAG-----  
-----  
-----  
-----TTAAACTGATAG---TCACAACCTGGGAGTCTAAAA  
GACTTGGGTTTGAATCCCCATCCTT-ACATTTTGGAGGT-----TCTCT  
AC-----  
-----  
-----TAGG-ACCT---AC  
CTATTCAGTTATAAAGAGATTATATTTGCAGTGGATACTGGTTATTATATATCTAGCAAA  
GGGAGG---TCCCACACAAGTAAA-----  
-----  
-----ATTGCATTTTCTTGATATTATTA  
TAACTTTATATT-----GATCTACTTTCCAATTACT---TAACCA--TTTT  
CCCTAC----TAGTTGG-TGTTGTCTTTGTTTTGTTTTCAAAAAGGACCAAACCTGACAG  
CACCATATTGGGGTC-AGGTGTATCGG-----TTGATCAGCCCAATACAA-GCACA  
GAGGTCTCTCTACCACACGTTGGACACAAATTATCCAAACCTACCT-TAGA--TGGAGAT  
GTCTCTAGATTTGCACATCTCATTFTTTTTTTTAAAGCT--ACTGC-TTTTTCTTAC-  
--TACTTTTCA-TGGTAAGAGCTTTAGGTTAGAAGTCAATCAGACTCAA-----  
-----TCTCTGATCAGATCATTTTGTTC  
CAGTTTTCTTCACTGTAAAA-----TGATGGGTTTG-----  
-----  
-----GACAAGGA---AATATTTGAGATCCC---TTAAAATACCAACA--  
-----TTCTTGATATGGTTCTTTTTATGTGATATTTGCGC--GTCTACATGTTT  
GCTCTTAG--GGTTACGAGATACGCATGTATGACAGT  
>Tro  
AGCCATG---TAAGCAACTGTCCTCAAGCAGCAGCATCGACGGGATCAGCTTGCCCTATA  
AA-----CCTCCCAT--CCACCCCTCTTTCC--AGAGAGAAGTGGCAGCGGGTTGAACT  
CTAAAGGCATTTGGCCAGCAT--ACGGAAAGTCAGTTATCTGATGTGGTAACCTCGAAAC  
GCTT---GAG--GCAGTATTG-CAGAG-----  
-----  
-----TTGATGGACTTCAGGACTTGGT-GTCCACAT  
GACCTGGGTTTAAACTCCT-GCTCTGACCCTTAGGGGCTGTGTGACTCCCCGCCTTGT--  
GC-----  
-----  
-----CGAG-GCTT---AT  
CTGCTCCATT---ACAGATTACAT-----CTGCATCAGTAAA  
GGGAAC--TCCCACACCTGTGAAG-----  
-----  
-----ATACCCTATTTTTCATGTGCTAC  
TGTTACTTG--TGCTGAAGCCTAATGTCTTTAGTTTCCATTTACA--AGACCA--TTTT

CCCTG-----CTGATCAGGGGCGTC----CTTTGTCTTG-AAGAGGACCAAATGACAG  
CACTATGTTGGGGTC-AAGTACAGTGTGCCAAAGGTGGCTGGTCAGAGCAGTATGAGCT  
-GGGAGGGCCTATCACAGATTGAGCACAAACAGTCTGTGTGAACATTTGGGCTTCTAGAG  
GTCTCTAAATTTGCACATCTTATTTTTCTTTTG--AGCT-----CCCCC-AC-  
-----TTTAA-TCAAAAGACCACTAGGGGAGAAGTCAAGGGACTTGAATTTTAATCCTA  
GCTTAGCTGGCCCTGGACTTCAT-----CTCTATGTCTGATCAGATCACTTTGCTGCC  
CAGTGTCCCTTACTACGAAATACTATATGATCAGTTTA--GACCACGA--CAGGGGTA  
AGGAACCTGCAGCCTCAAGGCCACACGTGGCCCTCTAGGCGGCCCTTTTTTAAGGGTCAA  
-----ATCTCCTTAATAAAAAGGATTTGTTCTGTAAAACCTTG  
G-----ACTCAGTCCACACCTGATTACCTACAAGGCCACATGGGGCCTCAAGACCCTG  
-----AACCAGGA--CATGTTTGAGGGCC--CCAACACTCCAGCA--  
-----TTCTTGGTATGGT-CTGCGTATCTGATATTTGCTCAAGTCTACGTGTTT  
GCTCCTAG--GGTTATGAGATACGTATGTATGACAGC

>Ppe

AGCCACA--GAAGCAGCTGTCCTCAAGCAGCAATATCAGCGGAATCAGCTTGCCCTATA  
A-GCCAGTCATCTCATCCACCCTTCTCTTTCC--AGAGATAAGTGGCAGCAAATGAGCT  
TTAAAGGCATTTGGTTGGCCT--AAGGAAAGTCAGTTATCTGATGTGGTTACCTTGAAGT  
ATTT--GAG--GCAGTGTGG-CATAG-----

-----TTGATAGAGTCCAAGACCTGGC-GTCCAAAT  
GACCTGGGCTTAAACCCCCTACTCTGACCATTAGGGGCTGTGTGAATCCCCACCTTCT--  
GC-----

-----CAAG-GCTT----AC  
CTGCTCAGTT---ACAGATTATGT-----TTGCATCGGTAAA  
GGGAAT--TCTCACACCAGTGAA-----

-----ACTGC-----CATGAC  
TATAACTCTTATGTTTTATCCTCATGTCTCTGCTTTCCAGTTATG--AGGACA--TTTT  
CCCTAC-----TCATCCGTTGTTGTC----CTTTCTCTT-AAAGAGGACCAAATGACAT  
CGTTATGTTGGGGTCCAGGTACAGCGTGCCCTACGGTGGCTGGTCAGATCAGCATGAGCT  
TAGCAGTCCCTGTACAGACCGAGCACAGATCATCCGGGTGAACATTTGGAG-TGCAGAT  
GTCTCTGAATTTGCACATCTCATATTTCTTTTG--AGTT--ACTGC-ATTTCCCT-AC-  
-----TTTA--TGAAAGAACACTAGGGTAGAAGTCAAGAGATCTGAATTTCTAATCCCA  
GCTTAGCTGGCCCTGGACTTCAT-----CCCTGTGTTTGACTAGATCACTTTGCTCCT  
CAGTTTACTTCACTATAAAG-----TGATCGGTTTG--GACCAGGC--CAGGGGTG  
AGGAACTGGTGGCCTCAAGGCGGCACATGGCCCTCTAGTTCTTCAAGTGCAGTCCTTTGA  
CTGAATCAAGATTTACAGATCAGATCTCCTTAATAAAAAGGATCTGTTCTGTAATGCTTG  
GACTCAGTCAGAAGGCCACACCTGAGGACCTAAGAGGCCCATGTGGCCTCGAGGTCTG  
-----AACCAGGA--CATCTTTGAGGCC--CTAACACTCCAGCA--  
-----TTCTTGGCATGGCACTTTG---TGATATTTGCTCAAGTCTACATGTTT  
GCTCTTAG--GGTTACGAGATACGCATGTATGACAGC

>Mr0

AGCTACG--TAAA--TAGCTCCTCAAGAAGCACTATCAACGGAATCAACTTGCCCTATA  
AAC-CAGTCATCTCATCAGCTCTTCTCTTTCC--AGAGATAAGTGGCAGCAAATGAACT  
TTGAAGGCATTTTTTTT-----GGAAGTCAGTTATTTGATGTAGTAACCTTAAAAT  
GTTT--GAG--GA-ACATGG-CACAG-----







-----  
-----ACCCTAAGGACCATGGGACCTTTCCATCTG  
ACTTGCAGCTGAAA--CCTTCCATATGTGTGTCTCCCCATTAGAATGTGAGCTCCTTG  
AGAGCAGGGACTGTCTTACTTTTCTATTTGTA-TCCCCAGCGCTTAGCACAG-----T  
GCTTTGCACATAGTAAGTGCTTAATAAATGCTTTATTTCATTCATTCATT-----  
-----  
-----  
-----

>Mdo

-TATTG-CTCGCCAG--GTAAGTTGGCCATGGCTGAGGGCGGAATGAGGA-AGGACTTA  
AGAGCCATAGTCAAAGC----ATGACTTCCGTGCCATTCCATTTCTCTGTACCAGCTGGC  
ACT-----  
-----

-----CAT-CACCCC---CCAGGCAAATCCT--TTCTT  
CTTCCCTCTTTTTCTTTCCCATCCCATCTCTTT-----  
--TCTTCCCTTCTCCTTCTCACT---TTCTCAATCCTC-----  
CCATTGCCCTTCCCTTCCCTC-----  
-----  
-----

-----TTCCTC-----TCCTTGCATATTGTCC-TCCATTAGAATGTATTCTCCTTG  
AGGTCAAAGACTGTTTTGTCTTTGTCTTAGCA-TCAACTGAT-----GGAAA-----T  
GGCTCTGAATAA-TTGTGATTAATTCCTCC-----CTTTTCTCCTTTCTT  
TTCTGCTGATCCTTAATAAGGAATTGGGCAGTGAGTGCCCTCTACAGCTCTCTTTCCCT  
GGGAGTCTGTAAGGTGT-TCTGGATGG-GGCTGGGGATCAGGTGTCTGCTTCTGGAATGG  
CCTTTACCTCTTATGGGCAGAGGTGGGG-TCAATAACTCACAATTGGATCCCCTTCTAG-  
-GATGAAGATGGGAAGCAGCTGTCAGAT

>Dvi

-TATTG-CTGGCCAG--GTAAGCCGGCCATAGCTGAGGGCCAGATGAGGA-AGGGCTGA  
AGAGTCATGGGCAAAGC----ATGACTTTGTTGTCATTCCCTTTCTCTGTACCAACTGGC  
ACT-----  
-----

-----CAT-CA-CCT---CCAGGCAAATCCT--TTCTT  
CTTCCACTCTTTCCTTTCCTAACCATATCTTT-----TCTCTCCTTCTCTC  
TTCTCTCTCCCTTTCTCCTCACTCTCCTCAATCCTCTTCCCTTCCCTTTTTCAGTTT  
CTTCTGCCCATGTCC-----TTTCTCTCCTTT--CTCTCCTTGCATGT-----  
-----  
-----

-----TGTC--TCCATTAGAATGTATGCTCCTTG  
AGGTCAAAGATGTTTTGTCTTTGCCTTAACA-TCAGTTCATTGCCTAG-----T  
GG-ATGGCATAA-TTATTGATTGATTTCTCC-----CTTTCCTCCTTTCTT  
TNCTGCTGATCCTCAACTGGAAATTGGGTAGTGAGTGACCTCTACAGCTCTTCCCTTCCCT  
GGGGGTCTGGAAAGTAT-TCTGGA-GGGGGCTGGGGATCAGGTGTCCGATTCTGGAATGG  
CCTTTGCCTGTTATGGGCAGAGGTGGGAGTCAACAACCTCACAACCTAGATCCCCTTCTAG-  
-GATGAAGATGGGAAGCAGCTGTCAGAT

>Mnu

GTATTGCGTGGCCAG--GTAAGCTGGCCATAGCTGAGGGCCAGATGAGGA-AGGGCTGA  
AGAGTCATGGGCAAAGC----ATGACTTTGTTGTCATTCCCTTTCTCTGTACCAACTGGC  
ACT-----  
-----

-----  
-----CAT-CG-CCT---CCAGGCAAATCCT--TTCTT  
CTTCCACTCTTTCCTTTCCTAACCATATCTTT-----TCTTTCCTTCTCTC  
TTCTCTCTCCCTTTCCTCACTCTCCTCCTCAATCCTCTTCCCTTCTTTTTTCAGTTTC  
CTTCTGCCCATGTGCC-----TTTCTCTCCTTTTTCTCCTCTCCTTGCATGT-----  
-----

-----TGTCC-TCCATTAGAATGTATGCTCCTTG  
AGGTCAAAGACTGTTTTGTCTTTGCCTTAACA-TCAGTTCATTGCCTAG-----T  
GG-ATGGCATAA-TTATTGATTGATTTCTCC-----CTTTCCTCCTTTTCTT  
TTCTGCTGATCCTCAACTGGAAATTGGGTAGTGAGTGACCTCTACAGCTCTTCCCTTCCCT  
GGGGGTCTGGAAGGTGT-TCTGGA-GGGGGCTGGGGATCAGGTGTCCGATTCTGGAATGG  
CCTTTGCCTGTTATGGGCAGAGGTGGGGGTCAACAACCTCACAACCTAGATCCCCTTCTAG-  
-GATGAAGATGGGAAGCAGCTGTCAGAT

>Dgo

-TGNTG-CTGGCCAAG--GTGAGCAAAGGAGGACGAGGGTGGGGTGAGGA-AGGGC-T-  
GGAGTCATGGCCAAGC----CTGACGTTGACTTTATGCCAGTTCTCTGAACCACCCCTC  
ACT-----  
-----

-----CAT-CA-CCC---CCTAGCAAATCCT--TTCTC  
TTTCTCCT--CATCTCCCTCCGTGCCTCTCTT-----CCCTTTCCCTTCCCTCTCGG  
TTTTCTTTCCCTTCCCTTTTTCTTTCTTCCAAATTCCTCTTCTCTTCTCTT-CCCC--  
---TTTTTCCTCTTC-----TTCTCCCTCTTCTTGCTGTCCTTCCATGC-----  
-----

-----CCTTCCTTGTGTAATCTGCTTG  
AAGTCAGGGGCTGCTTTGCCTTTGTTTTCACA-TCAGCTCACAGCCTGAAACAC-----A  
GTGACTGAACAA-TTGCTTGGTGATCTATTC-----CTACTTCTCTTCCCTTCC-T  
CTCTGCTGTTCTCAACGTGGCACGGGGCAGCATGTGCCATCTACAACCTTCCCTTCCCT  
GGGAGTCTGGAGGGTGA-----GCCAGGTGTCTTCTCCTG-----G  
CCTTTACCTCTTATAGGTAGAGGTAAGG-TCCATCATTCCCAACTGCAATCCCTTTTCAG-  
-GATGAAGACGGGAAGCAGCTATCAGAT

>Scr

-TGTTG-CTGGCCAAG--GTGAGCAAGGGA-GGCTGAGGGTGGAGTGAGGA-AGGGC-T-  
GGAGTCATGGTCAAAGC----CTGACTTGGACTTTATGCCAGTTCTCTGAACCTATCCCTC  
TCT-----  
-----

-----CAG-GA-CCC---CCTGGCAAATCCT--TTCTT  
TCTCCTCA---TCTCCCTTCTTGCCTCTCTT-----CCCTTTTCCTTTCTTTCTG  
TTTTCTTTCCCTTCCCTTTTTCTTTCTTCCAAATTCCTCTTCTCTTCTCCTTCCCC--  
-TTCTCTTTCCCTCTTC-----TTCTCCCTTTTCTTGCTCTCCTTCCATGCTACTTCTCC  
TTTGTGCCCTT-----  
-----

-----TGTGC-TCCATTAGAATCTAATCTGCTT-  
-AGTCAGAGACTGTTTTGCCTTTGTTTTTGCA-TGAGCTCACAGCCTGAAACAG----CA  
GTGACTGAACAA-TTGCTTGGTGATGATTC-----CTACTTCTCTTCCCTTCC-T  
CTCTGCTGATCCTCCACATGGCACTGGGTAGCGAGTGCCATCTACCACCTTCCCTTCCCT

GGGAGTCTGGAGGGTGA-----GCCAGATGTCTTGTCTG-----G  
CCTTTACCTCTTATGGGTAGAGGTAAGC-TCCATCATTCCCAACTGTAATCCCTTCTAG-  
-GATGAAGATGGGAGGCAGCTGTCAGAT

>Pgu

-TGTTG-CTGGCCAAG--GTGAGCAAGGGA-GAATGAGGGCAGGGTGAAGG-AGGGCCT-  
AGAGTCATGGTCAAAGG----CTGACTAGGACTTAATGCCATTTCTCTGAAGCATTCCCT  
GCA-----

-----CAT-CA-CTC---CCTGGCAAGTCTTCTTTCTT  
CTTCCTC-----CCCTCCAT-----TTCCCTTCCTTTCTCT  
TTTCTTTTTCTTTCTTCT-CCCTTTCTTCTTTATTCCTCTTCTCTTCT---CCCC--  
-TTCTTCCTCTTCTTC---TCATTCTTCTTTCCCTGCT-GCCTCTCATC-----

-----TTT  
TATTTCTGTC-----CTATATATGTGCACATTGCCCCCTCATTAGAATCTAATCTGCTTG  
AAGTCAGGGGCTGTTTTGCCTTTGCCTTTGC--TCAGCCCATGGATTGGCACAG-----T  
GGCTCTGAACAAATTGCTTGTGTTGATTTC-----CTACTCCCCTTT---GTT  
CTCTGCTCTTCTTCAACTAGACTCTGGGTAGAGGGTTCCCTCTATAGTCTTTCCCTTCCCT  
GGGAATCTGGAAGGTAATTCTGGA-----GAGTGGGACAGGTGTCTCCTCCTGGAATGA  
TCTTTGTTTATTATGGGCAGAGGTGGGGGTCAATCACTCACAACCTGGAACCCCTTCTAG-  
-GATGAAGATGGGAAGCAGCTTTTCAGAT

>Iso

-TGTTG-CTGGCCAAG--GTGAGCAAGGGA-GAATGAGGGCAGGGTGAAGG-AGGGCCT-  
AGAGTCATGGTCAAAGG----CTGACTTGGACTTAATGCCATTTCTCTGAAGCATTCCCT  
GCA-----

-----CAT-CA-CTC---CCAGGCAGGTCTTCTTTCTT  
CTTCCTC-----CCCTCCAT-----TTCCCTTCCTTTCTCT  
TTTCTTTCTTCTTCTTCT-CCCTTTCTTCTTTATTCGTCCTTCTCTTCT---CCCC--  
-TTCTTCCTCTTCTTC---TCATTCTTCTTTCCCTGCT-GCCTCTCATC-----

-----TTT  
TATTTCTGTC-----CTATATATGTGCACATTGCCCCCTCATTAGAATCTAATCTGTTTG  
AAGTCAGGGGCTGTTTTGCCTTTGCCTTTGC--TCAGCTCATGGATTGGCACAG-----T  
GGCTCTGAACAAATTGCTTGTGTTGATTTC-----CTACTCCCCTTT---GTT  
CTCTGCTCTTCTTCAACTAGACTCTGGGTAGAGGGTTCCCTCTACAGTCTTTCCCTTCCCT  
GGGAATCTGGAAGGTAATTCTGGA-----GAGTGGGTCAGGTGTCTCCTCCTGGAATGA  
TCTTTGTTTATTATGGGCAGAGGTGGGGGTCAATCACTCATAACTGGAACCCCTTCTAG-  
-GATGAAGATGGGAAGCAGCTTTTCAGAT

>Tro

-TGCTG-CTGGCCAAG--GTTGGTGGCCAA-GGGC-----AGGGTGAGGA-AGGGCCT-  
AGAGCCATGGGCAAAGCCTGCCTGGC-TTTACTTGAAGTCATTTCTCTGAACCACCTTTC  
CCT-----

-----CAT-CA-TCC---CCTCGCAAGTCTTCTTTCTT  
CTTCCTC---TCCTCTCTGCACGCCTCTTCCCATGT-----TCCCTTCCTGTCTCT  
CTTCTTTCTTCTTCTTCCCCATTCCCTCTTTCTCTTCCCTT-----CCCC--  
-TTCTCTGCTCTCTCTTC---TTGCTCTCCTTCCAGTTTACTTCTTCCCTTTT-----



-----  
-----  
-----  
-ATTTTTGTT-----TGCTGTATGTGGACTTTGTTTCC-CATTAGAATCTAATCTGCTTG  
AAGTCAAGGGCTGCTTGGACTTTGTCTTTGCCCGTAGCC--TGG---CACACAG-----A  
GGCTCTGAACAA-TTGCTTGTGGAGTGATGC-----CTACCTTTCTTTCTTCTT  
CTCTGCTGTTACTTAACTACACTTTGGGTAGCGAGTGTCTCTAGAGTCCTCCCTTCCCA  
GGGAGTCTGGAGGGTGGTTCTGGA-----GGGCAGATCAGGTGTCTTCTCCTCCCGTGG  
CCTTTGCCTCTACTGGGCAGAGGTGGGG-TCAATCACTCACACCTGGTACCTCTTCTAG-  
-GATGAAGAGGGGAAGCAGCTGTCAGAT

>Ppe

-TGTTG-CTGGCCAAG--GTGAGCAAAGGA-GGCC-----AATGGTGAGAA-AGGGCCT-  
AGAGCTGTGGTCAAAGC----CTGGCTTTGACTTGATGCCATTTCTCTGAACCATCCCTC  
ACT-----

-----CAT-CA-TGC---CCT-----GTTCTCTTTCTT  
CCTCTTC---TCCTCCCTGCATGCCTCTTCCCCCTT-----TCCCTTCCTTTCTCT  
T--CTTCCTTTCTCCTCCTCATTCTCTT-CTCTTCTCTT-----CCCCG--  
-TTCTCTTCTCCTCCCTCTCCTTGCTCTTCTTCCATGCTACTTCTCCTTCCCTTTTTTT  
TTGGTCCATATGTATGTGTACTTTATTTTCCATTAGAA--CAGTGGTTCTCAATCTTCC  
TAATGCCGTGACCCTTTAATACAGTTCCTCATGTTGTGGTAACCCCCCAGCCATAAAAT  
ATTTTTGTTGCTACTTCATAACTGTAATTTGTTACTGTTATGAATCATAATGTAATAT  
CTGATACGCAGGATGTATTTAAATTGAAAATAACCTACAGGTTGAGAAGTCTG-----

-----CATTAGAATCTAATCTGCTTT  
AAATCAAGGGCTATTT-GCCTTTGTCTTTGCTCA-----CACAGAG-----  
-GTTCTGAACCA-TTGCTTGTGGACTGATTC-----CTACCTTTCTTCTTCTTCTT  
CTCTGC-----ATTGGGTAGCAAGTGCCCTCCAGAGTCCTCC-TTCCCT  
GGGAGTCTGGAGGGTGGTTCTGGA-----AGGCAGACGAGGTGTCTGCTCCTGGAATGG  
CCTTTGCCTCTACTGGGC--AGGTGGGGGGCAATCACTCACAAGTGGTACCCCTTCTAG-  
-GATGAAGATGGGAAGCAGCTGTCAGAT

>Tvu

-TGTTG-CTGGCC-----AGGGTGAGCCGAGGGCCT-  
AAAGTCATGGTCAAAGC----CTGACTTTGACTTTATGCCATTTCTCTGAACCATTCCTC  
ACT-----

-----CAT-CA-TCC---CCAAGCAAATCCTCTTTCTT  
CTTCCTC---TCCTCCCTCCATGCCTCTTCC-CTTT-----TCCCTTCCTTTATCC  
TTTCTTTCCCTTCTCTTCTTCTTCTCCTCCTCCTCCTCCTCCTTCTTCTTCTTCTTCTT  
-----TTCTTCTTCTTGCTCTCCTTCCATGCTACTTCTT--CCCCTTTATTT  
TTG-----

-----T-----CCTATATATGTGCACATTGTCCCCTATTAGAATCTAATCTGCTTG  
AAGTCAAGGGCTATTTTGCCCTTATCTTTGCTCATGGCC-----TGACACACAG-----T  
GGCTCTGAACAA-TTACTTGTGGATTGATTC-----CTACCTTCCCTTCTTCTTCTT  
CTCTGCTGTTCTTAACTAGGCATTGGGTAGCAAGTGCCTTCTATAG-----  
-----CTGGTTCTAGA-----GGGCGGGCCAGGCATCTGCTCCTGGGATTG  
TCTTTGCTTCTACTAGGCAGAGGTGGGG-CCAATTGCTCACAAGTGGTACTCCTTCTAG-  
-GATGAAGATGGGAAGCAGCTGTCAGAT

>Mr o

-TGTTG-CTGGCCAAG--GTGAGCAAAGAAA-GGCCCAGGGTAGGGTGAAGA-AGGGCCT-  
AGAGTCATGGTCAAAGC----CTGACTTTGACTTTATGCCATTTCTCTGAACCATCTCTC

ACT---CAATATCT---GGCTCAGGAGAAGAAGGTGAGATTGGTGACCTTGCACAGCCCT  
CTCTCACTCAAATCAAAGTCAGCTGCAAGTCACGTCATCATCT---TGATGTCATGGTCC  
TCTTCGAGAACAAGGACAGACA---CAAACAATCC---CCTAGCAAGTCCTCTTCCTT  
CTTCCTC---TCCTCCCTTCATGCCTCTTCTCCCCTT-----TTCTTCCTCTCCTCCT  
CTGTCTTCCCCTCCCCTCCCCTCCTCTCTCTCTTCTGTT-----CCCCTTT  
CTTC---CTTTTCTCCCCTTCTTGCTCTCCTTTCACACTACTTCCCTTTTATTTTTTGT-

-----CCTATGTATGTACATGTTGTCCCCATTAGAATCTGATCTGCTTG  
AAGTCAAGGGCTATTTTGCCTTTGTTTTTGTCTCATGGCC-----TGATACATGG-----T  
GGCTCTGAACAA-TTGCTTGTGGGTTGATTC-----CTACCTTCCCTTCCTTCTT  
CTCTGCTGTTCTTGACTAGC-ATTGGGTAGTGAGTGCTCCCTACAGTTCTCCCTTCCC-  
TGGGAGTTGGAGGGTGGTTCTGGA-----GGGTGGCCAGGTGTCTGCTCCTGGAATGG  
CCTTTCCTCTCTTGGGTAGAGGTGGGG-CCAATCAGTCACAACCTGGTACCCCTTCTAG-  
-GATGAAGATGGGAAGCAGCTGTCAGAT

>Ptr

-TGTTG-CTGGCCAAG--GTGAGCAAGAGA-GGCCCAGGGAAGGGTGGAGA-AGA-CCT-  
AGAGTGATGGTCAAAGC---CTGATTTTGACTT-ATGCCATTTCTCTGAACCATCTCTC  
ACT---CAATATCC---AGCTCAGGAGAAGAAGGTGAGGTTGGTGACCTTGCACAGCCCT  
CTCTCACTCAAATCAAAGTCAGCAGCAAGTCATGTCATCATCT---TGATGTCACGGTCT  
TCTTTGAGAATGAAGGACAAACA---CAAATAATCC---CCTAGCAAGTCCTCTTTCTT  
CTTCCTT---TTCTCCCTTCATGCCTCTTCTCCCCTT-----TTCTTTCTCTACTCCT  
TTGTCTCTCCTTCCCTTCTCTCTCTCTTTTCTCTTCCCTCTTCCCTT---CCTTTT  
CTTC-----CACTTCTTGCTCTCCTTTCATGATACTTCTCCTTCCCTTTT---

---ATTTTTAT-----CCTATGTATGTGCATATTGTCCCCATTAGAATCTGATCTGCTTG  
AAGTCAAGGGCTATTCTGCCTTTGTTTTTGTCTCATGGCC-----TGACACGCAG-----T  
GGCTTTGAACAA-TTGCTTGTGGATTAATTC-----CTACCTTCCCTTCCTTC-T  
CTCTGCTGTTCTTAACTAGC-ATTGGGTAGCGAGTACCTTCTACGGTCTCCTCCCTTCCC-  
TGGGAGTTGGAGGGTGGTTCTGGA-----GGGTGGCCAAGTGTCTGCTCCTGGAATGG  
CCTTTCCTCTC-----AGAAGTGGG--CCAATCAGTCACAACCTGGTACTCCTTCTAG-  
-GATGAAGATGGGAAGCAGCTGTCAGAT

>Vur

-TGTTG-CTGGCCAAG--GCGAGCAAGGGA-GGCC-AAGGAGGGGTGAGGA-AGGGCCT-  
AGAGTCATGGTCGAAGT---CGCT-----TCTCTGAACCATCTCTC  
ACT-----

-----CAT-CA-TTG---GCTAGCAAATCCTCTTTTCTT  
CCTCCCC---CTCTCCATNCCTCTCCCCCTTTCCCTTTGTCTTTTCTTCCCTTTGTCT  
TTTCTTTCCCTTCTCTTCTTCCCTTCTTCCCTCATTCCTCTTCTCTTCCCTT---CCCCCT  
CTTCTTCCCTTTCNTCCTTTTCTAGCTATCCTCGATGCCACTTCTCTTTCCCTTTT---

---ATTTTTGT-----CCTATGTATATGTATGTTGTCCCCATTAAAATCTAATCTGCTTG  
AAGTCAAGGGATGTTTTGCCTTTGTCTTTGCTCGCAGCC-----TGACACACACACTGAC  
AGCTCTGAACAA-TTGCTTGTGATAGATTC-----CTACCTCCCTTCCTTCT-

--CTGCGGTTCTCAACAAGGCACTGGGTAGGG-----TCCTCCCTTCCC-  
TGGGGTTTGGAGGGTGGTTCTAGA-----GGGCAGGCCAGGTGTCTGCTCCTGGAATGG  
CCTTTGCCTCTACTGGGCGGAGGTGGGG-CTAATCACTCACAACCTGGAACCCTTCTAG-  
-GATGAAGATGGGAAGCAGCTGTCAGAT



TTGTTCCCTTCCATTAG--GCCTGGGT

>Scr

ACTCGGCATTTGAACCCTTGGTGGCAAATGGGGCCCCAGCGTCTCTTGTTCCTCAA--GTA  
AGTAATGG-----AAAGTTT-AATAGAACTTAATAGAAAGTTTAAACAAGGAG  
GTAACAGCCTGAGTCTAAGTGAAGTCTGCCCAA-CCTGTACTTGGAACATCAGAACCATA  
AAAATTAATGAT-----

-----  
-----  
-----CCGATAATGG-----TTTCTCTCTGC-CTATCATGCT  
-GTTCCAGATAACAATCTGTTAGCTGCAGAGCCTTGAGCAGGATTAATTTCAA-TACCT  
TGATCTTTATATT---CCCACTGTGTTG-----  
---CTACATTAACATAATTCTTCTCCTGGGTT--ACATAAAGA---GGCCATGGCCAA  
GT-----CACATCCAAGATG-----CTT  
TTGTTCCCTTCCATTAG--GCCTGGAT

>Bi1

ACTCGGCATTTGAACCCCTGGTGGCAAATGGAGCCCCAGCATCACTTGTTCCTCAA--GTA  
AGTCAGAGTTCCCTTTATAGAATGTTTAGCAAGGATGGAA--GGA-----  
-----ACCTAAATCTAAGAGATTCTGCCTAGACCTGCTT--GTAAAGAATATCATAT  
CAAATTATTTAC-----

-----  
-----CCAATAACTC-----TTTTCTCTTTGC-ATGTCATGTT  
GGTTCAGGATAGATT---CACTGTCAGAGCCTTATGCAGGGTTAGTTTTTAAA-TACTT  
AGATCTTCTTCTTATTTCCCACTTGGTTTTTCATAAC--TGTCTCACCAA-TCGTTACCAA  
---TAATATTAATATAATTCTCT-CACGAATT--GGATCAAGAAAGAAGCCTTGTTCAA  
GTTAGATGTAGCCTTGAGAAATGACACTTCTCAAGAGATCCCCAATTG-----CCT  
TTATTTCTTCCATTAG--ACCTGGAT

>Ppe

ATTCAGCATTTGAACCTCTGGTCGCAAATGGAGCCCCAGCATCTCTTGTTCCTCAA--GTA  
AGTGATAGTTCCCTTAATAGAATGTTTAAACGAGAAGGCAAACAGA-----  
-----GCCTGCGTCTAAGTGATTTTGCCCCAACCTGTACTC-GATAAGAACATCAGAC  
CTAATTAATTAC---CCAGTAACT---AGAGGCAGCTAGCTTATGCAGTGAATAGAGCA  
CTGGCCCTGGAGTGAGGAGGACCTGAGTTAAATCCAAATGC---CACTTAA-----CT  
AGCTGTGTGACCTTGAGCAAGTCACTTGACCCCGAT-----CCCCGCGAA-  
-----AAAA-----AGTAACT-----CTTTCTCTTTGC-TTATCATGTT  
GGTTCAGATAGAATTTGTCACCTTCCAAGCCATAAGCAGTGTAAATTTTCAA-TATTT  
AATTCTTCGTCATGTTCCAGTTTGTTCATAACTCCACCTCGCTAAA-TTGTTAGCAG  
---TTACATTAACATAATTCTTCTCCTGGGTT--GCATAAAGAAAGAAGCCATGGCTAG  
GTTAGATGTAGCCTTGAGAAATATCACTTCCAAGAGATACTTGACTA-----CCT  
TTGTTCCCTTCCATTAG--GCCTGGAT

>Tvu

ACTCAGCATTTGAACCTCTGGTCGCAAATGGAGCCCCAGCATCTCTTGTTCCTCAA--GTA  
AGTCATAGTTCCATTAATAGAATGTTTAAACGAGAAGGTAACAGA-----  
-----GTCTAAGTGATTCTGCCCAAACCTATACTC-ATCAAGAACATCAGGC  
TTAATTAATTAC---CCAGTAACT---AGAGACAGCTAGGTGTAGCAGTGAATAGAGCA  
TCTGCCTTGGAGTCAGGAGTT-----CAAACAGCCTCAGACACTTGACACTAGCT  
A----TGTGACCTTCGGCAAGGCACTTAACCCTGATTGCCTCATCTCCCCCCCCAAAGAAA  
AAG-----ATTA---CCCAGTAACT-----GTTTCTCTTTGTTTTATCATGTT  
GGTTCT-GTTGAATCTGTCACCCTT-AGAGCCTTAAAGCAAGCTTAAAGTTTCAA-TACTT  
AGATCTTCATCATATTTCCAATTTGTTTTCGTAACTCCACCTAGCTGAA-TTGTTAGCAA  
TTATTACATTAACATAATTTCTTCTACTGGGTT--GCATAAAGAAAGAAGCCATGGCCAA  
GTTAGATGTAGCCTTGAGAAATGTCACTTCCAAGAGATACTTGACTA-----CCT  
TTGTTCCGTCATTAG--GCCTGGAT

>Mr0

ACTCAGCTTTTGAACCTCTGGTTGCAAATGGAGCCCCAGCATCTCTTGTTCCTCAA--GTA  
AGTAAA-----AGTAGAATGTTTAGCAAGAAGGGAAACAGA-----  
-----GCCCGAGTCTAAACGATTCTCCCCAAACCTCTACTC-ACTAAGAACATCAGAC  
CTAATTAATCAC--CCCAGTAAT---GAGAGGCAGCTAGGTAGAGCAGTGAGTAGGGTA  
CCTGCCCTGGAGTCAGGAGAACCTGAGTTCAAACCCAGCCTCAGACACTTGACACTTACT  
AGTTGTGTGACCTTGGACAAGTCACTCAACCCTGATTGCCTCGCCTACCCCTTCCAAAA  
GAGAAAAAAAAAAATTA---CCCAGTAACT-----GTTTCTCTTTGC-TTATCATGTT  
GGTTCAGGGTCAAATCTGTCACCCTTGGAGCCTTAAACTGGGTAAAGTTCCAAA-TACTT  
AGATCTTCCTCATATTTCCAGTTTATTTTCATAACTCTGCCTAGCTGAA-TTGTTAGCAA  
---TCACATTAGCATACTTCTTCTCCTGGGTT--ACATGAAGAGAGAAGCCATGGCCAT  
GTTAGAGGTAGCCTTGGAGAACGTCACCTTCCAAGAGATGCCTGACTG-----CCT  
TTG-TCCTCCCCTAG--GCCCGGAT

>Vur

ACTCAGCGTTTGAACCCCTGGTCGCAAATGGAGCCCCAGCATCTCTGGTTTCCTCAA--GTA  
AGTAATAGTTCCCTAAATAGAACGTTTAGCAAAGAGGTAAACAGA-----  
-----GCCTGCGTCTGAGTGATTCTGCCAGACCTTACTC-ATTAAGAACATCAGAC  
CTAATTAGTTG-----  
-----  
-----TCCAGTAACT-----GCTACTCTTTGC-TTTTCTTGTT  
GGTTCAGGATAGTATCTGTCACCCTCAGAGCCTTAAAGCAGGGTTAAATTTCAAATACTT  
AGATCTTCCTCATATCCCCAGTTTGTTCATAACT--GCCTAGCTGAAATTGTTACCAA  
---TTATGTTAACATAACTCCTTCTCCTGGGTT--ACTTAAAGAGAGAAACCATGGCCAA  
GTTAGATGTAGCCCTGAGAAA-----TCT  
TTGTTCTTCCATTAG--GCCTGGAT

MARKER 205

>MIR3\_MarsA

-----  
-----  
-----GGGAAG-CAGCGTGGTACAGTG---GAAAGAGCG----C-----T  
GGATTTGGAGTCAGAGGACCTGGGTTCAAATCCCGGCTCTGCCACTTACTACCTGTGTGA  
CCTTGGGCAAGTCACTTAACCTCTCTG----GGCCTCAGTTTCCTCATCTGTAAAATGAG  
GGGGTTGGACTAGATGACCTCTAAGGTCCCTTCCAGCTCTAAATCTATGATCCTATGATC  
CTATGA-----  
-----  
-----  
-----  
-----

>Mdo

CTTTCCATGGGGATGATCTGCTGCATCCGGAAATATATCCCAGAGGG--GTGAGCAGGCC  
AAGCCAGGGGCCCCGGAGGCTGG-CCTGGGGGGGCAGGGGAGCCTGGG-GG-----  
-----GGCACTGGA-----  
-----  
-----  
-----

-----GCC-GCTCTG-GCGTCCCC-----TTCCTCCTCCTTGCAGAGGGCCC  
TACATTTCCGTCCTGA-CACTGTGG-----TCCAGAA-----GGCTG  
GGCTCTGGGTCC----TGTGGT-CCCGCCAGCCCTTGC GGAT-TGGGGAG----CAGACA  
GGGGC--CCCC--GGGAAGGCTCCGGAGTCAGCACTGTGTCCC-AGCTCCTCTTTCCGAT  
CCCTGGACAG--ATGCTGCCGTTACCTGACCCTGCAGACCCGAACGCTCATCAGCGTGGG  
CATCTTCTC

>Tel

CTTTCCATGGGGATGATCTGCTGCATCCGGAAATATATCCCAGAGGG--GTGAGGAGGCT  
AAACCAGGGGCTGGAGGCTGG-CTTGGGGGGACCGGGAGTGGGGTGGGGGGCCGTTCTG  
CTGCCGGGCACTGGA-----  
-----  
-----  
-----

-----GCC-GTTCTG-GCATCCCA-----TTCCTCCCCTTGCTCCTTGCCGT  
CCGG-----CCCTAGACTTCTGTGTCCGTGGCACTGCGGTCTAGAA-----GGCTG  
GGCTGTCCGCCCT--GTGGGT-CCCACCAGCCCTTGGGGATTTGGGGAG----AAGACA  
GGGGC--CCCCTGAGGAAGGCTCCAGAGTCAGCACTGTGTCCC-AGCTCCTTTTTCCAAT  
CCCTGGACAG--ATGCTGCCGTTACCTGACCCTGCAGACCCGAACGCTCATCAGCGTGGG  
CATCTTCTC

>Dvi

CTTTCCATGGGGATGATCTGCTGCATCCGGAAATATATCCCAGAGGG--GTGAGGAGACT  
AAGGCAGTGGCCTAGAGGCTGG-CCTGGGGGGGTGAGGGTGGGGGGTGCTG---GTTCTG  
CTGCCTGGCACCGGA-----  
-----  
-----  
-----

-----GCT-TCCCTG-GCATCCCA-----TTCCTCCTCCTGCTCCTTGCCAT  
CCTG-----CCCTAGATTTCTGTGG-----TCTAGAA-----GGCTG  
GCTCTTGGTCCTTGGGTCCCACCAGCCCTTGGGGATTTGGGGA-G-----AAGACA  
GGGGC--CC-GTGGGGAAGGCTCCAGAGTCAGCACTGTGTCCC-AGCTCCTTTTTCCAAT  
CCCTGGACAG--ATGCTGCCGTTACCTGACCCTGCAGACCCGAACGCTCATCAGCGTGGG

CATCTTCTC

>Rra

ATTTCCATGGAGATGATCTGCTGCATCCGGAAATATATCCCAGAGGG--GTGAGGAGGCC  
AAGGCAAAGGCCTGGAGGCTGGACTTGGGG-----TGGGGTGGG-GG-AGGACG  
GGGCAGGGCA-GGGA-----GATGGAGCAGCCAC---  
--TGCCC-----AACTTGAGCTCAGAGGCAGAT---CCCATGTCTGCTCCTC  
TTTGTCTGG----GTCACTCCCACACCCTG---GAGGTCCAAGTAGATAACTT-----  
-----CCCCA-----AG-----  
-----CCC-TCTGTC-TGTACAT-----GCCA-----CTAG  
GACTGGAGCTCTCCAGG-----CCCTACGGGTCATGC-TA-----GCCCTTGAG  
GGTTT-AAGAGGAAAGGGGATGGGTGGCACCCTTC---TT-GGCCTAGGCCACAGACA  
GGGGG-TCCTGTGGGGAAGGCTGGTGAGTCAGCCCTGTGTCCCAGCTCCTTTCTCCAAT  
CCCCGGACAG--ATGCAGCCGTTATCTGACCCTGCAGACCCGAACGCTCATCANTGTGTG  
CATCTTCTC

>Cfu

ATTTCCATGGGGATGATCTGCTGCATCCGGAAATATATCCCAGAGGG--GTGAGGAGGCC  
AAGGCAAAGGCCTAGAGGCTGGACTTGGGG-----TGGGGTGGG-GG-NGAACG  
GGGTGGGGCG-GGGA-----GATGGAGCAGCCAC---  
--TGCCC-----AGCTTGAGCTG-GTGGCAGAT---CCCATGTCTGCTCCTC  
TTTGTCTGG----GTCACTCCCACACCCTG---GAGGTCCAAGTAGATAACTT-----  
-----CCCCA-----AG-----  
-----CCC-TCTGTC-TGTACAT-----TCGT--AAGCCACTAT  
GACTGGAGCTCTCCAGG-----CCCTACGGGTCATAC-TA-----GCCCTTGAG  
GGTTT-AAGAGGAAAGGGGATGGGTGGCACCCTTC---TT-GGCCCAGGCCACAGACA  
GGGGG-TCCTGTGGGGAAGGCTGGTGAGTCAGCCCTGTGTCCC-AGCTCCTTTCTCCAAT  
CCTCGGACAG--ATGCAGCCGTTATCTGACCCTGCAGACCCGAACGCTCATCAGCGTGGG  
CATCTTCTC

>Dg1

ATTTCCATGGGGATGATCTGCTGCATCCGGAAATACATCCCAGAGGG--GTGAGGAGGCC  
CAGCTGAG-GCCTGCAGGCTGGGCTTGGGT-----AGGGTTGTGGG-CA-----  
-----TGGGG-----  
-----CCCC  
AGCTCTGGT---ATCA-CTTTACACCCTG---GGCCTCAGTCTGCTCGTGTCTGCAGT  
GAGGAGGCTGAG-----CTGTCCCT-----AGATGTACTTGCCT---  
-----GTG-TCACTG-TCCGGAA-----GACTGGTTGGT---CCCTTGG  
GGCATCTGGGAA-----A-----GCACTTGTG  
GGTTT-AGGGAGGAAAGGGGA-----AGATG  
GGGA-AGACTGTGGGGAAGGCTGCTGAGCTGGCGCTGTGTCCC-----  
---TGACAG--ATGCAGCCATTACCTGACCCTGCAGACCCGAACACTCATCAGCGTGGG  
CATCTTCTC

>Dgo

ATTTCCATGGGAATGATCTGCCACATCCGGAAATATATCCCAGAGGG--GTGAGGAAGCC  
GAGCC-AGCGGCTGGACGCTGGACTTGGGC-----GGGCCGTGGG-CA-----  
---TCGGGCA-GGGA-----GTCGGAGCAGCTGC---  
--TGCCC-----GGGGTCAGCTGCAGGACA-TTGAAG-AGGGCCCCAGCCTTGCTCCTT  
TTCTCCTGG---GTCA-CTCTACATCCCC---GCCCTCAGTTTCCCCATCTGTTTCACT  
GAGGAGGTTG-----GCGGG-----  
-----  
-----AGCCCATGTGAGCGGTTG-----GCAC---TG  
GGTT---GGGAG-----CCCTCGATG-CCCGGGGGTCCCCC-TG  
G---CGCTTGGTGTGG-GGCCGTTGAGGCGACACCGAGTCCC-AGCCCCGCTTTCCCAT  
ACTTGGACAG--GTGCAGCAATTACCTGACCCTGCAGACCCGAACGCTGATCAGTGTGGG  
CATCTTCTC





>human

```
ATCTCCTTGGGGCTGGTCAGTTGCATCCAGAGATGCCTCCCTCAGGG--GTAAGGAGTGA
AACTGGAAGGGC-ACAGGTGCCACCAGGGA---GGGCTGGGCCAGCTCC-CA-----
-----AGGCT-GA-----
-----
-----
-----
-----GGTTCCTGAGCTGGGCAGATACAGGACAGCAGCCATTGGCAGTCACGG
GGCA-----GCCCTCCCCTATGACAACCATTTGTCTTAGCCCTACATCCGCTCATTTGATG
CAGTCAGACATGA--GTGTGCC-CAGGGAGGTTCTTCCCCTTGGTGTCTCCCCTGAGACA
GT-TCACAGCCA-CCCGAGGCT---GGCCTCAAGAGGACCCCC-TGCAGCCCTTGCCCT
CTCCA-ATAG--GTGTGGCCCCTACCAGACCCCGCAGACCCGGGCACTTCTCAGCATGGC
CATCTTCTC
```

MARKER 206

>WSINE1

-----  
-----  
-----TTTTTTTTTTTTTT-----  
-GAGGCAATTGGGGTTAAGTGAAGTGGCCAGGGTACACAGCTAGTAAGTGTCTGAGGCT  
GGATTTGAACTCAGGTCCTCCTGACTCCAGGGCTGGTGTCTATCCACTGCACCACCTAG  
CTGCCCTC-----  
-----

>Mdo

CCTTAGGAAAACA--CTGTAGGGGAAGGGCAGAAAAGGCACTA-CTGCTTTAGCTTAGC  
-----TTTTAGTTAGCTTCCAAGCC-AGTTCCTCCACTGC-AG  
CGGAGCCTCC--TCCCTGTCTAG-----  
-----  
-----TTTTCAACAGAA--TTTCTGCTCACGTCTCCCAG  
CACCTGAATTAC--CTTCTTCTCCTT

>Dvi

CCTTAGGAAAACA--CTGTAGGGGATTGTAGAACAAGGCGTTA-CTGCTTTAGGTTAGC  
CCCATCTAGTC-----TTTAGCTTAGTTTTCCAATCAAATTCCTTAACCCC-AG  
CCATGCTTTA--TCCCTGTCCAG-----  
-----  
-----TTTTCAACAGAA--TTTCTACTAACTTCTCCCAG  
CACCTGTATTAC--CTTCTTCTCCTT

>Mnu

CCTTAGGAAAACA--CTGTAGGGGAAATGTAGAACAAGGCATTA-CTGCTTTAGGTTAGC  
CCCATCTAGTC-----TTTAGCTTAGTTTTCCAATCAAATTCCTTAACTCC-AG  
CCATGCTTTG--TCCCTGTCCAG-----  
-----  
-----TTTTCAACAGAA--TTTCTACTAACTTCTCCCAG  
CACCTGTATTAC--CTTCTTCTCCTT

>Bil

CCTTAGGAAAACA--CTGCAGGGGAGGAATAGAGAAACACATTA-CTACTTTAAGTCGGC  
ACCATTAGTCAGCAGAAA-TCATAGC----TTTTT-ATCCAAATTCCTTAACACCAAT  
TAAAGTGTCC--TACCCCTCTAG-----  
-----  
-----TTTTCAACAGAA-ATTTCTATTAACTTCCCCCAG  
AACCTCTATTAC--CTTTTTTTCCTT

>Pgu

CCTTAGGAAAACA--CTGCAGGGGAAGAAAAGAGAAATGCATTA-CTATTTTAAGTTGGC  
ATCATCTAGTCGGCAGAAA-TCATAGC----TTTTCAATCAAATTCCTTAACACCAAT  
TAAAGTGTTC--TAACCCTCTAG-----  
-----  
-----TTTTCAACAGAA-GTTTCCACTAACTTCCCCCAG  
AACCTCTATTAC--CTTTTTTTCCTT

>Tro

CCTTAGGAAAACA--CTGCAGA-GAAAGAACAGAAAATGCATTAAGTCTAGGTTGGC  
ACCACTTAGCCAACAGAAC----TGC----TTTTCAAGTTCAAATTCCTTAATACC-AG

TTAAGCTTCC---TGTTCTCTAG-----TATTTTTGGGGGGGGTGAAGAGGG  
GGAGGCAATTAGAGTTAAGTGACCTGCCAGGGTCACACAGCTAGT---GTATGAAGTG  
GGATTTTAACTCAGGTCTTCACC--TCCACAGCCAGTACTCTTTCTACTG-CCCCCT-CA  
CTGCCCTC-C---TGCCCCTCTAG----TTTCAACAGCA--TTTCTACTAACTTCCCTTGG  
CACCTTCTGTTAC--CTTCTTCTCCTT

>Ppe

CCTTAGGAAAACA--CTGCAGGGGAAGAAGAACAGAAAAATGCATTAAGTCTTTAGGTTGGC  
ATCATTTAGTCAACAGAAATCGTATGC-----TTTTTCAGTTAAAATTCCTTAACACC-AG  
-----CTTCC---TGCCCCTCTAG-----TTTTTTTTGGGGGGTAGGGGGTGGG--GAG  
GGAGGCAATTGAAATTAAGTGACTTGCCCGGGGTACACATCTAGT---GTCTGAAGCA  
GAATTTGATGTCAGGTCCTCAAC--TCCAGGGCCAGTATGCTATCAACTGCACC--TACC  
CTGCCCT-C---TGCCCCTCTAG----TTTCAACAGAA--TTTCTACTAACATCCCTCAG  
CACCCACTGTTAC--CTTCTTCTCCTT

>Mr0

CCTTAGGAAAACA--CTGCAGGGGAAGAATAGAAAAATGCATTAAGTCTTTAGGTTGGC  
ACCATTTAGTCGATAGAAG-TCATAGC-----TTTTTCAGTTCAAATTCCTTAACACC-AG  
CTATGCTTCC---TGCTCCTCTAG---TTTCTTTTCTTTTTTTTTGGGGGGGGGGGGTGA  
GGAGGCAATTAG--TTAGGTGACTTGCCAGGGTCACACATCTAGT---GTCTGAAGCA  
GGATTTGAACTCGGGTCCTG-AC--TCCAGGGCCAGTCTCTACCCCTGCACCACCTAA  
CTGCCCCCT---TGCCCCTCTAT----TTTCAACAGAATTTTTCCACTAACTTCCCTGAG  
CACCCCTTTGTTAC--CTTCTTCTCCTT

>Vur

CCTTAGGAAAACA--CTGCAGGGGAAGAATAGAAAAATGCATTAAGTCTTTAGGTTGGC  
ACCATTTAGTCAACAGAAG-TCATTGC-----TTTTTCAGTCCAAATTCCTTAACATC-AA  
CTAAGCTCCC---TGCCCCTCTAG-----TTTTCTTTCTTTCTTTTTTTTTGGGGGGGGGA  
GGAGGCAATTGGGATTAAGTGACTTGCCAGGGTCACACAGCTAGT---GTCTGAGGCA  
GCATTTGAACTCAGGTCTTCTGACTTTCAGGGCCCATGCTCTATCCACTGCACCCTTAA  
CTGCCCC-T---TGCCCCTCTAG----TTTCAACAGAA---TTCTGCTAACTTCCCTCCAG  
CACCTTTTGTAC--CTTTTTTTCTCCTT
